# Supplementary material for: Efficient sentence processing significantly affects the position of objects in Russian
Source: publisher site journal article supplement (doi:10.1515/ling-2023-0164), 2025-11-19
Supplement: Supplementary file 1 [file j_ling-2023-0164_suppl_001.xlsx]

## Sheet: Sheet1
id	X	X1	X2	clause_type	verb_impf	prefixed	negation	aspect	secondary_aspect	tense_mood	finiteness	word_order	adjacency	object_type	object_def	object_anim	object_number	object_case
1	в обстановке почти обыденной, не	снимая	пальто и под гул пропеллеров [Показать структуру]	subordinate	snimat	PREF	NEGAT	imperfective	no	nfin	converb	vo	0	np	def	inanim	sg	nomacc
2	том, с какого года следует	начинать	этот великий отсчет: то ли [Показать структуру]	subordinate	nacinat	PREF	AFFIRM	imperfective	no	nfin	dep_infinitive	vo	0	np	def	inanim	sg	nomacc
3	его должности председателя Госсовета, и	его	называют проще - руководителем или еще [Показать структуру]		nazyvat	PREF	AFFIRM	imperfective	yes	present	yes	ov	0	pers_pro	def	anim	sg	acc
4	рода, потому что если бы требовалось	вывести	образ политического героя нашего времени [Показать структуру]	subordinate	vyvodit	PREF	AFFIRM	perfective	no	nfin	dep_infinitive	vo	0	np	def	inanim	sg	nomacc
5	То есть все постепенно	узнавали	то, о чем республика знала [Показать структуру]	main	uznavat	PREF	AFFIRM	imperfective	no	past	yes	vo	0	dem_pro	def	inanim	sg	acc
6	о ситуации на Северном Кавказе	содержал	только количество регионов, в которых [Показать структуру]		soderzat	PREF	AFFIRM	imperfective	no	past	yes	vo	1	np	def	inanim	sg	nomacc
7		Движение	они не регулировали, так как сплошной [Показать структуру]		regulirovat	NONPREF	NEGAT	imperfective	no	past	yes	ov	2	np	def	inanim	sg	nomacc
8	что все европейцы - полиглоты, не	знают	ни одного языка. [Показать структуру]		znat	NONPREF	NEGAT	imperfective	no	present	yes	vo	1	np	indef	inanim	sg	gen
9	Кроме того, они не	знают	собственного города! [Показать структуру]		znat	NONPREF	NEGAT	imperfective	no	present	yes	vo	0	np	def	inanim	sg	gen
10	в которую, если верить преданиям,	завернули	тело Иисуса Христа после казни [Показать структуру]		zavoracivat	PREF	AFFIRM	perfective	no	past	yes	vo	0	np	def	inanim	sg	nomacc
11	Но даже когда я	нашел	эту часовню без помощи полиции [Показать структуру]		nahodit	PREF	AFFIRM	perfective	no	past	yes	vo	0	np	def	inanim	sg	nomacc
12	Зато довелось	выпить	чашку главного местного напитка - "бичерины [Показать структуру]	main	pit	PREF	AFFIRM	perfective	no	nfin	dep_infinitive	vo	0	np	indef	inanim	sg	acc
13	мониторах в пресс-центрах и удавалось	посмотреть	Олимпиаду, так как на трибунах категории [Показать структуру]		smotret	PREF	AFFIRM	perfective	no	nfin	dep_infinitive	vo	0	np	def	inanim	sg	acc
14	Парикмахеры тоже соревнуются, но спортом	это	все же не называют. [Показать структуру]	main	nazyvat	PREF	NEGAT	imperfective	yes	present	yes	ov	3	dem_pro	def	inanim	sg	nomacc
15	Из десяти номеров нашего отеля	шесть	оккупировала Россия. [Показать структуру]		okkupirovat	NONPREF	AFFIRM	perfective	no	past	yes	ov	0	quant	indef	inanim	sg	nomacc
16	Поэтому	нас	всех поначалу называли руси - "русские [Показать структуру]		nazyvat	PREF	AFFIRM	imperfective	yes	past	yes	ov	1	pers_pro	def	anim	pl	acc
17	династии, которая в XX веке	дала	стране академика, члена-корреспондента АН СССР [Показать структуру]		davat	NONPREF	AFFIRM	perfective	no	past	yes	vo	1	np	indef	anim	sg	acc
18	общем, если бы мне предстояло	написать	сценарий многосерийного фильма, посвященного истории [Показать структуру]	subordinate	pisat	PREF	AFFIRM	perfective	no	nfin	dep_infinitive	vo	0	np	indef	inanim	sg	nomacc
19	В беседе Добрецов нередко	вспоминает	тот или иной эпизод из [Показать структуру]		vspominat	PREF	AFFIRM	imperfective	no	present	yes	vo	0	np	def	inanim	sg	nomacc
20	Знаменит он тем, что	создавал	единую систему геодезических координат в [Показать структуру]		sozdavat	PREF	AFFIRM	imperfective	no	past	yes	vo	0	np	def	inanim	sg	acc
21	по матери - Н. Г. Келль -	производил	неизгладимое впечатление на каждого, кто [Показать структуру]		proizvodit	PREF	AFFIRM	imperfective	no	past	yes	vo	0	np	indef	inanim	sg	nomacc
22	Студенты	принимали	его за местного мужика, и [Показать структуру]		prinimat	PREF	AFFIRM	imperfective	no	past	yes	vo	0	pers_pro	def	anim	sg	acc
23	Все равно тебе не	чего	делать…" [Показать структуру]	main	delat	NONPREF	NEGAT	imperfective	no	nfin	infinitive	ov	0	neg_pro	indef	inanim	sg	gen
24	изумление, когда "дед" во главе комиссии	принимал	зачет по геодезической практике!" [Показать структуру]		prinimat	PREF	AFFIRM	imperfective	no	past	yes	vo	0	np	def	inanim	sg	nomacc
25	Тогда я	расспрашивал	Н. Г. Келля о науке [Показать структуру]	main	rassprasivat	PREF	AFFIRM	imperfective	no	past	yes	vo	0	name	def	anim	sg	acc
26	А почему бы не	продолжить	разговор с внуком?! [Показать структуру]	main	prodolzat	PREF	NEGAT	perfective	no	nfin	infinitive	vo	0	np	def	inanim	sg	nomacc
27		Освобождая	страну, Хрущев медленно освобождался сам [Показать структуру]	subordinate	osvobozdat	PREF	AFFIRM	imperfective	no	nfin	converb	vo	0	np	def	inanim	sg	acc
28	Отставной советский вождь Никита Хрущев	диктует	свои воспоминания. [Показать структуру]		diktovat	NONPREF	AFFIRM	imperfective	no	present	yes	vo	0	np	def	inanim	pl	nomacc
29	Перед глазами - товарищ Сталин,	которого	он сам выгнал из мавзолея [Показать структуру]	subordinate	vygonjat	PREF	AFFIRM	perfective	no	past	yes	ov	2	relative_pro	def	anim	sg	acc
30	КПСС тайком от бывших товарищей	подводит	итоги прожитой жизни. [Показать структуру]		podvodit	PREF	AFFIRM	imperfective	no	present	yes	vo	0	np	def	inanim	pl	nomacc
31		Устанавливал	советскую власть на Украине. [Показать структуру]		ustanavlivat	PREF	AFFIRM	imperfective	no	past	yes	vo	0	np	def	inanim	sg	acc
32		Прошел	все ступени партийной карьеры, получив [Показать структуру]		prohodit	PREF	AFFIRM	perfective	no	past	yes	vo	0	np	def	inanim	pl	nomacc
33	После сталинских чисток	занимал	место расстрелянных и запытанных: во главе [Показать структуру]		zanimat	PREF	AFFIRM	imperfective	no	past	yes	vo	0	np	def	inanim	sg	nomacc
34	как и все наши партайгеноссен,	осуществляя	общее руководство над генералами, дослужился [Показать структуру]	subordinate	osuscestvljat	PREF	AFFIRM	imperfective	no	nfin	converb	vo	0	np	def	inanim	sg	nomacc
35	и все сталинское руководство, он	запятнал	себя участием в чудовищных преступлениях [Показать структуру]		pjatnat	PREF	AFFIRM	perfective	no	past	yes	vo	0	refl_pro	def	anim	sg	acc
36	из того "сброда тонкошеих вождей",	которых	Мандельштам рифмовал с "полулюдьми". [Показать структуру]	subordinate	rifmovat	NONPREF	AFFIRM	imperfective	no	past	yes	ov	1	relative_pro	def	anim	pl	acc
37	Но все же	кого	следует считать юношей, взрослым, стариком [Показать структуру]	main	scitat	PREF	AFFIRM	imperfective	no	nfin	dep_infinitive	ov	0	inter_pro	indef	anim	sg	acc
38	Как	определять	границы этих самых "еще" и [Показать структуру]	main	opredeljat	PREF	AFFIRM	imperfective	no	nfin	infinitive	vo	0	np	def	inanim	pl	nomacc
39	кто уже не в силах	держать	копье или каменный топор, переходит [Показать структуру]	subordinate	derzat	NONPREF	AFFIRM	imperfective	no	nfin	dep_infinitive	vo	0	np	indef	inanim	sg	nomacc
40	Когда крестьянин	женил	старшего сына, он считал себя [Показать структуру]		zenit	NONPREF	AFFIRM	perfective	no	past	yes	vo	0	np	def	anim	sg	acc
41	Как именно следует	называть	человека в тот или иной [Показать структуру]	main	nazyvat	PREF	AFFIRM	imperfective	yes	nfin	dep_infinitive	vo	0	np	def	anim	sg	acc
42	формирования правил, по которым государство	строит	отношения со своими гражданами. [Показать структуру]		stroit	NONPREF	AFFIRM	imperfective	no	present	yes	vo	0	np	def	inanim	pl	nomacc
43		Разрабатывая	законы о защите детства или [Показать структуру]	subordinate	razrabatyvat	PREF	AFFIRM	imperfective	yes	nfin	converb	vo	0	np	def	inanim	pl	nomacc
44	Каждый возрастной период	имеет	свои особенности в физическом и [Показать структуру]		imet	NONPREF	AFFIRM	imperfective	no	present	yes	vo	0	np	def	inanim	pl	nomacc
45		КОГО	СЧИТАТЬ МОЛОДЫМ? [Показать структуру]	main	scitat	PREF	AFFIRM	imperfective	no	nfin	infinitive	ov	0	inter_pro	indef	anim	sg	acc
46	назад Бенджамином Томсоном графом Румфордом,	подарившим	человечеству кофейник, кухонную плиту, центральное [Показать структуру]	subordinate	darit	PREF	AFFIRM	perfective	no	past	participle	vo	1	np	indef	inanim	sg	nomacc
47	века преподаватель института Хамфри Дейви	основал	новую науку - электрохимию, открыл более [Показать структуру]		osnovyvat	PREF	AFFIRM	perfective	no	past	yes	vo	0	np	indef	inanim	sg	acc
48	Королевским институтом стояла масштабная задача:	доводить	до самых широких слоев общества смысл всех новейших достижений науки [Показать структуру]	main	dovodit	PREF	AFFIRM	imperfective	no	nfin	infinitive	vo	5	np	indef	inanim	sg	nomacc
49	на ярких публичных лекциях, которые	собирали	сотни людей, жаждущих знать, что [Показать структуру]		sobirat	PREF	AFFIRM	imperfective	no	past	yes	vo	0	np	indef	inanim	pl	nomacc
50	Популяризаторская деятельность института всегда	вызывала	огромный интерес среди лондонцев. [Показать структуру]		vyzyvat	PREF	AFFIRM	imperfective	yes	past	yes	vo	0	np	indef	inanim	sg	nomacc
51	за всю историю Королевского института,	продолжая	традиции, активно занимается популяризацией науки [Показать структуру]	subordinate	prodolzat	PREF	AFFIRM	imperfective	no	nfin	converb	vo	0	np	def	inanim	pl	nomacc
52	бы хотелось думать, что я	открываю	двери института, прежде всего, для тех [Показать структуру]		otkryvat	PREF	AFFIRM	imperfective	no	present	yes	vo	0	np	def	inanim	pl	nomacc
53	Как электричество, леди Гринфилд может	вызвать	шок, а может и пролить [Показать структуру]	main	vyzyvat	PREF	AFFIRM	perfective	no	nfin	dep_infinitive	vo	0	np	generic	inanim	sg	acc
54	лекционной аудитории, быстрая, как огонь,	комментирующая	нейрохимию человеческого мозга, посвящающая людей [Показать структуру]	subordinate	kommentirovat	NONPREF	AFFIRM	imperfective	no	present	participle	vo	0	np	generic	inanim	sg	acc
55		Сталина	разоблачили вчерашние сталинцы. [Показать структуру]	main	razoblacat	PREF	AFFIRM	perfective	no	past	yes	ov	0	name	def	anim	sg	acc
56	Верхушка КПСС	выбрала	некровожадный социализм. [Показать структуру]		vybirat	PREF	AFFIRM	perfective	no	past	yes	vo	0	np	generic	inanim	sg	nomacc
57	Прошу	вытерпеть	цитату. [Показать структуру]	subordinate	terpet	PREF	AFFIRM	perfective	no	nfin	dep_infinitive	vo	0	np	def	inanim	sg	acc
58	Тот, кто	дочитает	ее до конца, будет вознагражден [Показать структуру]		docitatyvat	PREF	AFFIRM	perfective	no	future	yes	vo	0	pers_pro	def	anim	sg	acc
59	Ту картину, которая сначала	воодушевила	сотни миллионов людей, потом смертельно [Показать структуру]		voodusevljat	PREF	AFFIRM	perfective	no	past	yes	vo	0	np	indef	inanim	pl	nomacc
60	"	Заслушав	доклад тов. Хрущева Н. С. [Показать структуру]	subordinate	zaslusivat	PREF	AFFIRM	perfective	no	nfin	converb	vo	0	np	def	inanim	sg	nomacc
61	А еще там содержалось то,	чего	не предвидели ни докладчик, ни [Показать структуру]	subordinate	predvidet	PREF	NEGAT	perfective	no	past	yes	ov	0	relative_pro	def	inanim	sg	gen
62	Сигнал,	который	ни те, ни другие, ни третьи уже не смогут забыть. [Показать структуру]	subordinate	zabyvat	PREF	NEGAT	perfective	no	nfin	dep_infinitive	ov	7	relative_pro	def	inanim	sg	nomacc
63	декабря 1955 года, президиум ЦК	учредил	комиссию, которая должна была разобраться [Показать структуру]		ucrezdat	PREF	AFFIRM	perfective	no	past	yes	vo	0	np	indef	inanim	sg	acc
64	заинтересован в том, чтобы добросовестно	раскрыть	эти дела. [Показать структуру]	subordinate	raskryvat	PREF	AFFIRM	perfective	no	nfin	infinitive	vo	0	np	def	inanim	pl	nomacc
65		Охарактеризуйте	, пожалуйста, состояние области науки, в [Показать структуру]		harakterizovat	PREF	AFFIRM	perfective	no	nfin	yes	vo	1	np	def	inanim	sg	nomacc
66	Какие из них не	потеряли	актуальности на сегодняшний день (что [Показать структуру]		terjat	PREF	NEGAT	perfective	no	past	yes	vo	0	np	generic	inanim	sg	gen
67		Охарактеризуйте	сегодняшнее состояние той области науки [Показать структуру]		harakterizovat	PREF	AFFIRM	perfective	no	nfin	yes	vo	0	np	def	inanim	sg	nomacc
68	Какие	работы	последних лет вы считаете самыми [Показать структуру]		scitat	PREF	AFFIRM	imperfective	no	present	yes	ov	3	np	indef	inanim	pl	nomacc
69	быть решены, какие задачи будут	волновать	исследователей в конце первой четверти [Показать структуру]	subordinate	volnovat	NONPREF	AFFIRM	imperfective	no	nfin	dep_infinitive	vo	0	np	indef	anim	pl	acc
70	короткую анкету "Вчера, сегодня, завтра",	имея	в виду проблемы науки, ее достижения [Показать структуру]	subordinate	imet_v_vidu	NONPREF	AFFIRM	imperfective	no	nfin	converb	vo	2	np	indef	inanim	pl	nomacc
71		Продолжаем	публикацию ответов. [Показать структуру]		prodolzat	PREF	AFFIRM	imperfective	no	present	yes	vo	0	np	generic	inanim	sg	acc
72	В то же время	металловедение	можно рассматривать как составную часть [Показать структуру]	main	rassmatrivat	PREF	AFFIRM	imperfective	no	nfin	dep_infinitive	ov	1	np	generic	inanim	sg	nomacc
73	России, особенно для Урала, металлургия	представляет	собой одну из базовых отраслей [Показать структуру]		predstavljat	PREF	AFFIRM	imperfective	no	present	yes	vo	1	quant	indef	inanim	sg	acc
74	составляющей металлургии, поскольку позволяет существенно	улучшить	свойства сталей и других сплавов [Показать структуру]	subordinate	ulucsat	PREF	AFFIRM	perfective	no	nfin	dep_infinitive	vo	0	np	indef	inanim	pl	nomacc
75		Предлагаем	вниманию читателей фрагменты публичной лекции [Показать структуру]		predlagat	PREF	AFFIRM	imperfective	no	present	yes	vo	2	np	def	inanim	pl	nomacc
76	в XXI веке, вполне возможно,	изменят	до неузнаваемости то, как мы [Показать структуру]	main	izmenjat	PREF	AFFIRM	perfective	no	future	yes	vo	2	dem_pro	def	inanim	sg	nomacc
77	Новые технологии давно	определяют	развитие человечества, но мы продолжаем [Показать структуру]		opredeljat	PREF	AFFIRM	imperfective	no	present	yes	vo	0	np	generic	inanim	sg	nomacc
78	…Клетки мозга	накапливают	опыт, который приобретается от постоянного [Показать структуру]		nakaplivat	PREF	AFFIRM	imperfective	yes	present	yes	vo	0	np	generic	inanim	sg	nomacc
79	или предметы, которые со временем	приобретают	новые "ярлыки", дающие начало новым [Показать структуру]		priobretat	PREF	AFFIRM	imperfective	no	present	yes	vo	0	np	def	inanim	sg	nomacc
80	может воздействовать на ассоциативные связи,	меняет	и структуру мозга на клеточном [Показать структуру]		menjat	NONPREF	AFFIRM	imperfective	no	present	yes	vo	1	np	generic	inanim	sg	acc
81	института: у лондонских таксистов, постоянно "	прокручивающих	в мозгу" расположение и названия [Показать структуру]	subordinate	prokrucivat	PREF	AFFIRM	imperfective	yes	present	participle	vo	2	np	def	inanim	sg	nomacc
82	в таком "интерактивном" мире обязательно	окажет	воздействие на восприятие человеком окружающей [Показать структуру]		okazyvat	PREF	AFFIRM	perfective	no	future	yes	vo	0	np	generic	inanim	sg	nomacc
83	Миниатюрные устройства,	представляющие	собой объединение нейронов с электронными [Показать структуру]	subordinate	predstavljat	PREF	AFFIRM	imperfective	no	present	participle	vo	1	np	generic	inanim	sg	nomacc
84	Другие же устройства	скорректируют	все отклонения от нормы в [Показать структуру]	main	korrektirovat	PREF	AFFIRM	perfective	no	future	yes	vo	0	all	def	inanim	pl	nomacc
85		ПОДБИРАЮЩИЕ	ВЕТЕР [Показать структуру]	subordinate	podbirat	PREF	AFFIRM	imperfective	yes	present	participle	vo	0	np	def	inanim	sg	acc
86		Что	сделать, дабы жизнь не превратилась [Показать структуру]	main	delat	PREF	AFFIRM	perfective	no	nfin	infinitive	ov	0	inter_pro	indef	inanim	sg	nomacc
87		Ощутив	удары первых нефтяных кризисов в [Показать структуру]	subordinate	oscuscat	PREF	AFFIRM	perfective	no	nfin	converb	vo	0	np	def	inanim	pl	nomacc
88	Кстати, такие	агрегаты	можно нередко увидеть в эпизодах [Показать структуру]	main	videt	PREF	AFFIRM	perfective	no	nfin	dep_infinitive	ov	2	np	def	inanim	pl	acc
89	Так на рынке образовалась ниша,	которую	сегодня успешно занимают российские производители [Показать структуру]	subordinate	zanimat	PREF	AFFIRM	imperfective	no	present	yes	ov	2	relative_pro	def	inanim	sg	acc
90	высоких технологий оборонной промышленности и	содержит	набор оригинальных технических решений, которые [Показать структуру]		soderzat	PREF	AFFIRM	imperfective	no	present	yes	vo	0	np	def	inanim	sg	nomacc
91	Первый и самый очевидный вопрос:	что	делать, если ветра нет? [Показать структуру]	main	delat	NONPREF	AFFIRM	imperfective	no	nfin	infinitive	ov	0	inter_pro	indef	inanim	sg	acc
92		Зная	эти параметры, почти всегда можно [Показать структуру]	subordinate	znat	NONPREF	AFFIRM	imperfective	no	nfin	converb	vo	0	np	def	inanim	pl	nomacc
93	Разумеется, в идеале кроме аккумуляторов	комплекс	следует дополнить солнечными батареями: мы [Показать структуру]	main	dopolnjat	PREF	AFFIRM	perfective	no	nfin	dep_infinitive	ov	1	np	def	inanim	sg	nomacc
94	сомневаться, что ветроустановка способна надежно	снабжать	дом электричеством, не приходится. [Показать структуру]	subordinate	snabzat	NONPREF	AFFIRM	imperfective	no	nfin	dep_infinitive	vo	0	np	def	inanim	sg	nomacc
95	о разновидностях недемократии, о готовности	продать	России грузинский газопровод - с российским [Показать структуру]		prodavat	PREF	AFFIRM	perfective	no	nfin	infinitive	vo	1	np	def	inanim	sg	nomacc
96		Это	я говорю не в качестве комплимента [Показать структуру]	main	govorit	NONPREF	AFFIRM	imperfective	no	present	yes	ov	1	dem_pro	def	inanim	sg	nomacc
97	Не удалось существенно	облегчить	налоговое и учетное бремя для [Показать структуру]	main	oblegcjat	PREF	NEGAT	perfective	no	nfin	dep_infinitive	vo	0	np	def	inanim	sg	nomacc
98	быть сняты ограничения, и Россия	получит	одно из самых свободных регулирований [Показать структуру]		polucat	PREF	AFFIRM	perfective	no	future	yes	vo	0	quant	indef	inanim	sg	nomacc
99	Нельзя	ставить	дело зарабатывания денег как абсолютную [Показать структуру]	main	stavit	NONPREF	AFFIRM	imperfective	no	nfin	dep_infinitive	vo	0	np	generic	inanim	sg	nomacc
100	бизнес так устроен, что может	делать	деньги в любых условиях. [Показать структуру]	subordinate	delat	NONPREF	AFFIRM	imperfective	no	nfin	dep_infinitive	vo	0	np	generic	inanim	pl	nomacc
101	начинаешь понимать, что условия тоже	кое-что	означают. [Показать структуру]	subordinate	oznacat	PREF	AFFIRM	imperfective	yes	present	yes	ov	0	indef_pro	indef	inanim	sg	nomacc
102	Вот, скажем, люди, которые	зарабатывали	деньги во времена Шеварднадзе за счет [Показать структуру]		zarabatyvat	PREF	AFFIRM	imperfective	yes	past	yes	vo	0	np	generic	inanim	pl	nomacc
103	говорим о второй попытке, надо	вспомнить	тогдашний РСПП, союз людей, уже [Показать структуру]	main	vspominat	PREF	AFFIRM	perfective	no	nfin	dep_infinitive	vo	0	np	def	inanim	sg	nomacc
104	- Если вы	имеете	в виду то, что власть устроена [Показать структуру]	main	imet_v_vidu	NONPREF	AFFIRM	imperfective	no	present	yes	vo	2	dem_pro	def	inanim	sg	nomacc
105	Такое обследование позволяет врачам	обнаружить	сосудистую патологию, опухоли, инородные тела [Показать структуру]	main	obnaruzyvat	PREF	AFFIRM	perfective	no	nfin	dep_infinitive	vo	0	np	generic	inanim	sg	acc
106	ультразвуковой сканер, с помощью которого можно	получить	высококачественное изображение любого исследуемого участка [Показать структуру]	subordinate	polucat	PREF	AFFIRM	perfective	no	nfin	dep_infinitive	vo	0	np	generic	inanim	sg	nomacc
107		Его	разработали специалисты компании "АММ- 2000 [Показать структуру]		razrabatyvat	PREF	AFFIRM	perfective	no	past	yes	ov	0	pers_pro	def	inanim	sg	acc
108	диагностических исследований, но и позволит	проводить	внутрисосудистые операции, осуществлять до- и [Показать структуру]		provodit	PREF	AFFIRM	imperfective	no	nfin	dep_infinitive	vo	0	np	generic	inanim	pl	nomacc
109	Современные компьютерные методы позволяют	обрабатывать	параметры эхограммы и получать на [Показать структуру]	main	obrabatyvat	PREF	AFFIRM	imperfective	yes	nfin	dep_infinitive	vo	0	np	generic	inanim	pl	nomacc
110	Простота обработки результатов и дешевизна	делают	УЗИ- обследование незаменимым при диспансерных [Показать структуру]		delat	NONPREF	AFFIRM	imperfective	no	present	yes	vo	0	np	generic	inanim	sg	nomacc
111		УЗИ	применяют для обследования внутренних органов [Показать структуру]		primenjat	PREF	AFFIRM	imperfective	no	present	yes	ov	0	np	generic	inanim	sg	nomacc
112	черепной кости заметно затухают (впервые	это	установил в конце 50-х годов [Показать структуру]	main	ustanavlivat	PREF	AFFIRM	perfective	no	past	yes	ov	0	dem_pro	def	inanim	sg	nomacc
113	В результате	получить	контрастное изображение структур мозга через [Показать структуру]	main	polucat	PREF	AFFIRM	perfective	no	nfin	infinitive	vo	0	np	indef	inanim	sg	nomacc
114	дней существования в его мастерских	изготавливали	замечательные учебные пособия - действующие макеты [Показать структуру]		izgotavlivat	PREF	AFFIRM	imperfective	yes	past	yes	vo	0	np	indef	inanim	pl	nomacc
115	советские времена в Бауманском училище	готовили	специалистов для оборонных отраслей и [Показать структуру]		gotovit	NONPREF	AFFIRM	imperfective	no	past	yes	vo	0	np	indef	anim	pl	acc
116	Цель выставки -	познакомить	всех желающих с реликвиями, до сих пор [Показать структуру]	main	znakomit	PREF	AFFIRM	perfective	no	nfin	infinitive	vo	0	np	indef	anim	pl	acc
117	пеликана, когда ей не чем	кормить	детенышей, вырывает куски мяса из [Показать структуру]	subordinate	kormit	NONPREF	AFFIRM	imperfective	no	nfin	infinitive	vo	0	np	def	anim	pl	acc
118	фотографий смотрят лица тех, кто	закладывал	фундамент учебного процесса, известного сейчас [Показать структуру]		zakladyvat	PREF	AFFIRM	imperfective	yes	past	yes	vo	0	np	generic	inanim	sg	nomacc
119	Сейчас, когда с помощью компьютеров можно	разрабатывать	конструкции из деталей самой сложной [Показать структуру]	subordinate	razrabatyvat	PREF	AFFIRM	imperfective	yes	nfin	dep_infinitive	vo	0	np	generic	inanim	pl	nomacc
120	она была, сколько выдающихся специалистов	оттачивали	на ней свое инженерное мастерство [Показать структуру]		ottacivat	PREF	AFFIRM	imperfective	yes	past	yes	vo	2	np	def	inanim	sg	nomacc
121	американскими экспедициями, было достаточно, чтобы	обеспечить	научные лаборатории работой на несколько [Показать структуру]	subordinate	obespecivat	PREF	AFFIRM	perfective	no	nfin	infinitive	vo	0	np	indef	inanim	pl	nomacc
122	множество новых вопросов, и, чтобы	найти	на них ответ, нужны новые [Показать структуру]	subordinate	nahodit	PREF	AFFIRM	perfective	no	nfin	infinitive	vo	2	np	def	inanim	sg	nomacc
123	состоянии космических исследований в России,	выдвигал	аргументы в пользу возобновления лунной [Показать структуру]		vydvigat	PREF	AFFIRM	imperfective	no	past	yes	vo	0	np	def	inanim	pl	nomacc
124	Недавно объявлено о планах НАСА	совершить	к 2020 году серию пилотируемых [Показать структуру]	main	soversat	PREF	AFFIRM	perfective	no	nfin	dep_infinitive	vo	3	np	indef	inanim	sg	acc
125	российских миллионеров вошло в моду	дарить	лунные участки своим возлюбленным. [Показать структуру]	main	darit	NONPREF	AFFIRM	imperfective	no	nfin	infinitive	vo	0	np	indef	inanim	pl	nomacc
126	Впрочем,	проверить	это нелегко, так что настаивать не [Показать структуру]	main	proverjat	PREF	AFFIRM	perfective	no	nfin	infinitive	vo	0	dem_pro	def	inanim	sg	nomacc
127	Предполагается	построить	на Луне поселения, научные станции [Показать структуру]	main	stroit	PREF	AFFIRM	perfective	no	nfin	dep_infinitive	vo	2	np	indef	inanim	pl	nomacc
128	ресурсов сразу же, как только ученые	дадут	"добро". [Показать структуру]		davat	NONPREF	AFFIRM	perfective	no	future	yes	vo	0	np	generic	inanim	sg	nomacc
129	Не лучше ли те огромные	средства	, которые идут на космос, потратить [Показать структуру]	main	tratit	PREF	AFFIRM	perfective	no	nfin	infinitive	ov	4	np	def	inanim	pl	nomacc
130	"Лишние"	деньги	можно заставить работать на развитие [Показать структуру]	main	rabotat	NONPREF	AFFIRM	imperfective	no	nfin	dep_infinitive	ov	2	np	indef	inanim	pl	nomacc
131	пору - газ, нефть и алмазы	наполняют	российскую казну. [Показать структуру]		napolnjat	PREF	AFFIRM	imperfective	no	present	yes	vo	0	np	def	inanim	sg	acc
132	Колония	поставляет	в метрополию сырье, а вырученные [Показать структуру]		postavljat	PREF	AFFIRM	imperfective	yes	present	yes	vo	2	np	indef	inanim	sg	nomacc
133	СМИ и некоторые научные издания	пичкают	читателей и телезрителей всякой всячиной [Показать структуру]		pickat	NONPREF	AFFIRM	imperfective	no	present	yes	vo	0	np	indef	anim	pl	acc
134	было немного: Красноярский завод комбайнов,	выпускавший	чудовищные по качеству агрегаты, крупнейший [Показать структуру]	subordinate	vypuskat	PREF	AFFIRM	imperfective	yes	past	participle	vo	0	np	indef	inanim	pl	nomacc
135	начали было осуществляться программы, призванные	сделать	ее экономически самодостаточной, - пошли кое-какие [Показать структуру]		delat	PREF	AFFIRM	perfective	no	nfin	dep_infinitive	vo	0	pers_pro	def	inanim	sg	acc
136	все делалось по-советски, то есть полностью	игнорируя	возможности и потребности осваиваемых территорий [Показать структуру]	subordinate	ignorirovat	NONPREF	AFFIRM	imperfective	no	nfin	converb	vo	0	np	def	inanim	pl	nomacc
137	Правда, теперь рыночные механизмы ярко	высвечивают	все уродство развития самого богатого [Показать структуру]		vysvecivat	PREF	AFFIRM	imperfective	yes	present	yes	vo	0	np	def	inanim	sg	nomacc
138	транспортная: советская индустриализация очень слабо	затронула	инфраструктуру Сибири. [Показать структуру]		zatragivat	PREF	AFFIRM	perfective	no	past	yes	vo	0	np	def	inanim	sg	acc
139	масштабная и страшно дорогая операция,	которую	невозможно очистить от коррупции и [Показать структуру]	subordinate	ociscat	PREF	AFFIRM	perfective	no	nfin	dep_infinitive	ov	1	relative_pro	def	inanim	sg	acc
140	Она	представляет	собой дисплей и мультимедиа-проектор, на [Показать структуру]		predstavljat	PREF	AFFIRM	imperfective	no	present	yes	vo	1	np	indef	inanim	sg	nomacc
141	С помощью такой доски лектор может	продемонстрировать	студентам графики, диаграммы, карты, таблицы [Показать структуру]	main	demonstrirovat	PREF	AFFIRM	perfective	no	nfin	dep_infinitive	vo	1	np	indef	inanim	pl	nomacc
142	Некоторые модели проекционного оборудования	предусматривают	вывод учебных материалов на экран [Показать структуру]		predusmatrivat	PREF	AFFIRM	imperfective	yes	present	yes	vo	0	np	generic	inanim	sg	nomacc
143	может "фломастером" или просто пальцем	сделать	на доске надписи, подчеркнуть или [Показать структуру]		delat	PREF	AFFIRM	perfective	no	nfin	dep_infinitive	vo	2	np	indef	inanim	pl	nomacc
144		Цвет	"чернил" и толщину линий лектор выбирает по собственному усмотрению. [Показать структуру]		vybirat	PREF	AFFIRM	imperfective	yes	present	yes	ov	2	np	generic	inanim	sg	acc
145	того, специальное программное обеспечение позволяет	преобразовать	текст, написанный на интерактивной доске [Показать структуру]		preobrazovyvat	PREF	AFFIRM	perfective	no	nfin	dep_infinitive	vo	0	np	generic	inanim	sg	nomacc
146	Но как же доска "	чувствует	" перемещения фломастера или пальца преподавателя [Показать структуру]		cuvstvovat	NONPREF	AFFIRM	imperfective	no	present	yes	vo	0	np	indef	inanim	pl	nomacc
147		Рассмотрим	два типа интерактивных досок. [Показать структуру]		rassmatrivat	PREF	AFFIRM	perfective	no	future	yes	vo	0	quant	indef	inanim	pl	nomacc
148	разрешение (2000 * 2000 точек) полностью "	покрывает	" любые современные мониторы и проекторы [Показать структуру]		pokryvat	PREF	AFFIRM	imperfective	yes	present	yes	vo	0	np	indef	inanim	pl	nomacc
149	что очень удобно: докладчик не	отбрасывает	тень на экран, а яркий [Показать структуру]		otbrasyvat	PREF	NEGAT	imperfective	yes	present	yes	vo	0	np	generic	inanim	sg	nomacc
150	Когда Москве	нечего	сказать ближним соседям, в ход [Показать структуру]	main	govorit	PREF	NEGAT	perfective	no	nfin	infinitive	ov	0	neg_pro	indef	inanim	sg	gen
151	врач России Геннадий Онищенко предписал	запретить	ввоз в Россию вин из [Показать структуру]		zaprescat	PREF	AFFIRM	perfective	no	nfin	dep_infinitive	vo	0	np	indef	inanim	sg	nomacc
152	Затем Онищенко	нанес	новый удар: вечером 9 апреля [Показать структуру]		nanosit	PREF	AFFIRM	perfective	no	past	yes	vo	0	np	indef	inanim	sg	nomacc
153		Обратите	внимание на даты и время [Показать структуру]		obrascat	PREF	AFFIRM	perfective	no	imperative	yes	vo	0	np	generic	inanim	sg	acc
154	А затем	запретили	и "Боржоми" - опять в уик-энд [Показать структуру]	main	zaprescat	PREF	AFFIRM	perfective	no	past	yes	vo	1	name	def	inanim	sg	nomacc
155	санитар страны работает без выходных,	отражая	винную агрессию, хотя обычно куда [Показать структуру]	subordinate	otrazat	PREF	AFFIRM	imperfective	no	nfin	converb	vo	0	np	def	inanim	sg	acc
156		Что	санитары нашли в вине? [Показать структуру]	main	nahodit	PREF	AFFIRM	perfective	no	past	yes	ov	0	inter_pro	indef	inanim	sg	nomacc
157	потому, что в нем уже	нашли	конкретные гадости, а лишь потому [Показать структуру]		nahodit	PREF	AFFIRM	perfective	no	past	yes	vo	0	np	indef	inanim	pl	nomacc
158	В следующем послании Онищенко постарается	учесть	проколы и на агентурные данные [Показать структуру]	main	ucityvat	PREF	AFFIRM	perfective	no	nfin	dep_infinitive	vo	0	np	def	inanim	pl	nomacc
159	при этом официально главный санитар	упомянет	только два своих территориальных управления [Показать структуру]		upominat	PREF	AFFIRM	perfective	no	future	yes	vo	1	quant	indef	inanim	pl	nomacc
160	Я ПЫТАЮСЬ	ПРИБЛИЗИТЬ	НАУКУ К ЛЮДЯМ [Показать структуру]	main	priblizat	PREF	AFFIRM	perfective	no	nfin	dep_infinitive	vo	0	np	indef	inanim	sg	acc
161	В Оксфорде она	возглавляет	междисциплинарную группу ученых, исследующих механизмы [Показать структуру]		vozglavljat	PREF	AFFIRM	imperfective	no	present	yes	vo	0	np	def	inanim	sg	acc
162	книге "Путешествие в центры сознания"	изложила	свою теорию сознания, а затем [Показать структуру]		izlagat	PREF	AFFIRM	perfective	no	past	yes	vo	0	np	def	inanim	sg	acc
163	Обе книги	вызвали	большой интерес у специалистов и [Показать структуру]		vyzyvat	PREF	AFFIRM	perfective	no	past	yes	vo	0	np	generic	inanim	sg	nomacc
164	о том, как достижения науки	изменяют	жизнь человека, о взаимоотношениях науки [Показать структуру]		izmenjat	PREF	AFFIRM	imperfective	no	present	yes	vo	0	np	generic	inanim	sg	nomacc
165	в России профессор С. Гринфилд	дала	интервью собственному корреспонденту журнала "Наука [Показать структуру]		davat	NONPREF	AFFIRM	perfective	no	past	yes	vo	0	np	generic	inanim	sg	nomacc
166	Мы пытаемся	понять	механизмы дегенерации нервных клеток головного [Показать структуру]	main	ponimat	PREF	AFFIRM	perfective	no	nfin	dep_infinitive	vo	0	np	def	inanim	pl	nomacc
167	информационных технологий и биотехнологии способны	изменить	работу мозга. [Показать структуру]		izmenjat	PREF	AFFIRM	perfective	no	nfin	dep_infinitive	vo	0	np	generic	inanim	sg	acc
168	более важны цепочки нейронов, которые	образуют	сложные разветвленные структуры. [Показать структуру]		obrazovyvat	PREF	AFFIRM	imperfective	no	present	yes	vo	0	np	indef	inanim	pl	nomacc
169	оркестре: в данный момент она	выполняет	свои функции в зависимости от [Показать структуру]		vypolnjat	PREF	AFFIRM	imperfective	no	present	yes	vo	0	np	def	inanim	pl	nomacc
170	спорить, кем он естественнее всего	себя	чувствует - академическим ученым, негласным экспертом [Показать структуру]		cuvstvovat	NONPREF	AFFIRM	imperfective	no	present	yes	ov	0	refl_pro	def	anim	sg	acc
171	юбилейная статья не может, увы,	иметь	какого-либо мемуарного оттенка. [Показать структуру]		imet	NONPREF	NEGAT	imperfective	no	nfin	dep_infinitive	vo	0	np	indef	inanim	sg	gen
172	То есть иногда	его	интервьюировал, а также видел и слышал [Показать структуру]		intervjuirovat	NONPREF	AFFIRM	imperfective	no	past	yes	ov	0	pers_pro	def	anim	sg	acc
173	сентября 1993 года, когда Ельцин	назначил	Гайдара первым вице-премьером, а вслед [Показать структуру]	subordinate	naznacat	PREF	AFFIRM	perfective	no	past	yes	vo	0	name	def	anim	sg	acc
174	В эти дни я и	подловил	Гайдара в коридоре в слабой [Показать структуру]	main	podlavlivat	PREF	AFFIRM	perfective	no	past	yes	vo	0	name	def	anim	sg	acc
175	Вежливые ответы почти	ничего	в себе не содержали. [Показать структуру]	main	soderzat	PREF	NEGAT	imperfective	no	past	yes	ov	1	neg_pro	indef	inanim	sg	gen
176	Похоже, он	предвидел	то, что вскоре предстояло. [Показать структуру]	main	predvidet	PREF	AFFIRM	perfective	no	past	yes	vo	0	dem_pro	def	inanim	sg	nomacc
177	Потом, когда началась стрельба, он	вел	себя решительнее и храбрее, чем [Показать структуру]		vesti	NONPREF	AFFIRM	imperfective	no	past	yes	vo	0	refl_pro	def	anim	sg	acc
178	правительством, даже если бы и	видел	в этом исполнение общественного долга [Показать структуру]		videt	NONPREF	AFFIRM	imperfective	no	past	yes	vo	2	np	generic	inanim	sg	nomacc
179	него ниже той планки, которая	обозначает	предрасположенность к политической карьере. [Показать структуру]		oboznacat	PREF	AFFIRM	imperfective	yes	present	yes	vo	0	np	generic	inanim	sg	nomacc
180	В русско- грузинских компаниях он	имеет	особый успех. [Показать структуру]		imet	NONPREF	AFFIRM	imperfective	no	present	yes	vo	0	np	generic	inanim	sg	nomacc
181	живут по правую сторону Куры,	оставили	газ, тем, кто по [Показать структуру]		ostavljat	PREF	AFFIRM	perfective	no	past	yes	vo	0	np	def	inanim	sg	nomacc
182	с теплом, с запоздалым воодушевлением	опровергали	репортажи о километровых очередях. [Показать структуру]		oprovergat	PREF	AFFIRM	imperfective	no	past	yes	vo	0	np	indef	inanim	pl	nomacc
183	кто в морозные дни лично	проходил	десятки километров в поисках того [Показать структуру]		prohodit	PREF	AFFIRM	imperfective	no	past	yes	vo	0	np	indef	inanim	pl	nomacc
184	"А	что	, собственно, пиарить?" - нерешительно вступал в [Показать структуру]	main	piarit	NONPREF	AFFIRM	imperfective	no	nfin	infinitive	ov	1	inter_pro	indef	inanim	sg	nomacc
185	Да	что	тут говорить - конечно, диверсия. [Показать структуру]	main	govorit	NONPREF	AFFIRM	imperfective	no	nfin	infinitive	ov	1	inter_pro	indef	inanim	sg	nomacc
186	То российские миротворцы не	пропустят	грузинских к месту дислокации, на [Показать структуру]		propuskat	PREF	NEGAT	perfective	no	future	yes	vo	0	np	indef	anim	pl	acc
187	как слои в вафлях, так что	заблокировать	здесь может кто угодно кого [Показать структуру]	subordinate	blokirovat	PREF	AFFIRM	perfective	no	nfin	dep_infinitive	vo	4	indef_pro	indef	anim	sg	acc
188	Итоги	визита можно резюмировать так: Москва [Показать структуру]		main	rezjumirovat	NONPREF	AFFIRM	perfective	no	nfin	dep_infinitive	ov	2	np	def	inanim	pl	nomacc
189	на выборах в Палестинской автономии,	вызвал	довольно сильные эмоции в мире [Показать структуру]		vyzyvat	PREF	AFFIRM	perfective	no	past	yes	vo	1	np	indef	inanim	pl	nomacc
190	а тут на официальном уровне	приглашают	"духовных братьев" Шамиля Басаева! [Показать структуру]		priglasat	PREF	AFFIRM	imperfective	no	present	yes	vo	0	np	def	anim	pl	acc
191	звучали встревоженные голоса: в Москву	приглашают	лидеров организации, которая в большинстве [Показать структуру]		priglasat	PREF	AFFIRM	imperfective	no	present	yes	vo	0	np	def	anim	pl	acc
192	израильский премьер Эхуд Ольмерт, сначала	назвавший	приглашение руководства ХАМАС "ножом в [Показать структуру]	subordinate	nazyvat	PREF	AFFIRM	perfective	no	past	participle	vo	0	np	def	inanim	sg	nomacc
193	Кондолиза Райс также открыто	поддержала	приглашение палестинских радикалов в Москву [Показать структуру]		podderzivat	PREF	AFFIRM	perfective	no	past	yes	vo	0	np	def	inanim	sg	nomacc
194	Москва до последнего	поддерживала	почти распавшуюся ООП и ее [Показать структуру]		podderzivat	PREF	AFFIRM	imperfective	yes	past	yes	vo	1	np	def	inanim	sg	acc
195	на выборах победил ХАМАС, он	получил	приглашение в Москву - в первую очередь для [Показать структуру]		polucat	PREF	AFFIRM	perfective	no	past	yes	vo	0	np	indef	inanim	sg	acc
196	Хотя нельзя	исключать	и мотивы этакой легкой мести [Показать структуру]	main	isklucat	PREF	AFFIRM	imperfective	no	nfin	dep_infinitive	vo	1	np	def	inanim	pl	nomacc
197	Москвы есть, а чтобы продолжать	продавать	мусульманским странам партии вооружений, дружить [Показать структуру]	subordinate	prodavat	PREF	AFFIRM	imperfective	no	nfin	dep_infinitive	vo	2	np	indef	inanim	pl	acc
198		Спроси	россиянина о "московских петербуржцах", и [Показать структуру]		sprasivat	PREF	AFFIRM	perfective	no	imperative	yes	vo	0	np	indef	anim	sg	acc
199	А если россиянин - москвич, так	добавит	еще и разные крепкие слова [Показать структуру]		dobavljat	PREF	AFFIRM	perfective	no	future	yes	vo	2	np	indef	inanim	pl	nomacc
200	А вот	что	россиянин сказал бы сегодня о [Показать структуру]	main	govorit	PREF	AFFIRM	perfective	no	subjunctive	yes	ov	1	inter_pro	indef	inanim	sg	nomacc
201	последние лет шесть или семь	заполучил	такие привилегии, которых не видывал [Показать структуру]		zapolucat	PREF	AFFIRM	perfective	no	past	yes	vo	0	np	indef	inanim	pl	nomacc
202	родина президента порцию за порцией	откусывает	у столицы законные ее права [Показать структуру]		otkusyvat	PREF	AFFIRM	imperfective	yes	present	yes	vo	2	np	def	inanim	pl	nomacc
203	И	выразит	надежду, что переварить их она [Показать структуру]		vyrazat	PREF	AFFIRM	perfective	no	future	yes	vo	0	np	generic	inanim	sg	acc
204	Я	имею	в виду, конечно, избранность материальную и [Показать структуру]		imet	NONPREF	AFFIRM	imperfective	no	present	yes	vo	3	np	generic	inanim	sg	nomacc
205	пошла в рост и готовность	взять	на себя кое-какие столичные обязанности [Показать структуру]		brat	PREF	AFFIRM	perfective	no	nfin	dep_infinitive	vo	2	np	indef	inanim	pl	nomacc
206	и растущая гордость собою, кажется,	порождают	новую генерацию комплексов, совсем не [Показать структуру]		porozdat	PREF	AFFIRM	imperfective	no	present	yes	vo	0	np	indef	inanim	sg	acc
207	года, "коварные демоны" вновь попытаются	похитить	у людей Солнце. [Показать структуру]		pohiscat	PREF	AFFIRM	perfective	no	nfin	dep_infinitive	vo	2	np	def	inanim	sg	nomacc
208	Жители Земли	наблюдают	его многие тысячи лет и [Показать структуру]		nabludat	PREF	AFFIRM	imperfective	no	present	yes	vo	0	pers_pro	def	anim	sg	acc
209	все же даже современный образованный человек	испытывает	некий суеверный трепет, когда на [Показать структуру]		ispytyvat	PREF	AFFIRM	imperfective	yes	present	yes	vo	0	np	indef	inanim	sg	nomacc
210	правило, так: светозарный бог Солнца	ведет	борьбу с темными, злыми потусторонними [Показать структуру]		vesti	NONPREF	AFFIRM	imperfective	no	present	yes	vo	0	np	generic	inanim	sg	acc
211	И чтобы помочь Солнцу	победить	страшную черную тень, поедающую его [Показать структуру]	main	pobezdat	PREF	AFFIRM	perfective	no	nfin	dep_infinitive	vo	0	np	def	inanim	sg	acc
212		Поднимали	шум, гвалт, колотили в барабаны [Показать структуру]		podnimat	PREF	AFFIRM	imperfective	no	past	yes	vo	0	np	generic	inanim	sg	nomacc
213	времени оказывается на одной прямой,	соединяющей	Солнце, Луну и Землю (между [Показать структуру]	subordinate	sojedinjat	PREF	AFFIRM	imperfective	no	present	participle	vo	0	np	def	inanim	sg	nomacc
214	иногда частично, а иногда полностью	заслоняет	Солнце, на Землю падает лунная [Показать структуру]		zaslonjat	PREF	AFFIRM	imperfective	no	present	yes	vo	0	np	def	inanim	sg	nomacc
215	попадает на поверхность Земли, она	представляет	собой не точку, а сравнительно [Показать структуру]		predstavljat	PREF	AFFIRM	imperfective	no	present	yes	vo	2	np	generic	inanim	sg	acc
216	нашей планеты и как бы	прочерчивает	на ней линию, которую называют [Показать структуру]		procercivat	PREF	AFFIRM	imperfective	yes	subjunctive	yes	vo	2	np	indef	inanim	sg	acc
217	Россия	переживает	весьма острый период своего развития [Показать структуру]		perezivat	PREF	AFFIRM	imperfective	yes	present	yes	vo	1	np	indef	inanim	sg	nomacc
218	Высшими политическими приоритетами нынешний режим	провозгласил	порядок и стабильность. [Показать структуру]		provozglasat	PREF	AFFIRM	perfective	no	past	yes	vo	0	np	generic	inanim	sg	nomacc
219	Поначалу такую упорядоченную	стабильность	именовали "управляемой демократией", теперь - [Показать структуру]		imenovat	NONPREF	AFFIRM	imperfective	no	past	yes	ov	0	np	generic	inanim	sg	nomacc
220	Эти нехитрые риторические обороты	значат	примерно то же, что в [Показать структуру]	main	znacit	NONPREF	AFFIRM	imperfective	no	present	yes	vo	1	dem_pro	def	inanim	sg	nomacc
221	Теперь они беспрепятственно	завершают	строительство - во-первых, максимально централизованной власти [Показать структуру]		zaversat	PREF	AFFIRM	imperfective	no	present	yes	vo	0	np	generic	inanim	sg	nomacc
222	Кстати, и кажущуюся	смену	власти удобно оборудовать по-прежнему, как [Показать структуру]	main	oborudovat	PREF	AFFIRM	perfective	no	nfin	dep_infinitive	ov	2	np	generic	inanim	sg	acc
223	Увы,	имитировать	демократические процедуры оказалось несложно. [Показать структуру]	main	imitirovat	NONPREF	AFFIRM	imperfective	no	nfin	dep_infinitive	vo	0	np	indef	inanim	pl	nomacc
224	Что ж, посмотрим,	что	мы имеем, как говорится, на [Показать структуру]	subordinate	imet	NONPREF	AFFIRM	imperfective	no	present	yes	ov	1	inter_pro	indef	inanim	sg	nomacc
225		То	, что принято называть "ныне действующей [Показать структуру]	subordinate	nazyvat	PREF	AFFIRM	imperfective	yes	nfin	dep_infinitive	ov	1	relative_pro	def	inanim	sg	nomacc
226	Президент Путин	подписал	указ "О мерах по противодействию [Показать структуру]		podpisyvat	PREF	AFFIRM	perfective	no	past	yes	vo	0	np	def	inanim	sg	nomacc
227	антитеррористический комитет (НАК) "является органом,	обеспечивающим	координацию деятельности федеральных органов исполнительной [Показать структуру]	subordinate	obespecivat	PREF	AFFIRM	imperfective	yes	present	participle	vo	0	np	generic	inanim	sg	acc
228	Боюсь, что	утомил	читателей нудным перечислением чиновной номенклатуры [Показать структуру]		utomljat	PREF	AFFIRM	perfective	no	past	yes	vo	0	np	def	anim	pl	acc
229	ее же структуры, потому центральный	аппарат	Лубянки расширят еще на 300 [Показать структуру]		rassirjat	PREF	AFFIRM	perfective	no	future	yes	ov	1	np	def	inanim	sg	nomacc
230	же система и вовсе не	имеет	прецедентов: когда и где шеф [Показать структуру]		imet	NONPREF	NEGAT	imperfective	no	present	yes	vo	0	np	indef	inanim	pl	gen
231	Такого	сосредоточения	власти страна не ведала даже [Показать структуру]		vedat	NONPREF	NEGAT	imperfective	no	past	yes	ov	2	np	def	inanim	sg	gen
232	компетенции формально- юридически просто тотальные -	читайте	законы "Об органах ФСБ РФ [Показать структуру]		citat	NONPREF	AFFIRM	imperfective	no	imperative	yes	vo	0	np	def	inanim	pl	nomacc
233	К чему, скажем,	создавать	такие штабы на Чукотке, Камчатке [Показать структуру]	main	sozdavat	PREF	AFFIRM	imperfective	no	nfin	infinitive	vo	0	np	def	inanim	pl	nomacc
234	Если неспособны, то	их	надо просто разгонять, а не [Показать структуру]		razgonjat	PREF	AFFIRM	imperfective	yes	nfin	dep_infinitive	ov	2	pers_pro	def	anim	pl	acc
235	России той волны терроризма, которая	оправдывала	бы наделение ФСБ спецвластью! [Показать структуру]		opravdyvat	PREF	AFFIRM	imperfective	yes	subjunctive	yes	vo	0	np	generic	inanim	sg	nomacc
236	Газеты	расшифровывают	смысл его основополагающих статей, сравнивая [Показать структуру]		rassifrovyvat	PREF	AFFIRM	imperfective	yes	present	yes	vo	0	np	def	inanim	sg	nomacc
237	внимания к культуре, обороне, армии… -	продолжайте	перечень в любой последовательности. [Показать структуру]		prodolzat	PREF	AFFIRM	imperfective	no	imperative	yes	vo	0	np	def	inanim	sg	nomacc
238	Конформисты принимаются	разоблачать	"выскочек", уличая их в передергивании [Показать структуру]	main	razoblacat	PREF	AFFIRM	imperfective	no	nfin	dep_infinitive	vo	0	np	generic	anim	pl	acc
239	в похожих ситуациях наши предки	искали	заветную страну профицита? [Показать структуру]		iskat	NONPREF	AFFIRM	imperfective	no	past	yes	vo	0	np	indef	inanim	sg	acc
240	Государственным финансам в свое время	придавала	немалое значение сама Екатерина Великая [Показать структуру]		pridavat	PREF	AFFIRM	imperfective	no	past	yes	vo	0	np	generic	inanim	sg	nomacc
241	ее смерти в списках стали	распространять	мемуары царицы. [Показать структуру]		rasprostranat	PREF	AFFIRM	imperfective	no	nfin	dep_infinitive	vo	0	np	def	inanim	pl	nomacc
242	Эти	записки	читали Карамзин и Пушкин, за [Показать структуру]		citat	NONPREF	AFFIRM	imperfective	no	past	yes	ov	0	np	def	inanim	pl	nomacc
243	Мемуары Екатерины II и сегодня	дают	немалую пищу ослабевшему уму. [Показать структуру]		davat	NONPREF	AFFIRM	imperfective	no	present	yes	vo	0	np	generic	inanim	pl	acc
244	ей после прихода к власти	улаживать	финансовую ситуацию в государстве. [Показать структуру]		ulazivat	PREF	AFFIRM	imperfective	no	nfin	dep_infinitive	vo	0	np	def	inanim	sg	acc
245	и, представьте, как-то жила, не	получая	восемь месяцев жалованья! [Показать структуру]	subordinate	polucat	PREF	NEGAT	imperfective	no	nfin	converb	vo	2	np	indef	inanim	sg	gen
246	Государственной Третьяковской галереи Андрею Ерофееву	предъявили	обвинение по печально знаменитой статье [Показать структуру]		predjavljat	PREF	AFFIRM	perfective	no	past	yes	vo	0	np	def	inanim	sg	nomacc
247		Его	обвиняют в разжигании религиозной розни [Показать структуру]		obvinat	PREF	AFFIRM	imperfective	yes	present	yes	ov	0	pers_pro	def	anim	sg	acc
248	С Ерофеева	взяли	подписку о невыезде. [Показать структуру]		brat	NONPREF	AFFIRM	perfective	no	past	yes	vo	0	np	generic	inanim	sg	acc
249	немедленно подъехали старые "Жигули" и,	зацепив	его передним бампером, стали изображать [Показать структуру]	subordinate	zacepljat	PREF	AFFIRM	perfective	no	nfin	converb	vo	0	pers_pro	def	anim	sg	acc
250	грузовичка на середину улицы и	устроила	целое представление, скандируя лозунги против [Показать структуру]		ustraivat	PREF	AFFIRM	perfective	no	past	yes	vo	0	np	indef	inanim	sg	nomacc
251	Свою	поддержку	преследуемому художнику высказывали энтузиасты из [Показать структуру]		vyskazyvat	PREF	AFFIRM	imperfective	no	past	yes	ov	2	np	def	inanim	sg	acc
252	машина ДПС, но уже не	нашла	никаких нарушителей правил дорожного движения [Показать структуру]		nahodit	PREF	NEGAT	perfective	no	past	yes	vo	0	np	indef	anim	pl	gen
253	в том же самом месте	предъявили	точно такое же обвинение. [Показать структуру]		predjavljat	PREF	AFFIRM	perfective	no	past	yes	vo	1	np	indef	inanim	sg	nomacc
254	"Запретным" это	искусство	назвали потому, что представленные на [Показать структуру]		nazyvat	PREF	AFFIRM	perfective	no	past	yes	ov	0	np	def	inanim	sg	nomacc
255	До сих пор	возможность	нулевого притока капитала в Россию допускали только эксперты [Показать структуру]		dopuskat	PREF	AFFIRM	imperfective	no	past	yes	ov	4	np	def	inanim	sg	nomacc
256	полномасштабного экономического кризиса государству нужно	обратить	внимание на реальную экономику, полагают [Показать структуру]		obrascat	PREF	AFFIRM	perfective	no	nfin	dep_infinitive	vo	0	np	generic	inanim	sg	nomacc
257	экономика, надстройка, которая формально не	имеет	прямого отношения к реальному сектору [Показать структуру]		imet	NONPREF	NEGAT	imperfective	no	present	yes	vo	0	np	indef	inanim	sg	gen
258	на "финансовом тотализаторе": там можно	получить	быстрые и относительно дешевые инвестиции [Показать структуру]		polucat	PREF	AFFIRM	perfective	no	nfin	dep_infinitive	vo	0	np	indef	inanim	pl	nomacc
259	Реальный сектор уже	почувствовал	нехватку средств для инвестиций в [Показать структуру]		cuvstvovat	PREF	AFFIRM	perfective	no	past	yes	vo	0	np	generic	inanim	sg	acc
260	Эти фундаментальные факторы	претерпели	значительные корректировки", - считает Елена Матросова [Показать структуру]		preterpevat	PREF	AFFIRM	perfective	no	past	yes	vo	0	np	indef	inanim	pl	nomacc
261	- Но инвестиционные	приоритеты	их использования нужно немного подправить [Показать структуру]		podpravljat	PREF	AFFIRM	perfective	no	nfin	dep_infinitive	ov	4	np	def	inanim	pl	nomacc
262	В первую очередь, по ее мнению, нужно	поддержать	строительную индустрию, что вполне реально [Показать структуру]	main	podderzivat	PREF	AFFIRM	perfective	no	nfin	dep_infinitive	vo	0	np	def	inanim	sg	acc
263	"Нужно	запустить	механизмы - Инвестиционный фонд, ЖКХ, особые [Показать структуру]	main	zapuskat	PREF	AFFIRM	perfective	no	nfin	dep_infinitive	vo	0	np	def	inanim	pl	nomacc
264	Государство должно	компенсировать	выпадение инвестиций. [Показать структуру]	main	kompensirovat	NONPREF	AFFIRM	imperfective	no	nfin	dep_infinitive	vo	0	np	generic	inanim	sg	nomacc
265	раза, а средняя продолжительность жизни	составит	75 лет. [Показать структуру]		sostavljat	PREF	AFFIRM	perfective	no	future	yes	vo	0	quant	indef	inanim	pl	nomacc
266		Открывая	совещание, Владимир Путин отметил, что [Показать структуру]	subordinate	otkryvat	PREF	AFFIRM	imperfective	no	nfin	converb	vo	0	np	def	inanim	sg	nomacc
267	Путин особо	обратил	внимание участников совещания на то [Показать структуру]		obrascat	PREF	AFFIRM	perfective	no	past	yes	vo	0	np	def	inanim	sg	nomacc
268	и следующие два года должен	составить	11- 12 % ежегодно, что [Показать структуру]		sostavljat	PREF	AFFIRM	perfective	no	nfin	dep_infinitive	vo	0	quant	indef	inanim	pl	acc
269	не совсем понятно, чья позиция	возьмет	верх. [Показать структуру]		brat	NONPREF	AFFIRM	perfective	no	future	yes	vo	0	np	generic	inanim	sg	nomacc
270	Энергомонополист - РАО "ЕЭС" -	прекратил	свое существование, и в этой [Показать структуру]		prekrascat	PREF	AFFIRM	perfective	no	past	yes	vo	0	np	def	inanim	sg	nomacc
271	на 2020 год Николаев не	видит	ничего нереалистичного, в частности, что касается [Показать структуру]		videt	NONPREF	NEGAT	imperfective	no	present	yes	vo	0	neg_pro	indef	inanim	sg	gen
272	2020 году теоретически возможно резко	улучшить	уровень жизни людей и эффективность [Показать структуру]	main	ulucsat	PREF	AFFIRM	perfective	no	nfin	dep_infinitive	vo	0	np	def	inanim	sg	nomacc
273	Инновационная экономика других стран	задействовала	для решения этой проблемы новейшие нанотехнологии [Показать структуру]		zadejstvovat	PREF	AFFIRM	perfective	no	past	yes	vo	4	np	indef	inanim	pl	nomacc
274	И там уже	кладут	не асфальт, а некую субстанцию [Показать структуру]		klast	NONPREF	AFFIRM	imperfective	no	present	yes	vo	1	np	generic	inanim	sg	nomacc
275	Можно, конечно,	добывать	море нефти, делать асфальт и [Показать структуру]	main	dobyvat	PREF	AFFIRM	imperfective	no	nfin	dep_infinitive	vo	0	np	indef	inanim	sg	nomacc
276	А можно один раз	создать	нанопродукт и ни о чем [Показать структуру]	main	sozdavat	PREF	AFFIRM	perfective	no	nfin	dep_infinitive	vo	0	np	indef	inanim	sg	nomacc
277	Или	применить	технологии, которые превратят нефть в [Показать структуру]	main	primenjat	PREF	AFFIRM	perfective	no	nfin	infinitive	vo	0	np	indef	inanim	pl	nomacc
278	Или вообще	заменить	нефть новым энергосберегающим продуктом, перейти [Показать структуру]	main	zamenjat	PREF	AFFIRM	perfective	no	nfin	infinitive	vo	0	np	generic	inanim	sg	nomacc
279	экономика знаний, которая в будущем	победит	сырьевую. [Показать структуру]		pobezdat	PREF	AFFIRM	perfective	no	future	yes	vo	0	np	def	inanim	sg	acc
280	В 2005 году экспорт технологий	принес	стране 389 миллионов долларов. [Показать структуру]		prinosit	PREF	AFFIRM	perfective	no	past	yes	vo	1	quant	indef	inanim	pl	nomacc
281	Чиновники убеждены, что эта мера	сдержит	в узде стоимость народной продовольственной [Показать структуру]		sderzivat	PREF	AFFIRM	perfective	no	future	yes	vo	1	np	def	inanim	sg	nomacc
282	Но люди наблюдательные	разбивают	в пух и прах все надежды правительства. [Показать структуру]		razbivat	PREF	AFFIRM	imperfective	yes	present	yes	vo	4	np	def	inanim	pl	nomacc
283	Олег АНТОНОВ с начала года	собирал	чеки после покупок в одном [Показать структуру]		sobirat	PREF	AFFIRM	imperfective	yes	past	yes	vo	0	np	def	inanim	pl	nomacc
284		Семью	Олега Антонова трудно удивить высокими [Показать структуру]	main	udivljat	PREF	AFFIRM	perfective	no	nfin	dep_infinitive	ov	3	np	def	anim	sg	acc
285	Но осенью 2007 года супруга	взяла	Олега Ивановича под руку и [Показать структуру]	main	brat	NONPREF	AFFIRM	perfective	no	past	yes	vo	0	name	def	anim	sg	acc
286	наш читатель решил, как говорится,	поймать	чиновников, обещавших прекратить рост цен [Показать структуру]		lovit	PREF	AFFIRM	perfective	no	nfin	dep_infinitive	vo	0	np	def	anim	pl	acc
287	И начал	откладывать	чеки из продовольственного магазина в [Показать структуру]	main	otkladyvat	PREF	AFFIRM	imperfective	yes	nfin	dep_infinitive	vo	0	np	def	inanim	pl	nomacc
288	В ручном режиме	регулировать	цены пытаются не только в [Показать структуру]	main	regulirovat	NONPREF	AFFIRM	imperfective	no	nfin	dep_infinitive	vo	0	np	generic	inanim	pl	nomacc
289	на 3- 5 % необходимо	получить	добро местных властей. [Показать структуру]		polucat	PREF	AFFIRM	perfective	no	nfin	dep_infinitive	vo	0	np	def	inanim	sg	nomacc
290	Но	получить	такую санкцию практически невозможно. [Показать структуру]	main	polucat	PREF	AFFIRM	perfective	no	nfin	dep_infinitive	vo	0	np	def	inanim	sg	acc
291	Либералы с гневом	отвергают	идею "особой цивилизации" как "тысячелетнего [Показать структуру]		otvergat	PREF	AFFIRM	imperfective	no	present	yes	vo	0	np	def	inanim	sg	acc
292	хотят знать о реальных тенденциях,	характеризующих	динамику национальной культуры, повторяя, как [Показать структуру]	subordinate	harakterizovat	NONPREF	AFFIRM	imperfective	no	present	participle	vo	0	np	def	inanim	sg	acc
293	метафорами, поэтическими образами, а какой	механизм	они описывают, нам не объясняется [Показать структуру]		opisyvat	PREF	AFFIRM	imperfective	yes	present	yes	ov	1	np	indef	inanim	sg	nomacc
294	И	роль	науки я вижу прежде всего в [Показать структуру]		videt	NONPREF	AFFIRM	imperfective	no	present	yes	ov	2	np	generic	inanim	sg	nomacc
295	специфике российского пути развития, постараюсь	изложить	свою гипотезу о природе устойчивости [Показать структуру]		izlagat	PREF	AFFIRM	perfective	no	nfin	dep_infinitive	vo	0	np	def	inanim	sg	acc
296	литературе почти всякое исторически устойчивое	явление	именуют традицией. [Показать структуру]		imenovat	NONPREF	AFFIRM	imperfective	no	present	yes	ov	0	np	indef	inanim	sg	nomacc
297	И это в значительной мере	затрудняет	понимание многих современных социальных и [Показать структуру]		zatrudnat	PREF	AFFIRM	imperfective	no	present	yes	vo	0	np	generic	inanim	sg	nomacc
298	Традиция является предписанием,	которое	предыдущие поколения оставляют своим потомкам [Показать структуру]	subordinate	ostavljat	PREF	AFFIRM	imperfective	yes	present	yes	ov	2	relative_pro	def	inanim	sg	nomacc
299	люди зимой кутаются, а летом	снимают	с себя лишние одежды, - то [Показать структуру]		snimat	PREF	AFFIRM	imperfective	no	present	yes	vo	2	np	indef	inanim	pl	nomacc
300	России в инициированную Кремлем организацию,	решив	для себя вопрос выживания. [Показать структуру]	subordinate	resat	NONPREF	AFFIRM	perfective	no	nfin	converb	vo	2	np	def	inanim	sg	nomacc
301	Никита Белых заявил, что не	видит	себя в этой организации, и [Показать структуру]		videt	NONPREF	NEGAT	imperfective	no	present	yes	vo	0	refl_pro	def	anim	sg	acc
302	Согласно уставу партии	его	временно сменил заместитель председателя политсовета [Показать структуру]		smenjat	PREF	AFFIRM	perfective	no	past	yes	ov	1	pers_pro	def	anim	sg	acc
303	Борис Немцов долгое время	возглавлял	СПС, а бывший заместитель министра [Показать структуру]		vozglavljat	PREF	AFFIRM	imperfective	no	past	yes	vo	0	np	def	inanim	sg	nomacc
304	ним обратились партийцы с просьбой	дать	оценку ситуации. [Показать структуру]	main	davat	NONPREF	AFFIRM	perfective	no	nfin	infinitive	vo	0	np	indef	inanim	sg	acc
305	последних событий "Союз правых сил"	прекратил	свое существование как оппозиционная демократическая [Показать структуру]		prekrascat	NONPREF	AFFIRM	perfective	no	past	yes	vo	0	np	def	inanim	sg	nomacc
306	гарантией независимости партии, ее способности "	проводить	самостоятельную политическую линию, отстаивать либерально-демократические [Показать структуру]		provodit	PREF	AFFIRM	imperfective	no	nfin	dep_infinitive	vo	0	np	indef	inanim	sg	acc
307	В связи с этим Немцов и Милов	призвали	правых выйти из партии, которой [Показать структуру]		prizyvat	PREF	AFFIRM	perfective	no	past	yes	vo	0	np	indef	anim	pl	acc
308	и образованные люди, они сумеют	отличить	фальшь", - считает г-н Немцов. [Показать структуру]		otlicat	PREF	AFFIRM	perfective	no	nfin	dep_infinitive	vo	0	np	indef	inanim	sg	nomacc
309	в одном случае - если бы	ее	возглавил президент России Дмитрий Медведев [Показать структуру]		vozglavljat	PREF	AFFIRM	perfective	no	subjunctive	yes	ov	0	pers_pro	def	anim	sg	acc
310	Свою	статью	я заканчивал старой поговоркой: "В [Показать структуру]		zakancivat	PREF	AFFIRM	imperfective	yes	past	yes	ov	1	np	def	inanim	sg	acc
311	с г-ном Ихловым и не	считаю	его статью "возражением" мне. [Показать структуру]		scitat	PREF	NEGAT	imperfective	no	present	yes	vo	1	np	def	inanim	sg	acc
312	ли, спорить с этим, восторженно	облизывать	подошвы Кремля, доказывая, что Россия [Показать структуру]		oblizyvat	PREF	AFFIRM	imperfective	yes	nfin	infinitive	vo	0	np	def	inanim	pl	nomacc
313	Ихлов	напоминает	очевидные вещи: если шевченки- прохановы [Показать структуру]		napominat	PREF	AFFIRM	imperfective	no	present	yes	vo	0	np	indef	inanim	pl	nomacc
314	удивляться- возмущаться, за что же	их	судят: кругом враги, НАТО далеко [Показать структуру]		sudit	NONPREF	AFFIRM	imperfective	no	present	yes	ov	0	pers_pro	def	anim	pl	acc
315	к пламенным пропагандистам- прокурорам- чекистам,	сказать	классическое: "Вы убили, вы главный [Показать структуру]		govorit	PREF	AFFIRM	perfective	no	nfin	dep_infinitive	vo	0	np	generic	inanim	sg	nomacc
316	слово отзовется, не бином Ньютона:	разжигаете	"державный патриотизм, ненависть к врагам [Показать структуру]		razzigat	PREF	AFFIRM	imperfective	yes	present	yes	vo	0	np	generic	inanim	sg	nomacc
317	и в том, что кто	сеет	ветер, пожнет бурю. [Показать структуру]		sejat	NONPREF	AFFIRM	imperfective	no	present	yes	vo	0	np	indef	inanim	sg	nomacc
318	Любую	идею	можно подтвердить примерами. [Показать структуру]	main	podtverzdat	PREF	AFFIRM	perfective	no	nfin	dep_infinitive	ov	1	np	indef	inanim	sg	acc
319	Поэтому Виктор Садовничий не хочет	увеличивать	количество платных мест в МГУ [Показать структуру]	main	uvelicivat	PREF	AFFIRM	imperfective	no	nfin	dep_infinitive	vo	0	np	def	inanim	sg	nomacc
320	Чтобы	расширить	учебные площади, ректор несколько лет [Показать структуру]	subordinate	rassirjat	PREF	AFFIRM	perfective	no	nfin	infinitive	vo	0	np	indef	inanim	pl	nomacc
321	А в начале апреля	зарегистрировал	университетский эндаумент (фонд целевого назначения [Показать структуру]		registrirovat	PREF	AFFIRM	perfective	no	past	yes	vo	0	np	def	inanim	sg	nomacc
322	с таким же успехом эту	коллизию	можно было применить ко многим [Показать структуру]		primenjat	PREF	AFFIRM	perfective	no	nfin	dep_infinitive	ov	2	np	def	inanim	sg	acc
323	деканам пришлось бы каждую такую	покупку	согласовывать в ректорате и деятельность [Показать структуру]		soglasovyvat	PREF	AFFIRM	imperfective	yes	nfin	dep_infinitive	ov	0	np	indef	inanim	sg	acc
324	они не были юрлицами, не	открывали	бы расчетные счета в банках [Показать структуру]		otkryvat	PREF	NEGAT	imperfective	no	subjunctive	yes	vo	1	np	indef	inanim	pl	nomacc
325		Приказы	о приеме и выпуске всех студентов, о приеме на работу профессоров, университетские дипломы подписывает ректор МГУ. [Показать структуру]		podpisyvat	PREF	AFFIRM	imperfective	yes	present	yes	ov	12	np	indef	inanim	pl	nomacc
326	зданиями не закреплено: университет лишь	предоставил	их факультетам для осуществления научно-образовательного [Показать структуру]		predostavljat	PREF	AFFIRM	perfective	no	past	yes	vo	0	pers_pro	def	inanim	pl	acc
327	являются отдельными юрлицами, они должны	иметь	отдельные лицензии на предоставление образовательных [Показать структуру]		imet	NONPREF	AFFIRM	imperfective	no	nfin	dep_infinitive	vo	0	np	indef	inanim	pl	nomacc
328	юридическим факультетом и налоговой инспекцией,	который	налоговая инспекция проиграла во всех [Показать структуру]	subordinate	proigryvat	PREF	AFFIRM	perfective	no	past	yes	ov	2	relative_pro	def	inanim	sg	nomacc
329	"Зеленый"	продолжит	рост, уверяют как независимые аналитики [Показать структуру]		prodolzat	PREF	AFFIRM	perfective	no	future	yes	vo	0	np	generic	inanim	sg	nomacc
330	Центробанка (ЦБ) на прошлой неделе	превысил	отметку в 25 руб. за [Показать структуру]		prevysat	PREF	AFFIRM	perfective	no	past	yes	vo	0	np	def	inanim	sg	acc
331	обменных пунктов выстроились очереди, что	напомнило	старые "добрые" времена дефолта 1998 [Показать структуру]		napominat	PREF	AFFIRM	perfective	no	past	yes	vo	0	np	def	inanim	pl	nomacc
332	не критично, и никаких специальных	мер	по этому поводу Банк России предпринимать не будет. [Показать структуру]		predprinimat	PREF	NEGAT	imperfective	no	nfin	dep_infinitive	ov	5	np	indef	inanim	pl	gen
333	Если попытаться	поискать	положительные моменты в укреплении доллара [Показать структуру]	main	iskat	PREF	AFFIRM	perfective	no	nfin	dep_infinitive	vo	0	np	indef	inanim	pl	nomacc
334	Вклады в рублях	увеличили	покупательную способность на 0,32 % [Показать структуру]		uvelicivat	PREF	AFFIRM	perfective	no	past	yes	vo	0	np	def	inanim	sg	acc
335	Кадровые агентства месяцами не могут	найти	специалистов на большие зарплаты. [Показать структуру]	main	nahodit	PREF	AFFIRM	perfective	no	nfin	dep_infinitive	vo	0	np	indef	anim	pl	acc
336	дворников и плотников говорят давно,	объясняя	нехватку рабочих тем, что молодежь [Показать структуру]	subordinate	objasnjat	PREF	AFFIRM	imperfective	no	nfin	converb	vo	0	np	def	inanim	sg	acc
337	Все, мол,	ищут	доходное место. [Показать структуру]		iskat	NONPREF	AFFIRM	imperfective	no	present	yes	vo	0	np	indef	inanim	sg	nomacc
338		Работников	переманивают из одной компании в [Показать структуру]		peremanivat	PREF	AFFIRM	imperfective	yes	present	yes	ov	0	np	indef	anim	pl	acc
339	Но число вакансий	превышает	количество соискателей в полтора- два [Показать структуру]		prevysat	PREF	AFFIRM	imperfective	no	present	yes	vo	0	np	def	inanim	sg	nomacc
340	элитных магазинов, месяц не могла	найти	продавца- консультанта. [Показать структуру]		nahodit	PREF	AFFIRM	perfective	no	nfin	dep_infinitive	vo	0	np	indef	anim	sg	acc
341	Другой знакомый, специалист IT,	меняет	работы как перчатки, чуть что [Показать структуру]		menjat	NONPREF	AFFIRM	imperfective	no	present	yes	vo	0	np	indef	inanim	pl	nomacc
342	оказалось, ерунда по сравнению с кадровыми войнами,	которые	устраивают компании. [Показать структуру]	subordinate	ustraivat	PREF	AFFIRM	imperfective	no	present	yes	ov	0	relative_pro	def	inanim	pl	nomacc
343		Переманивать	специалистов из одной компании в [Показать структуру]		peremanivat	PREF	AFFIRM	imperfective	yes	nfin	infinitive	vo	0	np	indef	anim	pl	acc
344	- Клиенты	дают	заявку на работника: квалификация, стаж [Показать структуру]		davat	NONPREF	AFFIRM	imperfective	no	present	yes	vo	0	np	indef	inanim	sg	acc
345	СЕГОДНЯ ЗВУЧАТ ПРИЗЫВЫ	ЗАФИКСИРОВАТЬ	СТАВКУ НА УРОВНЕ 12 % [Показать структуру]		fiksirovat	PREF	AFFIRM	perfective	no	nfin	infinitive	vo	0	np	def	inanim	sg	acc
346	ОПАСНОСТЬ, ЧТО СТОЛЬ РАДИКАЛЬНЫЕ РЕФОРМЫ	ВЫЗОВУТ	НОВЫЕ ПРОБЛЕМЫ. [Показать структуру]		vyzyvat	PREF	AFFIRM	perfective	no	future	yes	vo	0	np	indef	inanim	pl	nomacc
347		Его	трудно платить и непросто администрировать [Показать структуру]		platit	NONPREF	AFFIRM	imperfective	no	nfin	dep_infinitive	ov	1	pers_pro	def	inanim	sg	acc
348	Когда баррель нефти	стоил	девять долларов, развивающийся в стране [Показать структуру]		stoit	NONPREF	AFFIRM	imperfective	no	past	yes	vo	0	quant	indef	inanim	pl	nomacc
349	ныне, по данным ФНС, НДС	обеспечивает	лишь 24 % налоговых доходов [Показать структуру]		obespecivat	PREF	AFFIRM	imperfective	no	present	yes	vo	1	quant	indef	inanim	pl	nomacc
350	в устах тех, кто призывает	снизить	налог на фоне очевидного бюджетного [Показать структуру]		snizat	PREF	AFFIRM	perfective	no	nfin	dep_infinitive	vo	0	np	def	inanim	sg	nomacc
351	Собственно говоря,	план	этот мало кто видел. [Показать структуру]		videt	NONPREF	AFFIRM	imperfective	no	past	yes	ov	2	np	def	inanim	sg	nomacc
352	Еще меньше тех, кто способен	пересказать	ключевые экономические посылы этого документа [Показать структуру]	subordinate	pereskazyvat	PREF	AFFIRM	perfective	no	nfin	dep_infinitive	vo	0	np	def	inanim	pl	nomacc
353	Накануне президентских выборов Владимир Путин	озвучил	свои предложения, а затем избранный [Показать структуру]		ozvucivat	PREF	AFFIRM	perfective	no	past	yes	vo	0	np	def	inanim	pl	nomacc
354	позиция двух ведущих политиков, реально	определяющих	ход событий в стране. [Показать структуру]	subordinate	opredeljat	PREF	AFFIRM	imperfective	no	present	participle	vo	0	np	def	inanim	sg	nomacc
355	лет более чем в три раза	превышает	количество незанятой молодежи в возрасте [Показать структуру]		prevysat	PREF	AFFIRM	imperfective	no	present	yes	vo	0	np	def	inanim	sg	nomacc
356	качества мешают или могут помешать	получить	достойную работу?" почти треть опрошенных [Показать структуру]		polucat	PREF	AFFIRM	perfective	no	nfin	dep_infinitive	vo	0	np	indef	inanim	sg	acc
357	Еще четыре года назад достойной	работы	не могли получить по причине [Показать структуру]	main	polucat	PREF	NEGAT	perfective	no	nfin	dep_infinitive	ov	1	np	indef	inanim	sg	gen
358	проблема не только российская, феномен	имеет	свое название - "эйджизм" (от английского [Показать структуру]		imet	NONPREF	AFFIRM	imperfective	no	present	yes	vo	0	np	def	inanim	sg	nomacc
359	отношения к пожилым людям, убежден	придумавший	этот термин американский геронтолог Роберт [Показать структуру]	subordinate	pridumyvat	PREF	AFFIRM	imperfective	no	past	participle	vo	0	np	def	inanim	sg	nomacc
360	поскольку в молодости все мы	считаем	себя вечными, а старики представляются [Показать структуру]		scitat	PREF	AFFIRM	imperfective	no	present	yes	vo	0	refl_pro	def	anim	pl	acc
361	своей моралью, плохо обучаемы, не	знают	иностранных языков и компьютера - вот [Показать структуру]		znat	NONPREF	NEGAT	imperfective	no	present	yes	vo	0	np	indef	inanim	pl	gen
362	значит, сейчас они не могут	занимать	приличные должности. [Показать структуру]		zanimat	PREF	AFFIRM	imperfective	no	nfin	dep_infinitive	vo	0	np	indef	inanim	pl	nomacc
363	о сорокапятилетних "стариках", никогда не	пошлет	на курсы повышения квалификации такого сотрудника [Показать структуру]		posylat	PREF	NEGAT	perfective	no	future	yes	vo	4	np	indef	anim	sg	gen
364	Потому что молодой человек,	закончив	курсы и набравшись опыта, через [Показать структуру]	subordinate	zakancivat	PREF	AFFIRM	perfective	no	nfin	converb	vo	0	np	indef	inanim	pl	nomacc
365	грех жаловаться: торговля в сетях	приобрела	цивилизованный вид. [Показать структуру]		priobretat	PREF	AFFIRM	perfective	no	past	yes	vo	0	np	generic	inanim	sg	nomacc
366	при заключении договоров поставки, необходимость	оплачивать	"входные билеты", предоставлять сетям дополнительные [Показать структуру]		oplacivat	PREF	AFFIRM	imperfective	yes	nfin	dep_infinitive	vo	0	np	generic	inanim	pl	nomacc
367	и торговли России было поручено	разработать	закон о государственном регулировании внутренней [Показать структуру]		razrabatyvat	PREF	AFFIRM	perfective	no	nfin	dep_infinitive	vo	0	np	indef	inanim	sg	nomacc
368		Повторяем	чужой опыт? [Показать структуру]		povtorjat	PREF	AFFIRM	imperfective	yes	present	yes	vo	0	np	indef	inanim	sg	nomacc
369	гг. 27 из 48 штатов	приняли	налоговое законодательство, призванное сдержать развитие [Показать структуру]		prinimat	PREF	AFFIRM	perfective	no	past	yes	vo	0	np	def	inanim	sg	nomacc
370	сетей в обороте розничной торговли	превысила	20 %. [Показать структуру]		prevysat	PREF	AFFIRM	perfective	no	past	yes	vo	0	quant	indef	inanim	pl	nomacc
371	товарообороте на общероссийском уровне недавно	преодолела	20%-ный рубеж. [Показать структуру]		preodolevat	PREF	AFFIRM	perfective	no	past	yes	vo	0	np	indef	inanim	sg	nomacc
372	к торговле, или к "торгашам",	которую	трудно преодолеть с помощью рациональных аргументов [Показать структуру]	subordinate	preodolevat	PREF	AFFIRM	perfective	no	nfin	dep_infinitive	ov	1	relative_pro	def	inanim	sg	acc
373	А во-вторых, розничные сети стремительно	развивают	современные торговые форматы, более эффективные [Показать структуру]		razvivat	PREF	AFFIRM	imperfective	yes	present	yes	vo	0	np	indef	inanim	pl	nomacc
374	Раз в четыре года мы	делаем	выбор и несем за него [Показать структуру]		delat	NONPREF	AFFIRM	imperfective	no	present	yes	vo	0	np	indef	inanim	sg	nomacc
375	Страна	проводит	либеральные и далеко идущие реформы [Показать структуру]		provodit	PREF	AFFIRM	imperfective	no	present	yes	vo	0	np	indef	inanim	pl	nomacc
376	1861 года император Александр II,	переломив	сопротивление и косность дворянства и [Показать структуру]	subordinate	perelamyvat	PREF	AFFIRM	perfective	no	nfin	converb	vo	0	np	def	inanim	sg	nomacc
377	Затем он	осуществил	реформу образования, предоставив университетам полную [Показать структуру]		osuscestvljat	PREF	AFFIRM	perfective	no	past	yes	vo	0	np	def	inanim	sg	acc
378	с современным Косово), эти группы	навязывают	Александру в 1877 году войну [Показать структуру]		navjazyvat	PREF	AFFIRM	imperfective	yes	present	yes	vo	3	np	def	inanim	sg	acc
379	А в 1881 году	проигрывает	войну внутреннему терроризму - Александр II [Показать структуру]		proigryvat	PREF	AFFIRM	imperfective	yes	present	yes	vo	0	np	def	inanim	sg	acc
380	Группа интересов,	которую	сейчас мы назвали бы военно-промышленный [Показать структуру]	subordinate	nazyvat	PREF	AFFIRM	perfective	no	subjunctive	yes	ov	2	relative_pro	def	inanim	sg	acc
381	накануне, в 1978 году, страна	занимала	второе место в мире по [Показать структуру]		zanimat	PREF	AFFIRM	imperfective	no	past	yes	vo	0	np	def	inanim	sg	nomacc
382		Оставлю	этот вопрос без ответа. [Показать структуру]		ostavljat	PREF	AFFIRM	perfective	no	future	yes	vo	0	np	def	inanim	sg	nomacc
383	Однако	напомню	слова Конфуция: только тот, кто [Показать структуру]		napominat	PREF	AFFIRM	perfective	no	future	yes	vo	0	np	def	inanim	pl	nomacc
384	Эти	цифры	"вывели" авторы исследования "Изменение масштабов [Показать структуру]		vyvodit	PREF	AFFIRM	perfective	no	past	yes	ov	0	np	def	inanim	pl	nomacc
385	Высшей школы экономики, которые и	проводили	исследование. [Показать структуру]		provodit	PREF	AFFIRM	imperfective	no	past	yes	vo	0	np	def	inanim	sg	nomacc
386	Сейчас можно	выделить	четыре сферы распространения контрафактной продукции [Показать структуру]		vydeljat	PREF	AFFIRM	perfective	no	nfin	dep_infinitive	vo	0	quant	indef	inanim	pl	nomacc
387	сбытчики контрафактной продукции не намерены	сдавать	своих позиций в борьбе с [Показать структуру]		sdavat	PREF	NEGAT	imperfective	no	nfin	dep_infinitive	vo	0	np	def	inanim	pl	gen
388	политики по борьбе с контрафактом	предполагает	последовательное продвижение, сочетающее ужесточение законодательных [Показать структуру]		predpolagat	PREF	AFFIRM	imperfective	no	present	yes	vo	0	np	generic	inanim	sg	nomacc
389	сложилось окончательных определений, что нередко	вызывает	неоднозначные толкования, когда участники рынка [Показать структуру]		vyzyvat	PREF	AFFIRM	imperfective	yes	present	yes	vo	0	np	indef	inanim	pl	nomacc
390	России, но зато их продажа	заняла	большое пространство в Интернете. [Показать структуру]		zanimat	PREF	AFFIRM	perfective	no	past	yes	vo	0	np	indef	inanim	sg	nomacc
391	соответствующих дел до суда (особо	отметили	активность таможенных органов). [Показать структуру]		otmecat	PREF	AFFIRM	perfective	no	past	yes	vo	0	np	def	inanim	sg	nomacc
392	направлено не на то, чтобы	осознать	проблему на государственном уровне (это [Показать структуру]		osoznavat	PREF	AFFIRM	perfective	no	nfin	infinitive	vo	0	np	def	inanim	sg	acc
393	зная о контрафактности товара, все равно	его	покупают из-за сравнительно низкой цены [Показать структуру]		pokupat	PREF	AFFIRM	imperfective	no	present	yes	ov	0	pers_pro	def	inanim	sg	acc
394		Их	обобщила в недавно изданной книге [Показать структуру]		obobscat	PREF	AFFIRM	perfective	no	past	yes	ov	0	pers_pro	def	inanim	pl	acc
395	Японцы смогли	уничтожить	множество корейских кораблей. [Показать структуру]	main	unictozat	PREF	AFFIRM	perfective	no	nfin	dep_infinitive	vo	0	np	indef	inanim	sg	nomacc
396	морская черепаха с головой дракона,	выбрасывавшая	из пасти огонь. [Показать структуру]	subordinate	vybrasyvat	PREF	AFFIRM	imperfective	yes	past	participle	vo	2	np	indef	inanim	sg	nomacc
397	Никакие мечи не могли	пробить	панцирь черепахи. [Показать структуру]	main	probivat	PREF	AFFIRM	perfective	no	nfin	dep_infinitive	vo	0	np	def	inanim	sg	nomacc
398	Проснувшись, Йи приказал корабелам	построить	судно из толстых сосновых бревен [Показать структуру]	main	stroit	PREF	AFFIRM	perfective	no	nfin	dep_infinitive	vo	0	np	indef	inanim	sg	nomacc
399	этих первых в мире броненосцев	отразил	нападение врагов. [Показать структуру]		otrazat	PREF	AFFIRM	perfective	no	past	yes	vo	0	np	def	inanim	sg	nomacc
400	Но тут сломалась машина,	производящая	это волокно на фирме "Дюпон [Показать структуру]	subordinate	proizvodit	PREF	AFFIRM	imperfective	no	present	participle	vo	0	np	def	inanim	sg	nomacc
401	Инженеры	разобрали	установку, но не смогли найти [Показать структуру]		razbirat	PREF	AFFIRM	perfective	no	past	yes	vo	0	np	def	inanim	sg	acc
402	машине время от времени спадаются,	прерывая	поток воды, и тепловое реле [Показать структуру]	subordinate	preryvat	PREF	AFFIRM	imperfective	yes	nfin	converb	vo	0	np	generic	inanim	sg	nomacc
403	Евросоюз решил не	объявлять	бойкот России. [Показать структуру]	main	objavljat	PREF	NEGAT	imperfective	no	nfin	dep_infinitive	vo	0	np	generic	inanim	sg	nomacc
404	мнению экспертов, России не надо	строить	иллюзий по поводу своей неуязвимости - мы [Показать структуру]	main	stroit	NONPREF	NEGAT	imperfective	no	nfin	dep_infinitive	vo	0	np	generic	inanim	pl	gen
405	Максим Братерский полагает, что данное	решение	уже можно назвать санкцией. [Показать структуру]	subordinate	nazyvat	PREF	AFFIRM	perfective	no	nfin	dep_infinitive	ov	2	np	def	inanim	sg	nomacc
406	более 10 лет назад, Россия	подстраивала	свои правила под европейские, но [Показать структуру]		podstraivat	PREF	AFFIRM	imperfective	yes	past	yes	vo	0	np	def	inanim	pl	nomacc
407	Первый предлагал	ввести	против России финансово-экономические санкции, второй [Показать структуру]	main	vvodit	PREF	AFFIRM	perfective	no	nfin	dep_infinitive	vo	2	np	indef	inanim	pl	nomacc
408		Выбрали	второе, чему немало способствовала заинтересованность [Показать структуру]		vybirat	PREF	AFFIRM	perfective	no	past	yes	vo	0	quant	def	inanim	sg	nomacc
409	После того как Турция	пропустила	через Босфор в Черное море корабли НАТО [Показать структуру]		propuskat	PREF	AFFIRM	perfective	no	past	yes	vo	4	np	def	inanim	pl	nomacc
410	что его страна будет вынуждена	принять	ответные меры, и турецкие пограничники [Показать структуру]	subordinate	prinimat	PREF	AFFIRM	perfective	no	nfin	dep_infinitive	vo	0	np	indef	inanim	pl	nomacc
411	Австралия заявила, что	пересмотрит	соглашение о поставках в Россию [Показать структуру]		peresmatrivat	PREF	AFFIRM	perfective	no	future	yes	vo	0	np	def	inanim	sg	nomacc
412		Ждет	ли нас голод? [Показать структуру]		zdat	NONPREF	AFFIRM	imperfective	no	present	yes	vo	2	pers_pro	def	anim	sg	acc
413	угрозой мировой безопасности и существенно	пополнить	список из 37 стран, нуждающихся [Показать структуру]		popolnjat	PREF	AFFIRM	perfective	no	nfin	dep_infinitive	vo	0	np	def	inanim	sg	nomacc
414	В Пакистане и Таиланде пришлось	охранять	поля и склады даже с помощью [Показать структуру]	main	ohranjat	PREF	AFFIRM	imperfective	yes	nfin	dep_infinitive	vo	0	np	indef	inanim	pl	nomacc
415	Скандинавские страны и США стали	отводить	огромные площади под растительное сырье [Показать структуру]	main	otvodit	PREF	AFFIRM	imperfective	no	nfin	dep_infinitive	vo	0	np	def	inanim	pl	acc
416	Люди даже устали	обсуждать	эту тему. [Показать структуру]	main	obsuzdat	PREF	AFFIRM	imperfective	yes	nfin	dep_infinitive	vo	0	np	def	inanim	sg	acc
417	они вообще не смогут себе	ничего	позволить? [Показать структуру]	main	pozvoliat	PREF	NEGAT	perfective	no	nfin	dep_infinitive	ov	0	neg_pro	indef	inanim	sg	gen
418	Может, пора	возрождать	в массовом порядке огородные хозяйства [Показать структуру]	main	vozrozdat	PREF	AFFIRM	imperfective	no	nfin	dep_infinitive	vo	2	np	indef	inanim	pl	nomacc
419	А если продукты станут на вес золота, то	их	перестанут импортировать. [Показать структуру]		importirovat	PREF	AFFIRM	imperfective	no	nfin	dep_infinitive	ov	1	pers_pro	def	inanim	pl	acc
420	2007 г. на российских полях	собрали	81 млн. [Показать структуру]		sobirat	PREF	AFFIRM	perfective	no	past	yes	vo	0	quant	indef	inanim	sg	nomacc
421	новости общемирового значения последних лет,	которую	люди имеют обыкновение забывать, занятые [Показать структуру]	subordinate	zabyvat	PREF	AFFIRM	imperfective	yes	present	yes	ov	3	relative_pro	def	inanim	sg	acc
422	Никто еще, по-моему, не	оценил	это воистину тектоническое изменение в [Показать структуру]		ocenivat	PREF	NEGAT	perfective	no	past	yes	vo	0	np	def	inanim	sg	nomacc
423	На базовом уровне	ее	двигали три инстинкта - страх, любовь [Показать структуру]		dvigat	NONPREF	AFFIRM	imperfective	no	past	yes	ov	0	pers_pro	def	anim	sg	acc
424	благосостояния людей в огромных регионах	уменьшает	напряженность по вертикали Север- Юг [Показать структуру]		umensat	PREF	AFFIRM	imperfective	no	present	yes	vo	0	np	def	inanim	sg	nomacc
425	экономики стран Латинской Америки начал	выводить	из "Юга" и большую часть [Показать структуру]		vyvodit	PREF	AFFIRM	imperfective	no	nfin	dep_infinitive	vo	3	np	def	inanim	sg	acc
426	но оно либо снижается, либо	принимает	новые формы. [Показать структуру]		prinimat	PREF	AFFIRM	imperfective	no	present	yes	vo	0	np	indef	inanim	pl	nomacc
427	потребления в ранее нищих странах	увеличивает	давление на окружающую среду. [Показать структуру]		uvelicivat	PREF	AFFIRM	imperfective	no	present	yes	vo	0	np	generic	inanim	sg	nomacc
428	Эти люди	составляют	реальную конкуренцию западному "низшему" среднему [Показать структуру]		sostavljat	PREF	AFFIRM	imperfective	yes	present	yes	vo	0	np	generic	inanim	sg	acc
429	В последнее десятилетие	давление	стали испытывать многие слои коренного [Показать структуру]	main	ispytyvat	PREF	AFFIRM	imperfective	yes	nfin	dep_infinitive	ov	1	np	indef	inanim	sg	nomacc
430	Но для города, который этот	финал	принимает, это что угодно, только [Показать структуру]		prinimat	PREF	AFFIRM	imperfective	no	present	yes	ov	0	np	def	inanim	sg	nomacc
431	соперники, игра - для хозяев матча	значения	не имеют. [Показать структуру]		imet	NONPREF	NEGAT	imperfective	no	present	yes	ov	0	np	generic	inanim	sg	gen
432	говорят, что Россия не сможет	организовать	Игры в Сочи, мне смешно [Показать структуру]	subordinate	organizovyvat	NONPREF	AFFIRM	perfective	no	nfin	dep_infinitive	vo	0	np	def	inanim	pl	nomacc
433	Потому что	предполагать	такое, значит абсолютно не понимать [Показать структуру]	subordinate	predpolagat	PREF	AFFIRM	imperfective	no	nfin	infinitive	vo	0	dem_pro	def	inanim	sg	nomacc
434	по отношению к иностранцам со жгучим желанием	пустить	им пыль в глаза, произвести [Показать структуру]		puskat	NONPREF	AFFIRM	perfective	no	nfin	infinitive	vo	1	np	indef	inanim	sg	nomacc
435	будем по ночам работать, последние	деньги	отдадим и последнюю рубаху сымем [Показать структуру]		otdavat	PREF	AFFIRM	perfective	no	future	yes	ov	1	np	generic	inanim	pl	nomacc
436	Все	это	забирает себе хозяин проекта - УЕФА [Показать структуру]	main	zabirat	PREF	AFFIRM	imperfective	yes	present	yes	ov	0	dem_pro	def	inanim	sg	nomacc
437	Две	трети	Лужников заполнили англичане, несколько тысяч [Показать структуру]		zapolnjat	PREF	AFFIRM	perfective	no	past	yes	ov	1	np	def	inanim	sg	nomacc
438	Но вот это самое "отлично"	меня	и… огорчило. [Показать структуру]		ogorcat	PREF	AFFIRM	perfective	no	past	yes	ov	1	pers_pro	def	anim	sg	acc
439	Москву и тем, как Москва	их	встретила, мне захотелось понять: почему [Показать структуру]		vstrecat	PREF	AFFIRM	perfective	no	past	yes	ov	0	pers_pro	def	anim	pl	acc
440	К середнякам сейчас можно	отнести	14 млн. семей. [Показать структуру]		otnosit	PREF	AFFIRM	perfective	no	nfin	dep_infinitive	vo	0	quant	indef	inanim	pl	nomacc
441	Так	кого	же все-таки можно отнести к [Показать структуру]	main	otnosit	PREF	AFFIRM	perfective	no	nfin	dep_infinitive	ov	3	inter_pro	indef	anim	sg	acc
442	России доход представителей среднего класса	составляет	40 - 50 тысяч на семью [Показать структуру]		sostavljat	PREF	AFFIRM	imperfective	yes	present	yes	vo	0	quant	indef	inanim	pl	nomacc
443	Он способен	взять	кредит, а также пользоваться услугами платного [Показать структуру]	main	brat	PREF	AFFIRM	perfective	no	nfin	dep_infinitive	vo	0	np	generic	inanim	sg	nomacc
444	поколения, несмотря на хороший достаток, не	покупают	машину, предпочитая пользоваться такси. [Показать структуру]		pokupat	PREF	NEGAT	imperfective	no	present	yes	vo	0	np	indef	inanim	sg	acc
445	Это люди, которые	составляют	основу некоммерческих организаций, а также ведут [Показать структуру]		sostavljat	PREF	AFFIRM	imperfective	yes	present	yes	vo	0	np	generic	inanim	sg	acc
446	Ведь им есть	что	терять, а потому небезразлично, кто [Показать структуру]	subordinate	terjat	NONPREF	AFFIRM	imperfective	no	nfin	infinitive	ov	0	relative_pro	indef	inanim	sg	nomacc
447	Не меньшее	значение	имеют образование и работа. [Показать структуру]		imet	NONPREF	AFFIRM	imperfective	no	present	yes	vo	0	np	indef	inanim	sg	nomacc
448	так как многие госслужащие все еще	имеют	очень невысокую зарплату. [Показать структуру]		imet	NONPREF	AFFIRM	imperfective	no	present	yes	vo	1	np	indef	inanim	sg	acc
449	Но если	отнять	какой-нибудь один из этих признаков [Показать структуру]		otnimat	PREF	AFFIRM	perfective	no	nfin	infinitive	vo	0	np	indef	inanim	sg	nomacc
450	Количество готовых	давать	"образовательные" взятки уменьшается? [Показать структуру]	main	davat	NONPREF	AFFIRM	imperfective	no	nfin	dep_infinitive	vo	0	np	indef	inanim	pl	nomacc
451	конечно, сомнительно, что 1600 респондентов,	которых	опрашивал ВЦИОМ, могут в этом [Показать структуру]	subordinate	oprasivat	PREF	AFFIRM	imperfective	yes	past	yes	ov	0	relative_pro	def	anim	pl	acc
452	Думаю, немалую	роль	в изменении отношения сыграл Единый [Показать структуру]		igrat	PREF	AFFIRM	perfective	no	past	yes	ov	2	np	generic	inanim	sg	nomacc
453	Абитуриент	выполняет	задание на бланке, не указывая [Показать структуру]		vypolnjat	PREF	AFFIRM	imperfective	no	present	yes	vo	0	np	indef	inanim	sg	nomacc
454	тут уже поступающий может прийти	посмотреть	работу, встретиться с преподавателем, обсудить [Показать структуру]	main	smotret	PREF	AFFIRM	perfective	no	nfin	dep_infinitive	vo	0	np	def	inanim	sg	acc
455	И бесполезно	кого-либо	искать, чтобы дать взятку. [Показать структуру]	main	iskat	NONPREF	AFFIRM	imperfective	no	nfin	dep_infinitive	ov	0	indef_pro	indef	anim	sg	acc
456	ЕГЭ не до конца технологически	решил	эту проблему. [Показать структуру]		resat	NONPREF	AFFIRM	perfective	no	past	yes	vo	0	np	def	inanim	sg	acc
457	все времена студенты подрабатывали репетиторством,	вспомним	хотя бы Чехова. [Показать структуру]		vspominat	PREF	AFFIRM	perfective	no	imperative	yes	vo	1	name	def	anim	sg	acc
458	Я сам на старших курсах	давал	уроки. [Показать структуру]		davat	NONPREF	AFFIRM	imperfective	no	past	yes	vo	0	np	indef	inanim	pl	nomacc
459	Ясно, что никакого	влияния	на результат поступления я, студент, не имел. [Показать структуру]		imet	NONPREF	NEGAT	imperfective	no	past	yes	ov	5	np	indef	inanim	sg	gen
460		ЧТО	МОЖЕТ ПРЕЗИДЕНТ [Показать структуру]	main	moc	NONPREF	AFFIRM	imperfective	no	present	yes	ov	0	inter_pro	indef	inanim	sg	nomacc
461	кадровая: он прямо или косвенно	назначает	премьера, силовых министров, губернаторов, судей [Показать структуру]		naznacat	PREF	AFFIRM	imperfective	no	present	yes	vo	0	np	indef	anim	sg	acc
462	Основными рычагами президентской власти можно	считать	такие, которые напрямую связаны с [Показать структуру]	main	scitat	PREF	AFFIRM	imperfective	no	nfin	dep_infinitive	vo	0	dem_pro	indef	inanim	pl	nomacc
463	Если поначалу	президента	не слишком интересовали детали финансово [Показать структуру]		interesovat	NONPREF	AFFIRM	imperfective	no	past	yes	ov	2	np	def	anim	sg	acc
464	началось с 1996 г., когда	ее	возглавил Анатолий Чубайс, но существенное [Показать структуру]		vozglavljat	PREF	AFFIRM	perfective	no	past	yes	ov	0	pers_pro	def	inanim	sg	acc
465	Он	приводит	в пример последние перестановки в правительстве [Показать структуру]		privodit	PREF	AFFIRM	imperfective	no	present	yes	vo	1	np	def	inanim	pl	nomacc
466		ЧТО	СМОЖЕТ ПРЕМЬЕР. [Показать структуру]	main	moc	PREF	AFFIRM	perfective	no	future	yes	ov	0	inter_pro	indef	inanim	sg	nomacc
467	военной политики статья 114 Конституции	предоставляет	правительству полномочия практически во всех [Показать структуру]		predstavljat	PREF	AFFIRM	imperfective	no	present	yes	vo	1	np	indef	inanim	pl	nomacc
468	29 закона о правительстве, которая	предусматривает	специальный орган при кабмине - президиум [Показать структуру]		predusmatrivat	PREF	AFFIRM	imperfective	yes	present	yes	vo	0	np	indef	inanim	sg	nomacc
469	Осточертело через замочную скважину	разглядывать	их телодвижения. [Показать структуру]	main	razgljadyvat	PREF	AFFIRM	imperfective	yes	nfin	dep_infinitive	vo	1	np	def	inanim	pl	nomacc
470	Вот прочитала недавно, как	искали	по Москве милиционеров со "сносным [Показать структуру]		iskat	NONPREF	AFFIRM	imperfective	no	past	yes	vo	2	np	indef	anim	pl	acc
471	Потому что по нашим меркам	навести	порядок среди фанатов очень просто [Показать структуру]		navodit	PREF	AFFIRM	perfective	no	nfin	infinitive	vo	0	np	generic	inanim	sg	nomacc
472			Дубинкой по шее одного, другого, а третий сам поймет, что делает что-то, не соответствующее принятым нормам поведения. [Показать структуру]	subordinate	delat	NONPREF	AFFIRM	imperfective	no	present	yes	vo	0	indef_pro	indef	inanim	sg	nomacc
473	Мы	проходили	это на матчах, на маршах [Показать структуру]	main	prohodit	PREF	AFFIRM	imperfective	no	past	yes	vo	0	dem_pro	def	inanim	sg	nomacc
474	Если в данном случае удастся	решить	проблему с помощью наличествующих кадров, то [Показать структуру]	subordinate	resat	NONPREF	AFFIRM	perfective	no	nfin	dep_infinitive	vo	0	np	def	inanim	sg	acc
475	Можно ли	это	считать сигналом, что до полного [Показать структуру]	main	scitat	PREF	AFFIRM	imperfective	no	nfin	dep_infinitive	ov	0	dem_pro	def	inanim	sg	nomacc
476	поливаемому сегодня грязью Ельцину могли	простить	что угодно. [Показать структуру]	main	proscat	PREF	AFFIRM	perfective	no	nfin	dep_infinitive	vo	0	indef_pro	indef	inanim	sg	nomacc
477	И	жеребьевку	по заказам с дефицитными продуктами в каждой организации помню [Показать структуру]		pomnit	NONPREF	AFFIRM	imperfective	no	present	yes	ov	6	np	def	inanim	sg	acc
478	В общем, когда в августе 91 года шли спасать демократию	спасать	демократию, то были озабочены проблемами [Показать структуру]	subordinate	spasat	PREF	AFFIRM	imperfective	no	nfin	dep_infinitive	vo	0	np	generic	inanim	sg	acc
479	Эти гипотетические	объекты	принято называть первичными черными дырами [Показать структуру]	main	nazyvat	PREF	AFFIRM	imperfective	yes	nfin	dep_infinitive	ov	1	np	def	inanim	pl	nomacc
480	Любая черная дыра постепенно	теряет	свою массу за счет излучения Хокинга [Показать структуру]		terjat	NONPREF	AFFIRM	imperfective	no	present	yes	vo	0	np	def	inanim	sg	acc
481	полному испарению черной дыры - если	ее	, конечно, не подпитывают новые порции [Показать структуру]		podpityvat	PREF	NEGAT	imperfective	yes	present	yes	ov	1	pers_pro	def	inanim	sg	acc
482	такой дыры невелико, поэтому она	поглощает	вещество очень небольшими темпами. [Показать структуру]		pogloscat	PREF	AFFIRM	imperfective	no	present	yes	vo	0	np	generic	inanim	sg	nomacc
483	Это	делает	возможным длительное существование подобных объектов [Показать структуру]		delat	NONPREF	AFFIRM	imperfective	no	present	yes	vo	1	np	generic	inanim	sg	nomacc
484	ядре и в конечном итоге	ускорять	процесс превращения звезды в сверхновую [Показать структуру]		uskorjat	PREF	AFFIRM	imperfective	no	nfin	dep_infinitive	vo	0	np	def	inanim	sg	nomacc
485	пролетит сквозь Землю, практически не	заметив	ее присутствия. [Показать структуру]	subordinate	zamecat	PREF	NEGAT	perfective	no	nfin	converb	vo	1	np	def	inanim	sg	gen
486	сквозь земную твердь, дыра будет	оставлять	за собой специфический радиационный след [Показать структуру]		ostavljat	PREF	AFFIRM	imperfective	yes	nfin	dep_infinitive	vo	2	np	indef	inanim	sg	nomacc
487	назад американский математик Томас Хейлс	доказал	наконец сформулированную еще в 1611 году гипотезу Кеплера [Показать структуру]		dokazyvat	PREF	AFFIRM	perfective	no	past	yes	vo	1	np	def	inanim	sg	acc
488	"Рецензенты	приложили	беспрецедентные усилия", - писал Хейлсу редактор [Показать структуру]		prikladyvat	PREF	AFFIRM	perfective	no	past	yes	vo	0	np	indef	inanim	pl	nomacc
489	Они не	нашли	ни одной ошибки. [Показать структуру]		nahodit	PREF	NEGAT	perfective	no	past	yes	vo	1	np	indef	inanim	sg	gen
490	"Но	удостоверить	корректность доказательства в целом они [Показать структуру]	main	udostoverjat	PREF	AFFIRM	perfective	no	nfin	dep_infinitive	vo	0	np	def	inanim	sg	nomacc
491	можно сказать, без гарантии: 265	страниц	текста и 40 000 строчек компьютерного кода никто так и не проверил полностью. [Показать структуру]		proverjat	PREF	NEGAT	perfective	no	past	yes	ov	6	quant	indef	inanim	pl	nomacc
492	- Но	понять	ее доказательство во всем мире [Показать структуру]		ponimat	PREF	AFFIRM	perfective	no	nfin	yes	vo	1	np	def	anim	sg	nomacc
493	искривляются под воздействием гравитации, пока	это	не подтвердили эксперименты. [Показать структуру]	subordinate	podtverzdat	PREF	NEGAT	perfective	no	past	yes	ov	0	dem_pro	def	inanim	sg	nomacc
494	другие математики уверены, что эту	проблему	можно решить - с помощью так называемых [Показать структуру]	subordinate	resat	NONPREF	AFFIRM	perfective	no	nfin	dep_infinitive	ov	1	np	def	inanim	sg	acc
495	Таким образом,	цепочку	рассуждений может проверять машина, которая [Показать структуру]	main	proverjat	PREF	AFFIRM	imperfective	no	nfin	dep_infinitive	ov	2	np	indef	inanim	sg	acc
496	в мире чудовищно сложных технологий,	которые	нам все труднее контролировать, - говорит [Показать структуру]	subordinate	kontrolirovat	NONPREF	AFFIRM	imperfective	no	nfin	dep_infinitive	ov	3	relative_pro	def	inanim	pl	nomacc
497	Похоже, я так	затянул	этот сериал, что прогноз постепенно [Показать структуру]		zatjagivat	PREF	AFFIRM	perfective	no	past	yes	vo	0	np	def	inanim	sg	nomacc
498	Я	дал	себе слово написать ровно 21 [Показать структуру]		davat	NONPREF	AFFIRM	perfective	no	past	yes	vo	1	np	generic	inanim	sg	nomacc
499	Однако смешение "сказки и были"	имеет	свое преимущество: жизнь подправляет прогнозы [Показать структуру]		imet	NONPREF	AFFIRM	imperfective	no	present	yes	vo	0	np	indef	inanim	sg	nomacc
500		Обсуждая	текущие события с коллегами, я [Показать структуру]	subordinate	obsuzdat	PREF	AFFIRM	imperfective	no	nfin	converb	vo	0	np	def	inanim	pl	nomacc
501	еще об одном страхе, способном	примирить	нового президента с силовиками. [Показать структуру]	subordinate	primirjat	PREF	AFFIRM	perfective	no	nfin	dep_infinitive	vo	0	np	def	anim	sg	acc
502		Представьте	себя на месте какого-нибудь путинского [Показать структуру]		predstavljat	PREF	AFFIRM	perfective	no	imperative	yes	vo	0	refl_pro	def	anim	sg	acc
503	это ваша защита и возможность	преумножать	благосостояние. [Показать структуру]		preumnozat	PREF	AFFIRM	imperfective	no	nfin	infinitive	vo	0	np	generic	inanim	sg	nomacc
504	Но одновременно,	занимая	его, вы вынуждены вести двойную [Показать структуру]	subordinate	zanimat	PREF	AFFIRM	imperfective	no	nfin	converb	vo	0	pers_pro	def	inanim	sg	acc
505	случае возникает опасность, что твою	собственность	могут отобрать приходящие на твое [Показать структуру]	subordinate	otbirat	PREF	AFFIRM	perfective	no	nfin	dep_infinitive	ov	1	np	def	inanim	sg	nomacc
506	А теперь	сопоставим	с этим ряд фактов. [Показать структуру]		sopostavljat	PREF	AFFIRM	perfective	no	future	yes	vo	1	np	indef	inanim	sg	nomacc
507	по-моему, я тут в "ЕЖе"	открываю	спортивную рубрику на постоянной основе [Показать структуру]		otkryvat	PREF	AFFIRM	imperfective	no	present	yes	vo	0	np	indef	inanim	sg	acc
508	Наши спортсмены через день	устраивают	народу праздник, одерживают одну победу [Показать структуру]		ustraivat	PREF	AFFIRM	imperfective	yes	present	yes	vo	1	np	generic	inanim	sg	nomacc
509	эти кубки и медали никакого	влияния	не оказывают! [Показать структуру]		okazyvat	PREF	NEGAT	imperfective	no	present	yes	ov	0	np	indef	inanim	sg	gen
510	Это	что-то	меняет внутри нас. [Показать структуру]	main	menjat	NONPREF	AFFIRM	imperfective	no	present	yes	ov	0	indef_pro	indef	inanim	sg	nomacc
511	Великий матч - это возможность одномоментно	почувствовать	себя частью огромной общности счастливых [Показать структуру]		cuvstvovat	PREF	AFFIRM	perfective	no	nfin	infinitive	vo	0	refl_pro	def	anim	sg	acc
512	Границы стираются, глобализация	превращает	все в один большой Вавилон [Показать структуру]	main	prevrascat	PREF	AFFIRM	imperfective	no	present	yes	vo	0	all	def	inanim	sg	nomacc
513	страна на эти несколько часов	чувствует	себя единой. [Показать структуру]		cuvstvovat	NONPREF	AFFIRM	imperfective	no	present	yes	vo	0	refl_pro	def	inanim	sg	acc
514	именно 15 лет наша сборная	ничего	не выигрывала! [Показать структуру]		vyigryvat	PREF	NEGAT	imperfective	yes	past	yes	ov	0	neg_pro	indef	inanim	sg	gen
515	выигрыш чемпионата мира даже не	давали	звание заслуженного мастера спорта! [Показать структуру]		davat	NONPREF	NEGAT	imperfective	no	past	yes	vo	0	np	indef	inanim	sg	nomacc
516	Мы	обнаружили	диссонанс: то, что думают абитуриенты [Показать структуру]		obnaruzyvat	PREF	AFFIRM	perfective	no	past	yes	vo	0	np	indef	inanim	sg	nomacc
517	Работодатели не очень	ценят	российские дипломы MBA, но абитуриенты [Показать структуру]		cenit	NONPREF	AFFIRM	imperfective	no	present	yes	vo	0	np	indef	inanim	pl	nomacc
518	Консультанты	разделили	рынок бизнес- образования на два [Показать структуру]		razdeljat	PREF	AFFIRM	perfective	no	past	yes	vo	0	np	def	inanim	sg	nomacc
519	бизнес- образования (МВА и ЕМВА),	дополняющие	высшее образование. [Показать структуру]	subordinate	dopolnjat	PREF	AFFIRM	imperfective	no	present	participle	vo	0	np	generic	inanim	sg	nomacc
520	Во всем мире не принято	относить	к бизнес- образованию бакалавриат, говорит [Показать структуру]	main	otnosit	PREF	AFFIRM	imperfective	no	nfin	dep_infinitive	vo	1	np	generic	inanim	sg	nomacc
521		Количество	бакалавров, получивших околоэкономические специальности, трудно назвать даже значимым фактором [Показать структуру]	subordinate	polucat	PREF	AFFIRM	perfective	no	past	participle	vo	0	np	indef	inanim	pl	nomacc
522	Федеральный	бюджет	всей российской высшей школы в 2007 г. Волков оценивает в $ 10 млрд [Показать структуру]		ocenivat	PREF	AFFIRM	imperfective	yes	present	yes	ov	7	np	def	inanim	sg	nomacc
523	То есть весь	рынок	можно оценить в $ 20 [Показать структуру]	main	ocenivat	PREF	AFFIRM	perfective	no	nfin	dep_infinitive	ov	1	np	def	inanim	sg	nomacc
524	зашкаливает за 60 %, я	голову	на отсечение не дам". [Показать структуру]		davat	NONPREF	NEGAT	perfective	no	future	yes	ov	2	np	def	inanim	sg	acc
525	Думаю, это соседство	радует	нас в равной степени. [Показать структуру]		radovat	NONPREF	AFFIRM	imperfective	no	present	yes	vo	0	pers_pro	def	anim	pl	acc
526	Мне, конечно, было бы комфортнее	увидеть	возле своей фамилии ну, допустим, Виктора Шейниса [Показать структуру]	main	videt	PREF	AFFIRM	perfective	no	nfin	dep_infinitive	vo	5	name	def	anim	sg	acc
527	быть, твердокаменный Шенин клянется, не	щадя	своей жизни, защищать гражданские свободы [Показать структуру]	subordinate	scadit	NONPREF	NEGAT	imperfective	no	nfin	converb	vo	0	np	def	inanim	sg	gen
528		Усмешку	скептиков разделяю, но лишь [Показать структуру]		razdeljat	PREF	AFFIRM	imperfective	yes	present	yes	ov	1	np	def	inanim	sg	acc
529	куда более экзотические персонажи ассамблеи	перевешивают	в политическом плане Каспарова и [Показать структуру]		perevesivat	PREF	AFFIRM	imperfective	yes	present	yes	vo	2	name	def	anim	sg	acc
530	Они	нарушат	взятые обязательства при первой возможности [Показать структуру]		narusat	PREF	AFFIRM	perfective	no	future	yes	vo	0	np	def	inanim	pl	nomacc
531	по первому свистку, никто не	нарушал	публичных обязательств? [Показать структуру]		narusat	PREF	NEGAT	imperfective	no	past	yes	vo	0	np	indef	inanim	pl	gen
532	известно, лично сталинист Шенин не	отдавал	приказы, повлекшие за собой гибель [Показать структуру]		otdavat	PREF	NEGAT	imperfective	no	past	yes	vo	0	np	def	inanim	pl	nomacc
533	к лимоновским эскападам, Эдуард Вениаминович	ничего	не своровал из бюджета, а [Показать структуру]	main	vorovat	PREF	NEGAT	perfective	no	past	yes	ov	0	neg_pro	indef	inanim	sg	gen
534	Вот текст,	фиксирующий	список правил честной политической игры [Показать структуру]	subordinate	fiksirovat	NONPREF	AFFIRM	imperfective	no	present	participle	vo	0	np	def	inanim	sg	nomacc
535	- В Думе вы	курируете	законотворчество в сфере информационных технологий [Показать структуру]		kurirovat	NONPREF	AFFIRM	imperfective	no	present	yes	vo	0	np	generic	inanim	sg	nomacc
536	На мой взгляд,	выделять	отдельно IT, биотехнологии или что-то [Показать структуру]	main	vydeljat	PREF	AFFIRM	imperfective	yes	nfin	dep_infinitive	vo	1	np	generic	inanim	pl	nomacc
537	Такие	проекты	смогла реализовать Индия - через создание [Показать структуру]	main	realizovyvat	NONPREF	AFFIRM	perfective	no	nfin	dep_infinitive	ov	1	np	def	inanim	pl	nomacc
538	о мерах поддержки IT- индустрии,	которое	он отдал в январе 2005 [Показать структуру]	subordinate	otdavat	PREF	AFFIRM	perfective	no	past	yes	ov	1	relative_pro	def	inanim	sg	nomacc
539	а в январе 2005-го он	провел	совещание в Новосибирске, где было [Показать структуру]		provodit	PREF	AFFIRM	perfective	no	past	yes	vo	0	np	def	inanim	sg	nomacc
540	попытались пойти как раз либеральным путем,	создавая	особые экономические зоны, а это [Показать структуру]	subordinate	sozdavat	PREF	AFFIRM	imperfective	no	nfin	converb	vo	0	np	indef	inanim	pl	nomacc
541	в марте 2006 года правительство	приняло	решение о возврате к изначальной [Показать структуру]		prinimat	PREF	AFFIRM	perfective	no	past	yes	vo	0	np	def	inanim	sg	nomacc
542	К началу 2007 года	отобрали	для них территории. [Показать структуру]		otbirat	PREF	AFFIRM	perfective	no	past	yes	vo	2	np	indef	inanim	pl	nomacc
543	Мордовия, которая	ведет	свой проект, скорее всего присоединится [Показать структуру]		vesti	NONPREF	AFFIRM	imperfective	no	present	yes	vo	0	np	def	inanim	sg	nomacc
544	в отставку министры и депутаты	сравнивают	госслужбу с наркотиком [Показать структуру]		sravnivat	PREF	AFFIRM	imperfective	no	present	yes	vo	0	np	generic	inanim	sg	acc
545	Как	себя	ощущает депутат, который избирался в [Показать структуру]		oscuscat	PREF	AFFIRM	imperfective	no	present	yes	ov	0	refl_pro	def	anim	sg	acc
546	Герман Греф,	покинув	пост главы Минэкономразвития, даже сбрил [Показать структуру]	subordinate	pokidat	PREF	AFFIRM	perfective	no	nfin	converb	vo	0	np	def	inanim	sg	nomacc
547	Да и в целом чиновники,	занимающие	высокие государственные посты, не теряются [Показать структуру]	subordinate	zanimat	PREF	AFFIRM	imperfective	no	present	participle	vo	0	np	indef	inanim	pl	nomacc
548	культуры Александр Соколов всего лишь	возглавляет	диссертационный совет Московской государственной консерватории [Показать структуру]		vozglavljat	PREF	AFFIRM	imperfective	no	present	yes	vo	0	np	def	inanim	sg	nomacc
549	Как они	переносят	разлуку с Государственной Думой, в [Показать структуру]		perenosit	PREF	AFFIRM	imperfective	no	present	yes	vo	0	np	def	inanim	sg	acc
550	"Непримиримый оппозиционер" Дмитрий Рогозин	использует	свою радикальную позицию национал-патриота в [Показать структуру]		ispolzovat	PREF	AFFIRM	imperfective	no	present	yes	vo	0	np	def	inanim	sg	acc
551	Историк Наталья Нарочницкая	возглавляет	Фонд исторической перспективы в России [Показать структуру]		vozglavljat	PREF	AFFIRM	imperfective	no	present	yes	vo	0	np	def	inanim	sg	nomacc
552	большому счету простому человеку трудно	представить	себя в ситуации, когда ты [Показать структуру]		predstavljat	PREF	AFFIRM	perfective	no	nfin	dep_infinitive	vo	0	refl_pro	def	anim	sg	acc
553	НПО им. Лавочкина президент Путин	подводит	итоги думских выборов. [Показать структуру]		podvodit	PREF	AFFIRM	imperfective	no	present	yes	vo	0	np	generic	inanim	pl	nomacc
554		Что	конкретно имел в виду президент, стало [Показать структуру]	main	imet	NONPREF	AFFIRM	imperfective	no	past	yes	ov	1	inter_pro	indef	inanim	sg	nomacc
555	В одном из следующих новостных сюжетов	рассказ	о предстоящем в украинской Раде голосовании по кандидатуре спикера диктор подытожил следующей фразой [Показать структуру]		podytozivat	PREF	AFFIRM	perfective	no	past	yes	ov	9	np	def	inanim	sg	nomacc
556		Списали	новоявленного Че Гевару. [Показать структуру]		spisyvat	PREF	AFFIRM	perfective	no	past	yes	vo	0	np	def	anim	sg	nomacc
557	национальный лидер, который не может	обеспечить	правильного голосования на референдуме? [Показать структуру]	subordinate	obespecivat	PREF	NEGAT	perfective	no	nfin	dep_infinitive	vo	0	np	generic	inanim	sg	gen
558	даже сейчас, Путин мог бы	одолжить	своему южноамериканскому нефтебрату Владислава Суркова [Показать структуру]	main	odalzivat	PREF	AFFIRM	perfective	no	nfin	dep_infinitive	vo	3	name	def	anim	sg	acc
559	чтобы следующий референдум в Венесуэле	дал	нужный результат. [Показать структуру]		davat	NONPREF	AFFIRM	perfective	no	subjunctive	yes	vo	0	np	indef	inanim	sg	nomacc
560	осела, можно оглядеться вокруг и	подвести	кое-какие итоги. [Показать структуру]		podvodit	PREF	AFFIRM	perfective	no	nfin	dep_infinitive	vo	0	np	indef	inanim	pl	nomacc
561	Впрочем, громогласное	заявление	второго человека в партии Ивана Мельникова о том, что в знак протеста левые могут отказаться от своих думских мандатов, я бы всерьез не рассматривал. [Показать структуру]		rassmatrivat	PREF	NEGAT	imperfective	yes	subjunctive	yes	ov	20	np	def	inanim	sg	nomacc
562	коммуниста страны более чем шаткие - он	обещал	партии 90 мест в Думе [Показать структуру]		obescat	NONPREF	AFFIRM	perfective	no	past	yes	vo	1	quant	indef	inanim	pl	nomacc
563	У Венеры	обнаружили	инфракрасное свечение [Показать структуру]		obnaruzyvat	PREF	AFFIRM	perfective	no	past	yes	vo	0	np	indef	inanim	sg	nomacc
564	происходит образование ионов, которые позже	образуют	атомы, испуская электромагнитное излучение в [Показать структуру]		obrazovyvat	PREF	AFFIRM	imperfective	no	present	yes	vo	0	np	generic	inanim	pl	nomacc
565	Ранее исследователям уже удавалось	обнаружить	свечение в атмосфере Венеры. [Показать структуру]	main	obnaruzyvat	PREF	AFFIRM	perfective	no	nfin	dep_infinitive	vo	0	np	indef	inanim	sg	nomacc
566	полагают, что новые результаты помогут	пролить	свет на процессы, происходящие в [Показать структуру]	subordinate	prolivat	PREF	AFFIRM	perfective	no	nfin	dep_infinitive	vo	0	np	generic	inanim	sg	nomacc
567	С другой стороны, аналитики не	разделяют	этого оптимизма. [Показать структуру]		razdeljat	PREF	NEGAT	imperfective	yes	present	yes	vo	0	np	def	inanim	sg	gen
568	Недавно Высшая школа экономики	провела	любопытное исследование. [Показать структуру]		provodit	PREF	AFFIRM	perfective	no	past	yes	vo	0	np	indef	inanim	sg	nomacc
569	российских работодателей, вместо того чтобы	увольнять	персонал… резко режет зарплаты. [Показать структуру]		uvolnjat	PREF	AFFIRM	imperfective	no	nfin	infinitive	vo	0	np	generic	inanim	sg	nomacc
570	еще ничего - две трети безработных	находят	новое место за 8 месяцев [Показать структуру]		nahodit	PREF	AFFIRM	imperfective	no	present	yes	vo	0	np	indef	inanim	sg	nomacc
571	Понятно, что в любой стране	найти	работу с нуля - сложнее всего [Показать структуру]		nahodit	PREF	AFFIRM	perfective	no	nfin	infinitive	vo	0	np	indef	inanim	sg	acc
572	Они	готовят	совсем не тех специалистов, которые [Показать структуру]		gotovit	NONPREF	AFFIRM	imperfective	no	present	yes	vo	2	np	indef	anim	pl	acc
573	А если и	дают	подходящую специальность, то забывают вложить [Показать структуру]		davat	NONPREF	AFFIRM	imperfective	no	present	yes	vo	0	np	indef	inanim	sg	acc
574	Аналитики отмечают, что она	охватывает	далеко не всех. [Показать структуру]	subordinate	ohvatyvat	PREF	AFFIRM	imperfective	no	present	yes	vo	2	def_pro	def	anim	pl	acc
575	ЕГЭ, придуманный, чтобы	исключить	личностный фактор ради объективности в [Показать структуру]	subordinate	isklucat	PREF	AFFIRM	perfective	no	nfin	dep_infinitive	vo	0	np	generic	inanim	sg	nomacc
576	математики Новосибирского государственного технического университета	создали	программу, которая легко переводит учебники [Показать структуру]		sozdavat	PREF	AFFIRM	perfective	no	past	yes	vo	0	np	indef	inanim	sg	acc
577	на телефоне, и вместо текста,	который	читает студент, высвечивается текущее время [Показать структуру]	subordinate	citat	NONPREF	AFFIRM	imperfective	no	present	yes	ov	0	relative_pro	def	inanim	sg	nomacc
578	Другая заинтересованная сторона - те, кто	принимает	экзамены, - пытается отвечать на вызовы [Показать структуру]		prinimat	PREF	AFFIRM	imperfective	no	present	yes	vo	0	np	indef	inanim	pl	nomacc
579		Получить	комментарий из первых рук нам пока не удалось [Показать структуру]	main	polucat	PREF	AFFIRM	perfective	no	nfin	dep_infinitive	vo	0	np	indef	inanim	sg	nomacc
580	пейджинговая компания в Улан-Удэ предлагает	получать	ответы на экзаменационные билеты прямо [Показать структуру]		polucat	PREF	AFFIRM	imperfective	no	nfin	dep_infinitive	vo	0	np	generic	inanim	pl	nomacc
581	Студент физфака Воронежского университета	сконструировал	устройство сначала для себя, потом [Показать структуру]		konstruirovat	PREF	AFFIRM	perfective	no	past	yes	vo	0	np	def	inanim	sg	nomacc
582	При передаче второго радиомикрофона	его	задержали сотрудники ФСБ. [Показать структуру]		zaderzivat	PREF	AFFIRM	perfective	no	past	yes	ov	0	pers_pro	def	anim	sg	acc
583	Эксперт ФСБ	оценил	эти поделки как средство для [Показать структуру]		ocenivat	PREF	AFFIRM	perfective	no	past	yes	vo	0	np	def	inanim	pl	nomacc
584		Инаугурацию	Дмитрия Медведева может омрачить резкий [Показать структуру]	main	omracat	PREF	AFFIRM	perfective	no	nfin	dep_infinitive	ov	3	np	def	inanim	sg	acc
585	Виктор Зубков заявил о необходимости	сократить	импорт мяса. [Показать структуру]		sokrascat	PREF	AFFIRM	perfective	no	nfin	infinitive	vo	0	np	def	inanim	sg	nomacc
586	В МЭРТе не	видят	необходимости в продлении заморозки цен [Показать структуру]		videt	NONPREF	NEGAT	imperfective	no	present	yes	vo	0	np	def	inanim	sg	gen
587	По его словам, эта мера	имела	эффект в конце прошлого года [Показать структуру]		imet	NONPREF	AFFIRM	imperfective	no	past	yes	vo	0	np	generic	inanim	sg	nomacc
588	Также чиновник не считает целесообразным	вводить	какие-то ограничения на экспорт товаров [Показать структуру]		vvodit	PREF	AFFIRM	imperfective	no	nfin	infinitive	vo	0	np	indef	inanim	pl	nomacc
589	Ранее сходную	позицию	высказывал Минсельхоз. [Показать структуру]		vyskazyvat	PREF	AFFIRM	imperfective	no	past	yes	ov	0	np	indef	inanim	sg	acc
590	в четверг о намерениях правительства	изменить	порядок распределения тарифных квот на [Показать структуру]		izmenjat	PREF	AFFIRM	perfective	no	nfin	infinitive	vo	0	np	def	inanim	sg	nomacc
591		Решать	эту задачу премьер пообещал с [Показать структуру]	main	resat	NONPREF	AFFIRM	imperfective	no	nfin	dep_infinitive	vo	0	np	def	inanim	sg	acc
592	Первое время	их	еще будет тянуть друг к [Показать структуру]		tjanut	NONPREF	AFFIRM	imperfective	no	nfin	dep_infinitive	ov	2	pers_pro	def	anim	pl	acc
593	один из самых ценных активов,	которые	можно вынести из школы. [Показать структуру]	subordinate	vynosit	PREF	AFFIRM	perfective	no	nfin	dep_infinitive	ov	1	relative_pro	def	inanim	pl	nomacc
594		Сохранив	детскую дружбу, можно значительно увеличить [Показать структуру]	subordinate	sohranjat	PREF	AFFIRM	perfective	no	nfin	converb	vo	0	np	generic	inanim	sg	acc
595	Американцы полагают, что хорошие	дивиденды	школьная дружба дает биржевым аналитикам [Показать структуру]		davat	NONPREF	AFFIRM	imperfective	no	present	yes	ov	2	np	generic	inanim	pl	nomacc
596	Они занимаются тем, что	изучают	деятельность компаний и выдают рекомендации [Показать структуру]		izucat	PREF	AFFIRM	imperfective	yes	present	yes	vo	0	np	generic	inanim	sg	nomacc
597	Обычно эксперты	получают	информацию из общедоступных источников - финансовой [Показать структуру]		polucat	PREF	AFFIRM	imperfective	no	present	yes	vo	0	np	generic	inanim	sg	acc
598	он может в неформальной беседе	рассказать	другу те сведения, которые еще [Показать структуру]		rasskazyvat	PREF	AFFIRM	perfective	no	nfin	dep_infinitive	vo	1	np	indef	inanim	sg	acc
599	по которым один из аналитиков	давал	рекомендацию покупать, имея связи в [Показать структуру]		davat	NONPREF	AFFIRM	imperfective	no	past	yes	vo	0	np	indef	inanim	sg	acc
600	к покупке "обыкновенных" акций компаний,	превзошел	эталон лишь на 0,01 % [Показать структуру]		prevoshodit	PREF	AFFIRM	perfective	no	past	yes	vo	0	np	def	inanim	sg	nomacc
601	среднем игрок мог бы легко	зарабатывать	5,4 % годовых, зная список [Показать структуру]		zarabatyvat	PREF	AFFIRM	imperfective	yes	nfin	dep_infinitive	vo	0	quant	indef	inanim	pl	nomacc
602	Так что	налоги	можно снижать как минимум на 1 [Показать структуру]	main	snizat	PREF	AFFIRM	imperfective	no	nfin	dep_infinitive	ov	1	np	generic	inanim	pl	nomacc
603	Госдума по предложению Министерства финансов	пересмотрела	параметры трехлетнего бюджета. [Показать структуру]		peresmatrivat	PREF	AFFIRM	perfective	no	past	yes	vo	0	np	def	inanim	pl	nomacc
604	При первом пересмотре бюджета мы	увеличили	прогнозы внутреннего валового продукта на [Показать структуру]		uvelicivat	PREF	AFFIRM	perfective	no	past	yes	vo	0	np	def	inanim	pl	nomacc
605	в бюджет в 2010 году	составят	примерно 700 миллиардов рублей. [Показать структуру]		sostavljat	PREF	AFFIRM	perfective	no	future	yes	vo	1	quant	indef	inanim	pl	nomacc
606	Прежде всего эксперты ЦСКП	рассматривают	вопрос о снижении налога на [Показать структуру]		rassmatrivat	PREF	AFFIRM	imperfective	yes	present	yes	vo	0	np	def	inanim	sg	nomacc
607	препятствием для экономической деятельности, нужно	рассмотреть	вопрос о замене этого налога [Показать структуру]		rassmatrivat	PREF	AFFIRM	perfective	no	nfin	dep_infinitive	vo	0	np	def	inanim	sg	nomacc
608	и поддержке предпринимательства Борис Титов	озвучил	в своем выступлении цифры, которые едва ли можно назвать оптимистическими. [Показать структуру]		ozvucivat	PREF	AFFIRM	perfective	no	past	yes	vo	2	np	def	inanim	pl	nomacc
609	Это и	определило	место России во второй сотне [Показать структуру]		opredeljat	PREF	AFFIRM	perfective	no	past	yes	vo	0	np	indef	inanim	sg	nomacc
610	когда было даже как-то неприлично	платить	все налоги в бюджет. [Показать структуру]		platit	NONPREF	AFFIRM	imperfective	no	nfin	infinitive	vo	0	np	def	inanim	pl	nomacc
611	Абсолютное большинство компаний	оплачивают	налоги в бюджет. [Показать структуру]		oplacivat	PREF	AFFIRM	imperfective	yes	present	yes	vo	0	np	generic	inanim	pl	nomacc
612	Проректор ГУ-ВШЭ Андрей Яковлев	принял	участие в заседании Экономического клуба [Показать структуру]		prinimat	PREF	AFFIRM	perfective	no	past	yes	vo	0	np	generic	inanim	sg	nomacc
613	Остается ответить на главный вопрос: "	Что	делать?". [Показать структуру]	main	delat	NONPREF	AFFIRM	imperfective	no	nfin	infinitive	ov	0	inter_pro	indef	inanim	sg	nomacc
614	В дискуссии	приняли	участие зампред госкорпорации "Банк развития [Показать структуру]		prinimat	PREF	AFFIRM	perfective	no	past	yes	vo	0	np	generic	inanim	sg	nomacc
615	предложено сыграть в деловую игру:	поставить	себя на место президента или [Показать структуру]		stavit	PREF	AFFIRM	perfective	no	nfin	infinitive	vo	0	refl_pro	def	anim	sg	acc
616	Мы	публикуем	фрагменты наиболее интересных, на наш [Показать структуру]		publikovat	NONPREF	AFFIRM	imperfective	no	present	yes	vo	0	np	indef	inanim	pl	nomacc
617	Неправильно	связывать	нашу программу с новой конфигурацией [Показать структуру]	main	svjazyvat	PREF	AFFIRM	imperfective	no	nfin	dep_infinitive	vo	0	np	def	inanim	sg	acc
618	Я	помню	время работы в правительстве: в связи с [Показать структуру]		pomnit	PREF	AFFIRM	imperfective	no	present	yes	vo	0	np	def	inanim	sg	nomacc
619	чего начать, то я бы	поставил	на первое место реформу судебной [Показать структуру]		stavit	PREF	AFFIRM	perfective	no	subjunctive	yes	vo	3	np	generic	inanim	sg	acc
620	ли, а только после этого	оценивают	качество экономического законодательства в более [Показать структуру]		ocenivat	PREF	AFFIRM	imperfective	yes	present	yes	vo	0	np	generic	inanim	sg	nomacc
621	Мы пока не	получили	от этого никаких результатов. [Показать структуру]		polucat	PREF	NEGAT	perfective	no	past	yes	vo	2	np	indef	inanim	pl	gen
622	что даже непроизнесенное слово - мысль -	имеет	немалую силу. [Показать структуру]		imet	NONPREF	AFFIRM	imperfective	no	present	yes	vo	0	np	indef	inanim	sg	acc
623	скамьи мы знаем: наша планета	имеет	форму вытянутого на полюсах шара [Показать структуру]		imet	NONPREF	AFFIRM	imperfective	no	present	yes	vo	0	np	generic	inanim	sg	acc
624		Доказать	эту теорию Луговенко берется с помощью [Показать структуру]	main	dokazyvat	PREF	AFFIRM	perfective	no	nfin	dep_infinitive	vo	0	np	def	inanim	sg	acc
625		Что	это значит? [Показать структуру]	main	znacit	NONPREF	AFFIRM	perfective	no	present	yes	ov	1	inter_pro	indef	inanim	sg	nomacc
626	ученых - Ферми, Паста и Улам -	исследовали	так называемые нелинейные системы, которые [Показать структуру]		issledovat	PREF	AFFIRM	imperfective	no	past	yes	vo	1	np	indef	inanim	pl	nomacc
627	Классический пример - молекула ДНК, которая	хранит	генетическую информацию животных и растительных [Показать структуру]		hranit	NONPREF	AFFIRM	imperfective	no	present	yes	vo	0	np	generic	inanim	sg	acc
628	вопрос: как неразумная молекула, не	имеющая	ни мозга, ни нервной системы [Показать структуру]	subordinate	imet	NONPREF	NEGAT	imperfective	no	present	participle	vo	1	np	indef	inanim	sg	gen
629	Ученые констатировали, что они	ведут	себя подобно разумным существам, но [Показать структуру]		vesti	NONPREF	AFFIRM	imperfective	no	present	yes	vo	0	refl_pro	def	anim	pl	acc
630	С тех пор ученые	рассматривают	ее механизмы со все большей [Показать структуру]		rassmatrivat	PREF	AFFIRM	imperfective	yes	present	yes	vo	1	np	def	inanim	pl	nomacc
631	техники секвенирования в сотни раз	ускорили	процесс расшифровки последовательностей ДНК - и [Показать структуру]		uskorjat	PREF	AFFIRM	perfective	no	past	yes	vo	0	np	generic	inanim	sg	nomacc
632	Теперь они	изучают	не только особенности человеческого генома [Показать структуру]		izucat	PREF	AFFIRM	imperfective	yes	present	yes	vo	2	np	indef	inanim	pl	nomacc
633	разных людей позволит не только	обозначить	набор, характерный для людей с [Показать структуру]		oboznacat	PREF	AFFIRM	perfective	no	nfin	dep_infinitive	vo	0	np	generic	inanim	sg	nomacc
634	прорыву в медицине, когда врачи,	изучив	индивидуальную карту генома пациента, смогут [Показать структуру]	subordinate	izucat	PREF	AFFIRM	perfective	no	nfin	converb	vo	0	np	generic	inanim	sg	acc
635	Вот уже больше десяти лет	генетиков	будоражит пример знаменитой овечки Долли [Показать структуру]		budorazit	NONPREF	AFFIRM	imperfective	no	present	yes	ov	0	np	generic	inanim	sg	acc
636	настоящей проблемы такая: можно ли,	взяв	генетический материал незрелой яйцеклетки, "омолодить [Показать структуру]	subordinate	brat	PREF	AFFIRM	perfective	no	nfin	converb	vo	0	np	indef	inanim	sg	nomacc
637	То есть -	взять	любую, а не только стволовую клетку и из нее вырастить новый организм? [Показать структуру]		brat	PREF	AFFIRM	perfective	no	nfin	infinitive	vo	0	np	indef	inanim	sg	acc
638	прессе появился целый ряд публикаций,	описывающих	такое достижение: внедрив в обыкновенные [Показать структуру]	subordinate	opisyvat	PREF	AFFIRM	imperfective	yes	present	participle	vo	0	np	generic	inanim	sg	nomacc
639	что правительство по предложению Минэкономразвития	увеличивает	верхнюю планку своего годового прогноза [Показать структуру]		uvelicivat	PREF	AFFIRM	imperfective	no	present	yes	vo	0	np	def	inanim	sg	acc
640	"Минэкономразвития	предложило	прогноз, что в связи с высокой волатильностью [Показать структуру]		predlagat	PREF	AFFIRM	perfective	no	past	yes	vo	0	np	indef	inanim	sg	nomacc
641	инфляция будет 9,5 %, мы	увеличиваем	неопределенность прогноза", - пояснил вице-премьер. [Показать структуру]		uvelicivat	PREF	AFFIRM	imperfective	no	present	yes	vo	0	np	def	inanim	sg	nomacc
642	неопределенная ситуация на финансовых рынках	заставила	Минфин быть осторожнее. [Показать структуру]		zastavljat	PREF	AFFIRM	perfective	no	past	yes	vo	0	name	def	inanim	sg	nomacc
643	В прошлом году, помнится,	прогноз	по инфляции власти повысили лишь [Показать структуру]		povysat	PREF	AFFIRM	perfective	no	past	yes	ov	3	np	def	inanim	sg	nomacc
644	К тому же	сложность	прогнозирования инфляции в нынешних условиях в середине марта отмечала и ФРС США. [Показать структуру]		otmecat	PREF	AFFIRM	imperfective	yes	past	yes	ov	6	np	generic	inanim	sg	nomacc
645	в первом квартале правительство бросилось	пересматривать	свои прогнозы? [Показать структуру]	main	peresmatrivat	PREF	AFFIRM	imperfective	yes	nfin	dep_infinitive	vo	0	np	def	inanim	pl	nomacc
646	рынке, надо было бы просто	расширить	диапазон оценки, опустив и нижнюю [Показать структуру]		rassirjat	PREF	AFFIRM	perfective	no	nfin	dep_infinitive	vo	0	np	def	inanim	sg	nomacc
647	на второй план, пришла пора	скорректировать	позицию правительства с учетом экономических [Показать структуру]		korrektirovat	PREF	AFFIRM	perfective	no	nfin	dep_infinitive	vo	0	np	def	inanim	sg	acc
648	У дверей школы ребята	загрузили	в учительскую машину свои тяжелые рюкзаки [Показать структуру]		zagruzat	PREF	AFFIRM	perfective	no	past	yes	vo	2	np	def	inanim	sg	nomacc
649	Там учитель	припарковал	свою машину, ребята разобрали рюкзаки [Показать структуру]		parkovat	PREF	AFFIRM	perfective	no	past	yes	vo	0	np	def	inanim	sg	acc
650	он, наверное, не очень удачно	припарковал	стального коня, Евгений Александрович законопослушно [Показать структуру]		parkovat	PREF	AFFIRM	perfective	no	past	yes	vo	0	np	def	anim	sg	acc
651		Возбудили	уголовное дело, позвонили (теперь уже [Показать структуру]		vozbuzdat	PREF	AFFIRM	perfective	no	past	yes	vo	0	np	indef	inanim	sg	nomacc
652	О чем милиционеры добросовестно	составили	рапорт. [Показать структуру]		sostavljat	PREF	AFFIRM	perfective	no	past	yes	vo	0	np	indef	inanim	sg	nomacc
653	сказали, что для проформы надо	подшить	к делу письменный ответ эвакослужбы [Показать структуру]	subordinate	podsivat	PREF	AFFIRM	perfective	no	nfin	dep_infinitive	vo	1	np	indef	inanim	sg	nomacc
654	Однако не извинились и	машину	не отдали. [Показать структуру]		otdavat	PREF	NEGAT	perfective	no	past	yes	ov	1	np	def	inanim	sg	acc
655	ту же неудобопроизносимую ГСПТС, чтобы	его	освободили от платы хотя бы до [Показать структуру]		osvobozdat	PREF	AFFIRM	perfective	no	subjunctive	yes	ov	0	pers_pro	def	anim	sg	acc
656		Что	хочет показать Медведев? [Показать структуру]	main	pokazyvat	PREF	AFFIRM	perfective	no	nfin	dep_infinitive	ov	0	inter_pro	indef	inanim	sg	nomacc
657	Я - юрист, "	подловить	" меня на словах невозможно. [Показать структуру]		podlavlivat	PREF	AFFIRM	perfective	no	nfin	dep_infinitive	vo	0	pers_pro	def	anim	sg	acc
658	Пока что Медведев	обещает	одно, о чем и говорилось [Показать структуру]		obescat	PREF	AFFIRM	imperfective	no	present	yes	vo	0	np	def	inanim	sg	nomacc
659	Знаковый вопрос:	отпустят	Ходорковского? [Показать структуру]	main	otpuskat	PREF	AFFIRM	perfective	no	future	yes	vo	0	name	def	anim	sg	acc
660		Расширят	ли свободу СМИ? [Показать структуру]		rassirjat	PREF	AFFIRM	perfective	no	future	yes	vo	1	np	generic	inanim	sg	acc
661	по закону разрешено брать и	давать	взятки? [Показать структуру]		davat	NONPREF	AFFIRM	imperfective	no	nfin	dep_infinitive	vo	1	np	generic	inanim	pl	nomacc
662	диссидентов был, как известно, лозунг "	Соблюдайте	СВОЮ Конституцию!". [Показать структуру]		sobljudat	PREF	AFFIRM	imperfective	yes	imperative	yes	vo	0	np	def	inanim	sg	acc
663	вы, господа, докажите, что мы	ее	НЕ соблюдаем! [Показать структуру]		sobljudat	PREF	NEGAT	imperfective	yes	present	yes	ov	1	pers_pro	def	anim	sg	acc
664	Где, кому, как вы	это	будете доказывать… [Показать структуру]	main	dokazyvat	PREF	AFFIRM	imperfective	no	nfin	dep_infinitive	ov	1	dem_pro	def	inanim	sg	nomacc
665	Пока что Медведев почти	ничего	не сказал - толкуй, как хочешь [Показать структуру]	main	govorit	PREF	NEGAT	perfective	no	past	yes	ov	0	neg_pro	indef	inanim	sg	gen
666		Вел	дискуссию Михаил Делягин. [Показать структуру]		vesti	NONPREF	AFFIRM	imperfective	no	past	yes	vo	0	np	def	inanim	sg	acc
667		Открывая	ее, он отметил, что реформа [Показать структуру]	subordinate	otkryvat	PREF	AFFIRM	imperfective	no	nfin	converb	vo	0	pers_pro	def	inanim	sg	acc
668	же время конкретные положения реформы	вызывают	многочисленные и постоянно растущие нарекания [Показать структуру]		vyzyvat	PREF	AFFIRM	imperfective	yes	present	yes	vo	0	np	indef	inanim	pl	nomacc
669	соответствия требованиям рынка труда, не	сдает	свои позиции коррупция, нормативы ЕГЭ [Показать структуру]		sdavat	PREF	NEGAT	imperfective	no	present	yes	vo	0	np	def	inanim	pl	nomacc
670	Практика реформ последовательно	отрицает	тот факт, что она не [Показать структуру]		otricat	PREF	AFFIRM	imperfective	no	present	yes	vo	0	np	indef	inanim	sg	nomacc
671		Передавая	слово Е. Гонтмахеру, М. Делягин [Показать структуру]	subordinate	peredavat	PREF	AFFIRM	imperfective	no	nfin	converb	vo	0	np	generic	inanim	sg	nomacc
672	заявил, что реформа образования не	разрушила	до конца то зло и [Показать структуру]		razrusat	PREF	NEGAT	perfective	no	past	yes	vo	2	np	indef	inanim	sg	nomacc
673	компьютер находится за широкой спиной материально ответственной "учителки", которая буквально	держит	его под замком, так как боится [Показать структуру]		derzat	NONPREF	AFFIRM	imperfective	no	present	yes	vo	0	pers_pro	def	inanim	sg	acc
674	дискуссии полюсами - оно и не	готовит	граждан, и не делает их [Показать структуру]		gotovit	NONPREF	NEGAT	imperfective	no	present	yes	vo	0	np	indef	anim	pl	gen
675	учеником" и ЕГЭ вовсе не	изменили	сути образовательного процесса, а количество [Показать структуру]		izmenjat	PREF	NEGAT	perfective	no	past	yes	vo	0	np	def	inanim	sg	gen
676		Открывая	пленарное заседание, ректор РГГУ, член-корреспондент [Показать структуру]	subordinate	otkryvat	PREF	AFFIRM	imperfective	no	nfin	converb	vo	0	np	def	inanim	sg	nomacc
677	между Россией и США, и	отметил	особую важность образа Авраама Линкольна [Показать структуру]		otmecat	PREF	AFFIRM	perfective	no	past	yes	vo	0	np	def	inanim	sg	acc
678	в РФ Джон Байерли, впервые	посетивший	РГГУ в этом качестве, высоко [Показать структуру]	subordinate	posescat	PREF	AFFIRM	perfective	no	past	participle	vo	0	name	def	inanim	sg	nomacc
679	Много лет	изучавший	историю и культуру России Джон [Показать структуру]	subordinate	izucat	PREF	AFFIRM	imperfective	yes	past	participle	vo	0	np	def	inanim	sg	acc
680	Honoris Causa" РГГУ И. Уайл	поблагодарил	всех, кто внес свой вклад [Показать структуру]	main	blagodarit	PREF	AFFIRM	perfective	no	past	yes	vo	0	all	def	anim	pl	acc
681	Он	отметил	влияние, оказанное выдающимся политиком и [Показать структуру]		otmecat	PREF	AFFIRM	perfective	no	past	yes	vo	0	np	def	inanim	sg	nomacc
682	для развития международных контактов, и	отметил	необычайную важность того, что и [Показать структуру]		otmecat	PREF	AFFIRM	perfective	no	past	yes	vo	0	np	def	inanim	sg	acc
683	подчеркнув, что в разных странах	его	сравнивают с наиболее яркими политическими [Показать структуру]		sravnivat	PREF	AFFIRM	imperfective	no	present	yes	ov	0	pers_pro	def	anim	sg	acc
684	с РГГУ и подтвердила готовность	развивать	новые совместные проекты. [Показать структуру]		razvivat	PREF	AFFIRM	imperfective	no	nfin	infinitive	vo	0	np	indef	inanim	pl	nomacc
685		Гипс	снимают, клиент уезжает!" [Показать структуру]		snimat	PREF	AFFIRM	imperfective	no	present	yes	ov	0	np	generic	inanim	sg	nomacc
686	Тем не менее, точный	диагноз	покажет лишь вскрытие. [Показать структуру]		pokazyvat	PREF	AFFIRM	perfective	no	future	yes	ov	0	np	def	inanim	sg	nomacc
687	Одни советуют	выводить	деньги из США и вкладываться [Показать структуру]	main	vyvodit	PREF	AFFIRM	imperfective	no	nfin	dep_infinitive	vo	0	np	generic	inanim	pl	nomacc
688	Не буду	увеличивать	эту энтропию оценок - не в [Показать структуру]	main	uvelicivat	NONPREF	NEGAT	imperfective	no	nfin	dep_infinitive	vo	0	np	def	inanim	sg	acc
689	И	смысла	ее менять пока что не вижу. [Показать структуру]		videt	NONPREF	NEGAT	imperfective	no	present	yes	ov	0	np	def	inanim	sg	gen
690	Просто всем это безразлично,	см.	пункт один. [Показать структуру]		smotret	NONPREF	AFFIRM	imperfective	no	imperative	yes	vo	0	np	def	inanim	sg	nomacc
691	Во-вторых,	значение	этой харизмы я бы тоже не преувеличивал [Показать структуру]		preuvelicivat	PREF	NEGAT	imperfective	no	subjunctive	yes	ov	5	np	def	inanim	sg	nomacc
692	что там бессильная оппозиция, кто	ее	вообще в упор увидит! [Показать структуру]		videt	PREF	AFFIRM	perfective	no	future	yes	ov	2	pers_pro	def	anim	sg	acc
693		Путина	любят, как талисман на счастье [Показать структуру]		lubit	NONPREF	AFFIRM	imperfective	no	present	yes	ov	0	name	def	anim	sg	acc
694	власти, как он там "переизбирается",	кого	избирает "преемником", какие там и [Показать структуру]	subordinate	izbirat	PREF	AFFIRM	imperfective	yes	present	yes	ov	0	inter_pro	indef	anim	sg	acc
695	Ректор ГУ-ВШЭ Ярослав Кузьминов	примет	участие в открывающемся 6 июня [Показать структуру]		prinimat	PREF	AFFIRM	perfective	no	future	yes	vo	0	np	generic	inanim	sg	nomacc
696	как, на ваш взгляд, можно	решить	проблему нехватки квалифицированных кадров в [Показать структуру]		resat	NONPREF	AFFIRM	perfective	no	nfin	dep_infinitive	vo	0	np	def	inanim	sg	acc
697	а в развитых странах он	составляет	5- 6 % ВВП. [Показать структуру]		sostavljat	PREF	AFFIRM	imperfective	no	present	yes	vo	0	quant	indef	inanim	pl	nomacc
698	Нам надо в течение нескольких лет	довести	финансирование образования (начиная с дошкольного [Показать структуру]	main	dovodit	PREF	AFFIRM	perfective	no	nfin	dep_infinitive	vo	0	np	def	inanim	sg	nomacc
699	вполне можем за три года	увеличить	вклад государства в финансирование общеобразовательной [Показать структуру]		uvelicivat	PREF	AFFIRM	perfective	no	nfin	dep_infinitive	vo	0	np	def	inanim	sg	nomacc
700	Кроме того, мы должны	создавать	возможности для инновационного бизнеса и [Показать структуру]	main	sozdvat	PREF	AFFIRM	imperfective	no	nfin	dep_infinitive	vo	0	np	indef	inanim	pl	nomacc
701	креативного сектора экономики, где работа	имеет	творческий характер, а, следовательно, требует [Показать структуру]		imet	NONPREF	AFFIRM	imperfective	no	present	yes	vo	0	np	indef	inanim	sg	nomacc
702	Поэтому сейчас очень важно не	совершить	ошибку и, инвестируя в перспективные [Показать структуру]	main	soversat	PREF	NEGAT	perfective	no	nfin	dep_infinitive	vo	0	np	indef	inanim	sg	acc
703	- Никакие инновации не могут	проложить	себе путь там, где отсутствует [Показать структуру]	main	prokladyvat	PREF	AFFIRM	perfective	no	nfin	dep_infinitive	vo	1	np	generic	inanim	sg	nomacc
704	Люди,	создающие	новые продукты и новые идеи [Показать структуру]	subordinate	sozdavat	PREF	AFFIRM	imperfective	no	present	participle	vo	0	np	indef	inanim	pl	nomacc
705	университету - Высшей школе экономики предписано	поставить	эксперимент на себе. [Показать структуру]		stavit	PREF	AFFIRM	perfective	no	nfin	dep_infinitive	vo	0	np	indef	inanim	sg	nomacc
706	автономных учреждениях, первым в России	сменит	свой статус. [Показать структуру]		menjat	PREF	AFFIRM	perfective	no	future	yes	vo	0	np	def	inanim	sg	nomacc
707	обнародовано постановление Владимира Путина, который	перевел	вуз "под крыло правительства". [Показать структуру]		perevodit	PREF	AFFIRM	perfective	no	past	yes	vo	0	np	def	inanim	sg	nomacc
708	Прямое подчинение Белому дому	открывает	университету более широкий доступ к [Показать структуру]		otkryvat	PREF	AFFIRM	imperfective	no	present	yes	vo	2	np	def	inanim	sg	nomacc
709	О том, какие	задачи	ставит кабинет министров перед первым [Показать структуру]		stavit	NONPREF	AFFIRM	imperfective	no	present	yes	ov	0	np	indef	inanim	pl	nomacc
710	правительстве означает, что ученые вуза	осуществляют	экспертно-аналитическую поддержку в выработке решений [Показать структуру]		osuscestvljat	PREF	AFFIRM	imperfective	no	present	yes	vo	0	np	generic	inanim	sg	acc
711	нами поставлена очень большая задача -	обеспечить	конкурентоспособность университета по отношению к ведущим западным [Показать структуру]		obespecivat	PREF	AFFIRM	perfective	no	nfin	infinitive	vo	0	np	generic	inanim	sg	nomacc
712	-	Дает	ли статус "при правительстве" новые возможности, которых у вуза не было ранее? [Показать структуру]		davat	NONPREF	AFFIRM	imperfective	no	present	yes	vo	4	np	indef	inanim	pl	nomacc
713		Обязанности	- да : то, что раньше мы делали на инициативной основе [Показать структуру]	subordinate	delat	NONPREF	AFFIRM	imperfective	no	past	yes	ov	2	relative_pro	def	inanim	sg	nomacc
714	Консенсус на почве неприятия ЕГЭ	объединил	все СМИ, правые и левые [Показать структуру]		objedinjat	PREF	AFFIRM	perfective	no	past	yes	vo	0	np	def	inanim	pl	nomacc
715	с таким же единодушием все	осуждали	Чикатило. [Показать структуру]		osuzdat	PREF	AFFIRM	imperfective	yes	past	yes	vo	0	name	def	anim	sg	nomacc
716	Мы все	узнали	о ЕГЭ массу ужасов. [Показать структуру]		uznavat	PREF	AFFIRM	perfective	no	past	yes	vo	2	np	indef	inanim	sg	acc
717	Мы узнали, что 25 %	сдавших	его получили двойки по математике [Показать структуру]	subordinate	sdavat	PREF	AFFIRM	perfective	no	past	participle	vo	0	pers_pro	def	inanim	sg	acc
718	(Видимо, когда они	сдают	не ЕГЭ, они всем этим не пользуются. [Показать структуру]		sdavat	PREF	AFFIRM	imperfective	no	present	yes	vo	1	np	generic	inanim	sg	nomacc
719	Особенно	меня	умилил пример Дагестана, где школьники [Показать структуру]		umiljat	PREF	AFFIRM	perfective	no	past	yes	ov	0	pers_pro	def	anim	sg	acc
720	горных селах Унцукуля и Чароды	считать	уровень образования от уровня моря [Показать структуру]		scitat	PREF	AFFIRM	imperfective	no	nfin	infinitive	vo	0	np	generic	inanim	sg	nomacc
721	Мы	имеем	тотально коррумпированную систему образования. [Показать структуру]		imet	NONPREF	AFFIRM	imperfective	no	present	yes	vo	1	np	generic	inanim	sg	acc
722	Самые приличные из вузов пытаются	совместить	взятку с реальной услугой: профессора [Показать структуру]	main	sovmescat	PREF	AFFIRM	perfective	no	nfin	dep_infinitive	vo	0	np	generic	inanim	sg	acc
723	Эту	систему	следует признать главным вкладом академика [Показать структуру]	main	priznavat	PREF	AFFIRM	perfective	no	nfin	dep_infinitive	ov	1	np	def	inanim	sg	acc
724	Россия не	видит	перспектив присоединения к ВТО в [Показать структуру]		videt	NONPREF	NEGAT	imperfective	no	present	yes	vo	0	np	indef	inanim	pl	gen
725	А поскольку наша страна	несет	обременения по некоторым соглашениям в [Показать структуру]		nesti	NONPREF	AFFIRM	imperfective	no	present	yes	vo	0	np	indef	inanim	pl	nomacc
726	Россияне скоро	ощутят	последствия этого шага: в магазинах [Показать структуру]		oscuscat	PREF	AFFIRM	perfective	no	future	yes	vo	0	np	def	inanim	pl	nomacc
727	Шувалов заявил, что правительство не	видит	перспектив присоединения к ВТО в течение [Показать структуру]		videt	NONPREF	NEGAT	imperfective	no	present	yes	vo	0	np	indef	inanim	pl	gen
728	в надежде на скорое присоединение	взяла	на себя ряд чувствительных обязательств [Показать структуру]		brat	PREF	AFFIRM	perfective	no	past	yes	vo	2	np	indef	inanim	sg	nomacc
729	Но Россия не стала членом ВТО в обещанные ей сроки, а	обязательства	и ограничения несет, и это никуда не годится. [Показать структуру]		nesti	NONPREF	AFFIRM	imperfective	no	present	yes	ov	0	np	indef	inanim	pl	nomacc
730	Что, однако,	подтолкнуло	Москву к осознанию этих реалий [Показать структуру]	subordinate	podtalkivat	PREF	AFFIRM	perfective	no	past	yes	vo	0	name	def	inanim	sg	acc
731	Карлоса Гутьерреса о том, что "	Россию	ждут проблемы при присоединении к [Показать структуру]	subordinate	zdat	NONPREF	AFFIRM	imperfective	no	present	yes	ov	0	name	def	inanim	sg	acc
732	Шувалов	высказал	сожаление по поводу этого заявления и [Показать структуру]		vyskazyvat	PREF	AFFIRM	perfective	no	past	yes	vo	0	np	generic	inanim	sg	nomacc
733	С другой стороны,	вызывает	удивление, что уважаемый торгпред США [Показать структуру]		vyzyvat	PREF	AFFIRM	imperfective	yes	present	yes	vo	0	np	generic	inanim	sg	nomacc
734	Но "	строителей	" это нисколько не расстроило. [Показать структуру]		rasstraivat	PREF	NEGAT	perfective	no	past	yes	ov	2	np	def	anim	pl	acc
735	удивительное небесное скопление: 357 человек	образовали	гигантский небесный "цветок", выполненный в [Показать структуру]		obrazovyvat	PREF	AFFIRM	perfective	no	past	yes	vo	0	np	indef	inanim	sg	nomacc
736	свободном падении берутся за руки,	образуя	фигуры. [Показать структуру]	subordinate	obrazovyvat	PREF	AFFIRM	imperfective	no	nfin	converb	vo	0	np	indef	inanim	pl	nomacc
737	Подготовка к рекорду	заняла	у организатора и вдохновителя формации Би Джей Ворта и его международной команды World Team почти 15 месяцев. [Показать структуру]		zanimat	PREF	AFFIRM	perfective	no	past	yes	vo	12	quant	indef	inanim	pl	nomacc
738	участники съехались в Таиланд и	начали	совместные тренировки (обычно 3- 4 [Показать структуру]		nacinat	PREF	AFFIRM	perfective	no	past	yes	vo	0	np	generic	inanim	pl	nomacc
739	друг от друга - такой строй	обеспечивает	наибольшую компактность выброски (с учетом [Показать структуру]		obespecivat	PREF	AFFIRM	imperfective	no	present	yes	vo	0	np	generic	inanim	sg	acc
740	кислорода на такой высоте мозг	испытывает	гипоксию (кислородное голодание) и люди [Показать структуру]		ispytyvat	PREF	AFFIRM	imperfective	yes	present	yes	vo	0	np	generic	inanim	sg	acc
741	и опоздание в 15 секунд	означает	ошибку выброски больше чем на километр [Показать структуру]		oznacat	PREF	AFFIRM	imperfective	yes	present	yes	vo	0	np	indef	inanim	sg	acc
742	съехались около 11 тыс. участников,	представлявших	различные национальные и международные организации [Показать структуру]	subordinate	predstavljat	PREF	AFFIRM	imperfective	no	present	participle	vo	0	np	indef	inanim	pl	nomacc
743	обсуждение вопроса о том, какую	пользу	мировое сообщество может извлечь из [Показать структуру]	subordinate	izvlekat	PREF	AFFIRM	perfective	no	nfin	dep_infinitive	ov	3	np	generic	inanim	sg	acc
744	изменения информационных и коммуникационных технологий	оказывают	огромное влияние на все стороны [Показать структуру]		okazyvat	PREF	AFFIRM	imperfective	no	present	yes	vo	0	np	generic	inanim	sg	nomacc
745		Открывая	форум, Генеральный секретарь ООН Кофи [Показать структуру]	subordinate	otkryvat	PREF	AFFIRM	imperfective	no	nfin	converb	vo	0	np	def	inanim	sg	nomacc
746	Но эти преимущества информационного общества,	сулящие	огромные выгоды человечеству, не смогут [Показать структуру]	subordinate	sulit	NONPREF	AFFIRM	imperfective	no	present	participle	vo	0	np	indef	inanim	pl	nomacc
747	На ней предполагается	оценить	достигнутое и определить первоочередные нужды [Показать структуру]	main	ocenivat	PREF	AFFIRM	perfective	no	nfin	dep_infinitive	vo	0	np	def	inanim	sg	nomacc
748	Большую	роль	в подготовке и проведении форума сыграли многочисленные международные [Показать структуру]		igrat	PREF	AFFIRM	perfective	no	past	yes	ov	3	np	indef	inanim	sg	acc
749		Их	будут обсуждать и в августе [Показать структуру]		obsuzdat	PREF	AFFIRM	imperfective	yes	nfin	dep_infinitive	ov	1	pers_pro	def	inanim	pl	acc
750	Ашбахер рассказал, в частности, о вкладе,	который	уже сегодня вносят спутники ЕКА [Показать структуру]	subordinate	vnosit	PREF	AFFIRM	imperfective	no	present	yes	ov	2	relative_pro	def	inanim	sg	nomacc
751	Предвыборную	ситуацию	в интервью Радио Свобода оценивает [Показать структуру]		ocenivat	PREF	AFFIRM	imperfective	yes	present	yes	ov	4	np	def	inanim	sg	acc
752	общем- то, уже состоялась, и	президента	можно считать избранным. [Показать структуру]		scitat	PREF	AFFIRM	imperfective	no	nfin	dep_infinitive	ov	1	np	def	anim	sg	acc
753	соответственно, кампания сама по себе	имеет	такое легитимирующее, антуражное значение, сугубо [Показать структуру]		imet	NONPREF	AFFIRM	imperfective	no	present	yes	vo	0	np	indef	inanim	sg	nomacc
754	с Михаилом Касьяновым, которому не	дали	возможности участвовать в выборах. [Показать структуру]		davat	NONPREF	NEGAT	perfective	no	past	yes	vo	0	np	indef	inanim	sg	gen
755	Как вы	оцениваете	эту ситуацию? [Показать структуру]		ocenivat	PREF	AFFIRM	imperfective	yes	present	yes	vo	0	np	def	inanim	sg	acc
756	не стоило так уж откровенно	отсекать	оппозиционного кандидата? [Показать структуру]		otsekat	PREF	AFFIRM	imperfective	no	nfin	dep_infinitive	vo	0	np	def	anim	sg	acc
757	Касьянов, даже если бы ему	дали	возможность свободно выходить в эфир [Показать структуру]		davat	NONPREF	AFFIRM	perfective	no	subjunctive	yes	vo	0	np	generic	inanim	sg	nomacc
758	инерция последних лет, пиар- инерция -	блокировать	любые оппозиционные возможности, обеспечить гарантии [Показать структуру]		blokirovat	NONPREF	AFFIRM	imperfective	no	nfin	infinitive	vo	0	np	indef	inanim	pl	nomacc
759	Вполне можно было бы	это	сделать, и это бы его [Показать структуру]	main	delat	PREF	AFFIRM	perfective	no	nfin	dep_infinitive	ov	0	dem_pro	def	inanim	sg	nomacc
760		Развитие	малого и среднего бизнеса тормозит нехватка нежилого фонда [Показать структуру]		tormozit	NONPREF	AFFIRM	imperfective	no	present	yes	ov	0	np	generic	inanim	sg	nomacc
761		Продавать	помещения Москва не хочет. [Показать структуру]	main	prodavat	PREF	AFFIRM	imperfective	no	nfin	dep_infinitive	vo	0	np	indef	inanim	pl	nomacc
762	А льготную	аренду	не удается получить по федеральному законодательству [Показать структуру]	main	polucat	PREF	AFFIRM	perfective	no	nfin	dep_infinitive	ov	1	np	generic	inanim	sg	acc
763	Мэрия предлагает предпринимателям	строить	помещения "в доле". [Показать структуру]	main	stroit	NONPREF	AFFIRM	imperfective	no	nfin	dep_infinitive	vo	0	np	generic	inanim	pl	nomacc
764	Малый и средний бизнес,	ставку	на который делает экономика большинства [Показать структуру]		delat	NONPREF	AFFIRM	imperfective	no	present	yes	ov	2	np	generic	inanim	sg	acc
765	предприниматели далеко не всегда спешат	открывать	новую организацию. [Показать структуру]		otkryvat	PREF	AFFIRM	imperfective	no	nfin	dep_infinitive	vo	0	np	indef	inanim	sg	acc
766	Город попытался	решить	эту проблему и создал целевую [Показать структуру]	main	resat	NONPREF	AFFIRM	perfective	no	nfin	dep_infinitive	vo	0	np	def	inanim	sg	acc
767	При этом	продавать	площади предпринимателям чиновники не намерены [Показать структуру]	main	prodavat	PREF	AFFIRM	imperfective	no	nfin	dep_infinitive	vo	0	np	indef	inanim	pl	nomacc
768	В первую очередь представители власти	объясняют	такое решение тем, что это [Показать структуру]		objasnjat	PREF	AFFIRM	imperfective	no	present	yes	vo	0	np	def	inanim	sg	nomacc
769	Игрушка позволяет	исполнять	невероятно динамичные трюки, в которых [Показать структуру]	main	ispolnjat	PREF	AFFIRM	imperfective	no	nfin	dep_infinitive	vo	1	np	indef	inanim	pl	nomacc
770	Первый астроджекс	представлял	собой три гайки на зубной [Показать структуру]		predstavljat	PREF	AFFIRM	imperfective	no	past	yes	vo	1	np	indef	inanim	pl	nomacc
771		Поведение	внешне простой игрушки оказалось непросто описать математически [Показать структуру]	main	opisyvat	PREF	AFFIRM	perfective	no	nfin	dep_infinitive	ov	5	np	def	inanim	sg	nomacc
772	Перед тем как	запатентовать	свое изобретение, Ларри Шоу потратил [Показать структуру]		zapatentovyvat	PREF	AFFIRM	perfective	no	nfin	infinitive	vo	0	np	def	inanim	sg	nomacc
773	Шоу пришлось	основать	собственную компанию и попытаться изготавливать [Показать структуру]	main	osnovyvat	PREF	AFFIRM	perfective	no	nfin	dep_infinitive	vo	0	np	indef	inanim	sg	acc
774	Астроджекс пока еще только	набирает	популярность, но в Книге рекордов [Показать структуру]		nabirat	PREF	AFFIRM	imperfective	yes	present	yes	vo	0	np	generic	inanim	sg	nomacc
775	Однако не стоит	путать	диаболо с "демоном Максвелла", ибо [Показать структуру]	main	putat	NONPREF	AFFIRM	imperfective	no	nfin	dep_infinitive	vo	0	np	generic	inanim	sg	nomacc
776	Название игрушки не	роднит	ее с Люцифером, а происходит [Показать структуру]		rodnit	NONPREF	NEGAT	imperfective	no	present	yes	vo	0	pers_pro	def	inanim	sg	acc
777	Как заманчиво	осознавать	себя игроком! [Показать структуру]		osoznavat	PREF	AFFIRM	imperfective	no	nfin	dep_infinitive	vo	0	refl_pro	def	anim	sg	acc
778	неудачным сравнениям - сам Шендерович вряд ли	считает	политику игрой. [Показать структуру]		scitat	PREF	AFFIRM	imperfective	no	present	yes	vo	0	np	generic	inanim	sg	acc
779	с тем, что левые неизбежно	нарушат	свои обязательства, если в Кремле [Показать структуру]		narusat	PREF	AFFIRM	perfective	no	future	yes	vo	0	np	def	inanim	pl	nomacc
780	Кто	поставил	такой выбор: либо с Кремлем [Показать структуру]		stavit	PREF	AFFIRM	perfective	no	past	yes	vo	0	np	def	inanim	sg	nomacc
781	Надо	использовать	"имеющиеся в наличии ресурсы для [Показать структуру]	main	ispolzovat	PREF	AFFIRM	imperfective	no	nfin	dep_infinitive	vo	0	np	indef	inanim	pl	nomacc
782	взаимодействия с левыми и националистами	это	сделать невозможно", - уверяет Денис Билунов [Показать структуру]	main	delat	PREF	AFFIRM	perfective	no	nfin	dep_infinitive	ov	0	dem_pro	def	inanim	sg	nomacc
783	коалиция нужна для того, чтобы	завоевать	доверие всего общества. [Показать структуру]		zavojevyvat	PREF	AFFIRM	perfective	no	nfin	infinitive	vo	0	np	def	inanim	sg	nomacc
784	Неплохо было бы, чтобы демократы	завоевали	хотя бы доверие демократической его части [Показать структуру]		zavojevyvat	PREF	AFFIRM	perfective	no	subjunctive	yes	vo	2	np	def	inanim	sg	nomacc
785	Этот оппозиционный тяни-толкай	отвратит	от себя и правых и [Показать структуру]		otvrascat	PREF	AFFIRM	perfective	no	future	yes	vo	3	np	indef	anim	pl	acc
786	Девелоперы	разогревают	рынок заявлениями, что жилье в [Показать структуру]		razogrevat	PREF	AFFIRM	imperfective	yes	present	yes	vo	0	np	def	inanim	sg	nomacc
787	Но огни Москвы больше не	греют	провинциалов. [Показать структуру]		gret	NONPREF	NEGAT	imperfective	no	present	yes	vo	0	np	indef	anim	pl	acc
788	российских городов, то сейчас мегаполис	потерял	привлекательность для 94 % провинциалов [Показать структуру]		terjat	PREF	AFFIRM	perfective	no	past	yes	vo	0	np	generic	inanim	sg	nomacc
789	Вчера ЦСИ	обнародовал	итоги исследования, посвященного привлекательности Москвы [Показать структуру]		obnarodovat	PREF	AFFIRM	perfective	no	past	yes	vo	0	np	def	inanim	pl	nomacc
790	Выяснилось, что 94 % жителей крупнейших российских городов ни под каким предлогом не собираются	покидать	родные пенаты и перебираться в [Показать структуру]	subordinate	pokidat	PREF	AFFIRM	imperfective	no	nfin	dep_infinitive	vo	0	np	def	inanim	pl	nomacc
791	Только 1 %	планирует	переезд в ближайшей перспективе. [Показать структуру]		planirovat	NONPREF	AFFIRM	imperfective	no	present	yes	vo	0	np	generic	inanim	sg	nomacc
792	верят в свои силы и	рассматривают	столицу как возможность для быстрого [Показать структуру]		rassmatrivat	PREF	AFFIRM	imperfective	yes	present	yes	vo	0	np	def	inanim	sg	acc
793	родине, где они вполне могут	устроить	себе комфортную жизнь. [Показать структуру]	subordinate	ustraivat	PREF	AFFIRM	perfective	no	nfin	dep_infinitive	vo	1	np	indef	inanim	sg	acc
794	уверены, что в Москве легче	получить	хорошее образование, найти подходящую работу [Показать структуру]	subordinate	polucat	PREF	AFFIRM	perfective	no	nfin	dep_infinitive	vo	0	np	generic	inanim	sg	nomacc
795	переезда, даже если бы им	предоставили	работу и доступное жилье. [Показать структуру]		predostavljat	PREF	AFFIRM	perfective	no	subjunctive	yes	vo	0	np	indef	inanim	sg	acc
796	полудню индексы РТС и ММВБ	пробили	психологические для каждой из этих бирж рубежи [Показать структуру]		probivat	PREF	AFFIRM	perfective	no	past	yes	vo	0	np	indef	inanim	pl	nomacc
797	но большинство не советуют россиянам	вкладывать	сейчас деньги в акции. [Показать структуру]		vkladyvat	PREF	AFFIRM	imperfective	no	nfin	dep_infinitive	vo	1	np	indef	inanim	pl	nomacc
798	Причиной такого падения большинство аналитиков	называют	ухудшение конъюнктуры мировых фондовых и [Показать структуру]		nazyvat	PREF	AFFIRM	imperfective	yes	present	yes	vo	0	np	def	inanim	sg	nomacc
799	Инвесторы видят, что коллапс Lehman	запустил	цепную реакцию в банковском секторе [Показать структуру]		zapuskat	PREF	AFFIRM	perfective	no	past	yes	vo	0	np	indef	inanim	sg	acc
800	Как только начался кризис, инвесторы поспешили	начать	продажу всех своих активов, чтобы [Показать структуру]	main	nacinat	PREF	AFFIRM	perfective	no	nfin	dep_infinitive	vo	0	np	def	inanim	sg	acc
801	раз биржи РТС и ММВБ	приостанавливали	на час торги акциями компаний [Показать структуру]		priostanavlivat	PREF	AFFIRM	imperfective	yes	past	yes	vo	2	np	def	inanim	pl	nomacc
802	небольшим до закрытия ММВБ вообще	приостановила	торги бумагами всех эмитентов из-за [Показать структуру]		priostanavlivat	PREF	AFFIRM	perfective	no	past	yes	vo	0	np	def	inanim	pl	nomacc
803		Возобновив	торги через час на три [Показать структуру]	subordinate	vozobnovljat	PREF	AFFIRM	perfective	no	nfin	converb	vo	0	np	def	inanim	pl	nomacc
804	Коллегия Минобрнауки вчера	рассмотрела	проект программы "Образование и развитие [Показать структуру]		rassmatrivat	PREF	AFFIRM	perfective	no	past	yes	vo	0	np	indef	inanim	sg	nomacc
805	образования и науки Андрей Фурсенко,	открывая	заседание, сразу нацелил чиновников на [Показать структуру]	subordinate	otkryvat	PREF	AFFIRM	imperfective	no	nfin	converb	vo	0	np	def	inanim	sg	nomacc
806	Значительная часть образовательных учреждений	получит	статус автономных, а с этим [Показать структуру]		polucat	PREF	AFFIRM	perfective	no	future	yes	vo	0	np	generic	inanim	sg	nomacc
807	Для организаций и семей, которые	тратят	деньги на обучение детей, предусмотрены [Показать структуру]		tratit	NONPREF	AFFIRM	imperfective	no	present	yes	vo	0	np	generic	inanim	pl	nomacc
808	Каждый россиянин	получит	возможность повысить свой профессиональный уровень [Показать структуру]		polucat	PREF	AFFIRM	perfective	no	future	yes	vo	0	np	generic	inanim	sg	nomacc
809	Учителя смогут	проходить	профподготовку и переподготовку в специализированных [Показать структуру]	main	prohodit	PREF	AFFIRM	imperfective	no	nfin	dep_infinitive	vo	0	np	generic	inanim	pl	acc
810		Которое	, вопреки слухам, отменять никто не [Показать структуру]	subordinate	otmenjat	PREF	AFFIRM	imperfective	no	nfin	dep_infinitive	ov	2	relative_pro	def	inanim	sg	acc
811	Если удастся	выполнить	все задуманное, заработок 27 процентов [Показать структуру]	main	vypolnjat	PREF	AFFIRM	perfective	no	nfin	dep_infinitive	vo	0	def_pro	def	inanim	sg	nomacc
812	При этом	детей	- инвалидов, которых раньше старались всячески изолировать в спецшколах, теперь станут охотнее принимать в обычные. [Показать структуру]	main	prinimat	PREF	AFFIRM	imperfective	no	nfin	dep_infinitive	ov	9	np	indef	anim	pl	acc
813		Систему	высшего образования представят университеты, академии [Показать структуру]		predstavljat	PREF	AFFIRM	perfective	no	future	yes	ov	2	np	def	inanim	sg	acc
814	упали котировки акций, что, впрочем,	вызвало	всеобщую панику на фондовом рынке [Показать структуру]		vyzyvat	PREF	AFFIRM	perfective	no	past	yes	vo	0	np	generic	inanim	sg	acc
815	самые большие состояния, и рынок	меняет	свои очертания, поскольку идет волна [Показать структуру]		menjat	NONPREF	AFFIRM	imperfective	no	present	yes	vo	0	np	def	inanim	pl	nomacc
816	Те, у кого остались деньги,	съедают	тех, у кого их нет [Показать структуру]	main	jest	PREF	AFFIRM	imperfective	yes	present	yes	vo	0	dem_pro	def	anim	pl	acc
817	кризисе можно, и не обязательно	имея	огромный начальный капитал, хотя наличие [Показать структуру]	subordinate	imet	NONPREF	AFFIRM	imperfective	no	nfin	converb	vo	0	np	indef	inanim	sg	nomacc
818	богатых историей кризисов, есть человек,	которого	иначе как королем банкротств не называют. [Показать структуру]	subordinate	nazyvat	PREF	NEGAT	imperfective	yes	present	yes	ov	4	relative_pro	def	anim	sg	acc
819	Росс	скупал	текстильные фабрики, разорившиеся по вине [Показать структуру]		skupat	PREF	AFFIRM	imperfective	no	past	yes	vo	0	np	indef	inanim	pl	nomacc
820	намного моложе американского, поэтому все	кризисы	можно сосчитать по пальцам. [Показать структуру]		scitat	PREF	AFFIRM	perfective	no	nfin	dep_infinitive	ov	1	np	def	inanim	pl	nomacc
821	кризисе хорошо заработал Абрамович, он	вывел	деньги, которые были в Международном [Показать структуру]		vyvodit	PREF	AFFIRM	perfective	no	past	yes	vo	0	np	def	inanim	pl	nomacc
822		Пятерых	спасти не удалось. [Показать структуру]		spasat	PREF	AFFIRM	perfective	no	nfin	dep_infinitive	ov	0	quant	indef	anim	pl	acc
823	потрясена шквалом сведений, которые никакого	отношения	не имели к действительности. [Показать структуру]		imet	NONPREF	NEGAT	imperfective	no	past	yes	ov	0	np	indef	inanim	sg	gen
824	Замглавы Галимжан Куджанов	направил	в школу архитектора района Фавариса [Показать структуру]		napravljat	PREF	AFFIRM	perfective	no	past	yes	vo	2	np	def	anim	sg	acc
825	Однако дополнительную	деформацию	визуально обнаружить не удалось. [Показать структуру]	main	obnaruzyvat	PREF	AFFIRM	perfective	no	nfin	dep_infinitive	ov	1	np	indef	inanim	sg	acc
826	Было решено	усилить	несущие конструкции. [Показать структуру]	main	usilivat	PREF	AFFIRM	perfective	no	nfin	dep_infinitive	vo	0	np	def	inanim	pl	nomacc
827	создалась аварийная ситуация и надо	выводить	детей со 2-го и 3-го [Показать структуру]		vyvodit	PREF	AFFIRM	imperfective	no	nfin	dep_infinitive	vo	0	np	indef	anim	pl	acc
828		Обсуждают	каркасную систему укрепления. [Показать структуру]		obsuzdat	PREF	AFFIRM	imperfective	yes	present	yes	vo	0	np	generic	inanim	sg	acc
829	Архитектор и замглавы	покидают	школу. [Показать структуру]		pokidat	PREF	AFFIRM	imperfective	no	present	yes	vo	0	np	def	inanim	sg	acc
830	Не	проходят	пяти метров, происходит обрушение стены [Показать структуру]		prohodit	PREF	NEGAT	imperfective	no	present	yes	vo	0	np	generic	inanim	pl	gen
831	Простенки	увлекают	плиты перекрытий второго и третьего этажей [Показать структуру]		uvlekat	PREF	AFFIRM	imperfective	no	present	yes	vo	0	np	def	inanim	pl	nomacc
832	Книжка Суркова (тираж 2000 экземпляров)	включает	тексты его выступлений и интервью [Показать структуру]		vkljucat	PREF	AFFIRM	imperfective	no	present	yes	vo	0	np	indef	inanim	pl	nomacc
833	менатеповской структуре и еще не	обозначил	себя для большинства в качестве действующего [Показать структуру]		oboznacat	PREF	NEGAT	perfective	no	past	yes	vo	0	refl_pro	def	anim	sg	acc
834		Гостей	встречал главред "Европы" и глава [Показать структуру]		vstrecat	PREF	AFFIRM	imperfective	no	past	yes	ov	0	np	def	anim	pl	acc
835	Если бы у нас так	напечатали	портрет Путина или Медведева, шум [Показать структуру]		pecatat	PREF	AFFIRM	perfective	no	subjunctive	yes	vo	0	np	indef	inanim	sg	nomacc
836	Начали, не	дожидаясь	"действующего сильного политика", застрявшего в [Показать структуру]	subordinate	dozidatsja	PREF	NEGAT	imperfective	no	nfin	converb	vo	0	np	indef	anim	sg	gen
837	неформальная (Глеб Павловский однажды, не	прерывая	своего выступления, даже ответил на [Показать структуру]	subordinate	preryvat	PREF	NEGAT	imperfective	yes	nfin	converb	vo	0	np	def	inanim	sg	gen
838	Павловский	обозначил	тему беседы так: "Дефицит содержательных [Показать структуру]		oboznacat	PREF	AFFIRM	perfective	no	past	yes	vo	0	np	def	inanim	sg	acc
839	Вячеслав Глазычев напомнил - собрались, чтобы	обсудить	программу развития страны до 2020 [Показать структуру]		obsuzdat	PREF	AFFIRM	perfective	no	nfin	infinitive	vo	0	np	def	inanim	sg	acc
840	Глазычев	призвал	интеллектуалов "не откликаться на формальные [Показать структуру]		prizyvat	PREF	AFFIRM	perfective	no	past	yes	vo	0	np	indef	anim	sg	acc
841	в шаге от того, чтобы	превратить	Всемирную торговую организацию в площадку [Показать структуру]		prevrascat	PREF	AFFIRM	perfective	no	nfin	infinitive	vo	0	np	def	inanim	sg	acc
842	Это может	взорвать	ВТО, а вместе с ней [Показать структуру]	main	vzryvat	PREF	AFFIRM	perfective	no	nfin	dep_infinitive	vo	0	np	def	inanim	sg	nomacc
843	Нынешний свод правил ВТО - попытка	свести	воедино экономические интересы сразу 153 государств [Показать структуру]		svodit	PREF	AFFIRM	perfective	no	nfin	infinitive	vo	1	np	def	inanim	pl	nomacc
844	Каждое решение,	затрагивающее	правила ВТО, должно быть одобрено [Показать структуру]	subordinate	zatragivat	PREF	AFFIRM	imperfective	no	present	participle	vo	0	np	def	inanim	pl	nomacc
845	Кавказский кризис	поставил	под угрозу сразу оба принципа [Показать структуру]		stavit	PREF	AFFIRM	perfective	no	past	yes	vo	3	np	def	inanim	pl	nomacc
846	Первый	удар	по мировой торговле, вполне возможно, неосознанный, нанесли официальные лица США [Показать структуру]		nanosit	PREF	AFFIRM	perfective	no	past	yes	ov	0	np	def	inanim	sg	nomacc
847	из Госдепартамента начали доноситься призывы "	наказать	Россию", заблокировав ее вступление в [Показать структуру]		nakazyvat	PREF	AFFIRM	perfective	no	nfin	infinitive	vo	0	np	def	inanim	sg	acc
848	незамедлительно отреагировала - премьер Владимир Путин	дал	своему заместителю Игорю Шувалову поручение проанализировать обязательства [Показать структуру]		davat	NONPREF	AFFIRM	perfective	no	past	yes	vo	4	np	def	inanim	sg	nomacc
849	импорт мяса и птицы - премьер	раскритиковал	их в эфире федеральных телеканалов [Показать структуру]		kritikovat	PREF	AFFIRM	perfective	no	past	yes	vo	0	pers_pro	def	anim	pl	acc
850		Простим	главреду известное вольнодумство: он не [Показать структуру]		proscat	NONPREF	AFFIRM	perfective	no	imperative	yes	vo	1	np	def	inanim	sg	nomacc
851	в самом Кремле стараются не	употреблять	этот эзопов язык. [Показать структуру]		upotrebljat	PREF	NEGAT	imperfective	no	nfin	dep_infinitive	vo	0	np	def	inanim	sg	nomacc
852	ведущего г-на Лукьянова, можно ли	считать	новую "холодную войну" начавшейся? [Показать структуру]	subordinate	scitat	PREF	AFFIRM	imperfective	no	nfin	dep_infinitive	vo	0	np	def	inanim	sg	acc
853	г-н Рябков не менее твердо	сформулировал	несколько тезисов, которыми, очевидно, оперирует [Показать структуру]		formulirovat	PREF	AFFIRM	perfective	no	past	yes	vo	0	quant	indef	inanim	pl	nomacc
854	западные СМИ не смогли объективно	оценить	происшедшее; [Показать структуру]		ocenivat	PREF	AFFIRM	perfective	no	nfin	dep_infinitive	vo	0	np	def	inanim	sg	nomacc
855	в антизападном русле, и если	это	еще нельзя назвать общенациональным консенсусом [Показать структуру]	subordinate	nazyvat	PREF	AFFIRM	perfective	no	nfin	dep_infinitive	ov	2	dem_pro	def	inanim	sg	nomacc
856	Справедливость последнего тезиса	нашла	свое подтверждение уже в ходе дальнейшей [Показать структуру]		nahodit	PREF	AFFIRM	perfective	no	past	yes	vo	0	np	def	inanim	sg	nomacc
857	относиться серьезно, и позволила себе	бросить	вызов США. [Показать структуру]		brosat	NONPREF	AFFIRM	perfective	no	nfin	dep_infinitive	vo	0	np	generic	inanim	sg	nomacc
858	при этом она не смогла	убедить	Запад в благородности своих целей [Показать структуру]		ubezdat	PREF	AFFIRM	perfective	no	nfin	dep_infinitive	vo	0	np	def	inanim	sg	nomacc
859	Несколько дней назад мы	поздравляли	выпускника Международного института экономики и финансов (МИЭФ) ГУ-ВШЭ Владимира Мухарлямова [Показать структуру]		pozdravljat	PREF	AFFIRM	imperfective	no	past	yes	vo	0	np	def	anim	sg	acc
860	Теперь мы	публикуем	интервью с самим Володей. [Показать структуру]		publikovat	NONPREF	AFFIRM	imperfective	no	present	yes	vo	0	np	def	inanim	sg	nomacc
861	-	Что	вы почувствовали, когда узнали, что [Показать структуру]	main	cuvstvovat	PREF	AFFIRM	perfective	no	past	yes	ov	1	inter_pro	indef	inanim	sg	nomacc
862	речь о финансировании, я спросил: "	Что	нужно сделать, чтобы попасть в [Показать структуру]	main	delat	PREF	AFFIRM	perfective	no	nfin	dep_infinitive	ov	1	inter_pro	indef	inanim	sg	nomacc
863	дружно посмеялись, поняв, что нужно	искать	другие способы. [Показать структуру]	subordinate	iskat	NONPREF	AFFIRM	imperfective	no	nfin	dep_infinitive	vo	0	np	indef	inanim	pl	nomacc
864	что я обрадовался, - это значит,	ничего	не сказать. [Показать структуру]		govorit	PREF	NEGAT	perfective	no	nfin	infinitive	ov	1	neg_pro	indef	inanim	sg	gen
865	То чувство, которое возникает, когда	делаешь	что-то очень долго и упорно [Показать структуру]	subordinate	delat	NONPREF	AFFIRM	imperfective	no	present	yes	vo	0	indef_pro	indef	inanim	sg	nomacc
866	- А	что	думают по этому поводу ваши [Показать структуру]	main	dumat	NONPREF	AFFIRM	imperfective	no	present	yes	ov	0	inter_pro	indef	inanim	sg	nomacc
867	Хотя им, конечно, нелегко было	отправлять	второго сына учиться за границу [Показать структуру]	main	otpravljat	PREF	AFFIRM	imperfective	no	nfin	dep_infinitive	vo	0	np	def	anim	sg	acc
868	из серии "Транзит", но, признаюсь,	тешу	себя надеждой, что кто-нибудь по [Показать структуру]		tesit	NONPREF	AFFIRM	imperfective	no	present	yes	vo	0	refl_pro	def	anim	sg	acc
869	прежде, чем двинуться дальше, не	упущу	возможности похвастаться. [Показать структуру]		upuskat	PREF	NEGAT	perfective	no	future	yes	vo	0	np	def	inanim	sg	gen
870	одиночке) событиями, которые в совокупности	подкрепляли	эмпирически мои предшествующие умозрительные построения [Показать структуру]		podkrepljat	PREF	AFFIRM	imperfective	yes	past	yes	vo	1	np	def	inanim	pl	nomacc
871	избран, и что избиратели не	имеют	к этому "избранию" никакого отношения [Показать структуру]		imet	NONPREF	NEGAT	imperfective	no	present	yes	vo	3	np	generic	inanim	sg	gen
872	настоящие избиратели никогда бы не	допустили	унижения их избранника. [Показать структуру]		dopuskat	PREF	NEGAT	perfective	no	subjunctive	yes	vo	0	np	generic	inanim	sg	gen
873	С одной стороны,	унижая	Медведева, Путин и его присные [Показать структуру]	subordinate	unizat	PREF	AFFIRM	imperfective	no	nfin	converb	vo	0	name	def	anim	sg	acc
874	избиратели, голосовавшие за Медведева, спокойно	переносят	унижение своего избранника, что можно [Показать структуру]		perenosit	PREF	AFFIRM	imperfective	no	present	yes	vo	0	np	generic	inanim	sg	nomacc
875	патрон - Путин, а клиентела, кокетливо	называющая	себя партией, - "Единая Россия". [Показать структуру]	subordinate	nazyvat	PREF	AFFIRM	imperfective	yes	present	participle	vo	0	refl_pro	def	anim	sg	acc
876	неформальных закулисных договоренностей, что, в частности,	побудило	ее сделать свою связь с [Показать структуру]		pobuzdat	PREF	AFFIRM	perfective	no	past	yes	vo	0	pers_pro	def	anim	sg	acc
877	Федеральная служба по финансовым рынкам	закрыла	торги, - правильно. [Показать структуру]		zakryvat	PREF	AFFIRM	perfective	no	past	yes	vo	0	np	indef	inanim	pl	nomacc
878	нет свободных денег, чтобы начать	покупать	акции. [Показать структуру]	subordinate	pokupat	PREF	AFFIRM	imperfective	no	nfin	dep_infinitive	vo	0	np	indef	inanim	pl	nomacc
879	три кита банковского рынка будут	кредитовать	средние и мелкие банки, обеспечивая [Показать структуру]		kreditovat	NONPREF	AFFIRM	imperfective	no	nfin	dep_infinitive	vo	0	np	indef	inanim	pl	nomacc
880	Мировые державы	смягчают	удар [Показать структуру]		smjagcat	PREF	AFFIRM	imperfective	no	present	yes	vo	0	np	def	inanim	sg	nomacc
881	власти ведущих мировых держав тоже	предприняли	меры для смягчения мирового финансового [Показать структуру]		predprinimat	PREF	AFFIRM	perfective	no	past	yes	vo	0	np	indef	inanim	pl	nomacc
882	- Нужно	вселить	уверенность в финансовых игроков, что [Показать структуру]	main	vseliat	PREF	AFFIRM	perfective	no	nfin	dep_infinitive	vo	0	np	generic	inanim	sg	nomacc
883	формально высшей - власти, в то время как премьер	сосредотачивает	в своих руках руководство экономической, финансовой и социальной политикой. [Показать структуру]		sosredotacivat	PREF	AFFIRM	imperfective	yes	present	yes	vo	3	np	generic	inanim	sg	nomacc
884	Собеседники	отмечали	хорошую подготовку российского лидера, его [Показать структуру]		otmecat	PREF	AFFIRM	imperfective	yes	past	yes	vo	0	np	def	inanim	sg	acc
885	Они также	отмечали	сообразительность Медведева, его спокойный стиль [Показать структуру]		otmecat	PREF	AFFIRM	imperfective	yes	past	yes	vo	0	np	def	inanim	sg	nomacc
886	действует в целом корректно, не	заслоняя	нового президента на международной арене [Показать структуру]	subordinate	zaslonjat	PREF	NEGAT	imperfective	no	nfin	converb	vo	0	np	def	anim	sg	acc
887	аппаратчиком, будет постепенно, но неуклонно	сосредотачивать	властные полномочия в своих руках [Показать структуру]		sosredotacivat	PREF	AFFIRM	imperfective	yes	nfin	dep_infinitive	vo	0	np	indef	inanim	pl	nomacc
888	дипломатии признан одновременно успешным и	исчерпавшим	себя. [Показать структуру]	subordinate	iscerpyvat	PREF	AFFIRM	perfective	no	past	participle	vo	0	refl_pro	def	anim	sg	acc
889	Россия кричала, чтобы	ее	услышали, и докричалась. [Показать структуру]		slysat	PREF	AFFIRM	perfective	no	subjunctive	yes	ov	0	pers_pro	def	anim	sg	acc
890	Мы	вас	слушаем", - зазвучало наконец из западных [Показать структуру]		slusat	NONPREF	AFFIRM	imperfective	no	present	yes	ov	0	pers_pro	def	anim	pl	acc
891	Москвой встала новая проблема: не	комментировать	других репликами "в сторону", а [Показать структуру]	main	kommentirovat	NONPREF	NEGAT	imperfective	no	nfin	infinitive	vo	0	def_pro	def	anim	pl	acc
892	Но	что	именно говорить? [Показать структуру]	main	govorit	NONPREF	AFFIRM	imperfective	no	nfin	infinitive	ov	1	inter_pro	indef	inanim	sg	nomacc
893	Когда	заводят	разговор о состоянии нашего гражданского [Показать структуру]		zavodit	PREF	AFFIRM	imperfective	no	present	yes	vo	0	np	def	inanim	sg	nomacc
894	точка зрения - скорее официальная, особую	популярность	она получила после создания Общественной [Показать структуру]		polucat	PREF	AFFIRM	perfective	no	past	yes	ov	1	np	generic	inanim	sg	acc
895	моей точки зрения, обе позиции	имеют	вполне объективные основания. [Показать структуру]		imet	NONPREF	AFFIRM	imperfective	no	present	yes	vo	1	np	indef	inanim	pl	nomacc
896	Действительно, 70 лет коммунистического тоталитаризма	атомизировали	наше общество, направив естественное для [Показать структуру]		atomizirovat	NONPREF	AFFIRM	perfective	no	past	yes	vo	0	np	def	inanim	sg	nomacc
897	Появилось множество неформалов, которые	развили	бурную активность, вплоть до многотысячных уличных [Показать структуру]		razvivat	PREF	AFFIRM	perfective	no	past	yes	vo	0	np	indef	inanim	sg	acc
898		Перечислим	некоторые его составляющие: [Показать структуру]		perecisljat	PREF	AFFIRM	perfective	no	imperative	yes	vo	0	np	indef	inanim	pl	nomacc
899	GONGO (правительственных неправительственных организаций), которые	имитируют	общественную активность и подыгрывают власти [Показать структуру]		imitirovat	NONPREF	AFFIRM	imperfective	no	present	yes	vo	0	np	generic	inanim	sg	acc
900		Это	ярко показал, в частности, Гражданский форум [Показать структуру]	main	pokazyvat	PREF	AFFIRM	perfective	no	past	yes	ov	1	dem_pro	def	inanim	sg	nomacc
901	Если	брать	государство, то оно принимало к [Показать структуру]		brat	NONPREF	AFFIRM	imperfective	no	nfin	infinitive	vo	0	np	def	inanim	sg	nomacc
902	Надо	создавать	новую систему, которая закрепила бы [Показать структуру]	main	sozdavat	PREF	AFFIRM	imperfective	no	nfin	dep_infinitive	vo	0	np	indef	inanim	sg	acc
903		Представьте	себе невероятное. [Показать структуру]		predstavljat	PREF	AFFIRM	perfective	no	imperative	yes	vo	1	np	indef	inanim	sg	nomacc
904	Больше того, он	усложняет	условия: пусть всех набирают по [Показать структуру]		usloznjat	PREF	AFFIRM	imperfective	no	present	yes	vo	0	np	def	inanim	pl	nomacc
905	культура и традиции (по Жванецкому: "	Что	хочется сделать, когда заберешься наверх [Показать структуру]	main	delat	PREF	AFFIRM	perfective	no	nfin	dep_infinitive	ov	1	inter_pro	indef	inanim	sg	nomacc
906	Но ведь соблазны	подстерегают	чиновников и политиков во всем [Показать структуру]		podsteregat	PREF	AFFIRM	imperfective	yes	present	yes	vo	0	np	indef	anim	pl	acc
907	Но нигде мы не	найдем	такой "ценности", благодаря которой должна [Показать структуру]		nahodit	PREF	NEGAT	perfective	no	future	yes	vo	0	np	indef	inanim	sg	gen
908	Но именно	ее	нам навязывают, порой очень хитро [Показать структуру]		navjazyvat	PREF	AFFIRM	imperfective	yes	present	yes	ov	1	pers_pro	def	anim	sg	acc
909	быть не может, иначе мы	разорвем	друг друга. [Показать структуру]		razryvat	PREF	AFFIRM	perfective	no	future	yes	vo	0	recipr_pro	def	anim	sg	acc
910	как, например, школьное самоуправление: детям	дают	возможность, скажем, следить за порядком [Показать структуру]		davat	NONPREF	AFFIRM	imperfective	no	present	yes	vo	0	np	indef	inanim	sg	nomacc
911	есть один критерий, который позволяет	отличить	демократию от "демократии с прилагательным [Показать структуру]	subordinate	otlicat	PREF	AFFIRM	perfective	no	nfin	dep_infinitive	vo	0	np	generic	inanim	sg	acc
912	мыслитель XX века Карл Поппер	сформулировал	этот критерий: демократия - такая форма [Показать структуру]		formulirovat	PREF	AFFIRM	perfective	no	past	yes	vo	0	np	def	inanim	sg	nomacc
913	Правительство в ближайшее время	рассмотрит	вопрос об отмене квот на [Показать структуру]		rassmatrivat	PREF	AFFIRM	perfective	no	future	yes	vo	0	np	def	inanim	sg	nomacc
914	2008 году, по информации Минздравсоцразвития,	составила	1 млн. 828 тыс. человек [Показать структуру]		sostavljat	PREF	AFFIRM	perfective	no	past	yes	vo	0	quant	indef	inanim	pl	nomacc
915	в 5 млн. рабочих мест,	которые	занимают иностранцы, - сообщил "НИ" директор [Показать структуру]	subordinate	zanimat	PREF	AFFIRM	imperfective	no	present	yes	ov	0	relative_pro	def	inanim	pl	nomacc
916	"Мы еще не успели	совершить	серьезный переход к бизнес- образованию [Показать структуру]	main	soversat	PREF	AFFIRM	perfective	no	nfin	dep_infinitive	vo	0	np	generic	inanim	sg	nomacc
917	Пока этого нет, проще	приглашать	специалистов из-за рубежа, лучше всего [Показать структуру]	main	priglasat	PREF	AFFIRM	imperfective	no	nfin	dep_infinitive	vo	0	np	indef	anim	pl	acc
918	Некоторые из них	прошли	такой опыт в Польше, Венгрии [Показать структуру]		prohodit	PREF	AFFIRM	perfective	no	past	yes	vo	0	np	def	inanim	sg	nomacc
919	году численность граждан трудоспособного возраста	составит	87,6 млн. человек, что на [Показать структуру]		sostavljat	PREF	AFFIRM	perfective	no	future	yes	vo	0	quant	indef	inanim	pl	nomacc
920	Они могут не только	сократить	трудовой поток в нашу страну [Показать структуру]	main	sokrascat	PREF	AFFIRM	perfective	no	nfin	dep_infinitive	vo	0	np	def	inanim	sg	nomacc
921	года 44 % населения страны	оценивали	отношения с США в диапазоне [Показать структуру]		ocenivat	PREF	AFFIRM	imperfective	yes	past	yes	vo	0	np	def	inanim	pl	nomacc
922	Глава Рособрнадзора Виктор Болотов	сделал	ряд громких заявлений о будущем [Показать структуру]		delat	PREF	AFFIRM	perfective	no	past	yes	vo	0	np	indef	inanim	sg	nomacc
923	На трудном посту	его	сменила Любовь Глебова, статс-секретарь - заместитель [Показать структуру]		menjat	PREF	AFFIRM	perfective	no	past	yes	ov	0	pers_pro	def	anim	sg	acc
924		Что	поделать, такова она - близость к [Показать структуру]	main	podelat	PREF	AFFIRM	perfective	no	nfin	infinitive	ov	0	inter_pro	indef	inanim	sg	nomacc
925	очень сильное желание у власти	привлечь	к этому делу человека со стороны [Показать структуру]		privkat	PREF	AFFIRM	perfective	no	nfin	infinitive	vo	3	np	indef	anim	sg	acc
926	единого госэкзамена по русскому языку	задания	по нему неожиданно выложил в [Показать структуру]		vykladyvat	PREF	AFFIRM	perfective	no	past	yes	ov	3	np	indef	inanim	pl	nomacc
927	Третий	скандал	, связанный с отсутствием сертификатов по ЕГЭ в ряде регионов к началу приемной кампании в вузах, успели вовремя погасить [Показать структуру]		pogasat	PREF	AFFIRM	perfective	no	nfin	dep_infinitive	vo	17	np	def	inanim	sg	nomacc
928	Надзирательный	орган	упрекнули тогда в халатном отношении [Показать структуру]		uprekat	PREF	AFFIRM	perfective	no	past	yes	ov	0	np	def	inanim	sg	nomacc
929		Ведомство	обвинили в непредоставлении информации о [Показать структуру]		obvinat	PREF	AFFIRM	perfective	no	past	yes	ov	0	np	def	inanim	sg	nomacc
930	для ведомства настолько затруднительной, что	спасти	ее доверили человеку со стороны. [Показать структуру]		spasat	PREF	AFFIRM	perfective	no	nfin	dep_infinitive	vo	0	pers_pro	def	anim	sg	acc
931	Впрочем,	Любовь	Глебову назвать "человеком со стороны" как-то [Показать структуру]	main	nazyvat	PREF	AFFIRM	perfective	no	nfin	dep_infinitive	ov	0	name	def	anim	sg	acc
932	г-жа Новодворская и г-н Макаркин,	рисуют	нам ужасы сотрудничества с разного [Показать структуру]		risovat	NONPREF	AFFIRM	imperfective	no	present	yes	vo	1	np	indef	inanim	pl	nomacc
933	Мне представляется, что дальше	вести	эту плодотворную и, несомненно, важную [Показать структуру]		vesti	NONPREF	AFFIRM	imperfective	no	nfin	infinitive	vo	0	np	def	inanim	sg	acc
934	своем мнении (но мы, разумеется,	их	все равно ждем и будем им [Показать структуру]		zdat	NONPREF	AFFIRM	imperfective	no	present	yes	ov	0	pers_pro	def	anim	pl	acc
935	Вот об этом, собственно, и	имеет	смысл поговорить. [Показать структуру]		imet	NONPREF	AFFIRM	imperfective	no	present	yes	vo	2	np	generic	inanim	sg	nomacc
936	Собравшиеся обменялись впечатлениями о форуме,	выдвинули	кандидатуры в комитеты, обсудили дальнейшие [Показать структуру]		vydvigat	PREF	AFFIRM	perfective	no	past	yes	vo	0	np	indef	inanim	pl	nomacc
937	Если	формулировать	задачу в предельно общей форме [Показать структуру]		formulirovat	NONPREF	AFFIRM	imperfective	no	nfin	infinitive	vo	0	np	def	inanim	sg	acc
938	в стране действительно будет возможно	провести	честные и свободные выборы. [Показать структуру]		provodit	PREF	AFFIRM	perfective	no	nfin	dep_infinitive	vo	0	np	generic	inanim	pl	nomacc
939	противником того, чтобы Ассамблея начала	формулировать	свой консолидированный взгляд на будущее [Показать структуру]	subordinate	formulirovat	NONPREF	AFFIRM	imperfective	no	nfin	dep_infinitive	vo	0	np	def	inanim	sg	nomacc
940	А вот	создать	комфортную и прозрачную среду для [Показать структуру]		sozdavat	PREF	AFFIRM	perfective	no	nfin	infinitive	vo	0	np	indef	inanim	sg	acc
941	перед людьми, решившими коренным образом	переустроить	жизнь в собственной стране, как [Показать структуру]	subordinate	pereustraivat	PREF	AFFIRM	perfective	no	nfin	dep_infinitive	vo	0	np	def	inanim	sg	nomacc
942	Рост цен на зерновые	бьет	все рекорды. [Показать структуру]		bit	NONPREF	AFFIRM	imperfective	no	present	yes	vo	0	np	indef	inanim	pl	nomacc
943	сельского хозяйства и граждан это	открывает	возможность неплохо подзаработать. [Показать структуру]		otkryvat	PREF	AFFIRM	imperfective	no	present	yes	vo	0	np	generic	inanim	sg	nomacc
944	другой стороны, подорожание зерна может	поставить	крест на животноводстве и подстегнуть [Показать структуру]		stavit	PREF	AFFIRM	perfective	no	nfin	dep_infinitive	vo	0	np	generic	inanim	sg	nomacc
945	Многие поставщики даже не успевают	выполнять	заказы. [Показать структуру]	main	vypolnjat	PREF	AFFIRM	imperfective	no	nfin	dep_infinitive	vo	0	np	indef	inanim	pl	nomacc
946	Рост цен на зерно	дал	аграриям шанс вернуть России статус [Показать структуру]		davat	NONPREF	AFFIRM	perfective	no	past	yes	vo	1	np	generic	inanim	sg	nomacc
947	Еще одна проблема - больше стали	забивать	свиней, и мяса на рынке [Показать структуру]	main	zabivat	PREF	AFFIRM	imperfective	yes	nfin	dep_infinitive	vo	0	np	indef	anim	pl	acc
948	Еще одна проблема - подорожание зерна	разгоняет	инфляцию. [Показать структуру]		razgonjat	PREF	AFFIRM	imperfective	no	present	yes	vo	0	np	generic	inanim	sg	acc
949	Какие бы	программы	ни принимали наши власти, поток [Показать структуру]		prinimat	PREF	NEGAT	imperfective	no	nfin	yes	ov	1	np	indef	inanim	pl	nomacc
950	что жители густонаселенных государств стараются	их	потеснить. [Показать структуру]		tesnit	PREF	AFFIRM	perfective	no	nfin	dep_infinitive	ov	0	pers_pro	def	anim	pl	acc
951	словам экспертов, европейская часть страны	занимает	всего четверть площади государства, но [Показать структуру]		zanimat	PREF	AFFIRM	imperfective	no	present	yes	vo	1	np	indef	inanim	sg	nomacc
952	При этом, добавляет профессор, они	играют	важнейшую роль в экономическом развитии [Показать структуру]		igrat	NONPREF	AFFIRM	imperfective	no	present	yes	vo	0	np	generic	inanim	sg	acc
953	"Немаловажную	роль	играют и нелегалы, - полагает профессор [Показать структуру]		igrat	NONPREF	AFFIRM	imperfective	no	present	yes	ov	0	np	generic	inanim	sg	acc
954	да и мы, потребители, негласно	их	поощряем, покупая подешевле продукцию или [Показать структуру]		pooscrjat	PREF	AFFIRM	imperfective	no	present	yes	ov	0	pers_pro	def	anim	pl	acc
955	государства вместе с тем и	теряют	немалые деньги. [Показать структуру]		terjat	NONPREF	AFFIRM	imperfective	no	present	yes	vo	0	np	indef	inanim	pl	nomacc
956	более 14 миллиардов долларов - суммы,	которые	гастарбайтеры отправляют своим родным и [Показать структуру]	subordinate	otpravljat	PREF	AFFIRM	imperfective	no	present	yes	ov	1	relative_pro	def	inanim	pl	nomacc
957	которыми последние дни на Западе	пугали	Москву. [Показать структуру]		pugat	NONPREF	AFFIRM	imperfective	no	past	yes	vo	0	np	def	inanim	sg	acc
958	Прибалтики полностью отказались от идеи "	протащить	" через ЕС решение об экономическом [Показать структуру]		protaskivat	PREF	AFFIRM	perfective	no	nfin	infinitive	vo	2	np	def	inanim	sg	nomacc
959	Жесткую	позицию	в отношении России также заняли Великобритания [Показать структуру]		zanimat	PREF	AFFIRM	perfective	no	past	yes	ov	4	np	indef	inanim	sg	acc
960	тем, некоторые страны ЕС не	оставляют	попыток "наказать" Россию за ее [Показать структуру]		ostavljat	PREF	NEGAT	imperfective	no	present	yes	vo	0	np	indef	inanim	pl	gen
961	России при ЕС Владимир Чижов	предупредил	накануне лидеров Евросоюза, что принятие [Показать структуру]		preduprezdat	PREF	AFFIRM	perfective	no	past	yes	vo	1	np	def	anim	pl	acc
962	на том, что ЕС должен	занять	жесткую позицию в отношении России, в частности [Показать структуру]	subordinate	zanimat	PREF	AFFIRM	perfective	no	nfin	dep_infinitive	vo	0	np	indef	inanim	sg	acc
963	в основном страны- "новички" ЕС,	подогревая	тем самым противоречия внутри самого [Показать структуру]	subordinate	podogrevat	PREF	AFFIRM	imperfective	yes	nfin	converb	vo	2	np	def	inanim	pl	nomacc
964	этим, если Европе и удастся	выработать	общую позицию по проведению дальнейшей [Показать структуру]	subordinate	vyrabatyvat	PREF	AFFIRM	perfective	no	nfin	dep_infinitive	vo	0	np	indef	inanim	sg	acc
965	в частности приостановлением переговоров по ВТО,	Россию	не испугать. [Показать структуру]		pugat	PREF	NEGAT	perfective	no	nfin	infinitive	ov	1	np	def	inanim	sg	acc
966	Эту замечательную	историю	я слышал от моего друга [Показать структуру]		slysat	NONPREF	AFFIRM	imperfective	no	past	yes	ov	1	np	def	inanim	sg	acc
967	над домашним заданием: ему велено	придумать	вопрос к арифметической задаче, условия [Показать структуру]	main	pridumyvat	PREF	AFFIRM	perfective	no	nfin	dep_infinitive	vo	0	np	indef	inanim	sg	nomacc
968	которые всю неделю без перерыва на сон	комментировали	назначения в правительстве и президентской Администрации [Показать структуру]		kommentirovat	NONPREF	AFFIRM	imperfective	no	past	yes	vo	0	np	def	inanim	pl	nomacc
969	А также удастся ли ему	перевесить	своего возможного оппонента NN. [Показать структуру]	subordinate	perevesivat	PREF	AFFIRM	perfective	no	nfin	dep_infinitive	vo	0	np	def	anim	sg	acc
970	созидатели поставили себе целью максимально	запутать	как подчиненность, так и ответственность. [Показать структуру]		putat	PREF	AFFIRM	perfective	no	nfin	infinitive	vo	1	np	generic	inanim	sg	nomacc
971	Так,	деятельность	Виктора Христенко надлежит координировать аж [Показать структуру]	main	koordinirovat	NONPREF	AFFIRM	imperfective	no	nfin	dep_infinitive	ov	3	np	def	inanim	sg	nomacc
972	появляется отличная возможность выбирать, чьи	команды	выполнять, а чьи нет [Показать структуру]		vypolnjat	PREF	AFFIRM	imperfective	no	nfin	infinitive	ov	0	np	indef	inanim	pl	nomacc
973	Мало того, достаточно внимательно	прочитать	путинское распоряжение о распределении обязанностей [Показать структуру]		citat	PREF	AFFIRM	perfective	no	nfin	infinitive	vo	0	np	def	inanim	sg	nomacc
974	Наконец,	обращает	на себя внимание явно неравномерное [Показать структуру]		obrascat	PREF	AFFIRM	imperfective	no	present	yes	vo	2	np	generic	inanim	sg	nomacc
975	и ММВБ, банки практически перестали	кредитовать	друг друга и население, некоторые [Показать структуру]		kreditovat	NONPREF	AFFIRM	imperfective	no	nfin	dep_infinitive	vo	0	recipr_pro	def	anim	sg	acc
976	Корреспонденты "Труда" выясняли,	что	же собой представляет нынешний кризис [Показать структуру]	subordinate	predstavljat	PREF	AFFIRM	imperfective	no	present	yes	ov	2	inter_pro	indef	inanim	sg	nomacc
977	Банки перестали	выдавать	кредиты [Показать структуру]	main	vydavat	PREF	AFFIRM	imperfective	no	nfin	dep_infinitive	vo	0	np	indef	inanim	pl	nomacc
978	начале недели банк не смог	исполнить	свои обязательства по сделкам РЕПО [Показать структуру]		ispolnjat	PREF	AFFIRM	perfective	no	nfin	dep_infinitive	vo	0	np	def	inanim	pl	nomacc
979	Эксперты не исключают, что	компанию	"КИТ Финансу" составят еще несколько [Показать структуру]		sostavljat	PREF	AFFIRM	perfective	no	future	yes	ov	2	np	def	inanim	sg	acc
980	увлекался иностранными займами и активно	вкладывал	средства в фондовый рынок". [Показать структуру]		vkladyvat	PREF	AFFIRM	imperfective	no	past	yes	vo	0	np	generic	inanim	pl	nomacc
981	среду сообщил "Труду" другой источник:	ссуды	перестали выдавать Русский ипотечный банк [Показать структуру]		vydavat	PREF	AFFIRM	imperfective	no	nfin	dep_infinitive	ov	1	np	indef	inanim	pl	nomacc
982	В самих кредитных организациях эту	информацию	не подтвердили. [Показать структуру]		podtverzdat	PREF	NEGAT	perfective	no	past	yes	ov	1	np	def	inanim	sg	acc
983	свои деньги и не хотят	их	отдавать ни под какой процент [Показать структуру]		otdavat	PREF	AFFIRM	imperfective	no	nfin	dep_infinitive	ov	0	pers_pro	def	anim	pl	acc
984		Разделяем	его и мы, журналисты "Первого [Показать структуру]		razdeljat	PREF	AFFIRM	imperfective	yes	present	yes	vo	0	pers_pro	def	anim	sg	acc
985		Что-то	, по мнению читателей, мы делаем [Показать структуру]	main	delat	NONPREF	AFFIRM	imperfective	no	present	yes	ov	4	indef_pro	indef	inanim	sg	nomacc
986	Например,	нас	спрашивают: "Почему вы ничего не [Показать структуру]		sprasivat	PREF	AFFIRM	imperfective	no	present	yes	ov	0	pers_pro	def	anim	pl	acc
987	Мы	считаем	некорректным, а потому невозможным составление фотороботов в педагогике [Показать структуру]		scitat	PREF	AFFIRM	imperfective	no	present	yes	vo	4	np	generic	inanim	sg	nomacc
988	как дерзнуть грезить, если позавчера	моделировали	человека культуры, вчера - прагматика [Показать структуру]		modelirovat	NONPREF	AFFIRM	imperfective	no	past	yes	vo	0	np	generic	anim	sg	acc
989	сфере образования еще в мае	направил	в регионы Методические рекомендации по проведению августовских педагогических совещаний на тему "Актуальные задачи современной модели образования". [Показать структуру]		napravljat	PREF	AFFIRM	perfective	no	past	yes	vo	2	np	def	inanim	pl	nomacc
990	Сегодня	модель	- 2020 обсуждают все. [Показать структуру]		obsuzdat	PREF	AFFIRM	imperfective	no	present	yes	ov	0	np	def	inanim	sg	nomacc
991	…	Построить	модель - значит систематизировать действительность под определенным углом зрения. [Показать структуру]		stroit	PREF	AFFIRM	perfective	no	nfin	infinitive	vo	0	np	indef	inanim	sg	nomacc
992		Упразднить	все частное, непредсказуемое в ней [Показать структуру]		uprazdnjat	PREF	AFFIRM	perfective	no	nfin	infinitive	vo	0	np	indef	inanim	sg	nomacc
993		Нечто	единое разобрать на элементы и [Показать структуру]		razbirat	PREF	AFFIRM	perfective	no	nfin	infinitive	ov	0	np	indef	inanim	sg	nomacc
994	Премьер-министр РФ Владимир Путин	подписал	распоряжение о переводе Государственного университета [Показать структуру]		podpisyvat	PREF	AFFIRM	perfective	no	past	yes	vo	0	np	def	inanim	sg	nomacc
995	На протяжении многих лет университет	выполнял	экспертную работу не только для [Показать структуру]		vypolnjat	PREF	AFFIRM	imperfective	no	past	yes	vo	0	np	generic	inanim	sg	acc
996	году открылся новый факультет математики,	который	создала группа математиков, пришедших из [Показать структуру]	subordinate	sozdavat	PREF	AFFIRM	perfective	no	past	yes	ov	0	relative_pro	def	inanim	sg	nomacc
997	Выпускники ГУ-ВШЭ уже	зарекомендовали	себя как профессиональные сотрудники. [Показать структуру]		zarekomendovyvat	PREF	AFFIRM	perfective	no	past	yes	vo	0	refl_pro	def	anim	pl	acc
998	С другой стороны, часть выпускников	выбирает	работу в правительственном секторе, для [Показать структуру]		vybirat	PREF	AFFIRM	imperfective	yes	present	yes	vo	0	np	generic	inanim	sg	acc
999	Это	даст	ей значительные дополнительные права по сравнению с [Показать структуру]		davat	NONPREF	AFFIRM	perfective	no	future	yes	ov	1	np	indef	inanim	pl	nomacc
1000	"Государство и дальше будет	определять	стратегию развития университета, задавать определенные [Показать структуру]	main	opredeljat	PREF	AFFIRM	imperfective	no	nfin	dep_infinitive	vo	0	np	def	inanim	sg	acc
1001	Если	провести	… параллель между вузом и рестораном [Показать структуру]		provodit	PREF	AFFIRM	perfective	no	nfin	infinitive	vo	0	np	generic	inanim	sg	nomacc
1002	существующими разночтениями законов некоторые вузы	ведут	себя как подростки - продолжают брать [Показать структуру]		vesti	NONPREF	AFFIRM	imperfective	no	present	yes	vo	0	refl_pro	def	anim	pl	acc
1003	о "взрослых" университетах, которые хорошо	зарекомендовали	себя годами профессиональной деятельности, наработали [Показать структуру]		zarekomendovyvat	PREF	AFFIRM	perfective	no	past	yes	vo	0	refl_pro	def	anim	pl	acc
1004	слабых преподавателей, высшая школа не	производит	инноваций. [Показать структуру]		proizvodit	PREF	NEGAT	imperfective	no	present	yes	vo	0	np	indef	inanim	pl	gen
1005	если сегодня продолжительность обучения россиянина	составляет	в среднем четверть века (от [Показать структуру]		sostavljat	PREF	AFFIRM	imperfective	yes	present	yes	vo	2	np	indef	inanim	sg	nomacc
1006	разных этапах профессиональной карьеры), а	контролировать	качество предоставляемых услуг доверят профессиональному [Показать структуру]		kontrolirovat	NONPREF	AFFIRM	imperfective	no	nfin	dep_infinitive	vo	0	np	generic	inanim	sg	nomacc
1007	двухуровневой системы станет бакалавриат, и	обучение	на этой ступени, по прогнозам авторов новой модели, смогут пройти до 70 % выпускников школ [Показать структуру]		prohodit	PREF	AFFIRM	perfective	no	nfin	dep_infinitive	ov	9	np	generic	inanim	sg	nomacc
1008	реальным в том случае, если	право	на подготовку бакалавров наряду с вузами получат техникумы [Показать структуру]		polucat	PREF	AFFIRM	perfective	no	future	yes	ov	6	np	def	inanim	sg	nomacc
1009	Наряду с вузами и техникумами,	реализующими	программы академического и прикладного бакалавриата [Показать структуру]	subordinate	realizovyvat	NONPREF	AFFIRM	imperfective	no	present	participle	vo	0	np	indef	inanim	pl	nomacc
1010	Что	касается	ПТУ, то им придется выдержать конкуренцию с учебными центрами [Показать структуру]	main	vyderzivat	PREF	AFFIRM	perfective	no	nfin	dep_infinitive	vo	0	np	generic	inanim	sg	acc
1011	с дипломом об образовании будут	получать	свидетельство, оценивающее их профессиональные компетенции [Показать структуру]		polucat	PREF	AFFIRM	imperfective	no	nfin	dep_infinitive	vo	0	np	indef	inanim	sg	nomacc
1012	Так, разработчики считают необходимым	принять	федеральные целевые программы для поддержки [Показать структуру]		prinimat	PREF	AFFIRM	perfective	no	nfin	infinitive	vo	0	np	indef	inanim	pl	nomacc
1013	К 2010 году планируется	завершить	организационный переход к профильному обучению [Показать структуру]	main	zaversat	PREF	AFFIRM	perfective	no	nfin	dep_infinitive	vo	0	np	generic	inanim	sg	nomacc
1014	На прошлой неделе Министерство образования	опубликовало	список вузов, допущенных к проведению [Показать структуру]		publikovat	PREF	AFFIRM	perfective	no	past	yes	vo	0	np	indef	inanim	sg	nomacc
1015	и студенты 112 вузов смогут	получить	льготные кредиты на учебу. [Показать структуру]		polucat	PREF	AFFIRM	perfective	no	nfin	dep_infinitive	vo	0	np	indef	inanim	pl	nomacc
1016	августе прошлого года правительство решило	провести	образовательный эксперимент, в рамках которого [Показать структуру]		provodit	PREF	AFFIRM	perfective	no	nfin	dep_infinitive	vo	0	np	indef	inanim	sg	nomacc
1017	на прошлой неделе Министерство образования	опубликовало	список из 112 вузов, допущенных [Показать структуру]		publikovat	PREF	AFFIRM	perfective	no	past	yes	vo	0	np	indef	inanim	sg	nomacc
1018	В рамках эксперимента студенты смогут	занять	денег на оплату как основного [Показать структуру]	main	zanimat	PREF	AFFIRM	perfective	no	nfin	dep_infinitive	vo	0	np	indef	inanim	pl	gen
1019	Вторая сумма	учитывает	прожиточный минимум. [Показать структуру]		ucityvat	PREF	AFFIRM	imperfective	yes	present	yes	vo	0	np	generic	inanim	sg	nomacc
1020	При этом банки не смогут	взимать	с заемщика дополнительные платежи, а [Показать структуру]	main	vzimat	PREF	AFFIRM	imperfective	no	nfin	dep_infinitive	vo	2	np	indef	inanim	pl	nomacc
1021	Эту	роль	, по идее разработчиков, возьмут на [Показать структуру]		brat	PREF	AFFIRM	perfective	no	future	yes	ov	3	np	def	inanim	sg	acc
1022	Таким образом, студенты смогут	оформлять	кредиты сами, без помощи родителей [Показать структуру]	main	oformljat	PREF	AFFIRM	imperfective	no	nfin	dep_infinitive	vo	0	np	indef	inanim	pl	nomacc
1023	На Сахалине	вводят	хлебные карточки. [Показать структуру]		vvodit	PREF	AFFIRM	imperfective	no	present	yes	vo	0	np	generic	inanim	pl	nomacc
1024	забавное, что многие экономисты не	видят	в карточках ничего трагичного. [Показать структуру]	subordinate	videt	NONPREF	NEGAT	imperfective	no	present	yes	vo	2	neg_pro	indef	inanim	sg	gen
1025	И нынешние фиксированные	цены	, во-первых, просто физически не удастся удерживать долго [Показать структуру]	main	uderzivat	PREF	AFFIRM	imperfective	yes	nfin	dep_infinitive	ov	5	np	def	inanim	pl	nomacc
1026	Каких только	лозунгов	ни выкликали, а хлеба не [Показать структуру]		vyklikivat	PREF	NEGAT	imperfective	yes	past	yes	ov	1	np	indef	inanim	pl	gen
1027	После "хлеба"	граждан	волновали только "зрелища". [Показать структуру]		volnovat	NONPREF	AFFIRM	imperfective	no	past	yes	vo	0	np	generic	anim	pl	acc
1028	Завтра Дума	утвердит	Путина на посту премьер-министра. [Показать структуру]		utverzdat	PREF	AFFIRM	perfective	no	future	yes	vo	0	np	def	anim	sg	acc
1029	Поэтому неприятную	миссию	вчера взял на себя прежний [Показать структуру]		brat	PREF	AFFIRM	perfective	no	past	yes	ov	1	np	def	inanim	sg	acc
1030	министров России Виктор Зубков высоко	оценил	работу возглавляемого им правительства, но [Показать структуру]		ocenivat	PREF	AFFIRM	perfective	no	past	yes	vo	0	np	def	inanim	sg	acc
1031	реагировать на мировую экономическую конъюнктуру,	стабилизировать	цены на продовольственных рынках внутри [Показать структуру]		stabilizirovat	NONPREF	AFFIRM	imperfective	no	nfin	dep_infinitive	vo	0	np	indef	inanim	pl	nomacc
1032	изменения цен на либерализуемых рынках,	которые	МЭРТ выработало с другими министерствами [Показать структуру]	subordinate	vyrabatyvat	PREF	AFFIRM	perfective	no	past	yes	ov	1	relative_pro	def	inanim	pl	nomacc
1033	последствием роста тарифов станет уже	измучившая	российское население инфляция. [Показать структуру]	subordinate	mucit	PREF	AFFIRM	perfective	no	past	participle	vo	0	np	def	inanim	sg	nomacc
1034	Все компании "большой четверки" охотно	берут	выпускников или студентов московских вузов [Показать структуру]		brat	NONPREF	AFFIRM	imperfective	no	present	yes	vo	0	np	generic	anim	pl	acc
1035	отчетов, балансов, проводок - аудиторам приходится	инспектировать	склады и производственные объекты. [Показать структуру]		inspektirovat	NONPREF	AFFIRM	imperfective	no	nfin	dep_infinitive	vo	0	np	indef	inanim	pl	nomacc
1036	большой четверки" аудиторских компаний, которые	проверяют	ведущие российские предприятия. [Показать структуру]		proverjat	PREF	AFFIRM	imperfective	no	present	yes	vo	0	np	indef	inanim	pl	nomacc
1037	Конечно,	проверить	все невозможно, поэтому аудитор делает [Показать структуру]	main	proverjat	PREF	AFFIRM	perfective	no	nfin	dep_infinitive	vo	0	all	def	inanim	sg	nomacc
1038	холдинга Игорю (имя изменено) потребовалось	проверить	наличие труб на складе. [Показать структуру]		proverjat	PREF	AFFIRM	perfective	no	nfin	dep_infinitive	vo	0	np	generic	inanim	sg	nomacc
1039	а завхоз отвечает, что они	делают	это только раз в год [Показать структуру]	subordinate	delat	NONPREF	AFFIRM	imperfective	no	present	yes	vo	0	dem_pro	def	inanim	sg	nomacc
1040	Тогда Игорю пришлось	считать	трубы, мерить шагами их длину [Показать структуру]	main	scitat	PREF	AFFIRM	imperfective	no	nfin	dep_infinitive	vo	0	np	indef	inanim	pl	nomacc
1041	аудитор, когда пришел на проверку,	обнаружил	вместо ожидаемых труб гору снега [Показать структуру]		obnaruzyvat	PREF	AFFIRM	perfective	no	past	yes	vo	3	np	indef	inanim	sg	acc
1042	Оказалось, что	их	занесло. [Показать структуру]		zanosit	PREF	AFFIRM	perfective	no	past	yes	ov	0	pers_pro	def	anim	pl	acc
1043	Пришлось	вызывать	бригаду с лопатами и руководить [Показать структуру]	main	vyzyvat	PREF	AFFIRM	imperfective	yes	nfin	dep_infinitive	vo	0	np	indef	inanim	sg	acc
1044	стало модным хвастаться привычкой не	смотреть	телевизор. [Показать структуру]		smotret	NONPREF	NEGAT	imperfective	no	nfin	infinitive	vo	0	np	generic	inanim	sg	nomacc
1045		Имеют	в виду, конечно, информационные и политические передачи. [Показать структуру]		imet	NONPREF	AFFIRM	imperfective	no	present	yes	vo	3	np	indef	inanim	pl	nomacc
1046	прослыть интеллигентом, признаюсь, что я	их	тоже не смотрю. [Показать структуру]		smotret	NONPREF	NEGAT	imperfective	no	present	yes	ov	2	pers_pro	def	anim	pl	acc
1047	Недавно, правда,	смотрел	инаугурацию - вместе с другими телезрителями [Показать структуру]		smotret	NONPREF	AFFIRM	imperfective	no	past	yes	vo	0	np	def	inanim	sg	acc
1048	люблю играть с пультом, быстро	переключая	каналы. [Показать структуру]	subordinate	perekljucat	PREF	AFFIRM	imperfective	no	nfin	converb	vo	0	np	indef	inanim	pl	nomacc
1049	во мне романтической надежды: вдруг	увижу	что-то интересное. [Показать структуру]	main	videt	PREF	AFFIRM	perfective	no	future	yes	vo	0	indef_pro	indef	inanim	sg	nomacc
1050	играю с пультом, и вдруг	вижу	знакомое лицо Володи Кара-Мурзы, привычно [Показать структуру]		videt	NONPREF	AFFIRM	imperfective	no	present	yes	vo	0	np	def	inanim	sg	nomacc
1051	финале - я, собственно, из-за этого	все	и рассказываю. [Показать структуру]	main	rasskazyvat	PREF	AFFIRM	imperfective	no	present	yes	ov	1	all	def	inanim	sg	nomacc
1052	удивился: что это они, собственно,	ее	петь начали? [Показать структуру]		pet	NONPREF	AFFIRM	imperfective	no	nfin	dep_infinitive	ov	0	pers_pro	def	inanim	sg	acc
1053	Они	чувствуют	людей, их настроения. [Показать структуру]		cuvstvovat	NONPREF	AFFIRM	imperfective	no	present	yes	vo	0	np	generic	anim	pl	acc
1054		Проблему	дефицита квалифицированных работников ощущают и [Показать структуру]		oscuscat	PREF	AFFIRM	imperfective	no	present	yes	ov	3	np	def	inanim	sg	acc
1055	том, что при необходимости смогут	найти	хорошую работу по специальности. [Показать структуру]	subordinate	nahodit	PREF	AFFIRM	perfective	no	nfin	dep_infinitive	vo	0	np	generic	inanim	sg	acc
1056	Можно ли	исправить	ситуацию, пытался понять корреспондент НТВ [Показать структуру]	subordinate	ispravljat	PREF	AFFIRM	perfective	no	nfin	dep_infinitive	vo	0	np	def	inanim	sg	acc
1057		Джунгли	российского капитализма прочесывает уже не [Показать структуру]		procesyvat	PREF	AFFIRM	imperfective	yes	present	yes	ov	2	np	def	inanim	pl	nomacc
1058	У них не хватает мотивации	что-то	сделать. [Показать структуру]	main	delat	PREF	AFFIRM	perfective	no	nfin	infinitive	ov	0	indef_pro	indef	inanim	sg	nomacc
1059	Это когда у соискателя работы выбор больше, чем у тех, кто	ее	дает. [Показать структуру]		davat	NONPREF	AFFIRM	imperfective	no	present	yes	ov	0	pers_pro	def	inanim	sg	acc
1060		Специалистов	в России оценивают все дороже [Показать структуру]		ocenivat	PREF	AFFIRM	imperfective	yes	present	yes	ov	2	np	indef	anim	pl	acc
1061	В некоторых федеральных округах ребята,	закончившие	, скажем, техникумы, то есть получившие среднее [Показать структуру]	subordinate	zakancivat	PREF	AFFIRM	perfective	no	past	participle	vo	1	np	indef	inanim	pl	nomacc
1062	кто будет обслуживать, строить и	обслуживать	, скажем, нитки нефтепроводов, газопроводов. [Показать структуру]		obsluzivat	PREF	AFFIRM	imperfective	yes	nfin	dep_infinitive	vo	1	np	indef	inanim	pl	nomacc
1063	Украинская газета "Зеркало недели"	опубликовала	19 апреля статью "Раздень Гитлера [Показать структуру]		publikovat	PREF	AFFIRM	perfective	no	past	yes	vo	2	np	def	inanim	sg	acc
1064	Раз уж кукла продается и автор статьи Андрей Капустин	ее	обнаружил, то он позволил себе [Показать структуру]		obnaruzyvat	PREF	AFFIRM	perfective	no	past	yes	ov	0	pers_pro	def	inanim	sg	acc
1065	как родители будут помогать детям	надевать	на куклу маленькие Железные кресты [Показать структуру]		nadevat	PREF	AFFIRM	imperfective	no	nfin	dep_infinitive	vo	2	np	indef	inanim	pl	nomacc
1066	различные зарубежные газеты и агентства	распространили	эту новость. [Показать структуру]		rasprostranat	PREF	AFFIRM	perfective	no	past	yes	vo	0	np	def	inanim	sg	acc
1067	Появились сотни заметок, где	факты	переврали. [Показать структуру]		perevirat	PREF	AFFIRM	perfective	no	past	yes	ov	0	np	def	inanim	pl	nomacc
1068	сказала, что если кукла будет	иметь	успех, то производитель выпустит игрушечную [Показать структуру]	subordinate	imet	NONPREF	AFFIRM	imperfective	no	nfin	dep_infinitive	vo	0	np	generic	inanim	sg	nomacc
1069		Это	написала "Дэйли мэйл". [Показать структуру]	main	pisat	PREF	AFFIRM	perfective	no	past	yes	ov	0	dem_pro	def	inanim	sg	nomacc
1070	Ну а российский Первый канал	сделал	по этому поводу сюжет. [Показать структуру]		delat	PREF	AFFIRM	perfective	no	past	yes	vo	3	np	indef	inanim	sg	nomacc
1071	киевский журналист Андрей Куликов, который	ведет	программу "Свобода слова" на украинском [Показать структуру]		vesti	NONPREF	AFFIRM	imperfective	no	present	yes	vo	0	np	def	inanim	sg	acc
1072	и аналитики Высшей школы экономики	разработали	проект, по которому государству предлагалось [Показать структуру]		razrabatyvat	PREF	AFFIRM	perfective	no	past	yes	vo	0	np	indef	inanim	sg	nomacc
1073	Этот	проект	поддерживал Российский союз промышленников и [Показать структуру]		podderzivat	PREF	AFFIRM	imperfective	yes	past	yes	ov	0	np	def	inanim	sg	nomacc
1074	По словам депутата Владимира Рыжкова,	продвигавшего	проект в Госдуме, цена такой [Показать структуру]	subordinate	prodvigat	PREF	AFFIRM	imperfective	no	past	participle	vo	0	np	def	inanim	sg	nomacc
1075	Однако Министерство образования и науки	предпочло	более экономный вариант и решило [Показать структуру]		predpocitat	PREF	AFFIRM	perfective	no	past	yes	vo	1	np	indef	inanim	sg	nomacc
1076	В нынешнем виде эксперимент предполагает, что если недобросовестный заемщик не	вернет	банку кредит, , то тот сможет получить 10 % от суммы невозврата. [Показать структуру]		vozvrascat	NONPREF	NEGAT	perfective	no	future	yes	vo	1	np	generic	inanim	sg	nomacc
1077	Сперва заемщик	заключает	с вузом договор об оказании [Показать структуру]		zakljucat	PREF	AFFIRM	imperfective	no	present	yes	vo	2	np	generic	inanim	sg	nomacc
1078	После того как абитуриент	найдет	компанию, готовую за него поручиться [Показать структуру]		nahodit	PREF	AFFIRM	perfective	no	future	yes	vo	0	np	indef	inanim	sg	acc
1079	При этом заемщик может	взять	деньги как на основное или [Показать структуру]	main	brat	PREF	AFFIRM	perfective	no	nfin	dep_infinitive	vo	0	np	generic	inanim	sg	nomacc
1080	Свидетели по-разному	описывали	ее форму, называя то "таблеткой [Показать структуру]		opisyvat	PREF	AFFIRM	imperfective	yes	past	yes	vo	0	np	def	inanim	sg	nomacc
1081	Если не	считать	странных изображений в Северной Африке, которые уфологи толкуют как "картины с натуры", одно из первых в европейской истории упоминаний НЛО относится ко времени Александра Македонского. [Показать структуру]		scitat	PREF	NEGAT	imperfective	no	nfin	infinitive	vo	0	np	indef	inanim	pl	gen
1082	на армию Александра, когда та	пересекала	реку в Индии; в 322 [Показать структуру]		peresekat	PREF	AFFIRM	perfective	no	past	yes	vo	0	np	indef	inanim	sg	acc
1083	Некоторые исследователи Библии	видят	описание НЛО в словах пророка [Показать структуру]		videt	NONPREF	AFFIRM	imperfective	no	present	yes	vo	0	np	def	inanim	sg	nomacc
1084	А	портрет	обитателей "огня" и "сияния" расценивают [Показать структуру]		rascenivat	PREF	AFFIRM	imperfective	no	present	yes	ov	4	np	def	inanim	sg	nomacc
1085	которые имели или могли бы	иметь	вполне земное происхождение, разразился чуть [Показать структуру]	subordinate	imet	NONPREF	AFFIRM	imperfective	no	nfin	dep_infinitive	vo	1	np	generic	inanim	sg	nomacc
1086	любитель Кеннет Арнольд сообщил, что	видел	в горах Кэскейдс на северо-западе США группу из девяти дискообразных аппаратов, летящих волнообразно, "словно тарелка по воде". [Показать структуру]		videt	NONPREF	AFFIRM	imperfective	no	past	yes	vo	6	np	indef	inanim	sg	acc
1087	Они двигались диагональным строем,	выполняя	невероятные маневры, а потом улетели [Показать структуру]	subordinate	vypolnjat	PREF	AFFIRM	imperfective	no	nfin	converb	vo	0	np	indef	inanim	pl	nomacc
1088	лет начались испытания его самолета,	получившего	название "Блинчик" (двигатели и кабина [Показать структуру]	subordinate	polucat	PREF	AFFIRM	perfective	no	past	participle	vo	0	np	def	inanim	sg	nomacc
1089	После войны	финансирование	программы "Блинчика" (или, как его тогда официально назвали в ВВС, "Шумовки") внесли в бюджет [Показать структуру]		nazyvat	PREF	AFFIRM	perfective	no	past	yes	vo	2	pers_pro	def	inanim	sg	acc
1090	массе своей не только не	почувствовали	пока на себе последствий мирового [Показать структуру]		cuvstvovat	PREF	NEGAT	perfective	no	past	yes	vo	3	np	indef	inanim	pl	gen
1091	Стоит ли нам	сохранять	благостность и оптимизм или нужно [Показать структуру]	main	sohranjat	PREF	AFFIRM	imperfective	yes	nfin	dep_infinitive	vo	0	np	generic	inanim	sg	nomacc
1092	- Евгений Григорьевич, если	смотреть	новости по телевизору, возникает ощущение [Показать структуру]		smotret	NONPREF	AFFIRM	imperfective	no	nfin	infinitive	vo	0	np	indef	inanim	pl	nomacc
1093	впечатление, что кризис всерьез не	затронет	Россию. [Показать структуру]		zatragivat	PREF	NEGAT	perfective	no	future	yes	vo	0	np	def	inanim	sg	acc
1094	- Кризис	нас	уже затронул. [Показать структуру]		zatragivat	PREF	AFFIRM	perfective	no	past	yes	ov	1	pers_pro	def	anim	pl	acc
1095	а может быть, и большинство	испытывают	трудности с получением кредита. [Показать структуру]		ispytyvat	PREF	AFFIRM	imperfective	yes	present	yes	vo	0	np	generic	inanim	pl	nomacc
1096	обойтись без кредитов, каким-то образом	пролонгировать	свои обязательства - ну, как когда-то [Показать структуру]		prolongirovat	PREF	AFFIRM	perfective	no	nfin	dep_infinitive	vo	0	np	def	inanim	pl	nomacc
1097	нефть, от экспорта которой страна	получает	основные доходы, за последнее время [Показать структуру]		polucat	PREF	AFFIRM	imperfective	no	present	yes	vo	0	np	generic	inanim	pl	nomacc
1098	долларов за баррель, то мы	это	перенесем. [Показать структуру]	subordinate	perenosit	PREF	AFFIRM	perfective	no	future	yes	ov	0	dem_pro	def	inanim	sg	nomacc
1099		Подводя	итоги года, практически все издания [Показать структуру]	subordinate	podvodit	PREF	AFFIRM	imperfective	no	nfin	converb	vo	0	np	generic	inanim	pl	nomacc
1100	Но коллеги из Popular Mechanics	нашли	свой путь: представляем их рейтинг [Показать структуру]		nahodit	PREF	AFFIRM	perfective	no	past	yes	vo	0	np	def	inanim	sg	nomacc
1101	одно дело, когда вы всерьез	делаете	приседания, отжимания или, скажем, подтягиваетесь [Показать структуру]		delat	NONPREF	AFFIRM	imperfective	no	present	yes	vo	0	np	indef	inanim	pl	nomacc
1102	А когда	вас	встряхивают, но сами вы при [Показать структуру]		vstrjahivat	PREF	AFFIRM	imperfective	no	present	yes	ov	0	pers_pro	def	anim	pl	acc
1103	американской редакции Popular Mechanics, согласившиеся	опробовать	на себе эту штуку, докладывали [Показать структуру]	subordinate	oprobovat	PREF	AFFIRM	perfective	no	nfin	dep_infinitive	vo	2	np	def	inanim	sg	acc
1104	просто вибрирует, а РЕАЛЬНО вибрирует,	превращая	тренирующегося в живое подобие отбойного [Показать структуру]	subordinate	prevrascat	PREF	AFFIRM	imperfective	no	nfin	converb	vo	0	np	generic	anim	sg	nomacc
1105		Помните	комплекты виртуальной реальности? [Показать структуру]		pomnit	PREF	AFFIRM	imperfective	no	present	yes	vo	0	np	generic	inanim	pl	nomacc
1106	дисплеям, беспроводным джойстикам и возможностям	обложить	как следует другого игрока, находящегося [Показать структуру]		obkladyvat	PREF	AFFIRM	perfective	no	nfin	infinitive	vo	2	np	indef	anim	sg	acc
1107	повороте головы игрока они автоматически	прокручивают	изображение в нужную сторону, создавая [Показать структуру]		prokrucivat	PREF	AFFIRM	imperfective	yes	present	yes	vo	0	np	generic	inanim	sg	nomacc
1108	Компания 3001 AD решила	осчастливить	этим геймеров, создав игровой комплект [Показать структуру]	main	oscastlivlivat	PREF	AFFIRM	perfective	no	nfin	dep_infinitive	vo	1	np	indef	anim	pl	nomacc
1109	Сначала мы	рассмотрим	эндогенные (внутренние) факторы, а потом [Показать структуру]		rassmatrivat	PREF	AFFIRM	perfective	no	future	yes	vo	0	np	indef	inanim	pl	nomacc
1110	понятнее, если воспользоваться исторической аналогией,	понимая	все ограничения такого приема. [Показать структуру]	subordinate	ponimat	PREF	AFFIRM	imperfective	no	nfin	converb	vo	0	np	indef	inanim	pl	nomacc
1111	технической интеллигенции, которая должна была	обеспечить	"ускорение" - именно эту задачу в [Показать структуру]	subordinate	obespecivat	PREF	AFFIRM	perfective	no	nfin	dep_infinitive	vo	0	np	generic	inanim	sg	nomacc
1112	провалилось, началась "перестройка" и понадобилось	расширить	круг мобилизуемых элит - эту задачу [Показать структуру]		rassirjat	PREF	AFFIRM	perfective	no	nfin	dep_infinitive	vo	0	np	def	inanim	sg	nomacc
1113	я хочу вернуться к теме,	которую	развивал в статье "Транзит- 4 [Показать структуру]	subordinate	razvivat	PREF	AFFIRM	imperfective	yes	past	yes	ov	0	relative_pro	def	inanim	sg	acc
1114	регулирующих устройств можно относительно стабильно	поддерживать	(в рамках заданной точности) температуру [Показать структуру]	subordinate	podderzivat	PREF	AFFIRM	imperfective	yes	nfin	dep_infinitive	vo	4	np	generic	inanim	sg	acc
1115	казалось, к примеру, что можно	запланировать	стабильную экономику с заданным наперед процентным отношением плана и рынка. [Показать структуру]		planirovat	PREF	AFFIRM	perfective	no	nfin	dep_infinitive	vo	0	np	generic	inanim	sg	acc
1116	демократии и авторитаризма, где процентное	отношение	тоже можно чуть ли не задать. [Показать структуру]	subordinate	zadavat	PREF	AFFIRM	perfective	no	nfin	dep_infinitive	ov	5	np	generic	inanim	sg	nomacc
1117	Таким образом, предложенная мной аналогия	выявляет	общность примитивных представлений о социальном [Показать структуру]		vyjavljat	PREF	AFFIRM	imperfective	no	present	yes	vo	0	np	generic	inanim	sg	nomacc
1118	шахтеров Урала и рабочих Тюмени -	поставила	страну перед новой реальностью: россияне [Показать структуру]		stavit	PREF	AFFIRM	perfective	no	past	yes	vo	0	np	def	inanim	sg	acc
1119	А там еще	чего-нибудь	придумаем и организуем… [Показать структуру]	main	pridumyvat	PREF	AFFIRM	perfective	no	future	yes	ov	0	indef_pro	indef	inanim	sg	gen
1120	Эти люди полагают, что	ничего	заимствовать не надо. [Показать структуру]	subordinate	zaimstvovat	PREF	NEGAT	imperfective	no	nfin	dep_infinitive	ov	0	neg_pro	indef	inanim	sg	gen
1121		Плесните	колдовства! [Показать структуру]		pleskat	NONPREF	AFFIRM	perfective	no	nfin	yes	vo	0	np	generic	inanim	sg	gen
1122	года английский египтолог Говард Джонс	прислал	в Москву, в лабораторию антропологической реконструкции Института этнологии и антропологии им. Н. Н. Миклухо-Маклая РАН, рентгеновские снимки черепов трех мумий из коллекции Британского музея. [Показать структуру]		prisylat	PREF	AFFIRM	perfective	no	past	yes	vo	15	np	indef	inanim	pl	nomacc
1123	одной рентгенограмме было известно, что	ее	сделали с останков фараона Меренптаха [Показать структуру]		delat	PREF	AFFIRM	perfective	no	past	yes	ov	0	pers_pro	def	anim	sg	acc
1124	Относительно принадлежности двух других мумий	специалистов	терзали сомнения. [Показать структуру]		terzat	NONPREF	AFFIRM	imperfective	no	past	yes	ov	0	np	indef	anim	pl	acc
1125	два года назад британская полиция	задержала	в Лондоне некоего антиквара из [Показать структуру]		zaderzivat	PREF	AFFIRM	perfective	no	past	yes	vo	2	np	indef	anim	sg	acc
1126	Джонс и его коллеги- египтологи	потирали	руки в предвкушении того, что [Показать структуру]		potirat	PREF	AFFIRM	imperfective	yes	past	yes	vo	0	np	def	inanim	pl	nomacc
1127	основе рентгенограмм российские антропологи сначала	сделали	контурные рисунки, а уже затем [Показать структуру]		delat	PREF	AFFIRM	perfective	no	past	yes	vo	0	np	indef	inanim	pl	nomacc
1128	самого начала, то второй "незнакомец"	преподнес	сюрприз. [Показать структуру]		predpodnosit	PREF	AFFIRM	perfective	no	past	yes	vo	0	np	indef	inanim	sg	nomacc
1129	Они позволяют дизайнерам	сделать	вещи эргономичными и удобными. [Показать структуру]	main	delat	PREF	AFFIRM	perfective	no	nfin	dep_infinitive	vo	0	np	generic	inanim	pl	nomacc
1130	Рынок клиентов,	использующих	при проектировании новой продукции виртуальные манекены [Показать структуру]	subordinate	ispolzovat	PREF	AFFIRM	imperfective	no	present	participle	vo	4	np	generic	inanim	pl	nomacc
1131	Они	выдают	рекомендации дизайнерам, как сделать вещи [Показать структуру]		vydavat	PREF	AFFIRM	imperfective	no	present	yes	vo	0	np	indef	inanim	pl	nomacc
1132	При создании автомобиля они позволяют с максимальной точностью	реализовать	все запланированные удобства. [Показать структуру]	main	realizovyvat	NONPREF	AFFIRM	imperfective	no	nfin	dep_infinitive	vo	0	np	generic	inanim	pl	nomacc
1133	Подобный манекен	имеет	"скелет". [Показать структуру]		imet	NONPREF	AFFIRM	imperfective	no	present	yes	vo	0	np	generic	inanim	sg	nomacc
1134	Умная навигация позволяет оператору	имитировать	положения тела, когда человек, например [Показать структуру]	main	imitirovat	NONPREF	AFFIRM	imperfective	no	nfin	dep_infinitive	vo	0	np	generic	inanim	pl	nomacc
1135	могут быстро вырасти или укоротиться,	набрать	вес или похудеть. [Показать структуру]		nabirat	PREF	AFFIRM	perfective	no	nfin	dep_infinitive	vo	0	np	generic	inanim	sg	nomacc
1136	В прошлом, 2002 году весь	рынок	виртуальных манекенов "держали" три компании [Показать структуру]		derzat	NONPREF	AFFIRM	imperfective	no	past	yes	ov	2	np	def	inanim	sg	nomacc
1137	российских реставраторов настолько мал, что	гарантий	успеха операции по восстановлению панно они просто не могли дать. [Показать структуру]	subordinate	davat	NONPREF	NEGAT	perfective	no	nfin	dep_infinitive	ov	9	np	generic	inanim	pl	gen
1138	с ним: "заплатить за телефон", "	бросить	денег на телефон", "покормить трубку [Показать структуру]		brosat	NONPREF	AFFIRM	perfective	no	nfin	infinitive	vo	0	np	indef	inanim	pl	gen
1139	Земле, а сторонники божественной шестидневки	ничего	определенного по поводу чрезмерной любви творца к клещам и тараканам сказать не могут. [Показать структуру]	main	govorit	NONPREF	NEGAT	perfective	no	nfin	dep_infinitive	ov	8	np	indef	inanim	sg	gen
1140	Тогда	ничего	"чужого" знать было нельзя - только [Показать структуру]	main	znat	NONPREF	NEGAT	imperfective	no	nfin	dep_infinitive	ov	0	np	indef	inanim	sg	gen
1141	Так что о лодках	ничего	сказать не могу. [Показать структуру]	main	govorit	PREF	NEGAT	perfective	no	nfin	dep_infinitive	ov	0	neg_pro	indef	inanim	sg	gen
1142	с их запоминающими устройствами позволяет	накапливать	информацию, по объему соответствующую масштабам [Показать структуру]		nakaplivat	PREF	AFFIRM	imperfective	yes	nfin	dep_infinitive	vo	0	np	indef	inanim	sg	acc
1143	объединению научного, технического, социального опыта,	сделает	его общедоступным. [Показать структуру]		delat	PREF	AFFIRM	perfective	no	future	yes	vo	0	pers_pro	def	inanim	sg	acc
1144		Что	сулит новый способ обработки металла [Показать структуру]	main	sulit	NONPREF	AFFIRM	imperfective	no	present	yes	ov	0	inter_pro	indef	inanim	sg	nomacc
1145	Он позволяет	видоизменять	его свойства и получать изделия [Показать структуру]	main	vidoizmenjat	PREF	AFFIRM	imperfective	yes	nfin	dep_infinitive	vo	1	np	def	inanim	pl	nomacc
1146	тонкий металлический стержень, а ведь	вытачивать	его из обычной заготовки сложно [Показать структуру]		vytacivat	PREF	AFFIRM	imperfective	yes	nfin	infinitive	vo	0	pers_pro	def	inanim	sg	acc
1147		Заготовку	с усилием продавливают через специальное [Показать структуру]		prodavlivat	PREF	AFFIRM	imperfective	yes	present	yes	ov	2	np	generic	inanim	sg	acc
1148	Горячее	прессование	освоили еще в прошлом веке [Показать структуру]		osvaivat	PREF	AFFIRM	perfective	no	past	yes	ov	0	np	generic	inanim	sg	nomacc
1149		Способы	борьбы с трением разрабатывали разные [Показать структуру]		razrabatyvat	PREF	AFFIRM	imperfective	yes	past	yes	ov	3	np	indef	inanim	pl	nomacc
1150	Нужна была прокладка, которая	смягчила	бы трение, помогла бы металлу [Показать структуру]		smjagcat	PREF	AFFIRM	perfective	no	subjunctive	yes	vo	0	np	def	inanim	sg	nomacc
1151	Сначала	предложили	жидкость - чаще всего различные [Показать структуру]		predlagat	PREF	AFFIRM	perfective	no	past	yes	vo	0	np	indef	inanim	sg	nomacc
1152	В первом случае способ обработки	получил	название гидроэкструзии, во втором - [Показать структуру]		polucat	PREF	AFFIRM	perfective	no	past	yes	vo	0	np	def	inanim	sg	nomacc
1153	и сколько еще предстоит сделать,	осваивая	технологию газовой экструзии! [Показать структуру]	subordinate	osvaivat	PREF	AFFIRM	imperfective	yes	nfin	converb	vo	0	np	def	inanim	sg	acc
1154	Он	вызывает	коррозию оборудования, дезактивирует катализаторы и [Показать структуру]		vyzyvat	PREF	AFFIRM	imperfective	yes	present	yes	vo	0	np	def	inanim	sg	acc
1155	Казалось бы, стоит лишь	извлечь	ванадий из нефти, и мы [Показать структуру]		izvlekat	PREF	AFFIRM	perfective	no	nfin	infinitive	vo	0	np	def	inanim	sg	nomacc
1156	ванадиевые соединения концентрируются в остатках,	составляющих	основу мазута, который в топливном [Показать структуру]	subordinate	ostavljat	PREF	AFFIRM	imperfective	yes	present	participle	vo	0	np	def	inanim	sg	acc
1157		Сотни	миллионов тонн мазута сжигают тепловые [Показать структуру]		szigat	PREF	AFFIRM	imperfective	yes	present	yes	ov	3	np	indef	inanim	pl	nomacc
1158	вредного вещества, которая не должна	оказывать	на человека прямого или косвенного [Показать структуру]	subordinate	okazyvat	PREF	NEGAT	imperfective	yes	nfin	dep_infinitive	vo	2	np	indef	inanim	sg	gen
1159	Выбросы столь токсичного вещества	наносят	значительный экономический и социальный ущерб [Показать структуру]		nanosit	PREF	AFFIRM	imperfective	yes	present	yes	vo	1	np	def	inanim	sg	nomacc
1160	в котлах которых сжигается мазут,	устанавливать	принципиально те же золоуловители, что [Показать структуру]		ustanavlivat	PREF	AFFIRM	imperfective	yes	nfin	infinitive	vo	1	np	def	inanim	pl	nomacc
1161	самой крупной по современным понятиям,	сжигающей	топливо с не самой высокой [Показать структуру]	subordinate	szigat	PREF	AFFIRM	imperfective	yes	present	participle	vo	0	np	indef	inanim	sg	nomacc
1162	темпами за короткое время можно	засыпать	целый город. [Показать структуру]		zasypat	PREF	AFFIRM	perfective	no	nfin	infinitive	vo	0	np	indef	inanim	sg	nomacc
1163	котельного агрегата, не в состоянии	взять	на себя столь высокую золовую [Показать структуру]		brat	PREF	AFFIRM	perfective	no	nfin	dep_infinitive	vo	3	np	def	inanim	sg	acc
1164	основе (во всяком случае последняя	дает	еще для них определенный стимул [Показать структуру]		davat	NONPREF	AFFIRM	imperfective	no	present	yes	vo	3	np	def	inanim	sg	nomacc
1165	стран, но они еще не	превзошли	капитализм в экономическом отношении (производительность [Показать структуру]		prevoshodit	PREF	NEGAT	perfective	no	past	yes	vo	0	np	def	inanim	sg	nomacc
1166	капитализма уже не в состоянии	подорвать	мировой социализм военным путем (без [Показать структуру]		podryvat	PREF	AFFIRM	perfective	no	nfin	dep_infinitive	vo	0	np	def	inanim	sg	nomacc
1167	В этих условиях решающее	значение	для судеб прогресса в мире [Показать структуру]		priobretat	PREF	AFFIRM	imperfective	yes	present	yes	ov	5	np	def	inanim	sg	nomacc
1168	важно добиться, чтобы преимущества социализма	выявили	себя в восприимчивости к новым [Показать структуру]		vyjavljat	PREF	AFFIRM	perfective	no	subjunctive	yes	vo	0	refl_pro	def	inanim	pl	acc
1169	тем взаимоотношение "элементов" мирового целого	носит	противоречивый, порой антагонистический характер. [Показать структуру]		nesti	NONPREF	AFFIRM	imperfective	yes	present	yes	vo	0	np	def	inanim	sg	nomacc
1170	Бедствия, которые	переживают	народы развивающихся стран, хорошо известны [Показать структуру]	subordinate	perezivat	PREF	AFFIRM	imperfective	yes	present	yes	ov	0	relative_pro	def	inanim	pl	nomacc
1171	Их устранение	предполагает	преодоление экономической и культурной отсталости [Показать структуру]		predpolagat	PREF	AFFIRM	imperfective	yes	present	yes	vo	0	np	indef	inanim	sg	nomacc
1172	стоящие перед ними, таковы, что	решить	их методами, какими они решались [Показать структуру]		resat	NONPREF	AFFIRM	perfective	no	nfin	infinitive	vo	0	pers_pro	def	inanim	pl	nomacc
1173		Разрывать	этот замкнутый круг приходится в [Показать структуру]		razryvat	PREF	AFFIRM	imperfective	yes	nfin	infinitive	vo	0	np	def	inanim	sg	nomacc
1174	Его принятие было шагом неординарным,	породившим	как наивные ожидания товарного изобилия [Показать структуру]	subordinate	porozdat	PREF	AFFIRM	perfective	no	past	participle	vo	0	np	indef	inanim	pl	nomacc
1175		Что	положительного и какие изъяны выявила [Показать структуру]		vyjavljat	PREF	AFFIRM	perfective	no	past	yes	ov	0	np	indef	inanim	pl	nomacc
1176	до Владивостока и Ашхабада) и	учитывающего	мнение более двух тысяч человек [Показать структуру]	subordinate	ucityvat	PREF	AFFIRM	imperfective	yes	present	participle	vo	0	np	def	inanim	sg	nomacc
1177	вдаваться в крайности и не	возвеличивать	относительно немногочисленные письма граждан, озабоченных [Показать структуру]		vozvelicivat	PREF	NEGAT	imperfective	yes	nfin	infinitive	vo	1	np	indef	inanim	pl	nomacc
1178	Принятие нового закона в общественном сознании	фурора	не произвело. [Показать структуру]		proizvodit	PREF	NEGAT	perfective	no	past	yes	ov	1	np	indef	inanim	sg	gen
1179	населения к содержанию закона, сам	факт	его появления полностью одобрили 73 [Показать структуру]		odobriat	PREF	AFFIRM	perfective	no	past	yes	ov	3	np	def	inanim	sg	nomacc
1180	Заняться индивидуальным трудом	выразили	готовность около 6 % населения [Показать структуру]		vyrazat	PREF	AFFIRM	perfective	no	past	yes	vo	0	np	def	inanim	sg	nomacc
1181	лет, преимущественно инженер, студент, не	имеющий	собственной квартиры и имеющий доход [Показать структуру]	subordinate	imet	NONPREF	NEGAT	imperfective	no	present	participle	vo	0	np	indef	inanim	sg	gen
1182	двух вещах: во-первых, население страны	приняло	индивидуальную и кооперативную (включая семейный [Показать структуру]		prinimat	PREF	AFFIRM	perfective	no	past	yes	vo	0	np	def	inanim	pl	nomacc
1183	Это химические автоколебания,	которые	в честь первых исследователей назвали [Показать структуру]	subordinate	nazyvat	PREF	AFFIRM	perfective	no	past	yes	ov	4	relative_pro	def	inanim	pl	nomacc
1184	химии Башкирского филиала АН СССР	изучали	автоколебательную реакцию окисления сравнительно простого [Показать структуру]		izucat	PREF	AFFIRM	imperfective	yes	past	yes	vo	0	np	def	inanim	sg	acc
1185	раствор, в котором идет окисление,	добавить	очень небольшое количество соли церия [Показать структуру]		dobavljat	PREF	AFFIRM	perfective	no	nfin	infinitive	vo	1	np	indef	inanim	sg	nomacc
1186	Свечение	имеет	характер вспышек, и приборы регистрируют [Показать структуру]		imet	NONPREF	AFFIRM	imperfective	no	present	yes	vo	0	np	def	inanim	sg	nomacc
1187	Химики	обнаружили	интересное явление: если использовать сразу [Показать структуру]		obnaruzyvat	PREF	AFFIRM	perfective	no	past	yes	vo	0	np	indef	inanim	sg	nomacc
1188		Синергизм	хемолюминесценции можно было наблюдать при [Показать структуру]	main	nabludat	PREF	AFFIRM	imperfective	no	nfin	dep_infinitive	ov	3	np	def	inanim	sg	nomacc
1189	фотоны, их общее количество и	определяет	яркость люминесценции. [Показать структуру]		opredeljat	PREF	AFFIRM	imperfective	yes	present	yes	vo	0	np	def	inanim	sg	nomacc
1190	значительной степени связан с надеждой	понять	периодичность сложных биохимических реакций, разгадать [Показать структуру]		ponimat	PREF	AFFIRM	perfective	no	nfin	dep_infinitive	vo	0	np	def	inanim	sg	nomacc
1191	вода при замерзании расширяется, вряд ли	кого	удивишь. [Показать структуру]	main	udivljat	PREF	AFFIRM	perfective	no	present	yes	ov	0	indef_pro	indef	anim	sg	acc
1192	веществ в природе при охлаждении	уменьшают	свой объем. [Показать структуру]		umensat	PREF	AFFIRM	imperfective	yes	present	yes	vo	0	np	def	inanim	sg	nomacc
1193	Замерзающая вода, заключенная в сосуд,	развивает	давление до 200 МПа, то есть [Показать структуру]		razvivat	PREF	AFFIRM	imperfective	yes	present	yes	vo	0	np	def	inanim	sg	nomacc
1194	Сначала, - рассказывает изобретатель, - мы решили	использовать	огромную силу замерзающей воды для [Показать структуру]	main	ispolzovat	PREF	AFFIRM	perfective	no	nfin	dep_infinitive	vo	0	np	def	inanim	sg	acc
1195	в холодильниках работа долгое время	вызывала	затруднения. [Показать структуру]		vyzyvat	PREF	AFFIRM	imperfective	yes	past	yes	vo	0	np	indef	inanim	pl	nomacc
1196	примерзал к стенкам камеры, и	извлечь	его оттуда было довольно трудно [Показать структуру]		izvlekat	PREF	AFFIRM	perfective	no	nfin	dep_infinitive	vo	0	pers_pro	def	inanim	sg	acc
1197	А почему бы не	заставить	лед самого себя выталкивать? [Показать структуру]		zastavljat	PREF	NEGAT	perfective	no	nfin	infinitive	vo	0	np	generic	inanim	sg	nomacc
1198	состоящей из двух секций, с	разделяющей	их мембраной и крышкой, четко [Показать структуру]	subordinate	razdeljat	PREF	AFFIRM	imperfective	yes	present	participle	vo	0	pers_pro	def	inanim	pl	acc
1199	Если	секции	заполнять водой поочередно, каждая последующая [Показать структуру]		zapolnjat	PREF	AFFIRM	imperfective	yes	nfin	infinitive	ov	0	np	def	inanim	pl	nomacc
1200	близнецы остались без молока, он	взял	бидон и отправился за шесть [Показать структуру]		brat	PREF	AFFIRM	perfective	no	past	yes	vo	0	np	indef	inanim	sg	nomacc
1201	работу в санаторий, для которого	строили	столовую, но это ничего не [Показать структуру]		stroit	NONPREF	AFFIRM	imperfective	no	past	yes	vo	0	np	indef	inanim	sg	acc
1202	тот день, когда, выслушав и	выстукав	близнецов, дотошно высмотрев темные пленки [Показать структуру]	subordinate	vystukivat	PREF	AFFIRM	perfective	no	past	participle	vo	0	np	def	anim	pl	acc
1203	когда отозвалось то, что впервые	обнаружило	себя поздней осенью сорок второго [Показать структуру]		obnaruzyvat	PREF	AFFIRM	perfective	no	past	yes	vo	0	refl_pro	def	inanim	sg	acc
1204	возле блиндажа, младший лейтенант Павлов	отхаркнул	на белый иней, присоливший и [Показать структуру]		otharkivat	PREF	AFFIRM	perfective	no	past	yes	vo	9	np	indef	inanim	sg	nomacc
1205	Но цинга	объясняла	алое пятнышко на инее, цинга [Показать структуру]		objasnjat	PREF	AFFIRM	imperfective	yes	past	yes	vo	0	np	indef	inanim	sg	nomacc
1206	полагалось хоть в малой мере	делить	судьбу блокадного Ленинграда, который он [Показать структуру]		delit	NONPREF	AFFIRM	imperfective	no	nfin	dep_infinitive	vo	0	np	def	inanim	sg	acc
1207	"Цинга", -	уговаривал	Павлов себя все последующие дни [Показать структуру]		ugovarivat	PREF	AFFIRM	imperfective	yes	past	yes	vo	1	refl_pro	def	anim	sg	acc
1208	Ради этого младший лейтенант Павлов	скрывал	от себя и от других [Показать структуру]		skryvat	PREF	AFFIRM	imperfective	yes	past	yes	vo	5	np	def	inanim	sg	nomacc
1209	в том, что кристаллические алюмосиликаты,	содержащие	ионы щелочных и щелочноземельных металлов [Показать структуру]	subordinate	soderzat	PREF	AFFIRM	imperfective	no	present	participle	vo	0	np	indef	inanim	pl	nomacc
1210	нефтепродуктов, идут с применением катализаторов,	ускоряющих	протекающие реакции. [Показать структуру]	subordinate	uskorjat	PREF	AFFIRM	imperfective	yes	present	participle	vo	0	np	indef	inanim	pl	nomacc
1211	С их помощью	получают	высокооктановые бензины, искусственное волокно, лаки [Показать структуру]		polucat	PREF	AFFIRM	imperfective	no	present	yes	vo	0	np	indef	inanim	pl	nomacc
1212	Так	назвали	этот минерал за способность вспучиваться [Показать структуру]		nazyvat	PREF	AFFIRM	perfective	no	past	yes	vo	0	np	def	inanim	sg	nomacc
1213	Ученые	имеют	дело главным образом с синтетическими [Показать структуру]		imet	NONPREF	AFFIRM	imperfective	no	present	yes	vo	0	np	indef	inanim	sg	nomacc
1214		Исследовали	, в частности, реакцию скелетной изомеризации углеводов [Показать структуру]		issledovat	PREF	AFFIRM	imperfective	no	past	yes	vo	2	np	def	inanim	sg	acc
1215	элементов (обычно - металл 8-й группы)	выполнял	рабочую (гидродегидрирующую) функцию, а другой [Показать структуру]		vypolnjat	PREF	AFFIRM	imperfective	yes	past	yes	vo	0	np	def	inanim	sg	acc
1216	В качестве носителя мы	использовали	синтетический морденит - цеолит, обладающий повышенной [Показать структуру]		ispolzovat	PREF	AFFIRM	perfective	no	past	yes	vo	0	np	def	inanim	sg	nomacc
1217	в катализе как пористые носители:	их	насыщали активным веществом, собственно катализатором [Показать структуру]		nasyscat	PREF	AFFIRM	imperfective	yes	past	yes	ov	0	pers_pro	def	inanim	pl	acc
1218	лишь их способность впитывать и	удерживать	другие вещества. [Показать структуру]		uderzivat	PREF	AFFIRM	imperfective	yes	nfin	dep_infinitive	vo	0	np	indef	inanim	pl	nomacc
1219	Впрочем, мне	предложили	одно место в машине, отъезжавшей [Показать структуру]		predlagat	PREF	AFFIRM	perfective	no	past	yes	vo	1	np	indef	inanim	sg	nomacc
1220	Потом заколебалась: "	Отправить	Наташу!" - и сразу же: [Показать структуру]	main	otpravljat	PREF	AFFIRM	perfective	no	nfin	infinitive	vo	0	name	def	anim	sg	acc
1221	самого уха и летящими губами	считая	петли. [Показать структуру]	subordinate	scitat	PREF	AFFIRM	imperfective	yes	nfin	converb	vo	0	np	indef	inanim	pl	nomacc
1222	Наташа, та вообще	ничего	не понимала, пела по утрам [Показать структуру]	main	ponimat	PREF	NEGAT	imperfective	yes	past	yes	ov	0	neg_pro	indef	inanim	sg	gen
1223	а тогда мне подчас хотелось	ее	ударить. [Показать структуру]		udarjat	PREF	AFFIRM	perfective	no	nfin	dep_infinitive	ov	0	pers_pro	def	anim	sg	acc
1224	на месте, так было легче -	ничего	не предпринимать. [Показать структуру]		predprinimat	PREF	NEGAT	imperfective	yes	nfin	dep_infinitive	ov	0	neg_pro	indef	inanim	sg	gen
1225	белье и какая-то нежная провинциальность	оплетала	плющом балконы. [Показать структуру]		opletat	PREF	AFFIRM	imperfective	yes	past	yes	vo	1	np	indef	inanim	pl	nomacc
1226	Я	продавала	на барахолке кое-какие вещи и [Показать структуру]		prodavat	PREF	AFFIRM	imperfective	yes	past	yes	vo	2	np	indef	inanim	pl	nomacc
1227	шествовала вперед, уже по утрам	руки	покусывало морозом, плющ побагровел и [Показать структуру]		pokusyvat	PREF	AFFIRM	imperfective	no	past	yes	ov	0	np	def	inanim	pl	nomacc
1228		Выдавали	карточки, заботились о затемнении, мальчишки [Показать структуру]		vydavat	PREF	AFFIRM	imperfective	yes	past	yes	vo	0	np	indef	inanim	pl	nomacc
1229	Секретарю обкома партии Г. Никитину,	курирующему	здравоохранение и административные органы, надо [Показать структуру]	subordinate	kurirovat	NONPREF	AFFIRM	imperfective	no	present	participle	vo	0	np	def	inanim	sg	nomacc
1230	пишет в "Правду" Р. Богданов,	фабрикует	уголовное дело, и пошло - поехало [Показать структуру]		fabrikovat	NONPREF	AFFIRM	imperfective	no	present	yes	vo	0	np	indef	inanim	sg	nomacc
1231	Не заставляет	себя	ждать постановление заместителя прокурора республики [Показать структуру]		zdat	NONPREF	AFFIRM	imperfective	no	nfin	dep_infinitive	ov	0	refl_pro	def	anim	sg	acc
1232	стражей, и Октябрьский народный суд	выносит	приговор: четыре года лишения свободы [Показать структуру]		vynosit	PREF	AFFIRM	imperfective	yes	present	yes	vo	0	np	def	inanim	sg	nomacc
1233	Вышестоящие инстанции	пресекли	беззаконие еще в середине прошлого [Показать структуру]		presekat	PREF	AFFIRM	perfective	no	past	yes	vo	0	np	def	inanim	sg	nomacc
1234	Однако те, кто	благословлял	следствие и суд на разгул [Показать структуру]		blagoslovit	NONPREF	AFFIRM	imperfective	no	past	yes	vo	0	np	def	inanim	sg	nomacc
1235	выпутался из их сетей и	брать	на себя ответственность они не [Показать структуру]		brat	NONPREF	AFFIRM	imperfective	no	nfin	dep_infinitive	vo	2	np	generic	inanim	sg	nomacc
1236	самом высоком партийном аппарате республики"	называет	в письме в "Правду" подобные [Показать структуру]		nazyvat	PREF	AFFIRM	imperfective	yes	present	yes	vo	4	np	indef	inanim	pl	nomacc
1237	к конъюнктуре, пишет он, жестко	карая	за провинности других, покрывают друг [Показать структуру]	subordinate	karat	NONPREF	AFFIRM	imperfective	no	nfin	converb	vo	2	np	indef	anim	pl	acc
1238	И	приводит	примеры их личного обогащения за счет [Показать структуру]		privodit	PREF	AFFIRM	imperfective	yes	present	yes	vo	0	np	indef	inanim	pl	nomacc
1239		Понятие	"экстремизм" практически не упоминали и [Показать структуру]		upominat	PREF	NEGAT	imperfective	no	past	yes	ov	2	np	def	inanim	sg	nomacc
1240	им. М. В. Ломоносова удалось	найти	только три книги, посвященных России [Показать структуру]		nahodit	PREF	AFFIRM	perfective	no	nfin	dep_infinitive	vo	2	np	indef	inanim	pl	nomacc
1241	термина "экстремизм" были вескими причинами,	побуждавшими	ученых воздерживаться от его массового [Показать структуру]	subordinate	pobuzdat	PREF	AFFIRM	imperfective	yes	past	participle	vo	0	np	indef	anim	pl	acc
1242	За это время власти	установили	полный контроль над всеми федеральными [Показать структуру]		ustanavlivat	PREF	AFFIRM	perfective	no	past	yes	vo	0	np	def	inanim	sg	nomacc
1243	однако: чем больше государственная власть	подминала	под себя политическую оппозицию и [Показать структуру]		podminat	PREF	AFFIRM	imperfective	yes	past	yes	vo	2	np	def	inanim	sg	acc
1244	будут собираться вместе лично, чтобы "	поставить	заслон" "экстремизму". [Показать структуру]		stavit	PREF	AFFIRM	perfective	no	nfin	infinitive	vo	0	np	indef	inanim	sg	nomacc
1245	времени задач, что могло бы	предусматривать	возможность завершения ею своей работы [Показать структуру]	subordinate	predusmatrivat	PREF	AFFIRM	imperfective	yes	nfin	dep_infinitive	vo	0	np	def	inanim	sg	nomacc
1246	Никому не пришло в голову	задать	вопрос, откуда такая уверенность в [Показать структуру]	main	zadavat	PREF	AFFIRM	perfective	no	nfin	dep_infinitive	vo	0	np	def	inanim	sg	nomacc
1247	сопровождалась появлением новой отрасли квазинауки,	которую	можно назвать "экстремизмоведение". [Показать структуру]	subordinate	nazyvat	PREF	AFFIRM	perfective	no	nfin	dep_infinitive	ov	1	relative_pro	def	inanim	sg	acc
1248	Высшая аттестационная комиссия	утвердила	десятки диссертаций юристов, социологов, психологов [Показать структуру]		utverzdat	PREF	AFFIRM	perfective	no	past	yes	vo	0	np	indef	inanim	pl	nomacc
1249	обители в Ермолино, в молодости	пережившая	трагедию и тяжелую депрессию из-за [Показать структуру]	subordinate	perezivat	PREF	AFFIRM	perfective	no	past	participle	vo	0	np	indef	inanim	sg	acc
1250	Им задали в школе	написать	за лето сочинение на вольную [Показать структуру]	main	pisat	PREF	AFFIRM	perfective	no	nfin	dep_infinitive	vo	2	np	indef	inanim	sg	nomacc
1251	И написал, что если ты	сделал	уроки и пошел гулять, - тогда [Показать структуру]		delat	PREF	AFFIRM	perfective	no	past	yes	vo	0	np	indef	inanim	pl	nomacc
1252	Михаил Мень	принял	меня, не чинясь, рассказал, что [Показать структуру]		prinimat	PREF	AFFIRM	perfective	no	past	yes	vo	0	pers_pro	def	anim	sg	acc
1253	по вертушке Иосифу с просьбой	меня	принять, потому хотя бы, что поговорить [Показать структуру]		prinimat	PREF	AFFIRM	perfective	no	nfin	dep_infinitive	ov	0	pers_pro	def	anim	sg	acc
1254	Владыка долго	что-то	отвечал в трубку, потом излагал [Показать структуру]	main	otvecat	PREF	AFFIRM	imperfective	no	past	yes	ov	0	indef_pro	indef	inanim	sg	nomacc
1255	Отцу Виталию я	высказал	две просьбы: помочь встретиться с [Показать структуру]		vyskazyvat	PREF	AFFIRM	perfective	no	past	yes	vo	0	np	indef	inanim	pl	nomacc
1256	Виталий сказал: "Я	вас	послушал (хотя у меня не [Показать структуру]		slusat	PREF	AFFIRM	perfective	no	past	yes	ov	0	pers_pro	def	anim	sg	acc
1257	ловко против света, так что мог	видеть	мое лицо, а я видел [Показать структуру]	subordinate	videt	NONPREF	AFFIRM	imperfective	no	nfin	dep_infinitive	vo	0	np	def	inanim	sg	nomacc
1258	со мной тоже не будет,	донес	решение Уткин, послушание же (тяжкое [Показать структуру]		donosit	PREF	AFFIRM	perfective	no	past	yes	vo	0	np	def	inanim	sg	nomacc
1259	Госдума окончательно	приняла	закон о кастрации педофилов. [Показать структуру]		prinimat	PREF	AFFIRM	perfective	no	past	yes	vo	0	np	indef	inanim	sg	nomacc
1260		Его	критикуют за мягкость. [Показать структуру]		kritikovat	NONPREF	AFFIRM	imperfective	no	present	yes	ov	0	pers_pro	def	inanim	sg	acc
1261	Российская Госдума	приняла	накануне в третьем и окончательном [Показать структуру]		prinimat	PREF	AFFIRM	perfective	no	past	yes	vo	6	np	indef	inanim	sg	nomacc
1262	Кроме того, новый документ	допускает	возможность химической кастрации, передает BBC [Показать структуру]		dopuskat	PREF	AFFIRM	imperfective	yes	present	yes	vo	0	np	def	inanim	sg	nomacc
1263	возможность условного осуждения любого лица,	совершившего	доказанное насилие над ребенком младше [Показать структуру]	subordinate	soversat	PREF	AFFIRM	perfective	no	past	participle	vo	0	np	indef	inanim	sg	nomacc
1264	-	Закон	критикуют за мягкость и отсутствие [Показать структуру]		kritikovat	NONPREF	AFFIRM	imperfective	no	present	yes	ov	0	np	def	inanim	sg	nomacc
1265	пожеланий осужденного к нему могут	применить	добровольную химическую кастрацию, сократив тем [Показать структуру]		primenjat	PREF	AFFIRM	perfective	no	nfin	dep_infinitive	vo	0	np	indef	inanim	sg	acc
1266	Принятый законопроект	предполагает	ужесточение возможности условно- досрочного освобождения [Показать структуру]		predpolagat	PREF	AFFIRM	imperfective	yes	present	yes	vo	0	np	indef	inanim	sg	nomacc
1267	за которое уличенное лицо может	получить	10 лет лишения свободы, а [Показать структуру]	subordinate	polucat	PREF	AFFIRM	perfective	no	nfin	dep_infinitive	vo	0	np	def	inanim	pl	acc
1268	же) - итальянский купец и путешественник,	представивший	историю своего путешествия по Азии [Показать структуру]	subordinate	predstavljat	PREF	AFFIRM	perfective	no	past	participle	vo	0	np	def	inanim	sg	acc
1269	Эта книга	оказала	значительное влияние на мореплавателей, картографов [Показать структуру]		okazyvat	PREF	AFFIRM	perfective	no	past	yes	vo	0	np	indef	inanim	sg	nomacc
1270	Они понимали, что эти путешествия	открывают	перед ними новые рынки сбыта [Показать структуру]		otkryvat	PREF	AFFIRM	imperfective	yes	present	yes	vo	2	np	indef	inanim	pl	nomacc
1271	причине два крупных венецианских торговца	предприняли	путешествие в Восточную Азию. [Показать структуру]		predprinimat	PREF	AFFIRM	perfective	no	past	yes	vo	0	np	def	inanim	sg	nomacc
1272	где у их третьего брата,	которого	также звали Марко, был свой [Показать структуру]	subordinate	zvat	NONPREF	AFFIRM	imperfective	no	past	yes	ov	1	relative_pro	def	anim	sg	acc
1273		Проведя	год в Сарай-Бату, братья двинулись [Показать структуру]	subordinate	provodit	PREF	AFFIRM	perfective	no	nfin	converb	vo	0	np	indef	inanim	sg	nomacc
1274	В связи с опасностью военных действий,	которые	вёл хан Берке (брат Батыя [Показать структуру]	subordinate	vesti	NONPREF	AFFIRM	imperfective	no	past	yes	ov	0	relative_pro	def	inanim	pl	nomacc
1275	Бухаре три года и не	имея	возможности вернуться домой, они присоединились [Показать структуру]	subordinate	imet	NONPREF	NEGAT	imperfective	no	nfin	converb	vo	0	np	def	inanim	sg	nomacc
1276	Прежде, чем	давать	советы оппозиции, я хочу очертить [Показать структуру]		davat	NONPREF	AFFIRM	imperfective	no	nfin	infinitive	vo	0	np	indef	inanim	pl	nomacc
1277	Так легче будет понять -	кого	я здесь называю оппозицией и [Показать структуру]	main	nazyvat	PREF	AFFIRM	imperfective	yes	present	yes	ov	2	relative_pro	indef	anim	sg	acc
1278	Эта статистика	упростит	понимание - есть ли резервы, где [Показать структуру]		uproscat	PREF	AFFIRM	perfective	no	present	yes	vo	0	np	def	inanim	sg	nomacc
1279	приходит около 60 % граждан,	имеющих	право голоса. [Показать структуру]	subordinate	imet	NONPREF	AFFIRM	imperfective	no	present	participle	vo	0	np	def	inanim	sg	nomacc
1280	в цифрах - я буду далее	называть	АБСОЛЮТНЫЕ проценты, то есть от [Показать структуру]		nazyvat	PREF	AFFIRM	imperfective	yes	nfin	infinitive	vo	0	np	def	inanim	pl	nomacc
1281	голосовать за партию "Единая Россия",	представляющую	интересы власти. [Показать структуру]	subordinate	predstavljat	PREF	AFFIRM	imperfective	yes	present	participle	vo	0	np	indef	inanim	pl	nomacc
1282		Электорат	этой партии в основной своей [Показать структуру]		sostavljat	PREF	AFFIRM	imperfective	yes	present	yes	ov	6	np	def	inanim	sg	nomacc
1283	15 % - это приверженцы идей,	которые	озвучивает КПРФ. [Показать структуру]	subordinate	ozvucivat	PREF	AFFIRM	imperfective	yes	present	yes	ov	0	relative_pro	def	inanim	pl	nomacc
1284	других партий, её электорат чётко	знает	эти идеи, задачи и голосует [Показать структуру]		znat	NONPREF	AFFIRM	imperfective	no	present	yes	vo	0	np	def	inanim	pl	nomacc
1285	обществе потребность в существовании партии,	отстаивающей	права "униженных и оскорблённых", всегда [Показать структуру]	subordinate	otstaivat	PREF	AFFIRM	imperfective	yes	present	participle	vo	0	np	indef	inanim	pl	nomacc
1286		Приветствую	Вас и сообщаю с сожалением [Показать структуру]		privetstvovat	PREF	AFFIRM	imperfective	no	present	yes	vo	0	pers_pro	def	anim	pl	acc
1287	Если	ее	не найдут - перепишу. [Показать структуру]		nahodit	PREF	NEGAT	perfective	no	future	yes	ov	0	pers_pro	def	anim	sg	gen
1288	Если мои адвокаты	покажут	Вам черновики - Вы удивитесь. [Показать структуру]		pokazyvat	PREF	AFFIRM	perfective	no	future	yes	vo	1	np	def	inanim	pl	nomacc
1289	по модернизации, вопросы логистики, несомненно,	играют	в моем случае первостепенное значение [Показать структуру]		igrat	NONPREF	AFFIRM	imperfective	no	present	yes	vo	3	np	indef	inanim	sg	nomacc
1290	состоит в том, что я,	домыслив	эту модель, статью переписал заново [Показать структуру]	subordinate	domyslivat	PREF	AFFIRM	perfective	no	past	participle	vo	0	np	def	inanim	sg	nomacc
1291	в своих статьях и выступлениях	озвучивает	большое количество разнообразных мыслей по поводу [Показать структуру]		ozvucivat	PREF	AFFIRM	imperfective	yes	present	yes	vo	0	np	indef	inanim	sg	nomacc
1292	либеральная оппозиция могла бы согласиться	реализовать	многое из того, что он [Показать структуру]		realizovyvat	NONPREF	AFFIRM	perfective	no	nfin	dep_infinitive	vo	0	quant	indef	inanim	sg	nomacc
1293	Почему Путин позволяет	забалтывать	собственные предложения? [Показать структуру]	main	zabaltyvat	PREF	AFFIRM	imperfective	yes	nfin	dep_infinitive	vo	0	np	indef	inanim	pl	nomacc
1294	у него очевидно не получается	сделать	то, о чем он пишет [Показать структуру]	main	delat	PREF	AFFIRM	perfective	no	nfin	dep_infinitive	vo	0	dem_pro	def	inanim	sg	nomacc
1295	а Раиса Павловна Кучуганова не	экскурсии	по музею водит, а именно [Показать структуру]		vodit	NONPREF	NEGAT	imperfective	no	present	yes	ov	2	np	indef	inanim	pl	nomacc
1296	Конечно, они нам не	сообщают	чего-то нового; даже если что-то [Показать структуру]	main	soobscat	PREF	NEGAT	imperfective	no	present	yes	vo	0	indef_pro	indef	inanim	sg	gen
1297	речью Раисы Павловны, у кого-то	вышибающей	слезу, кого-то вгоняющей в транс [Показать структуру]	subordinate	vysibat	PREF	AFFIRM	imperfective	yes	present	participle	vo	0	np	indef	inanim	sg	acc
1298	т.д., но, по-моему, нельзя не	увидеть	в этом что-то еще. [Показать структуру]	main	videt	PREF	NEGAT	perfective	no	nfin	dep_infinitive	vo	2	indef_pro	indef	inanim	sg	nomacc
1299	-	Всё	, что рассказываю, сказывали мне удивительно [Показать структуру]	subordinate	rasskazyvat	PREF	AFFIRM	imperfective	yes	present	yes	ov	0	relative_pro	def	inanim	sg	nomacc
1300	Много Бог детей дает, да	лишних	не посылает. [Показать структуру]		posylat	PREF	NEGAT	imperfective	yes	present	yes	ov	0	np	indef	anim	pl	gen
1301		Дитя	дает и долю ему дает [Показать структуру]		davat	NONPREF	AFFIRM	imperfective	no	present	yes	ov	0	np	indef	anim	sg	nomacc
1302	детьми с самого их рождения,	напевали	колыбельные или духовные стихи. [Показать структуру]		napevat	PREF	AFFIRM	imperfective	yes	past	yes	vo	0	np	indef	inanim	pl	nomacc
1303	уже пристраивался к песне и	баюкал	себя сам. [Показать структуру]		bajukat	NONPREF	AFFIRM	imperfective	no	past	yes	vo	0	refl_pro	def	anim	sg	acc
1304		Любит	шанюжка мазанье, а головушка [Показать структуру]		lubit	NONPREF	AFFIRM	imperfective	no	present	yes	vo	1	np	generic	inanim	sg	nomacc
1305	Как	закупать	дорогостоящее оборудование? [Показать структуру]		zakupat	PREF	AFFIRM	imperfective	yes	nfin	infinitive	vo	0	np	indef	inanim	sg	nomacc
1306	импортного научного оборудования в РАН	привлекают	значительное внимание. [Показать структуру]		privkat	PREF	AFFIRM	imperfective	yes	present	yes	vo	0	np	indef	inanim	sg	nomacc
1307	Я	задал	ему вопрос: "Есть такая структура [Показать структуру]		zadavat	PREF	AFFIRM	perfective	no	past	yes	vo	1	np	def	inanim	sg	nomacc
1308	печати появляется информация, что они	закупают	оборудование по завышенным на 30 [Показать структуру]		zakupat	PREF	AFFIRM	imperfective	yes	present	yes	vo	0	np	indef	inanim	sg	nomacc
1309	Не было бы разумным	упразднить	посреднические структуры и выделять деньги [Показать структуру]		uprazdnjat	PREF	AFFIRM	perfective	no	nfin	infinitive	vo	0	np	indef	inanim	pl	nomacc
1310	бы сами обращаться к ним,	оплачивать	их услуги, если не уверены [Показать структуру]		oplacivat	PREF	AFFIRM	imperfective	yes	nfin	dep_infinitive	vo	1	np	indef	inanim	pl	nomacc
1311	вопрос, и мне кажется полезным	изложить	его точку зрения, хотя бы вкратце [Показать структуру]		izlagat	PREF	AFFIRM	perfective	no	nfin	dep_infinitive	vo	1	np	def	inanim	sg	acc
1312	того, что он был вынужден	изучить	критические публикации и схему закупки [Показать структуру]	subordinate	izucat	PREF	AFFIRM	perfective	no	nfin	dep_infinitive	vo	0	np	indef	inanim	pl	nomacc
1313	Алексея Крушельницкого "Пилите, Шура, пилите",	которую	он расценивает как опус, все [Показать структуру]	subordinate	rascenivat	PREF	AFFIRM	imperfective	yes	present	yes	ov	1	relative_pro	def	inanim	sg	acc
1314	в том числе проверки прокуратуры,	показали	беспочвенность обвинений. [Показать структуру]		pokazyvat	PREF	AFFIRM	perfective	no	past	yes	vo	0	np	def	inanim	sg	nomacc
1315	А	занесло	меня туда, ленинградца, студента четвертого [Показать структуру]		zanosit	PREF	AFFIRM	perfective	no	past	yes	vo	0	pers_pro	def	anim	sg	acc
1316	была моя национальность (5-й пункт),	сделать	это не удавалось. [Показать структуру]	main	delat	PREF	AFFIRM	perfective	no	nfin	dep_infinitive	vo	0	dem_pro	def	inanim	sg	nomacc
1317	И тут вдруг	знакомят	меня с заворготделом Воркутинского горкома [Показать структуру]		znakomit	NONPREF	AFFIRM	imperfective	no	present	yes	vo	0	pers_pro	def	anim	sg	acc
1318	Знаю, что мое решение	ее	испугает. [Показать структуру]		pugat	PREF	AFFIRM	perfective	no	future	yes	ov	0	pers_pro	def	anim	sg	acc
1319	1938 году умер, моя бабушка	отбывала	срок в Иркутске, умерла от [Показать структуру]		otbyvat	PREF	AFFIRM	imperfective	yes	past	yes	vo	0	np	indef	inanim	sg	nomacc
1320	Мама, конечно,	знала	имидж, как сейчас говорят, и [Показать структуру]		znat	NONPREF	AFFIRM	imperfective	no	past	yes	vo	0	np	generic	inanim	sg	nomacc
1321	город Воркуту, одно название которого	пугало	многих моих знакомых… [Показать структуру]		pugat	NONPREF	AFFIRM	imperfective	no	past	yes	vo	0	np	indef	anim	pl	acc
1322	мама с отчимом уехали отдыхать,	купил	билет, пол мешка книг о [Показать структуру]		pokupat	NONPREF	AFFIRM	perfective	no	past	yes	vo	0	np	indef	inanim	sg	nomacc
1323	Но когда я	увидел	проводника моего вагона, машущего мне [Показать структуру]		videt	PREF	AFFIRM	perfective	no	past	yes	vo	0	np	def	anim	sg	acc
1324		Встречало	меня замечательное солнечное утро. [Показать структуру]		vstrecat	PREF	AFFIRM	imperfective	yes	past	yes	vo	0	pers_pro	def	anim	sg	acc
1325	Начальное	образование	будущий адмирал получил дома, затем [Показать структуру]		polucat	PREF	AFFIRM	perfective	no	past	yes	ov	2	np	def	inanim	sg	nomacc
1326	Во время обучения в гимназии	имел	плохую успеваемость и, при переводе [Показать структуру]		imet	NONPREF	AFFIRM	imperfective	no	past	yes	vo	0	np	indef	inanim	sg	nomacc
1327	по русскому и французскому языкам	исправил	оценки на тройки, и был [Показать структуру]		ispravljat	PREF	AFFIRM	perfective	no	past	yes	vo	0	np	def	inanim	pl	nomacc
1328	поступил в Морской кадетский корпус,	который	окончил в 1894 году, выдержав [Показать структуру]	subordinate	okancivat	PREF	AFFIRM	perfective	no	past	yes	ov	0	relative_pro	def	inanim	sg	nomacc
1329	хуже с поведением), а сам	получил	одну из денежных премий имени [Показать структуру]		polucat	PREF	AFFIRM	perfective	no	past	yes	vo	0	quant	indef	inanim	sg	acc
1330	морскую обсерваторию, а спустя месяц	его	определили вахтенным офицером на броненосный [Показать структуру]		opredeljat	PREF	AFFIRM	perfective	no	past	yes	ov	0	pers_pro	def	anim	sg	acc
1331	В походах Колчак не только	выполнял	свои служебные обязанности, но и [Показать структуру]		vypolnjat	PREF	NEGAT	imperfective	yes	past	yes	vo	0	np	def	inanim	pl	nomacc
1332	В 1897 году Колчак	подавал	рапорт с просьбой перевести его [Показать структуру]		podavat	PREF	AFFIRM	imperfective	yes	past	yes	vo	0	np	indef	inanim	sg	nomacc
1333	Крейсера" Цывинского Г. Ф. можно	встретить	такой отзыв. [Показать структуру]	main	vstrecat	PREF	AFFIRM	perfective	no	nfin	dep_infinitive	vo	0	np	def	inanim	sg	nomacc
1334	владел прекрасно тремя европейскими языками,	знал	хорошо лоции всех морей, знал [Показать структуру]		znat	NONPREF	AFFIRM	imperfective	no	past	yes	vo	1	np	indef	inanim	pl	nomacc
1335	Одним из вопросов,	которые	мы обсудили, был, конечно же [Показать структуру]	subordinate	obsuzdat	PREF	AFFIRM	perfective	no	past	yes	ov	1	relative_pro	def	inanim	pl	nomacc
1336	Этот вопрос	поставил	меня по-настоящему в тупик. [Показать структуру]		stavit	PREF	AFFIRM	perfective	no	past	yes	vo	0	pers_pro	def	anim	sg	acc
1337	бы сама для себя, и	последствия	этой системы мы переживаем до сих пор [Показать структуру]		perezivat	PREF	AFFIRM	imperfective	yes	present	yes	ov	3	np	def	inanim	pl	nomacc
1338	выживания: сегодня они не могут	обеспечить	своим сотрудникам - крупнейшим ученым, подчас [Показать структуру]	main	obespecivat	PREF	NEGAT	perfective	no	nfin	dep_infinitive	vo	9	np	indef	inanim	pl	gen
1339	Нередко ученый вынужден самостоятельно	пробивать	себе дорогу, не чувствуя за [Показать структуру]	main	probivat	PREF	AFFIRM	imperfective	yes	nfin	dep_infinitive	vo	1	np	indef	inanim	sg	acc
1340	созданные для того, чтобы несколько	смягчить	падение уровня бюджетного финансирования академических [Показать структуру]	subordinate	smjagcat	PREF	AFFIRM	perfective	no	nfin	dep_infinitive	vo	0	np	def	inanim	sg	nomacc
1341	как говорят многие мои коллеги,	имеют	тот же недостаток - большое количество [Показать структуру]		imet	NONPREF	AFFIRM	imperfective	no	present	yes	vo	0	np	def	inanim	sg	nomacc
1342	квалифицированные ученые и управленцы, вынуждены	распылять	свою поддержку по десяткам направлений [Показать структуру]		raspylat	PREF	AFFIRM	imperfective	yes	nfin	dep_infinitive	vo	0	np	def	inanim	sg	acc
1343	условиях значение частных фондов, способных	поддержать	российскую гуманитарную науку, будет неизбежно [Показать структуру]	subordinate	podderzivat	PREF	AFFIRM	perfective	no	nfin	dep_infinitive	vo	0	np	def	inanim	sg	acc
1344	и управляется самими учеными, что	делает	его тем более необычным. [Показать структуру]		delat	NONPREF	AFFIRM	imperfective	no	present	yes	vo	0	pers_pro	def	anim	sg	acc
1345	это десятки миллионов нормальных людей,	имеющих	право на куда более достойную [Показать структуру]	subordinate	imet	NONPREF	AFFIRM	imperfective	no	present	participle	vo	0	np	indef	inanim	sg	nomacc
1346		СМИ	заполнили тексты с заголовками, напоминающими [Показать структуру]		zapolnjat	PREF	AFFIRM	perfective	no	past	yes	vo	0	np	indef	inanim	pl	nomacc
1347		Столыпина	привычно обвиняли в насилии - как [Показать структуру]	main	obvinat	PREF	AFFIRM	imperfective	yes	past	yes	ov	1	name	def	anim	sg	acc
1348	публикациях рассуждали так, словно он	имел	объем власти, по меньшей мере равный объему [Показать структуру]		imet	NONPREF	AFFIRM	imperfective	no	past	yes	vo	0	np	indef	inanim	sg	nomacc
1349	начала Первой мировой войны, и	укорять	Столыпина в недостатке реализма. [Показать структуру]	main	ukorjat	PREF	AFFIRM	imperfective	no	nfin	dep_infinitive	vo	0	name	def	anim	sg	acc
1350	рассуждать об аграрной реформе, которая	вовлекла	в свою сферу десятки миллионов [Показать структуру]		vovlekat	PREF	AFFIRM	perfective	no	past	yes	vo	3	np	indef	inanim	pl	nomacc
1351	Хотелось бы	внести	некоторую ясность в этот сюжет [Показать структуру]	main	vnosit	PREF	AFFIRM	perfective	no	nfin	dep_infinitive	vo	0	np	indef	inanim	sg	acc
1352	Как известно,	общину	по разным причинам поддерживало и [Показать структуру]		podderzivat	PREF	AFFIRM	imperfective	yes	past	yes	ov	3	np	def	inanim	sg	acc
1353	идеальной структурой для того, чтобы	держать	в подчинении десятки миллионов крестьян [Показать структуру]	subordinate	derzat	NONPREF	AFFIRM	imperfective	no	nfin	dep_infinitive	ov	2	np	indef	inanim	pl	nomacc
1354	Владимир Рыжков: "Путин	взял	курс на агрессивное удержание статус-кво [Показать структуру]		brat	PREF	AFFIRM	perfective	no	past	yes	vo	0	np	def	inanim	sg	nomacc
1355	событий после 4 марта и	пригласил	либералов к объединению в одну [Показать структуру]		priglasat	PREF	AFFIRM	perfective	no	past	yes	vo	0	np	def	anim	pl	acc
1356	В 2011-м я	выиграл	Европейский суд, в сентябре решение [Показать структуру]		vyigryvat	PREF	AFFIRM	perfective	no	past	yes	vo	0	np	def	inanim	sg	nomacc
1357	тот же самый судья, который	нас	и закрывал, господин Толчеев, чудесный [Показать структуру]		zakryvat	PREF	AFFIRM	imperfective	yes	past	yes	ov	0	pers_pro	def	anim	pl	acc
1358	Я	его	пытался отвести: "Господин Толчеев! [Показать структуру]		otvodit	PREF	AFFIRM	imperfective	no	nfin	dep_infinitive	ov	0	pers_pro	def	anim	sg	acc
1359	Вы	нас	закрывали, какое вы имеете моральное [Показать структуру]		zakryvat	PREF	AFFIRM	imperfective	yes	past	yes	ov	0	pers_pro	def	anim	pl	acc
1360	Вы можете в пятнадцатидневный срок	обжаловать	мое решение". [Показать структуру]	main	obzalovat	PREF	AFFIRM	perfective	no	nfin	dep_infinitive	vo	0	np	def	inanim	sg	nomacc
1361	И они ведь могут	нас	по новой закрыть. [Показать структуру]		zakryvat	PREF	AFFIRM	perfective	no	nfin	dep_infinitive	ov	2	pers_pro	def	anim	pl	acc
1362	и скажет: "Мы из архива	достали	данные нашей проверки 2007 года [Показать структуру]		dostavat	PREF	AFFIRM	perfective	no	past	yes	vo	0	np	def	inanim	sg	nomacc
1363	Государственных	преступников	возмездие настигает не всегда быстро [Показать структуру]		nastigat	PREF	AFFIRM	imperfective	yes	present	yes	ov	1	np	def	anim	pl	acc
1364	Совещание	заняло	два часа: предложения по "окончательному [Показать структуру]		zanimat	PREF	AFFIRM	perfective	no	past	yes	vo	0	np	indef	inanim	pl	nomacc
1365	лишь о том, обязательно ли	уничтожать	экономичным "Циклоном Б" четвертинки и [Показать структуру]		unictozat	PREF	AFFIRM	imperfective	yes	nfin	dep_infinitive	vo	2	np	def	inanim	pl	nomacc
1366	борьбе, в котором, если не	доводить	его до абсурда, есть здравая [Показать структуру]		dovodit	PREF	NEGAT	imperfective	yes	nfin	dep_infinitive	vo	0	pers_pro	def	anim	sg	acc
1367	Ключевую	роль	в поимке Эйхмана (он жил [Показать структуру]		igrat	PREF	AFFIRM	perfective	no	past	yes	ov	3	np	def	inanim	sg	acc
1368	переживший концлагерь, чья дочка случайно	услышала	хвастливые речи сына Эйхмана. [Показать структуру]		slysat	PREF	AFFIRM	perfective	no	past	yes	vo	0	np	def	inanim	pl	nomacc
1369	Эйхману дадут уйти бывшие однопартийцы,	занявшие	важные посты в судебной системе [Показать структуру]	subordinate	zanimat	PREF	AFFIRM	perfective	no	past	participle	vo	0	np	indef	inanim	pl	nomacc
1370	Он	слил	информацию Моссад, хотя к идее [Показать структуру]		slivat	NONPREF	AFFIRM	perfective	no	past	yes	vo	0	np	def	inanim	sg	acc
1371	друзьям, да и тем подвирал, "	поселив	" слепого еврея для конспирации в [Показать структуру]	subordinate	selit	PREF	AFFIRM	perfective	no	nfin	converb	vo	0	np	indef	anim	sg	acc
1372	Бауэр пытался	привлечь	к суду и автора "Нюрнбергских [Показать структуру]	main	privkat	PREF	AFFIRM	perfective	no	nfin	dep_infinitive	vo	2	np	def	anim	sg	acc
1373	бороться с феноменом лженауки, чтобы	удерживать	его в допустимых рамках. [Показать структуру]		uderzivat	PREF	AFFIRM	imperfective	yes	nfin	dep_infinitive	vo	0	pers_pro	def	anim	sg	acc
1374	Но и	отнимать	деньги у граждан и государства [Показать структуру]	main	otnimat	PREF	AFFIRM	imperfective	yes	nfin	dep_infinitive	vo	0	np	indef	inanim	sg	nomacc
1375	по инициативе В. Л. Гинзбурга	образовавшая	в 1998 г. при своем Президиуме Комиссию по борьбе с лженаукой и фальсификацией научных исследований,	subordinate	obrazovyvat	PREF	AFFIRM	imperfective	no	past	participle	vo	6	np	def	inanim	sg	acc
1376	Комиссия	ставит	своей задачей прекращение бесконтрольного финансирования [Показать структуру]		stavit	NONPREF	AFFIRM	imperfective	no	present	yes	vo	2	np	def	inanim	sg	nomacc
1377	Неудивительно, что граждане,	имеющие	явные "заслуги" в создании лженаучных [Показать структуру]	subordinate	imet	NONPREF	AFFIRM	imperfective	no	present	participle	vo	0	np	indef	inanim	pl	nomacc
1378		Процитируем	ее первые строки: "Знакомясь с [Показать структуру]		citirovat	PREF	AFFIRM	perfective	no	future	yes	vo	1	np	def	inanim	pl	nomacc
1379	изобретателя, странными экспертизами, фантастическими суммами,	которые	он будто бы заработал (или [Показать структуру]	subordinate	zarabatyvat	PREF	AFFIRM	perfective	no	subjunctive	yes	ov	2	relative_pro	def	inanim	pl	nomacc
1380	облико морале" коего неподсудно); что	его	напрасно обвиняют в намерении заработать [Показать структуру]		obvinat	PREF	AFFIRM	imperfective	yes	present	yes	ov	1	pers_pro	def	anim	sg	acc
1381	что борьба с Петриком не	имеет	ничего общего с борьбой "за [Показать структуру]		imet	NONPREF	NEGAT	imperfective	yes	present	yes	vo	0	np	indef	inanim	sg	gen
1382	Мы не будем здесь вновь	излагать	хорошо известные факты этой истории [Показать структуру]	main	izlagat	PREF	AFFIRM	imperfective	yes	nfin	dep_infinitive	vo	1	np	def	inanim	pl	nomacc
1383	Хотя эти вопросы - самые главные,	отложим	их и поговорим о сиюминутном [Показать структуру]		otkladyvat	PREF	AFFIRM	perfective	no	future	yes	vo	0	pers_pro	def	inanim	pl	acc
1384	Когда	меня	выбрали (в 2003 г.), в [Показать структуру]		vybirat	PREF	AFFIRM	perfective	no	past	yes	ov	0	pers_pro	def	anim	sg	acc
1385	Да	простят	меня коллеги, но наши академические [Показать структуру]		proscat	PREF	AFFIRM	perfective	no	future	yes	vo	0	pers_pro	def	anim	sg	acc
1386	Оговорюсь, что многие	сохраняют	ясность мысли и за 80 [Показать структуру]		sohranjat	PREF	AFFIRM	imperfective	yes	present	yes	vo	0	np	def	inanim	sg	nomacc
1387		Что	делать? [Показать структуру]	main	delat	NONPREF	AFFIRM	imperfective	no	nfin	dep_infinitive	ov	0	inter_pro	indef	inanim	sg	nomacc
1388	Да просто	выбирать	молодых (и не видеть в [Показать структуру]	main	vybirat	PREF	AFFIRM	imperfective	no	nfin	dep_infinitive	vo	0	np	indef	anim	pl	acc
1389	старше 65 лет: когда кто-то	переходит	этот рубеж, выбирают нового. [Показать структуру]		perehodit	PREF	AFFIRM	imperfective	no	present	yes	vo	0	np	def	inanim	sg	nomacc
1390	в связи с улучшением уровня жизни этот	возраст	можно было бы повысить, но [Показать структуру]		povysat	PREF	AFFIRM	perfective	no	nfin	dep_infinitive	ov	0	np	def	inanim	sg	nomacc
1391	котором сейчас 50 академиков, это	число	стоит положить около 15, для [Показать структуру]		klast	PREF	AFFIRM	perfective	no	nfin	dep_infinitive	ov	0	np	def	inanim	sg	nomacc
1392	в Москве, 4 февраля, впервые	свела	в "поединке массовости" противников и [Показать структуру]		svodit	PREF	AFFIRM	perfective	no	past	yes	vo	3	np	def	anim	pl	acc
1393	акций, состоявшихся в 20-градусный мороз,	интерес	наблюдателей и комментаторов вызывают антипутинское [Показать структуру]		vyzyvat	PREF	AFFIRM	imperfective	yes	present	yes	ov	2	np	def	inanim	sg	nomacc
1394	Главные	итоги	подводит в понедельник российская пресса [Показать структуру]		podvodit	PREF	AFFIRM	imperfective	yes	present	yes	ov	0	np	def	inanim	pl	nomacc
1395		Митинги	оценивали не по лозунгам и [Показать структуру]		ocenivat	PREF	AFFIRM	imperfective	yes	past	yes	ov	0	np	def	inanim	pl	nomacc
1396	по Москве таковы: Болотная площадь	собрала	36 тысяч участников, Поклонная гора [Показать структуру]		sobirat	PREF	AFFIRM	perfective	no	past	yes	vo	0	quant	indef	anim	pl	nomacc
1397	них было 120 тысяч - такую	цифру	, в частности, озвучил с трибуны Владимир [Показать структуру]		ozvucivat	PREF	AFFIRM	perfective	no	past	yes	ov	2	np	def	inanim	sg	acc
1398	или, напротив, с обещаниями поощрений	согнали	бюджетников. [Показать структуру]		sgonjat	PREF	AFFIRM	perfective	no	past	yes	vo	0	np	generic	anim	pl	acc
1399	тысяч сторонников, но это "состязание"	показало	главный минус: власти не чего [Показать структуру]		pokazyvat	PREF	AFFIRM	perfective	no	past	yes	vo	0	np	def	inanim	sg	nomacc
1400	"Диалог отменяется" - так	назвала	газета свою обзорную статью. [Показать структуру]		nazyvat	PREF	AFFIRM	imperfective	no	past	yes	vo	1	np	def	inanim	sg	acc
1401	Она	интерпретирует	субботние акции следующим образом: на [Показать структуру]		interpretirovat	NONPREF	AFFIRM	imperfective	no	present	yes	vo	0	np	def	inanim	pl	nomacc
1402	Данные телеметрии	подтвердили	раскрытие солнечных батарей аппарата и [Показать структуру]		podtverzdat	PREF	AFFIRM	perfective	no	past	yes	vo	0	np	def	inanim	sg	nomacc
1403	МДУ) "Фобос-Грунта", что позволило бы	сформировать	промежуточную эллиптическую орбиту с апогеем [Показать структуру]	subordinate	formirovat	PREF	AFFIRM	perfective	no	nfin	dep_infinitive	vo	0	np	indef	inanim	sg	acc
1404	включением МДУ аппарат должен был	определить	свое положение в пространстве и [Показать структуру]		opredeljat	PREF	AFFIRM	perfective	no	nfin	dep_infinitive	vo	0	np	def	inanim	sg	nomacc
1405	журналистам, что "Фобос-Грунт" не смог	покинуть	опорную орбиту. [Показать структуру]		pokidat	PREF	NEGAT	perfective	no	nfin	dep_infinitive	vo	0	np	def	inanim	sg	acc
1406	датчики, и умная машина не	дала	команду на включение." [Показать структуру]		davat	NONPREF	NEGAT	perfective	no	past	yes	vo	0	np	def	inanim	sg	acc
1407	надежду и оптимизм, 9 ноября	получить	телеметрию с аппарата не удалось [Показать структуру]		polucat	PREF	AFFIRM	perfective	no	nfin	dep_infinitive	vo	0	np	def	inanim	sg	acc
1408	Проблема со связью возникла из-за того, что основной бортовой радиокомплекс X- диапазона и работающие с ним наземные пункты	не планировалось использовать	при нахождении КА на низкой околоземной орбите.	subordinate	ispolzovat	PREF	NEGAT	perfective	no	nfin	dep_infinitive	ov	0	np	def	inanim	pl	nomacc
1409	На опорной же орбите	передать	команду на борт в X [Показать структуру]	main	peredavat	PREF	AFFIRM	perfective	no	nfin	dep_infinitive	vo	0	np	indef	inanim	sg	acc
1410	с аварийной АМС, нужно было	модернизировать	наземные пункты, в частности расфокусировать антенны [Показать структуру]		modernizirovat	PREF	AFFIRM	perfective	no	nfin	dep_infinitive	vo	0	np	def	inanim	pl	nomacc
1411	состоянии систем аппарата можно было	готовить	повторную попытку старта с низкой [Показать структуру]		gotovit	NONPREF	AFFIRM	imperfective	no	nfin	dep_infinitive	vo	0	np	indef	inanim	sg	acc
1412	механик, астроном, философ и математик,	оказавший	значительное влияние на науку своего [Показать структуру]	subordinate	okazyvat	PREF	AFFIRM	perfective	no	past	participle	vo	0	np	indef	inanim	sg	nomacc
1413	Он первым	использовал	телескоп для наблюдения небесных тел [Показать структуру]		ispolzovat	PREF	AFFIRM	perfective	no	past	yes	vo	0	np	indef	inanim	sg	nomacc
1414	Своими экспериментами он убедительно	опроверг	умозрительную метафизику Аристотеля и заложил [Показать структуру]		oprovergat	PREF	AFFIRM	perfective	no	past	yes	vo	0	np	def	inanim	sg	acc
1415	сторонник гелиоцентрической системы мира, что	привело	Галилея к серьёзному конфликту с [Показать структуру]	subordinate	privodit	PREF	AFFIRM	perfective	no	past	yes	vo	0	name	def	anim	sg	acc
1416	прапрадед Галилея, известный врач, тоже	носивший	имя Галилео, в 1445 году [Показать структуру]	subordinate	nesti	NONPREF	AFFIRM	imperfective	no	past	participle	vo	0	np	def	inanim	sg	nomacc
1417	Микеланджело, который в дальнейшем тоже	приобрел	известность как композитор- лютнист. [Показать структуру]		priobretat	PREF	AFFIRM	perfective	no	past	yes	vo	0	np	def	inanim	sg	nomacc
1418	С ранних лет	мальчика	влекло к искусству; через всю [Показать структуру]		vlec	NONPREF	AFFIRM	imperfective	no	past	yes	ov	0	np	def	anim	sg	acc
1419	По сочинениям Галилея можно	сделать	также вывод о наличии у [Показать структуру]	main	delat	PREF	AFFIRM	perfective	no	nfin	dep_infinitive	vo	1	np	def	inanim	sg	nomacc
1420	Начальное	образование	Галилей получил в расположенном неподалёку [Показать структуру]		polucat	PREF	AFFIRM	perfective	no	past	yes	ov	1	np	def	inanim	sg	nomacc
1421	Он	взвешивал	возможность стать священником, но отец [Показать структуру]		vzvesyvat	PREF	AFFIRM	imperfective	yes	past	yes	vo	0	np	def	inanim	sg	nomacc
1422		Что	делать после 24-го декабря. [Показать структуру]	main	delat	NONPREF	AFFIRM	imperfective	no	nfin	dep_infinitive	ov	0	inter_pro	indef	inanim	sg	nomacc
1423	А то,	что	будет делать Путин, уже не [Показать структуру]	main	delat	NONPREF	AFFIRM	imperfective	no	nfin	dep_infinitive	ov	0	inter_pro	indef	inanim	sg	nomacc
1424	Это единственное, что	имеет	значение. [Показать структуру]		imet	NONPREF	AFFIRM	imperfective	no	present	yes	vo	0	np	indef	inanim	sg	nomacc
1425	в своем торопливом послании предложил	вернуть	выборы губернаторов, облегчить регистрацию политических [Показать структуру]		vozvrascat	PREF	AFFIRM	perfective	no	nfin	dep_infinitive	vo	0	np	def	inanim	pl	nomacc
1426	Каждый народ	заслуживает	то правительство, которое имеет. [Показать структуру]		zasluzivat	PREF	AFFIRM	imperfective	no	present	yes	vo	0	np	def	inanim	sg	nomacc
1427	смысл в том, что политические	реформы	декларирует человек, имя которого в [Показать структуру]		deklarirovat	PREF	AFFIRM	imperfective	no	present	yes	ov	0	np	generic	inanim	pl	nomacc
1428	Он	аварии	на Ленинском проспекте не сумел [Показать структуру]	main	rassledovat	PREF	NEGAT	perfective	no	nfin	dep_infinitive	ov	4	np	def	inanim	sg	gen
1429	Власть будет пытаться	превратить	свое нынешнее моральное поражение в [Показать структуру]	main	prevrascat	PREF	AFFIRM	perfective	no	nfin	dep_infinitive	vo	0	np	def	inanim	sg	nomacc
1430		Натравливать	нациков, ссорить оппозицию между собой [Показать структуру]	main	natravlivat	PREF	AFFIRM	imperfective	yes	nfin	dep_infinitive	vo	0	np	generic	anim	pl	acc
1431	А в том смысле, что	его	всегда должны сопровождать друзья- помощники [Показать структуру]		soprovozdat	PREF	AFFIRM	imperfective	yes	nfin	dep_infinitive	ov	1	pers_pro	def	anim	sg	acc
1432	дни и в понедельник красноярцы	нашли	в почтовых ящиках газету "Гражданин [Показать структуру]		nahodit	PREF	AFFIRM	perfective	no	past	yes	vo	3	np	def	inanim	sg	acc
1433	оснований, поскольку в реальности газета	дискредитирует	Прохорова, как и, впрочем, всех [Показать структуру]	subordinate	diskreditirovat	NONPREF	AFFIRM	imperfective	no	present	yes	vo	0	name	def	anim	sg	acc
1434	за Прохорова" агитирует за него,	предоставляя	слово трем российским "аллергенам" - Ксении [Показать структуру]	subordinate	predostavljat	PREF	AFFIRM	imperfective	no	nfin	converb	vo	0	np	generic	inanim	sg	nomacc
1435	Прохорову	поют	дифирамбы американские баскетболисты (бизнесмен владеет [Показать структуру]		pet	NONPREF	AFFIRM	imperfective	no	present	yes	vo	0	np	generic	inanim	pl	nomacc
1436	социальной ответственности бизнеса, Прохоров эту	ответственность	демонстрирует". [Показать структуру]		demonstrirovat	NONPREF	AFFIRM	imperfective	no	present	yes	ov	0	np	def	inanim	sg	acc
1437	Прохорова выделены следующие моменты: резко	поднять	акцизы на алкоголь и табак [Показать структуру]	main	podnimat	PREF	AFFIRM	perfective	no	nfin	dep_infinitive	vo	0	np	def	inanim	pl	nomacc
1438	прочие, кроме Путина, кандидаты пообещают	улучшить	жизнь аборигенов благодаря внешней поддержке [Показать структуру]		ulucsat	PREF	AFFIRM	perfective	no	nfin	dep_infinitive	vo	0	np	def	inanim	sg	nomacc
1439	В деревнях темные личности	проведут	от имени Зюганова или Прохорова перепись скота [Показать структуру]		provodit	PREF	AFFIRM	perfective	no	future	yes	vo	5	np	def	inanim	sg	nomacc
1440	ни правоохранителей с тем, чтобы	пресечь	распространение и выпуск фальшивок, не [Показать структуру]	subordinate	presekat	PREF	AFFIRM	perfective	no	nfin	dep_infinitive	vo	0	np	def	inanim	sg	nomacc
1441	Красноярске подтвердили, что они не	имеют	отношения к "Гражданину либералу" и [Показать структуру]		imet	NONPREF	NEGAT	imperfective	no	present	yes	vo	0	np	generic	inanim	sg	gen
1442		Это	признают все. [Показать структуру]	main	priznavat	PREF	AFFIRM	imperfective	yes	present	yes	ov	0	dem_pro	def	inanim	sg	nomacc
1443	коррумпированным чиновникам регионов предоставлено право	осуществлять	подбор судебных кадров (мировых и [Показать структуру]		osuscestvljat	PREF	AFFIRM	imperfective	yes	nfin	dep_infinitive	vo	0	np	def	inanim	sg	nomacc
1444	в том же регионе, откуда	его	и выдвинули в судьи. [Показать структуру]		vydvigat	PREF	AFFIRM	perfective	no	past	yes	ov	0	pers_pro	def	anim	sg	acc
1445		Рассматривать	преступные действия должностных лиц, которые [Показать структуру]	main	rassmatrivat	PREF	AFFIRM	imperfective	yes	nfin	dep_infinitive	vo	0	np	indef	inanim	pl	nomacc
1446	А если к этому	добавить	возможность руководства региона координировать работу [Показать структуру]	subordinate	dobavljat	PREF	AFFIRM	perfective	no	nfin	dep_infinitive	vo	0	np	def	inanim	sg	nomacc
1447	федеральных законов и тем самым	всё	отдали на откуп регионам. [Показать структуру]	main	otdavat	PREF	AFFIRM	perfective	no	past	yes	ov	0	all	def	inanim	sg	nomacc
1448	17 января текущего года судья	озвучила	мысль о том, что недоверие [Показать структуру]		ozvucivat	PREF	AFFIRM	perfective	no	past	yes	vo	0	np	def	inanim	sg	nomacc
1449	Д. А. прямо говорил: " Чего греха таить - наши судьи	берут	деньги [Показать структуру]		brat	NONPREF	AFFIRM	imperfective	no	present	yes	vo	0	np	indef	inanim	pl	nomacc
1450	судьи коррумпированы, он, однако, не	применяет	к ним никаких мер воздействия [Показать структуру]		primenjat	PREF	NEGAT	imperfective	no	present	yes	vo	2	np	indef	inanim	pl	gen
1451	не работает и статья УК,	предусматривающая	уголовную ответственность за вынесение заведомо [Показать структуру]	subordinate	predusmatrivat	PREF	AFFIRM	imperfective	yes	present	participle	vo	0	np	indef	inanim	sg	acc
1452	ЮНЕСКО может	признать	Байкал "наследием в опасности", потому что [Показать структуру]	main	priznavat	PREF	AFFIRM	perfective	no	nfin	dep_infinitive	vo	0	name	def	inanim	sg	nomacc
1453	Два года назад - весной 2010-го	меня	угораздило посетить Байкал с делегацией [Показать структуру]	main	posescat	PREF	AFFIRM	perfective	no	nfin	dep_infinitive	vo	0	name	def	inanim	sg	nomacc
1454	№ 1 за подписью Путина	оживляли	Байкальский целлюлозно-бумажный комбинат (БЦБК), а [Показать структуру]		ozivljat	PREF	AFFIRM	imperfective	yes	past	yes	vo	0	np	def	inanim	sg	nomacc
1455	писем и три дня переговоров,	китайцев	на БЦБК так и не пустили [Показать структуру]		puskat	NONPREF	AFFIRM	perfective	no	past	yes	ov	4	np	indef	anim	pl	acc
1456	на полустанок Байкальск- пассажирский и	вижу	низенький полуразваленный перрон. [Показать структуру]		videt	NONPREF	AFFIRM	imperfective	no	present	yes	vo	0	np	indef	inanim	sg	nomacc
1457	что изменилось с тех пор, как Путин разрешил	запустить	комбинат? [Показать структуру]	subordinate	zapuskat	PREF	AFFIRM	perfective	no	nfin	dep_infinitive	vo	0	np	def	inanim	sg	nomacc
1458	грудами пластика - некультурные отдыхающие давно	облюбовали	заросшую гравийную дамбу в 500 [Показать структуру]		obljubovat	PREF	AFFIRM	perfective	no	past	yes	vo	0	np	def	inanim	sg	acc
1459	же степени комбинат должен был	перемолоть	души своих жертв, чтобы для [Показать структуру]		peremalyvat	PREF	AFFIRM	perfective	no	nfin	dep_infinitive	vo	0	np	def	inanim	pl	nomacc
1460	что теперь можно всё, стал	сливать	отходы в старый забитый шламонакопитель [Показать структуру]		slivat	PREF	AFFIRM	imperfective	yes	nfin	dep_infinitive	vo	0	np	def	inanim	pl	nomacc
1461	грязная жижа сползла вниз и	заполонила	главную трассу страны. [Показать структуру]		zapolonjat	PREF	AFFIRM	perfective	no	past	yes	vo	0	np	def	inanim	sg	acc
1462	в данном случае он просто	выдает	желаемое за действительное. [Показать структуру]		vydavat	PREF	AFFIRM	imperfective	yes	present	yes	vo	0	np	def	inanim	sg	nomacc
1463	Даже если	вообразить	себе невообразимое - сохранение Советского Союза [Показать структуру]	subordinate	voobrazat	PREF	AFFIRM	perfective	no	nfin	dep_infinitive	vo	1	np	def	inanim	sg	nomacc
1464	izucat	имели	точно такие же миграционные потоки [Показать структуру]		imet	NONPREF	AFFIRM	imperfective	no	subjunctive	yes	vo	1	np	def	inanim	pl	nomacc
1465	Принципиально это	ситуацию	не могло изменить. [Показать структуру]	main	izmenjat	PREF	NEGAT	perfective	no	nfin	dep_infinitive	ov	1	np	def	inanim	sg	acc
1466	и Центральной Азии все-таки худо-бедно	знали	бы русский язык, который преподавали [Показать структуру]		znat	NONPREF	AFFIRM	imperfective	no	subjunctive	yes	vo	0	np	def	inanim	sg	nomacc
1467	регионах, за исключением Казахстана, практически не	изучают	русский, что создает определенные трудности [Показать структуру]		izucat	PREF	AFFIRM	imperfective	yes	present	yes	vo	0	np	def	inanim	sg	nomacc
1468	были бы внутренние и мигранты	пересекали	бы лишь административные, а не [Показать структуру]		peresekat	PREF	AFFIRM	imperfective	yes	subjunctive	yes	vo	1	np	def	inanim	pl	nomacc
1469	Вероятно, здесь	играет	свою отрицательную роль продолжающаяся на [Показать структуру]		igrat	NONPREF	AFFIRM	imperfective	no	present	yes	vo	0	np	def	inanim	sg	acc
1470	жители северокавказских республик гораздо лучше	знают	русский язык и культуру, чем [Показать структуру]		znat	NONPREF	AFFIRM	imperfective	no	present	yes	vo	0	np	def	inanim	sg	nomacc
1471	Россия	разработает	30-летний план развития ВМФ. [Показать структуру]		razrabatyvat	PREF	AFFIRM	perfective	no	future	yes	vo	0	np	indef	inanim	sg	nomacc
1472	на основе долгосрочной перспективы планирования	создать	основы для сохранения и сбалансированного [Показать структуру]		sozdavat	PREF	AFFIRM	perfective	no	nfin	dep_infinitive	vo	0	np	def	inanim	pl	nomacc
1473	На эти деньги, в частности, планируется	приобрести	сто надводных и подводных кораблей [Показать структуру]		priobretat	PREF	AFFIRM	perfective	no	nfin	dep_infinitive	vo	0	quant	indef	inanim	pl	nomacc
1474	власть эта вместе с собой	обрекала	общество. [Показать структуру]		obrekat	PREF	AFFIRM	imperfective	yes	past	yes	vo	0	np	def	inanim	sg	nomacc
1475	выборов - лозунг игры по правилам,	объединивший	тех, кто надеется получить эти [Показать структуру]	subordinate	objedinjat	PREF	AFFIRM	perfective	no	past	participle	vo	0	dem_pro	def	anim	pl	acc
1476	Тех, кто остро	ощущает	их дефицит не только на [Показать структуру]		oscuscat	PREF	AFFIRM	imperfective	yes	present	yes	vo	1	np	def	inanim	sg	nomacc
1477	для путинской России многолюдность не	заставит	власть признать состоявшиеся парламентские "выборы [Показать структуру]		zastavljat	PREF	NEGAT	perfective	no	future	yes	vo	0	np	def	inanim	sg	nomacc
1478	тем, как ее оппоненты публично	выясняют	отношения относительно формата предвкушаемых переговоров [Показать структуру]		vyjasnjat	PREF	AFFIRM	imperfective	no	present	yes	vo	0	np	generic	inanim	sg	nomacc
1479		Разрешив	митинги и проигнорировав их резолюции [Показать структуру]	subordinate	razresat	PREF	AFFIRM	perfective	no	past	participle	vo	0	np	generic	inanim	pl	nomacc
1480	И вы	нас	не одолеете, потому что возведенная нами [Показать структуру]		odolevat	PREF	NEGAT	perfective	no	present	yes	ov	1	pers_pro	def	anim	pl	acc
1481	потому что оно охраняется российской Конституцией,	дающей	нам монополию на власть. [Показать структуру]	subordinate	davat	NONPREF	AFFIRM	imperfective	no	present	participle	vo	1	np	def	inanim	sg	acc
1482	И	что	сможет этой монополии противопоставить, собираясь [Показать структуру]	main	protivopostavljat	PREF	AFFIRM	perfective	no	nfin	dep_infinitive	ov	2	inter_pro	indef	inanim	sg	nomacc
1483	Его фотографии не	исследуют	визуальность саму по себе, не [Показать структуру]		issledovat	PREF	NEGAT	imperfective	no	present	yes	vo	0	np	def	inanim	sg	nomacc
1484	Через объектив он	ищет	душу человека. [Показать структуру]		iskat	NONPREF	AFFIRM	imperfective	no	present	yes	vo	0	np	def	inanim	sg	acc
1485		Улавливает	ее. [Показать структуру]		ulavlivat	PREF	AFFIRM	imperfective	yes	present	yes	vo	0	pers_pro	def	inanim	sg	acc
1486	и говорят о фотографии - ты	ловишь	мою душу, она ушла на [Показать структуру]		lovit	PREF	AFFIRM	imperfective	no	present	yes	vo	0	np	def	inanim	sg	acc
1487	попадает эта душа, чьи пальцы	вызывают	на свет ее легкое, похожее [Показать структуру]		vyzyvat	PREF	AFFIRM	imperfective	yes	present	yes	vo	3	np	def	inanim	sg	nomacc
1488	такие живые контуры тени, лишь	слагающие	человеческий облик, но несводимые к [Показать структуру]	subordinate	skladyvat	PREF	AFFIRM	imperfective	yes	present	participle	vo	0	np	def	inanim	sg	nomacc
1489	портретах, где он добывал, открывал,	окрылял	взрослое человеческое лицо, находя в [Показать структуру]		okryljat	PREF	AFFIRM	imperfective	no	past	yes	vo	0	np	indef	inanim	sg	nomacc
1490		Пережив	рождение троих детей, он оказался [Показать структуру]	subordinate	perezivat	PREF	AFFIRM	perfective	no	nfin	converb	vo	0	np	def	inanim	sg	nomacc
1491	распорядился им Тот, чью скрытую	работу	по творению Человека фотограф и начал отслеживать своею камерой.	subordinate	otslezivat	PREF	AFFIRM	imperfective	yes	nfin	dep_infinitive	ov	4	np	def	inanim	sg	acc
1492	А я не могу	снимать	представления. [Показать структуру]	main	snimat	PREF	AFFIRM	imperfective	no	nfin	dep_infinitive	vo	0	np	def	inanim	pl	nomacc
1493	Мы	публикуем	статью Григория Явлинского, написанную не [Показать структуру]		publikovat	NONPREF	AFFIRM	imperfective	no	present	yes	vo	0	np	def	inanim	sg	acc
1494		Считаем	ее программной, поэтому печатаем под [Показать структуру]		scitat	PREF	AFFIRM	imperfective	yes	present	yes	vo	0	pers_pro	def	inanim	sg	acc
1495	последнее десятилетие, так и не	создал	современное государство. [Показать структуру]		sozdavat	PREF	NEGAT	perfective	no	past	yes	vo	0	np	def	inanim	sg	nomacc
1496	Социологи	ищут	признаки "оппозиционности", а дело заключается [Показать структуру]		iskat	PREF	AFFIRM	imperfective	no	present	yes	vo	0	np	def	inanim	pl	nomacc
1497	Народ не хочет	совершенствовать	государство, его убедили в том [Показать структуру]	main	soversenstvovat	PREF	NEGAT	imperfective	no	nfin	dep_infinitive	vo	0	np	def	inanim	sg	nomacc
1498	Народ	налаживает	свою жизнь вне государства. [Показать структуру]		nalazivat	PREF	AFFIRM	imperfective	yes	present	yes	vo	0	np	def	inanim	sg	nomacc
1499	"Уходящий" народ,	считая	государство чужим, естественно, и не [Показать структуру]	subordinate	scitat	PREF	AFFIRM	imperfective	yes	nfin	converb	vo	0	np	def	inanim	sg	nomacc
1500	45 % выпускников ВУЗов не	исключают	возможности уехать, а от 18 [Показать структуру]		isklucat	PREF	NEGAT	imperfective	yes	present	yes	vo	0	np	def	inanim	sg	gen
1501	Готовы	покинуть	страну до 30 % предпринимателей [Показать структуру]	main	pokidat	PREF	AFFIRM	perfective	no	nfin	dep_infinitive	vo	0	np	def	inanim	sg	acc
1502	очень хорошо знаем и не	понимаем	первого президента России. [Показать структуру]		ponimat	PREF	NEGAT	imperfective	no	present	yes	vo	0	np	def	anim	sg	acc
1503	И нашему страстному желанию	увидеть	чудо сотворения новой, лучшей жизни [Показать структуру]	main	videt	PREF	AFFIRM	perfective	no	nfin	dep_infinitive	vo	0	np	def	inanim	sg	nomacc
1504	страны на нашей планете не	встретишь	такого упования на чудо, какое [Показать структуру]		vstrecat	PREF	NEGAT	perfective	no	present	yes	vo	0	np	def	inanim	sg	gen
1505	спасла в голодные военные годы -	давала	в день литр молока. [Показать структуру]		davat	NONPREF	AFFIRM	imperfective	no	past	yes	vo	2	np	indef	inanim	sg	nomacc
1506	Оглоблей	его	больше не били, но досталось [Показать структуру]		bit	NONPREF	NEGAT	imperfective	no	past	yes	ov	2	pers_pro	def	anim	sg	acc
1507	высшей номенклатуре, на дух не	переносил	матерщины. [Показать структуру]		perenosit	PREF	NEGAT	imperfective	yes	past	yes	vo	0	np	def	inanim	sg	gen
1508	заниматься спортом или ужинать, - Ельцин	ввел	штраф за каждое нецензурное слово [Показать структуру]		vvodit	PREF	AFFIRM	perfective	no	past	yes	vo	0	np	def	inanim	sg	nomacc
1509	Желающие	рассказать	скабрезный анекдот сразу выкладывали деньги [Показать структуру]	subordinate	rasskazyvat	PREF	AFFIRM	perfective	no	nfin	dep_infinitive	vo	0	np	indef	inanim	sg	nomacc
1510	рассказывал: - Борис Николаевич мог вечером	выпить	литр. [Показать структуру]	main	pit	PREF	AFFIRM	perfective	no	nfin	dep_infinitive	vo	0	np	indef	inanim	sg	nomacc
1511	российско- украинским журналистом Павлом Шереметом,	которого	20 июля взорвали в автомобиле [Показать структуру]	subordinate	vzryvat	PREF	AFFIRM	perfective	no	past	yes	ov	2	relative_pro	def	anim	sg	acc
1512	начал в числе возможных версий	раскручивать	тему "российского следа". [Показать структуру]		raskrucivat	PREF	AFFIRM	imperfective	yes	nfin	dep_infinitive	vo	0	np	def	inanim	sg	acc
1513		Обвиняя	Кремль в продолжении дестабилизации ситуации [Показать структуру]	subordinate	obvinat	PREF	AFFIRM	imperfective	yes	nfin	converb	vo	0	name	def	anim	sg	nomacc
1514	Во-вторых, Кремль, который	получил	лишнюю возможность обвинить "киевскую хунту [Показать структуру]		polucat	PREF	AFFIRM	perfective	no	past	yes	vo	0	np	indef	inanim	sg	acc
1515	И заголовки типа "В Киеве	убивают	журналистов!" могут оживить теряющую остроту [Показать структуру]		ubivat	PREF	AFFIRM	imperfective	yes	present	yes	vo	0	np	indef	anim	pl	acc
1516	украинская оппозиция, которая теперь начнет	обвинять	Порошенко и компанию в развязывании [Показать структуру]	main	obvinat	PREF	AFFIRM	imperfective	yes	nfin	dep_infinitive	vo	0	name	def	anim	sg	nomacc
1517	пропрезидентские силы, которые могут симметрично	обвинить	в причастности к убийству оппозицию [Показать структуру]	subordinate	obvinat	PREF	AFFIRM	perfective	no	nfin	dep_infinitive	vo	4	np	def	anim	sg	acc
1518	Поскольку оппозиции выгодно	обвинить	власть в развязывании террора. [Показать структуру]	subordinate	obvinat	PREF	AFFIRM	perfective	no	nfin	dep_infinitive	vo	0	np	def	anim	sg	nomacc
1519	Дополнительно все стороны	получили	еще и лишнюю пиар- возможность [Показать структуру]		polucat	PREF	AFFIRM	perfective	no	past	yes	vo	2	np	indef	inanim	sg	acc
1520	терактов продаются гораздо лучше, чем	набившие	оскомину разглагольствования о "пути к [Показать структуру]	subordinate	nabivat	PREF	AFFIRM	perfective	no	past	participle	vo	0	np	generic	inanim	sg	acc
1521	око армии: как в России	ловят	спутники- шпионы. [Показать структуру]		lovit	NONPREF	AFFIRM	imperfective	no	present	yes	vo	0	np	generic	inanim	pl	nomacc
1522	В Центре контроля космического пространства	знают	их "поименно". [Показать структуру]		znat	NONPREF	AFFIRM	imperfective	no	present	yes	vo	0	pers_pro	def	anim	pl	acc
1523	Этот	день	мы отмечаем как день единства [Показать структуру]		otmecat	PREF	AFFIRM	imperfective	yes	present	yes	ov	1	np	def	inanim	sg	nomacc
1524	Коллектив "МК"	поздравляет	всех причастных! [Показать структуру]	main	pozdravljat	PREF	AFFIRM	imperfective	no	present	yes	vo	0	all	def	anim	pl	acc
1525	Он внешне неприметен, но его	роль	в обеспечении безопасности страны трудно переоценить [Показать структуру]	main	pereocenivat	PREF	AFFIRM	perfective	no	nfin	dep_infinitive	ov	5	np	def	inanim	sg	nomacc
1526	Информация стекается в вычислительный центр, где в реальном времени отслеживается порядка 15 тысяч космических объектов,	каждый	из которых служащие здесь военные знают в лицо [Показать структуру]	subordinate	znat	NONPREF	AFFIRM	imperfective	no	present	yes	ov	5	each	indef	inanim	sg	nomacc
1527	Если	ее	распечатать, то томами можно будет [Показать структуру]		pecatat	PREF	AFFIRM	perfective	no	nfin	dep_infinitive	ov	0	pers_pro	def	inanim	sg	acc
