# Supplementary material for: Efficient sentence processing significantly affects the position of objects in Russian
Source: publisher site journal article supplement (doi:10.1515/ling-2023-0164), 2025-11-19
Supplement: Supplementary file 2 [file j_ling-2023-0164_suppl_002.xlsx]

## Sheet: result6
object	object translit	object word	object length	distance	order	sentence	verb
,	usad'ba	усадьба	1	0	OV	Если живет хозяин - все в порядке, если управляющий - похуже, а если никого нет, усадьбу растаскивают.	растаскивать
Барыкина	Barykin	Барыкин	1	1	OV	Барыкина иногда называют ``отцом русского регги``.	называть
группу	gruppa	группа	1	0	OV	В 2013 году группу покидает Франческо Боргато и возвращается Стас Павлов.	покидать
которую	kotoryj	который	1	2	OV	Остальные песни поёт Евгения Бахарева, которую мы уже знаем по альбому 2002 г. -- ``Где теперь любовь? ``.	знать
что	chto	что	1	1	OV	Эти затруднения не могут, однако, пошатнуть интуитивизма; о них можно сказать то же, что Паульсен говорит об эволюционизме, отрицая мысль, что психологическое исследование возникновения совести лишает предписания её святости.	говорить
что	chto	что	1	0	OV	Завоевание политической власти и открытая диктатура мало что дают из-за сопротивления сплочённого христианскими идеалами общества.	давать
которые	kotoryj	который	1	0	OV	В Чечне по данным коммунальных служб на 2008 год, которые приводит агентство ``Грозный информ`` обитают до 4 тыс. бездомных собак, представляющих, по мнению главного эпидемиолога республики Усама Бакаева, ``серьёзную угрозу для жителей``.	приводить
Сериал	serial	сериал	1	4	OV	Сериал на своей производственной базе снимает специализирующаяся на этом процессе компания (production company) -- Warner Bros.	снимать
который	kotoryj	который	1	0	OV	``Шапка Мономаха`` -- прибор с кучей проводов, который надевают им на головы и проводят какие-то тесты.	надевать
Виталия	Vitalij	Виталий	1	1	OV	Однако Виталия она интересует только как объект приложения парикмахерского мастерства.	интересовать
что	chto	что	1	1	OV	Идеями противопоставления света и тьмы изобилуют многие оккультные магические символы, но суть у них всё время одна: свет (ян) и тьма (инь) вечно возвращаются, следуя друг за другом, и порождают то, что китайцы называют ``Десятью тысячами вещей``, то есть мир сотворённый.	называть
ничего	nichto	ничто	1	1	OV	Более поздние исторические источники о Предславе ничего не сообщают.	сообщать
Марка	Mark	Марк	1	2	OV	Эдуардо как финансовый директор проекта пытается убедить Марка использовать растущий сайт как площадку для интернет-рекламы, но Марка это не прельщает.	прельщать
которое	kotoryj	который	1	0	OV	Это прямо противоположно мнению, которое исповедует на этот счет большинство руководителей организаций.	исповедовать
Соа	Soa	Соа	1	0	OV	Соа наряжают в красивое платье, сажают в лодку и пускают в плаванье.	наряжать
которые	kotoryj	который	1	1	OV	Теория производит тем большее впечатление, чем проще её предпосылки, чем разнообразнее предметы, которые она связывает, и чем шире область её применения.	связывать
что	chto	что	1	0	OV	Ведь то, что творите вы, не только жестокое дело, это поистине дело сатанинское, за которое подлежите вы огню геенскому в жизни будущей -- загробной и страшному проклятию потомства в жизни настоящей земной.	творить
что	chto	что	1	2	OV	6): ``Не мечите, бисер перед свиньями``, что иносказательно означает: ``не стоит говорить о том, что собеседники не могут ни понять, ни оценить должным образом``.	мочь
которые	kotoryj	который	1	0	OV	Инфузория находит свою добычу, чувствуя наличие химических веществ, которые выделяют скопления бактерий.	выделять
оппозицию	oppozitsija	оппозиция	1	2	OV	Поскольку оппозицию в Сирии поддерживает Запад и Лига арабских государств, у стран оси нет иного выбора, кроме наращивания помощи Асаду.	поддерживать
которые	kotoryj	который	1	1	OV	Суммарные затраты составят 45 млрд рублей, из которых 10 растянуты на 18 лет, и это выгодно как для инвестора (с учётом стоимости земель аэропорта ``Омск-Центральный``, которые он получит), так и для областного бюджета.	получить
Эякулят	ejakuljat	эякулят	1	0	OV	Эякулят получают в посуду, предложенную соответствующим медицинским учреждением.	получать
это	eto	это	1	0	OV	Я всегда это называю ``никодимовским молитвенным настроем``.	называть
Ванечку	Vanechka	Ванечка	1	0	OV	Артёма и Михаила охрана пропускает, а Ванечку убивает офицер.	убивать
мази	maz'	мазь	1	0	OV	По типу дисперсных систем мази подразделяют на гомогенные (сплавы, растворы), суспензионные, эмульсионные и комбинированные; в зависимости от консистентных свойств -- на собственно мази, гели, линименты, пасты.	подразделять
Богомолова	Bogomolov	Богомолов	1	0	OV	Богомолова приводит Сергей Трахименок: ``-- У меня, -- медленно произнес Богомолов -- не было прототипов положительных героев... -- А вот отрицательных -- были... Точнее, был.	приводить
который	kotoryj	который	1	0	OV	Станция эстакадная, на всём её протяжении расположен высокий навес, который поддерживают колонны, расположенные между путями.	поддерживать
что	chto	что	1	1	OV	Она пред тобою``... ``Я сделал много тебе зла, -- сказал он хану, -- но теперь пришел принять от тебя смерть или жизнь, будучи готов на все, что Бог возвестит тебе``.	возвестить
давление	davlenie	давление	1	0	OV	Поскольку в вакуумной технике очень часто давление измеряют просто в миллиметрах, опуская слова ``ртутного столба``, естественный для вакуумщиков переход к мкм (микронам) осуществляется, как правило, тоже без указания ``давления ртутного столба``.	измерять
потомство	potomstvo	потомство	1	0	OV	``Адад потомство храни``; dIM, MU, ŠEŠ или mdIM, MU, ŠEŠ) -- касситский царь Вавилонии, правил приблизительно в 1219 -- 1188 годах до н. э.	хранить
который	kotoryj	который	1	7	OV	Currently, the maximum fine RECO can levy against an agent is $25,000.	мочь
которые	kotoryj	который	1	3	OV	Rafferty released two further albums in the 1990s in what musician Tom Robinson later described as "a major return to form".	описывать
работу	rabota	работа	1	0	OV	For the first time in the last six years the rate of unemployment has dropped below 20%, and there are already 600,000 more people employed than there were a year ago.	иметь
это	eto	это	1	0	OV	Независимые инструкции или инструкции, ставшие независимыми из-за завершения работы инструкций, от которых они зависят, могут выполняться в произвольном порядке, параллельно или одновременно, если это позволяют используемые процессор и операционная система.	позволять
Это	eto	это	1	1	OV	Это чутко фиксируют энциклопедические издания.	фиксировать
ледники	lednik	ледник	1	0	OV	При прохождении ледников существует опасность падения в трещину на леднике, поэтому ледники проходят в связке, организуя страховку друг друга.	проходить
имена	imja	имя	1	0	OV	Вот ведь не были знакомы, а имена помним, как помнит поневоле каждое поколение имена тех вратарей и тех центрфорвардов.	помнить
Это	eto	это	1	0	OV	Это доказывает немного усложненный вариант опыта с разделом долларов.	доказывать
лапу	lapa	лапа	1	3	OV	К тому же одной мутацией лапу в весло не превратишь: и кисть менять надо, и плечевой сустав, и ключицу с лопаткой.	превратить
это	eto	это	1	0	OV	Друзья спрашивали его, зачем он это делает, не лучше ли просто занять четкую критическую позицию.	делать
многое	mnogoe	многое	1	10	OV	Конечно, многое юные читатели, к которым обращается Чудакова, вряд ли заметят, но, скажем, ошибку в цитате из "Мистера Твистера" увидеть должны.	заметить
победителя	pobeditel'	победитель	1	1	OV	Время прохождения дистанции замеряется электронными системами хронометража с точностью до тысячных секунд, победителя зачастую выявляет фотофиниш.	выявлять
яхту	jahta	яхта	1	0	OV	И, конечно же, "как вы яхту назовете, так она и поплывет".	назвать
ситуацию	situatsija	ситуация	1	1	OV	По его словам, ситуацию сегодня диктует спекулятивный интерес, желание поиграть на падающем индексе.	диктовать
Марка	Mark	Марк	1	2	OV	Мне было интересно, что Марка многие молодые воспринимают как революционера, опрокинувшего традицию.	воспринимать
людей	chelovek	человек	1	0	OV	Я людей снимаю как людей.	снимать
это	eto	это	1	0	OV	В течение недели после родов мы ждали результатов анализа - это делают всегда и всем, если есть подозрения.	делать
маму	mama	мама	1	4	OV	И когда маму еще до рождения ребенка прижимают так, что ей некудадеваться, именно ее лишают человеческого достоинства.	прижимать
Христа	Hristos	Христос	1	0	OV	Когда Христа спрашивают о слепорожденном, кто виноват - родители его или он сам, "не согрешил ни он, ни родители его, но это для того, чтобы на нем явились дела Божии".	спрашивать
многое	mnogoe	многое	1	0	OV	Русская дворянская пословица многое объясняет.	объяснять
это	eto	это	1	0	OV	Наблюдаемая картина движений планет в обоих случаях одна и та же, это гарантирует принцип относительности, сформулированный самим Галилеем.	гарантировать
Закон	zakon	закон	1	0	OV	#NAME?	критиковать
Закон	zakon	закон	1	0	OV	Закон критикуют за мягкость и отсутствие определения детской порнографии.	критиковать
это	eto	это	1	1	OV	"Если мы это не введем, мы превратимся в такой большой архив детской порнографии, которую будут здесь хранить все педофилы мира, потому что здесь не преследуют за это", - сказал омбудсмен.	ввести
Бутылку -	butylka	бутылка	1	1	OV	"Бутылку - сдам!" - пообещал я.	сдать
это	eto	это	1	0	OV	Когда Королев принимал свое решение, он всегда объяснял, почему это делает.	делать
все	vse	все	1	0	OV	Не случайно ведь говорят, что Бог все видит, но не сразу скажет.	видеть
космонавтов	kosmonavt	космонавт	1	1	OV	А поэтому космонавтов обязательно спрашивают о том, что необычное они видели во время полетов?	спрашивать
это	eto	это	1	1	OV	Нагрузили машину, поехали, он - в кабине шофера, мимо мелькали деревья, это он помнит точно.	помнить
телевизор	televizor	телевизор	1	0	OV	В то же время, как обнаружили исследователи Yankee Group, в тех домах, где есть доступ в интернет, телевизор смотрят гораздо меньше.	смотреть
Зависимость,	zavisimost'	зависимость	1	4	OV	Зависимость, как правило, замечают родные и близкие интернетомана по изменениям в его поведении, распорядке дня и т. п.	замечать
остальных	ostal'noj	остальной	1	0	OV	А остальных привлекают в основном информационные услуги Сети.	привлекать
политиков	politik	политик	1	0	OV	Как политиков делают радикалами.	делать
это	eto	это	1	0	OV	"Такой комитет должен быть не только инспектирующей, контролирующей организацией, как это делает, например, существующий у нас на Украине комитет по охране природы пишет Я. Дидух, - но и нести ответственность за правильное, оптимальное, экологически грамотное использование природных ресурсов, их распределение между ведомствами и охрану.	делать
Читателя	chitatel'	читатель	1	0	OV	Читателя беспокоит, всесторонне ли проработаны некоторые проекты, всегда ли они согласуются со здравым смыслом.	беспокоить
Сафронова	Safronov	Сафронов	1	1	OV	В ночь Сафронова принудительно выписывают из кардиологического центра, и на другой день пленум горкома освобождает его от работы.	выписывать
детали	detal'	деталь	1	0	OV	На установке МИОМ (магнитной импульсной обработки металлов) детали штампуют с помощью электромагнитного поля.	штамповать
человека	chelovek	человек	1	14	OV	- Лев Николаевич, а разве плохо, если человека на загрузке деталей или на установке их, например в патрон токарного станка, заменит робот!	заменить
роботы	robot	робот	1	0	OV	"Там, мол, деньги на ветер бросать не станут, а роботы делают.	делать
заготовку	zagotovka	заготовка	1	0	OV	Аналогично происходит процесс на прессе: сперва заготовку устанавливают, а потом по ней ударяет молот.	устанавливать
все	vse	все	1	0	OV	Да разве все перечислишь?	перечислить
Порошки	poroshok	порошок	1	0	OV	Порошки используют для создания покрытий с заданными эксплуатационными характеристиками (с помощью этих покрытий, например, восстанавливают изношенные и упрочняют новые детали машин и механизмов).	использовать
социализм	sotsializm	социализм	1	1	OV	Во-вторых, если говорить об отношении основоположников научного социализма к демократии, то почему бы не обратиться к их собственным положениям о демократизме, без которого они социализм не мыслят, да и сами, как говорится, вышли из демократов.	мыслить
это	eto	это	1	0	OV	Однако я бы не стал, как это делают сегодня многие из моих коллег, объяснять застой в исторической науке только влиянием внешних, "объективных" факторов.	делать
застой	zastoj	застой	1	1	OV	От застоя мы отказываемся, застой мы осуждаем, но беда в том, что некоторые "деятели" периода застоя и сегодня сохраняют свое влияние.	осуждать
это	eto	это	1	0	OV	- Сам по себе перестроечный процесс - и это подтверждают итоги XIX партконференции, - в какой бы сфере жизни общества он ни разворачивался, должен состоять из двух частей.	подтверждать
это	eto	это	1	0	OV	- Экспедиции на Марс это подтверждают!	подтверждать
молодежь	molodezh'	молодежь	1	0	OV	Не предавайся иллюзиям - принципиально нового не получишь, а на посту директора сделаешь еще очень многое: молодежь привлечешь, новые проекты сможешь осуществить."	привлечь
грант	grant	грант	1	0	OV	Часто поэтому грант получает не сильнейший, а "назначенный" ученый, от которого науке один вред.	получать
что	chto	что	1	2	OV	Греческий полис возникает как отрицание того, что сами греки называют "восточным деспотизмом".	называть
что	chto	что	1	0	OV	Развитие рынка, широкое вовлечение античного общества в торговлю позволяют гражданам дополнить свои скромные доходы от сельского хозяйства тем, что приносит разделение труда.	приносить
что	chto	что	1	0	OV	Ну, Ганнибал, что скажешь?	сказать
Такой	takoj	такой	1	5	OV	Такой ни с каким другим не спутаешь.	спутать
Что	chto	что	1	1	OV	Что мы знаем о них?	знать
что-то	chto-to	что-то	1	1	OV	Он подходит к Патрику и, бережно взяв за плечо, что-то вкрадчиво говорит ему.	говорить
что	chto	что	1	0	OV	И все же - априори восхищаюсь ими, даже, наверное, люблю их - как все, что любит она.	любить
Кофе	kofe	кофе	1	0	OV	- Кофе пьет! - догадываемся мы - и идем искать своего адвоката, благо тьма кофеен рядом и все на виду.	пить
что-то	chto-to	что-то	1	0	OV	Если вам что-то предлагают по дружбе, дружески, то будьте уверены, что ценник увеличен на 30%, это как минимум.	предлагать
рыбу	ryba	рыба	1	0	OV	В лучшем случае вам на бумажке вида "тут играем, тут не играем, тут рыбу заворачиваем" нарисуют при вас же какие-то цифры.	заворачивать
Грецию	Gretsija	Греция	1	0	OV	То есть Греция Корфу гордится, а Корфу Грецию терпит.	терпеть
Сиртаки	sirtaki	сиртаки	1	1	OV	Сиртаки тут исполняют редко (по заказу туристов), зато охотно танцуют островные танцы… но об этом потом.	исполнять
что	chto	что	1	2	OV	Пуп Мира - что тут еще скажешь?	сказать
русских	russkij	русский	1	1	OV	Поэтому русских пока любят - их тут немного и они смирные.	любить
шею	sheja	шея	1	1	OV	Попробуйте, если не пробовали никогда, главное - шею не сверните.	свернуть
Ширпотреб	shirpotreb	ширпотреб	1	2	OV	Ширпотреб на Остров привозят те же англичане или китайцы.	привозить
что	chto	что	1	0	OV	Собственно, какая разница, что вынесет на берег морской волной?	вынести
что	chto	что	1	1	OV	Я удивился его честности и спросил, что он думает о происхождении этих денег.	думать
кота	kot	кот	1	0	OV	- Я вас не ругаю: я кота хвалю, - пояснил Николай Иванович.	хвалить
профессоров	professor	профессор	1	4	OV	И профессоров после лекций больше не провожают.	провожать
зонтики	zontik	зонтик	1	5	OV	Но зонтики, как и раньше, теряют все.	терять
это	eto	это	1	0	OV	Михаила Алексеевича в тот момент не было в Отделе рукописей, а я - я просто хотел посмотреть, как это сделает Наталья Николаевна.	сделать
что	chto	что	1	1	OV	Они тоже не спали, ведь, что ни говори, трудно уснуть рядом с деканом.	говорить
что	chto	что	1	0	OV	Отступая с боями перед натиском коллег, Михайло отчаянно сопротивлялся и призывал их посмотреть на то, что пишут они сами.	писать
это	eto	это	1	1	OV	Директор говорил: - Нет, нет, нам это не утвердят!	утвердить
кое-что	koe-chto	кое-что	1	0	OV	Но ведь и мы кое-что можем?	мочь
Платова	Platov	Платов	1	3	OV	В 1775-м Платова во главе полка посылают на усмирение последних выступлений пугачевских войск в Воронежской и Казанской губерниях.	посылать
это	eto	это	1	0	OV	Читатели это любят.	любить
" Москву "	Moskva	Москва	1	1	OV	Но вот и ей пришел конец: 21 июля "Москву" покинет последний гость.	покинуть
всех	vse	все	1	0	OV	Помню, как он кричал на нас, когда электричество отключили: "К власти приду, всех расстреляю!"	расстрелять
гостиницу	gostinitsa	гостиница	1	0	OV	- Жалко, конечно, что гостиницу сносят, - признались наши собеседницы.	сносить
Это	eto	это	1	2	OV	Это они и называют "пробками".	называть
кино	kino	кино	1	0	OV	Кто-то читает, кто-то кино смотрит, кто-то переписывается и улыбается.	смотреть
это	eto	это	1	1	OV	- Хотя на самом деле сильно по бюджету страны это не ударит".	ударить
это	eto	это	1	0	OV	Страна опять же это видит.	видеть
педагогов	pedagog	педагог	1	0	OV	С точки зрения экономики педагогов волнует недостаточная заработная плата.	волновать
агентство	agentstvo	агентство	1	0	OV	Бывает даже так, что агентство создают "для своих" и названию не придают особого значения.	создавать
это	eto	это	1	0	OV	Я их начал каталогизировать - как я это делаю с депутатами, потому что иначе они просто исчезают из памяти, и возникают конфликты, кому сколько своего времени я обещал.	делать
это	eto	это	1	0	OV	Декабрь 2011 года - это разрыв шаблона для правящей элиты, которая поняла, что больше обманывать своих граждан так тупо, как они это делают, не получится.	делать
Сбербанк	Sberbank	Сбербанк	1	0	OV	Сбербанк кредитует на срок до 11 лет под 12% годовых в рублях.	кредитовать
, камин	kamin	камин	1	6	OV	Внутреннее пространство дома спланировано так: на первом этаже находятся гараж, кухня, туалет, ванная с сауной; на втором - просторная гостиная с камином, правда, камин, со слов хозяев, они разжигают редко, "и без того в доме жарко"; третий этаж хозяева отвели под гостевые комнаты, мастерскую и зимний сад со складывающимся балконом.	разжигать
страну	strana	страна	1	0	OV	Кипру придется готовиться к выпуску собственных денег, они не будут котироваться на валютном рынке и страну ждут сильная инфляция и резкое снижение уровня жизни.	ждать
штрафы	shtraf	штраф	1	0	OV	Чаще всего штрафы получают за блокировку гонщика на быстром круге и за замену двигателя или коробки передач.	получать
Исключение	iskljuchenie	исключение	1	0	OV	Исключение составляет гонка в Монако, где скорость проезда по пит-лейн ограничена отметкой в 80 км/ч.	составлять
кубок	kubok	кубок	1	0	OV	Также кубок получает представитель команды победителя.	получать
очки	ochko	очко	1	0	OV	Согласно этой системе, очки получают первые 10 гонщиков, за победу начисляется 25 очков.	получать
Экклстоуна	Ekklstoun	Экклстоун	1	3	OV	С тех пор Экклстоуна не без оснований называют "боссом Формулы-1".	называть
Хокни	Hokni	Хокни	1	0	OV	Когда же Хокни обвиняют в том, что он приписывает использование оптики временам, когда художники не могли иметь к ней доступа, автор теории предлагает обратиться к портрету кисти Рафаэля "Папа Лео X с двумя кардиналами" (1518).	обвинять
это	eto	это	1	0	OV	И они это делают весело и нестандартно, вне зависимости от того, идет ли речь о поисках загадочных нейтрино в глубинах Вселенной или о проведении необычного юбилея в Объединенном институте ядерных исследований в г. Дубне, где в 2004 году чествовали детище большого коллектива ученых и инженеров - знаменитый импульсный быстрый реактор ИБР-2.	делать
науку	nauka	наука	1	3	OV	Замечено, что на чистом энтузиазме науку теперь уже не делают.	делать
котлы	kotel	котел	1	1	OV	Например, если в образцах, собранных вокруг электростанции, повышено содержание ванадия, значит, котлы там топят мазутом.	топить
народ	narod	народ	1	1	OV	Но именно в те годы власть и работающие на нее "пиарасты" сейчас народ и окунают.	окунать
журналистов	zhurnalist	журналист	1	3	OV	Вдруг журналистов на ночь глядя вызывают для дачи показаний в дежурную часть полиции.	вызывать
всех	vse	все	1	0	OV	Естественно, всех волнует вопрос, продолжит ли евро свое триумфальное шествие в ближайшие месяцы.	волновать
это	eto	это	1	1	OV	Клиенты банков это прекрасно понимают: например, в Банке Москвы "Итогам" сообщили, что доля рублевых вкладов граждан неуклонно снижается, а валютные депозиты, наоборот, растут.	понимать
Энергию	energija	энергия	1	3	OV	Энергию они чаще всего запасают в процессе теплового движения (именно этим путем образуются богатые энергией частицы для подавляющего большинства промышленно важных химических реакций), но необходимая энергия может приобретаться также и в результате поглощения квантов света (по этому пути идет, например, ряд важных химических превращений в атмосфере Земли).	запасать
кошек	koshka	кошка	1	0	OV	Правда, в некоторых салонах кошек стригут, обездвижив или даже сделав укол.	стричь
все	vse	все	1	0	OV	Они находятся в таком состоянии, что все держат в себе.	держать
Украину	Ukraina	Украина	1	0	OV	И переврали специально, потому что Украину окружают враги-украинофобы.	окружать
чай	chaj	чай	1	1	OV	В листьях чая кофеина может быть даже больше, чем в зернах кофе, но чай только заваривают, а кофе варят.	заваривать
кофе	kofe	кофе	1	0	OV	В листьях чая кофеина может быть даже больше, чем в зернах кофе, но чай только заваривают, а кофе варят.	варить
первые	pervyj	первый	1	0	OV	Он усиливает влияние симпатических нервов и адреналина на сосуды и бронхи и, подобно адреналину, первые суживает, а вторые расширяет.	сужать
вторые	vtoroj	второй	1	0	OV	Он усиливает влияние симпатических нервов и адреналина на сосуды и бронхи и, подобно адреналину, первые суживает, а вторые расширяет.	расширять
иммунитет	immunitet	иммунитет	1	0	OV	Позже выяснилось, что он еще и иммунитет повышает.	повышать
чемпионаты	chempionat	чемпионат	1	0	OV	С 1996 года чемпионаты устраивают раз в два года.	устраивать
результат	rezul'tat	результат	1	0	OV	Дабы исключить случайное везение, результат определяют на основе двух попыток.	определять
все	vse	все	1	0	OV	Но часто остается надежда, что время как-то все сгладит.	сгладить
все	vse	все	1	0	OV	И он все поймет и простит без лишних слов.	понять
Камус	kamus	камус	1	0	OV	Камус делают из натуральных материалов, например из конского волоса или из синтетических волокон.	делать
пшеницу	pshenitsa	пшеница	1	1	OV	При раздельном способе пшеницу сначала косят и оставляют лежать на поле в виде валков.	косить
валки	valok	валок	1	0	OV	Через 2-3 дня валки подбирают и обмолачивают.	подбирать
билет	bilet	билет	1	0	OV	В ответ прозвучал испытанный довод - "билет положишь на стол".	положить
что	chto	что	1	1	OV	#NAME?	иметь
что-то	chto-to	что-то	1	0	OV	Либо египетская сторона что-то скрывает.	скрывать
Что	chto	что	1	0	OV	Что думают об этом родственники?	думать
Что	chto	что	1	0	OV	Что думают о повышении пенсионного возраста в Госдуме.	думать
что	chto	что	1	0	OV	- Вряд ли он сделает все, что обещает, но он хотя бы обещает, - говорят они, относясь к своему кандидату как к синоптику, сулящему хорошую погоду на выходные.	обещать
кого	kto	кто	1	0	OV	- Если я кого убью днем на Бродвее, - шутит он, - то мне и за это ничего не будет.	убить
что	chto	что	1	0	OV	Он говорит, что придется, и тут же забывает, что говорит.	говорить
которого	kotoryj	который	1	2	OV	Это значит, что впервые в Америке за высшую власть борется претендент, которого категорически не интересует политика как таковая.	интересовать
что	chto	что	1	1	OV	По персональному составу правительство Кириенко было слабым и невнятным, многие люди откровенно не понимали, что они делают на своих позициях.	делать
что-то	chto-to	что-то	1	0	OV	Т.е. мы вам что-то пообещаем к неопределенному периоду времени.	пообещать
это	eto	это	1	0	OV	Не могу гарантировать, что в Кремле нет людей, которые это предлагают.	предлагать
которые	kotoryj	который	1	2	OV	Есть какие-то границы в экономической политике, которые он не переступает.	переступать
что	chto	что	1	0	OV	Но пока мы знаем лишь то, что знаем.	знать
что	chto	что	1	0	OV	Возможно, их было гораздо больше, чем каменных, но то, что дает раскоп, то он и дает.	давать
что	chto	что	1	0	OV	В этих орнаментах есть и ритм, и пропорциональное сочетание конфигураций - древний мастер уже умел делать многое из того, что знает и умеет делать современный художник.	знать
которые	kotoryj	который	1	1	OV	Речь идет о так называемых "страшных историях" (я бы назвал их "историями испуга"), которые дети рассказывают друг другу, собравшись в кружок, обычно вечером или ночью.	рассказывать
что	chto	что	1	1	OV	Это настоящий испуг, почти неотличимый от того, что человек испытывает в реальной жизни.	испытывать
который	kotoryj	который	1	1	OV	Нам мало того, что склон Маттерхорна имеет тот вид, который он имеет: нам нужно упомянуть скребок, этот склон обработавший.	иметь
что	chto	что	1	8	OV	Это то, что Роберт Музиль в "Человеке без свойств" называет "бегством" от предмета, который без сравнения его с чем-то совершенно другим как будто ничего и не стоит.	называть
что	chto	что	1	1	OV	Я помню, когда мне было семь-восемь лет, я не мог без ужаса смотреть на воронку в ванне, на то, как непостижимо неумолимым образом уходит вода в какое-то неведомое темное пространство под ванной и вообще подо всем, что мы считаем нашим привычным миром.	считать
это	eto	это	1	0	OV	Смех и одноглазие хотя и идут рядом, но при этом не имеют понятия, зачем они это делают.	делать
что	chto	что	1	1	OV	Мы хотели знать, что она думает о Вирджинии Вульф и о Сильвии Плат.	думать
песню	pesnja	песня	1	0	OV	Он читает, как песню поет.	петь
который	kotoryj	который	1	0	OV	- Он, как мешок с камнями, который тащишь на горбу, а в него все подкладывают и подкладывают камни.	тащить
что	chto	что	1	1	OV	Я спросил Смерчева, что это значит, и он посмотрел на меня с добрейшей улыбкой.	значить
глаз	glaz	глаз	1	0	OV	Темно, хоть глаз выколи.	выколоть
Что	chto	что	1	0	OV	- Что дают? - спросил я у коротконогой тетеньки, только что отошедшей с бидончиком от киоска.	давать
что	chto	что	1	0	OV	#NAME?	сдавать
это	eto	это	1	0	OV	#NAME?	сдавать
пылищу	pylischa	пылища	1	0	OV	- Ты что, - сказал я, - негодяй, бегаешь тут с веником и пылищу поднимаешь?	поднимать
башку	bashka	башка	1	0	OV	Тут, отец, того и гляди, либо задавят, либо башку проломят.	проломить
что	chto	что	1	1	OV	Признаться, я не сразу понял, что это значит.	значить
Что	chto	что	1	0	OV	- Что значит "что"? - сказала она строго.	значить
говно	govno	говно	1	1	OV	Штаны длинные носит, говно не сдает, пищей брезгует, а по-нашему говорит, как мы.	сдавать
говно	govno	говно	1	1	OV	- В длинных штанах ходит, говно не сдает, говорит по-нашему, а читает по-китайскому.	сдавать
Что	chto	что	1	0	OV	#NAME?	значить
которого	kotoryj	который	1	4	OV	Я видел себя и помидороподобным маленьким уродцем, которого сразу же после родов показывают моей матери, и в то же время я увидел себя в детском саду, в президиуме Союза писателей СССР, в мюнхенском биргартене, у китайской башни и даже в гробу, в котором меня несут к могиле, только не разобрал, кто несет.	показывать
Что	chto	что	1	0	OV	#NAME?	значить
Что	chto	что	1	0	OV	#NAME?	значить
все	vse	все	1	0	OV	#NAME?	сработать
что	chto	что	1	1	OV	- Ну вот это, то, что ты держишь в руках.	держать
ротозейство	rotozejstvo	ротозейство	1	0	OV	Еще ротозейство пришьют…	пришить
бумажки	bumazhka	бумажка	1	0	OV	У вас там полный беспорядок, а вы… а вы только бумажки читаете.	читать
Ищенко	Ischenko	Ищенко	1	0	OV	Ищенко найди.	найти
Автомат	avtomat	автомат	1	0	OV	Автомат дай сюда!	дать
Лощинку	loschinka	лощинка	1	0	OV	Лощинку видишь?	видеть
это	eto	это	1	0	OV	Во Франции это делает главный консерватор Лувра, который назначается правительством и несет ответственность за все состояние музейных предметов.	делать
записи	zapis'	запись	1	0	OV	Однако если в деле хранения дневников Прокофьев проявляет вопиющую небрежность, то записи ведет педантично, при первой же возможности восполняя пробелы - "догоняет дневник".	вести
Фитотерапию	fitoterapija	фитотерапия	1	1	OV	Фитотерапию часто относят к народной медицине и на этом основании делают вывод, что это ненаучный метод лечения.	относить
Исключение	iskljuchenie	исключение	1	0	OV	Исключение составят Люксембург, Бельгия и Австрия - в этих странах банковская тайна сохранится.	составить
Швейцарию	Shvejtsarija	Швейцария	1	4	OV	Ведь брюссельские решения формально Швейцарию ни к чему не обязывают - эта страна в Евросоюз не входит.	обязывать
Человека	chelovek	человек	1	0	OV	Человека помещают внутрь большого магнита, где имеется довольно сильное постоянное магнитное поле, ориентированное в большинстве аппаратов вдоль тела пациента.	помещать
пациента	patsient	пациент	1	0	OV	Затем пациента облучают радиоволнами, причем их частоту подстраивают таким образом, чтобы протоны в его теле могли поглотить часть энергии радиоволн и изменить ориентацию своих магнитных полей относительно направления постоянного магнитного поля.	облучать
Это	eto	это	1	0	OV	Это признает и исполняющий обязанности генерального директора Национального ядерного центра Республики Казахстан Шамиль Тухватулин.	признавать
Остров	ostrov	остров	1	0	OV	Остров населяют буряты и русские, причем смешанных браков очень мало.	населять
это	eto	это	1	0	OV	И если человек, получив диплом МГУ, решил повысить квалификацию в Америке, Финляндии или Франции, пусть он это делает.	делать
убытки	ubytok	убыток	1	0	OV	В большинстве случаев все-таки убытки несет не держатель карточки, а банк.	нести
Деньги	den'gi	деньги	1	0	OV	Деньги стоит обналичивать в банкоматах, находящихся в охраняемых помещениях с постоянным видеонаблюдением.	стоить
прах	prah	прах	1	0	OV	А прах развейте над курганом!	развеять
рубли	rubl'	рубль	1	1	OV	В результате снизим инфляцию (банки ведь рубли не печатают), поддержим банковскую систему и заживем как цивилизованные люди.	печатать
литературу	literatura	литература	1	0	OV	Вы теперь литературу полюбите… конечно, попадаются и неважные книги, но ведь учишься все же на лучших.	полюбить
все	vse	все	1	0	OV	Но самое для нее непонятное было то, что она все слышит, слышит весь мир с его запахами и красками, и ни краскам, ни запахам не нужно напрягать голоса, чтобы она услышала их.	слышать
это	eto	это	1	0	OV	В результате был создан прототип, способный взаимодействовать с окружающим миром, включая людей и объекты, так, как это делает человек.	делать
Это	eto	это	1	0	OV	Это знают российские граждане, которые в большей степени начинают хранить деньги в рублях.	знать
Это	eto	это	1	0	OV	Это знают российские предприниматели, которые начинают вкладывать деньги в инвестиции.	знать
Это	eto	это	1	0	OV	Это знают иностранные предприниматели - иностранные инвестиции начинают быстро расти в России.	знать
Руку	ruka	рука	1	2	OV	Руку как-то странно изгибает - наяву так не согнешь - и придерживает.	изгибать
статейки	statejka	статейка	1	0	OV	Сидит в своем кабинетике, ни во что не вмешивается, грызет шоколадку, статейки сочиняет впрок на зиму: "Любит лесной хозяин полакомиться многокостянковыми и покрытосеменными…	сочинять
шубу	shuba	шуба	1	5	OV	Она купила себе третью шубу, пришла на работу и сразу почувствовала, что атмосфера напряженная; это элементарная зависть, и даже непонятно, к чему такие низменные чувства; ведь в конце-то концов, говорит Рузанна, шубу она, если хотите, покупает как бы не себе, а другим, для повышения эстетического уровня пейзажа.	покупать
Вермеера	Vermeer	Вермеер	1	1	OV	Вермеера часто называют Дельфтским Сфинксом - отчасти из-за отсутствия развернутых биографических сведений, отчасти из-за крайне малого количества работ, каждая из которых, по уровню мастерства исполнения и силе эмоционального воздействия, ставит его в ряд величайших художников.	называть
Воду	voda	вода	1	0	OV	Воду ищут не только чтобы ответить на сакраментальный вопрос "Есть ли жизнь на Марсе?".	искать
планету	planeta	планета	1	0	OV	Однако самые последние исследования наметили иной сценарий: согласно этим данным планету ожидает глобальное похолодание.	ожидать
Фотографии	fotografija	фотография	1	0	OV	Фотографии делают осенью, зимой, весной, снова осенью.	делать
всех	vse	все	1	1	OV	При входе в тюрьму категории А всех обязательно обыскивают, там содержится небольшое число заключенных, но на них приходится много работников тюрьмы, значительно лучше оборудована охрана внешних стен.	обыскивать
Телевизор	televizor	телевизор	1	3	OV	"Телевизор я уже не смотрю," - сказал один из них.	смотреть
детективы	detektiv	детектив	1	0	OV	#NAME?	читать
Прозу	proza	проза	1	1	OV	- Прозу я пишу медленно, и уж когда текст наконец получается, он оказывается востребованным.	писать
Всех	vse	все	1	0	OV	Должен срабатывать четкий алгоритм автоматизированной системы госпитализации, а не клич "Всех везите в ближайшую больницу!"	везти
профессионализм	professionalizm	профессионализм	1	1	OV	Современные бунтари с лозунгом "профессионализм не пропьешь" продолжают после некоторого перерыва радовать зрителей и радоваться сами.	пропить
все	vse	все	1	0	OV	Тогда возникли первые разговоры о том, что за Ельцина все решает его окружение.	решать
это	eto	это	1	1	OV	К счастью, их руководство это хорошо понимает.	понимать
слепней	slepen'	слепень	1	1	OV	Кстати, слепней часто путают с оводами, хотя настоящие оводы - это совсем другие мухи, похожие на слепней только по размеру.	путать
дрозофил	drozofila	дрозофила	1	0	OV	Есть у мух и другие полезные свойства: одни опыляют цветочки, другие, как мушка-дрозофила, служат науке (дрозофил используют в экспериментах при разработке лекарств для генетических болезней).	использовать
Зарплату	zarplata	зарплата	1	1	OV	Зарплату не платим, но сохраняем штатную единицу.	платить
открытия	otkrytie	открытие	1	3	OV	С другой стороны, если я правильно понимаю, тайн все меньше, секретов друг от друга тоже меньше, потому что ритмы научных работ таковы, что открытия друг от друга отделяют месяцы.	отделять
науку	nauka	наука	1	2	OV	Я думаю, что науку прежде всего востребует экономика и ее развитие.	востребовать
вопрос	vopros	вопрос	1	1	OV	Тем не менее сейчас в городской администрации никто так вопрос не ставит.	ставить
это	eto	это	1	0	OV	Он это говорит не потому, что он очень вежливый, а потому, что так делают все.	говорить
это	eto	это	1	0	OV	Новые ритмы, новые отношения между людьми, возможность получить одинаковое образование вне зависимости от социального происхождения (хороший диплом - ключ к карьере, идеалом считается хорошо работающий, как это называют на берегах Сены, социальный лифт) - все эти изменения не могли не отразиться на моде.	называть
это	eto	это	1	0	OV	Российский глаз это воспринимает с трудом и удивляется: и это считается знаменитой французской элегантностью?	воспринимать
это	eto	это	1	0	OV	Но психиатр, выслушав его, взвыл от радости и заявил, что это вполне нормально и что он сам это испытывает.	испытывать
это	eto	это	1	0	OV	- Я это чувствую, я экстрасенка…	чувствовать
мытарства	mytarstvo	мытарство	1	0	OV	Душа Семена Петровича сейчас мытарства проходит, терзается, кипит, а этой поганой собачонке хоть бы что!	проходить
Милости	milost'	милость	1	0	OV	- Милости просим, начальничек, - залебезила старушка Анатольевна, подпрыгивая вокруг.	просить
Унылых	unylyj	унылый	1	2	OV	- Унылых я не люблю, - угрюмо сказал он.	любить
это	eto	это	1	3	OV	Если предполагается брать заемные средства под нашу гарантию, то это мы и сами сделаем.	делать
это	eto	это	1	0	OV	Экономить на человеке, как это делает сегодня правительство, - это безумие.	делать
это	eto	это	1	0	OV	Авторы армейской реформы прекрасно это сознают.	сознавать
ЖЕНЩИН	zhenschina	женщина	1	0	OV	ЖЕНЩИН УРАВНЯЮТ.	уровнять
мальчиков	mal'chik	мальчик	1	0	OV	- Игорь Семенович, вы как-то писали, что в России мальчиков воспитывают женщины.	воспитывать
горы	gora	гора	1	2	OV	И горы при этом прочесывают морские пехотинцы!	прочесывать
людей	chelovek	человек	1	0	OV	Естественно, бойцы, подготовленные для решения совсем других задач, несут большие потери, а все контртеррористические операции завершаются по одному сценарию: сначала людей бросают на штурм зданий с засевшими боевиками в лоб, а когда атака захлебывается, подтягивают бронетехнику.	бросать
пирамиду	piramida	пирамида	1	0	OV	И ведь все это было формально в рамках единой структуры, а тут пирамиду собирают из совершенно разных кирпичей - в том смысле, что все они слабо будут стыковаться по части борьбы с терроризмом.	собирать
все	vse	все	1	0	OV	Тогда, еще при Никите, закладывалось это двоемыслие: все все знают, но официально клянутся в верности партии и вождям.	знать
пропитание	propitanie	пропитание	1	0	OV	Ничего, я себе пропитание найду.	найти
Это	eto	это	1	1	OV	#NAME?	понимать
финансирование	finansirovanie	финансирование	1	0	OV	Там предельно все ясно: цель определена, финансирование обеспечивает государство, оно же и контролирует.	обеспечивать
это	eto	это	1	0	OV	Институт зарабатывает на другом, а в Центре все бесплатно, хотя могли бы и брать деньги, как это делают во всем мире.	делать
новости	novost'	новость	1	1	OV	А новости здесь смотрят непременно.	смотреть
газопровод	gazoprovod	газопровод	1	5	OV	В общем, газопровод Грузия, похоже, не продаст.	продать
сына	syn	сын	1	0	OV	Америка - не самая популярная страна среди грузин, может быть, в этом рейтинге она по-прежнему уступает России, и даже Роман Гоциридзе, хранитель западного выбора, признается: после заграничного университета обязательно сына отправлю доучиваться в Россию, которую все равно надо знать.	отправить
УЗИ	uzi	узи	1	0	OV	УЗИ применяют для обследования внутренних органов, а также для исследования структур головного мозга - этот метод носит название эхоэнцефалографии.	применять
Совесть	sovest'	совесть	1	1	OV	Совесть тебе подавай?	подавать
язык	jazyk	язык	1	1	OV	Одна исподтишка язык адвокатам показывает, а вот вразумительное слово из этих накрашенных ротиков клещами не вытащишь.	показывать
кое-что	koe-chto	кое-что	1	2	OV	Впрочем, кое-что государство все-таки подбрасывает - это называется федеральные целевые программы.	подбрасывать
инфляцию	infljatsija	инфляция	1	2	OV	Что же касается инфляции, то опасения министра Кудрина лежат вне финансовых и экономических проблем: если деньги не разбазариваются, не "крутятся" на счетах, а поступают в виде связанных кредитов под конкретные проекты, инфляцию они не раскрутят.	раскрутить
Истину	istina	истина	1	0	OV	Истину несут не писатели или представители власти, ее определяет экранная аудитория".	нести
это	eto	это	1	3	OV	Парикмахеры тоже соревнуются, но спортом это все же не называют.	называть
флаг	flag	флаг	1	0	OV	Ежели машешь им слишком активно, то молча подходит карабинер и флаг отбирает.	отбирать
Ольгу	Ol'ga	Ольга	1	0	OV	Когда скандал с Пылевой был в самом разгаре, метрдотель в нашей астийской гостинице по секрету сообщил мне, что его знакомый полицейский сказал, что, наверное, Ольгу посадят в тюрьму.	сажать
Это	eto	это	1	0	OV	Это знаю не только я со слов самих спортсменов.	знать
Это	eto	это	1	0	OV	Это знает ВАДА - всемирное антидопинговое агентство.	знать
это	eto	это	1	0	OV	А лучше всего это знают фармакологические лаборатории, одно подразделение которых изобретает допинги для спортсменов, другое - методы обнаружения этой самой химии.	знать
ноги	noga	нога	1	0	OV	На что участники Игр сказали, что им экипировка вообще не по нутру (куртки холодные, кроссовки ноги натирают) и они готовы от нее отказаться.	натирать
затмение	zatmenie	затмение	1	0	OV	После Горно-Алтайска затмение увидят еще жители Кызыла, где продолжительность полной фазы составит всего 1 мин. 56 сек. и Солнце будет видно уже у самого горизонта, на заходе.	видеть
Молдавию	Moldavija	Молдавия	1	2	OV	Молдавию уже давно именуют настоящим полигоном отработки кремлевского экономического оружия.	именовать
Запрет	zapret	запрет	1	0	OV	Запрет снимут, когда в Сухуми пойдут на попятную.	снять
Ответ	otvet	ответ	1	0	OV	Ответ дают правовые нормы.	давать
Результаты	rezul'tat	результат	1	0	OV	Результаты систематизирует компьютерная программа, устанавливая "точный" возраст человека.	систематизировать
Это	eto	это	1	1	OV	Это я говорю не в качестве комплимента просто мы знаем, чем те ожидания завершились, вы теперь в Грузии, и это - ваша вторая попытка?	говорить
кое-что	koe-chto	кое-что	1	0	OV	Но в какой-то момент начинаешь понимать, что условия тоже кое-что означают.	означать
пиво	pivo	пиво	1	0	OV	Вы пиво любите?	любить
коньяк	kon'jak	коньяк	1	1	OV	И коньяк не люблю.	любить
Выводы	vyvod	вывод	1	0	OV	Выводы делайте сами, а мы вернемся к разговору за закрытой дверью.	делать
Коньки	konek	конек	1	0	OV	Коньки подбирают в соответствии с температурой, влажностью, осадками, конфигурацией трассы.	подбирать
Проблему	problema	проблема	1	0	OV	Проблему представляет не только строительство сложного трека, но и его обслуживание.	представлять
дартс	darts	дартс	1	0	OV	Так англичане подчеркивают, что дартс - это не просто любимое развлечение американских байкеров, австралийских дальнобойщиков и индийских бизнесменов (дартс любят во всем мире), а древняя английская традиция и серьезный вид спорта.	любить
Сизаль	sizal'	сизаль	1	0	OV	Сизаль получают из листьев агавы.	получать
дротик	drotik	дротик	1	0	OV	При попадании игла дротика раздвигает волокна и входит в мишень, а когда дротик вынимают, отверстие быстро затягивается.	вынимать
" блинчики "	blinchik	блинчик	1	1	OV	Сначала "блинчики" разогревают до 4300С и с помощью предварительного штампа (разогретого примерно до 3500С) превращают в "кастрюли" - предварительные заготовки для автомобильных колес.	разогревать
заготовки	zagotovka	заготовка	1	1	OV	В обычных условиях на это может уйти пара месяцев, но, чтобы не терять время, заготовки искусственно состаривают: выдерживают в печи при температуре 1500-1600C примерно 12-14 часов, после чего медленно охлаждают.	состаривать
Шаблон	shablon	шаблон	1	0	OV	Шаблон шлифуют и протравливают, а затем тщательно изучают в лаборатории на наличие дефектов деформации, термообработки и однородности сплава.	шлифовать
колесо	koleso	колесо	1	0	OV	Затем колесо устанавливают на фрезерный станок с ЧПУ, который и вырезает запрограммированный дизайн.	устанавливать
это	eto	это	1	0	OV	Последний параметр по ГОСТу контролировать необязательно, но мы это делаем, причем наш внутренний стандарт в этом отношении в два раза более жесткий, чем российский ГОСТ.	делать
колесо	koleso	колесо	1	0	OV	После покраски, окончательной проверки и одобрения ОТК колесо упаковывают, а его заводской паспорт будет храниться у нас еще в течение десяти лет.	упаковывать
человека	chelovek	человек	1	1	OV	Однако от переохлаждения человека надежно защищает герметичный гидрокостюм, который не пропускает воду.	защищать
мембрану	membrana	мембрана	1	0	OV	В изолированных моделях мембрану отделяют от окружающей среды специальной камерой (полой или залитой особой жидкостью с низкой теплопроводностью на основе силиконов), а детали редуктора покрывают препятствующим обмерзанию напылением.	отделять
" руду "	ruda	руда	1	1	OV	С 1960-х годов это запрещено по экологическим соображениям, и сейчас даже в Японии "руду" готовят искусственно, закисляя электролитическое железо.	готовить
Печь	pech'	печь	1	0	OV	Печь разжигают, и начинается процесс восстановления.	разжигать
глину	glina	глина	1	0	OV	Пальцем или специальным инструментом глину снимают с лезвия, создавая будущий рисунок хамон - линии закалки.	снимать
Заготовку	zagotovka	заготовка	1	0	OV	Заготовку нагревают до нужной температуры, а затем окунают в закалочную ванну, наполненную водой или слоями воды с маслом.	нагревать
Заготовку	zagotovka	заготовка	1	0	OV	Заготовку опускают в ванну несколько раз.	опускать
Маты	mat	мат	1	0	OV	Маты сворачивают в рулон диаметром 18 см и устанавливают на подставки, а затем перерубают наискосок.	свертывать
колеса	koleso	колесо	1	0	OV	Для этого локомотив ставится на роликовый стенд, где колеса вращают ролики, а сам паровоз остается на месте.	вращать
бороды	boroda	борода	1	0	OV	Мол, кому надо бороды отрежем, а кому и головы.	отрезать
мощность	moschnost'	мощность	1	1	OV	При этом рядовые потребители мощность обычно оценивают цифрами, обозначенными на корпусе.	оценивать
бутылку	butylka	бутылка	1	1	OV	Его, очевидно, подвела система управления: бутылку он поднимает, но потом бросает.	поднимать
потолок	potolok	потолок	1	2	OV	Основная сложность заключалась в правильной ориентации в закрытом помещении - никакие спутниковые системы навигации, помогающие крылатым ракетам попадать в форточку, потолок не "пробивают".	пробивать
препарат	preparat	препарат	1	1	OV	Четыре группы мышей: трем группам даются разные дозы препарата, четвертая - контрольная (им препарат не дают).	давать
модель	model'	модель	1	0	OV	После этого модель притапливают в гипс, совмещая линию разъема с уровнем раствора.	притапливать
" кокон "	kokon	кокон	1	1	OV	При разделении половин готовой гипсовой формы "кокон" разрезают и извлекают пластилин.	разрезать
литник	litnik	литник	1	0	OV	Сам процесс литья прост: половины формы скрепляются струбциной, металл разогревается на газовой плите до образования на его поверхности пленки соломенного цвета и вливается в форму (обычно литник делают со стороны ног фигуры).	делать
кисть	kist'	кисть	1	1	OV	Затем выступающие детали и грани протираются серебрянкой - для этого по ним слегка проводят кистью со следами серебряной краски (кисть предварительно вытирают о салфетку до сухого состояния).	вытирать
это	eto	это	1	0	OV	С теми же интонациями он мог, к примеру, сказать: "Эксперты это подтвердят, зима на российских просторах продолжается не три, а пять месяцев".	подтвердить
многое	mnogoe	многое	1	0	OV	Два триллиона кубометров газа - это многое объясняет.	объяснять
все	vse	все	1	0	OV	Власть, которая уже уверена, что все успеет, тоже может мутировать по-разному - в полном соответствии с мотивацией власти.	успеть
все	vse	все	1	0	OV	Опять все порушат, найдут нового кумира, более грозного, сильного.	порушить
нефть	neft'	нефть	1	1	OV	С Литвой продолжается возня вокруг нефтепровода "Дружба", но, слышал я, нефть исправно гонят танкерами.	гнать
Инвесторов	investor	инвестор	1	0	OV	Инвесторов зовут в Россию осваивать новые месторождения нефти и газа, но при этом разгорается скандал вокруг сахалинского проекта - проблемы возникают у Shell.	звать
все	vse	все	1	0	OV	"Есть коллекционеры, которые просто покупают локомотив и ставят на полку, а есть моделисты, которые все делают своими руками.	делать
это	eto	это	1	0	OV	Аэрографом с коричневой краской можно покрасить новенький, только что с завода, состав в цвета свежей русской грязи, хотя чаще это делают с миниатюрными танками и самолетами.	делать
банки	bank	банк	1	1	OV	Они уверены, что ЦБ в беде банки не бросит.	бросить
янки	janki	янки	1	1	OV	Вне конкуренции в роли источника всех зол США: янки не пинает сегодня только ленивый.	пинать
кризис	krizis	кризис	1	1	OV	И если перелома тенденции не произойдет, то "где-то к зиме" кризис действительно почувствуют на себе все.	почувствовать
работу	rabota	работа	1	0	OV	Некоторые же эксперты вообще предрекают, что работу потеряют миллионы россиян.	терять
вес	ves	вес	1	0	OV	Корешков - парторг, ветеран и его слово тоже вес имеет.	иметь
Дорогу	doroga	дорога	1	1	OV	Дорогу мне переходит… нет, не черный кот, а пятнистая веселая собачка, старожил института Ветерок, который в 1966 году со своим напарником Угольком после трехнедельного полета в самом пекле радиационных поясов Земли вернулся на Землю еле живой.	переходить
это	eto	это	1	0	OV	"В России это воспринимают как легализацию наркотиков, хотя на самом деле легализация - это свободная продажа.	воспринимать
Отчеты	otchet	отчет	1	0	OV	"Отчеты составляет наш бухгалтер, и я от нее не слышал никаких жалоб на эту тему", - сказал "НИ" директор российского центра Amnesty International Сергей Никитин.	составлять
правозащитников	pravozaschitnik	правозащитник	1	1	OV	Но сегодня правозащитников больше беспокоит другое.	беспокоить
всех	vse	все	1	0	OV	- Если решили все уничтожить, то под тем или иным предлогом всех уничтожат, и величина организации не спасает.	уничтожить
кредит	kredit	кредит	1	1	OV	Как быть, если кредит "душит"?	душить
технику	tehnika	техника	1	0	OV	Из одних частей технику выведут за день до парада, из других выведут - непосредственно в день мероприятия.	вывести
Издержки	izderzhka	издержка	1	0	OV	Издержки несет средний класс.	нести
Это	eto	это	1	0	OV	"Это требует колоссальных сил и средств, но, как только мы сможем увидеть преимущества такого подхода на практике, мы озаботимся его внедрением, - говорит Горячева.	требовать
немногих	nemnogie	немногие	1	1	OV	Объем ВВП - величина достаточно абстрактная, немногих сейчас волнует, был в 1990-е годы один год экономического подъема или четыре.	волновать
Сомнения	somnenie	сомнение	1	0	OV	Сомнения вызывает и методика оценок по категориям товаров изолированно: "Есть эффект замещения товаров, он не учитывается".	вызывать
все	vse	все	1	1	OV	Пусть себе там совместно все и решают.	решать
цены	tsena	цена	1	1	OV	А уже на Пасху, когда вернется спрос, цены снова поднимут.	поднять
общество	obschestvo	общество	1	0	OV	Даже в самых экономически развитых странах общество тревожат распространение бедности, качество здравоохранения и образования, недостаточный уровень пенсионного обеспечения.	тревожить
граждан	grazhdanin	гражданин	1	3	OV	А граждан в свою очередь волнует, как государство организует перераспределение национального богатства.	волновать
щебень	scheben'	щебень	1	4	OV	Я щебень никому просто так не даю".	давать
Лекции	lektsija	лекция	1	0	OV	Лекции читают восемь часов в день пять дней в неделю.	читать
голову	golova	голова	1	3	OV	-Но и за то, что их погрешность не зашкаливает за 60%, я голову на отсечение не дам".	дать
Мау	Mau	Мау	1	1	OV	Выводы консультантов Мау не удивляют.	удивлять
Россию	Rossija	Россия	1	0	OV	Непосредственным поводом стало заявление торгпреда США Карлоса Гутьерреса о том, что "Россию ждут проблемы при присоединении к ВТО" в связи с событиями на Кавказе.	ждать
все	vse	все	1	0	OV	Мы будем по ночам работать, последние деньги отдадим и последнюю рубаху сымем, но все сделаем "красиво".	делать
всех	vse	все	1	0	OV	Больше того, он усложняет условия: пусть всех набирают по конкурсу (критерий - чистая "кредитная" история); пусть все претенденты сдают квалификационные экзамены и проходят проверку моральных качеств на "детекторе лжи".	набирать
дробь	drob'	дробь	1	2	OV	С тех пор дробь так и делают.	делать
персонал	personal	персонал	1	0	OV	Так, в национальном нефтяном ведомстве персонал обучают решать во сне свои личные проблемы, которые мешают эффективно работать.	обучать
Паузу	pauza	пауза	1	0	OV	Паузу возьмут только те производители, которые только намеревались открыть здесь свои производства".	брать
Студентов	student	студент	1	0	OV	Студентов переводят в другие вузы или филиалы.	переводить
Кандидатов	kandidat	кандидат	1	0	OV	Кандидатов выдвигают кафедры.	выдвигать
" змс "	zms	змс	1	1	OV	А теперь мы дошли до того, что "змс" дают уже просто за олимпийские - не золотые - медали.	давать
это	eto	это	1	0	OV	И говорить о том, что тому, кто это поддержит, мы дадим налоговые льготы, в принципе неправильно.	поддержать
это	eto	это	1	0	OV	Международная организация труда говорит, что пенсия должна быть не ниже 40 процентов от зарплаты и мы всячески это поддерживаем.	поддерживать
оппозицию	oppozitsija	оппозиция	1	3	OV	На Первый канал оппозицию все равно не пустят, поэтому, конечно, - интернет, конечно, - поездки и встречи с общественными активистами в регионах, конечно, - многочисленная и разнообразная печатная продукция.	пустить
рекорд	rekord	рекорд	1	1	OV	Исходя из соображений безопасности, FAI требует, чтобы нижняя граница высоты раскрытия куполов обязательно составляла 600 метров (если это правило не будет соблюдено, рекорд не признают).	признавать
все	vse	все	1	0	OV	И мы с вами все понимаем, просто живем в неудачное время, когда сказать "нет" - это попасть в список изгоев, маргиналов или просто идиотов.	понимать
Это	eto	это	1	0	OV	Это понимают в СПС, "Яблоке" и КПРФ и не желают терять свою и без того упавшую ниже плинтуса популярность.	понимать
это	eto	это	1	0	OV	Все это понимают.	понимать
воду	voda	вода	1	0	OV	Мне это напоминает анекдот: "Научитесь прыгать с вышки, а потом мы вам воду нальем в бассейн".	налить
Гипс	gips	гипс	1	0	OV	Гипс снимают, клиент уезжает!"	снимать
Путина	Putin	Путин	1	0	OV	Путина любят, как талисман на счастье, как залог УСПЕХА.	любить
сыр	syr	сыр	1	0	OV	Пока сыр подвозят и меняют.	подвозить
все	vse	все	1	0	OV	Да, он "все знает", но упругости среды не чувствует.	знать
документы	dokument	документ	1	1	OV	Если раньше что-то меняли в законах, зачастую набело их переписывая, то теперь последние восемь лет документы просто штампуют.	штамповать
это	eto	это	1	0	OV	- Если дело остановится на 90 или 80 долларов за баррель, то мы это перенесем.	перенести
всех	vse	все	1	0	OV	Тем не менее пока ситуация с переработками, которые не только в России никак не оформляются и не оплачиваются, всех устраивает.	устраивать
все	vse	все	1	0	OV	В действительности все решает зарплата, размер которой несколько выше, чем на рынке, утверждают эксперты ВШЭ.	решать
то	to	то	1	0	OV	Ну, вот, что имеем, то имеем.	иметь
все	vse	все	1	0	OV	Появятся карточки - и народ сразу все вспомнит.	вспомянуть
это	eto	это	1	1	OV	Если мы хотим иметь низкую инфляцию, расходы надо увеличивать процентов на 13-14, а не на 30-40, как мы это ежегодно делаем.	делать
генетиков	genetik	генетик	1	0	OV	Вот уже больше десяти лет генетиков будоражит пример знаменитой овечки Долли - первого млекопитающего, клонированного из клетки взрослого животного.	будоражить
это	eto	это	1	1	OV	В ВТО это прекрасно понимают.	понимать
Работников	rabotnik	работник	1	0	OV	Работников переманивают из одной компании в другую, предлагая огромные деньги - до 150 тысяч рублей в месяц.	переманивать
это	eto	это	1	0	OV	В Париже и Берлине это понимают, и, полагаю, там обойдутся риторикой по российскому вопросу и не пойдут на дальнейшие меры.	понимать
Специалистов	spetsialist	специалист	1	2	OV	Специалистов в России оценивают все дороже.	оценивать
игрушку	igrushka	игрушка	1	6	OV	Для этого игрушку аккуратно, виток к витку, обматывают веревкой, которую резко вытягивают, держа волчок в руке.	обматывать
то	eto	это	1	0	OV	Если же нагрузка растет очень сильно, а потенциал - медленно, то это заставляет задуматься: может быть, нужно сделать что-то, чтобы потенциал рос быстрее.	заставлять
это	eto	это	1	0	OV	Главное, чтобы пункт назначения всегда был в голове и чтобы всегда было понимание того, что ты делаешь и зачем ты это делаешь.	делать
все	vse	все	1	1	OV	Но самое забавное произошло в финале - я, собственно, из-за этого все и рассказываю.	рассказывать
Цены	tsena	цена	1	0	OV	Цены диктуют местные князьки.	диктовать
человека	chelovek	человек	1	0	OV	Если человека выпихивают на пенсию против его воли, часто он начинает болеть и быстро умирает.	выпихивать
все	vse	все	1	0	OV	Теперь думаю, что они прекрасно все понимают, но действуют из своих корыстных интересов.	понимать
халяву	haljava	халява	1	0	OV	Но халяву дайте!	дать
следствие	sledstvie	следствие	1	2	OV	Более следствие ничего не интересует.	интересовать
девочек	devochka	девочка	1	2	OV	"Многие тогда советовали назначать тренерами массажистов - они девочек еще лучше знают", - вспоминает Исаев.	знать
Экономистов	ekonomist	экономист	1	1	OV	Экономистов сегодня готовят даже там, где учат готовить.	готовить
сценарии	stsenarij	сценарий	1	0	OV	- Обычно сижу и звоню всем по телефону или сценарии читаю".	читать
" малышей "	malysh	малыш	1	1	OV	Вот почему "малышей" штрафуют реже.	штрафовать
Тягу	tjaga	тяга	1	0	OV	Тягу обеспечивают два электромотора суммарной мощностью 50 кВт и массой 17 кг каждый, смонтированные непосредственно у ведущих колес.	обеспечивать
Предпочтение	predpochtenie	предпочтение	1	4	OV	Предпочтение в таком случае часто отдают заведомым фаворитам.	отдавать
бал	bal	бал	1	0	OV	Но бал правят молодые - те, кого Утяшева в разговоре с Newsweek назвала "невинными": "О мальчиках не думают, гормоны не играют, менструального цикла нет".	править
это	eto	это	1	0	OV	Если традиционное сознание живет, то это значит: либо сохраняются условия, которые его породили, либо возникли новые условия, которые работают как холодильник для хранения или как теплица для повторного вызревания, казалось бы, зачахших традиционных норм.	значить
дело	delo	дело	1	1	OV	Тогда и до ЧП дело не доведете".	довести
Все	vse	все	1	0	OV	"Все сделаем, доработка для клиентов бесплатна", - попугаем твердит сотрудница.	делать
результаты	rezul'tat	результат	1	0	OV	"Все работают дома, а результаты присылают по электронной почте", - рассказала Ирина Ивановна.	присылать
студента	student	студент	1	1	OV	- И студента не подставишь, ведь подкопаться практически невозможно.	подставить
Фармера	Farmer	Фармер	1	2	OV	Фармера это не убеждает.	убеждать
инвалидов	invalid	инвалид	1	4	OV	"Пандусы ставятся для галочки, инвалидов даже опробовать их не зовут: удобно - не удобно, поставили - и ладно, сойдет", - переживает Зарипов.	звать
Ставки	stavka	ставка	1	0	OV	Ставки формирует рынок, значит, пойти на их снижение себе в ущерб банки не могут.	формировать
это	eto	это	1	0	OV	Те, кто это говорит, не понимают, что прока от этого не будет.	говорить
речь	rech'	речь	1	1	OV	И чаще всего речь здесь ведут о математическом, гуманитарном, естественно-научном направлениях.	вести
техникум	tehnikum	техникум	1	1	OV	#NAME?	прировнять
медаль	medal'	медаль	1	0	OV	"Еще хоккеисты медаль возьмут, и задание выполнено, - пошутил сотрудник штаба.	брать
все	vse	все	1	1	OV	- Их там 23 человека, вот сразу все и заклеим".	заклеить
Дениса	Denis	Денис	1	2	OV	Дениса тут же хватает в охапку, как плюшевую игрушку, какая-то пышногрудая канадка.	хватать
плечи	plecho	плечо	1	0	OV	Улыбнитесь этой радости, расслабьте мышцы, плечи опустите, расслабьте мышцы лица, но улыбка пусть останется внутри Вас.	опустить
костры	koster	костер	1	0	OV	Вызывает начальство: они у тебя костры жгут!	жечь
ребенка	rebenok	ребенок	1	1	OV	Когда ребенка чему-то учат, взрослая активность первоначально равна единице, а детская - нулю.	учить
контент	kontent	контент	1	0	OV	- Поскольку к распространенным технологиям web 2.0, когда контент находят и создают сами пользователи, добавляется следующая важнейшая фаза - пользовательская же экспертиза качества: люди и генерируют слова, и проявляют к ним свое отношение.	находить
профессоров	professor	профессор	1	0	OV	В лучшем случае успехи в ней могли принести скромный достаток и благополучие - в благополучной стране, где профессоров ценят.	ценить
семью	sem'ja	семья	1	1	OV	Так ведь славой семью не прокормишь, а чтобы открытия приносили счастье, вероятно, нужно быть не потребителем, а творцом.	прокормить
математику	matematika	математика	1	0	OV	А поскольку личный опыт Перельмана был совсем иным, судьба чаще сталкивала его с теми, кто математику любит больше, чем деньги, славу и другие бонусы, видимо, он, и правда, почувствовал в поведении коллег нечто неприродное математическому сообществу.	любить
тоннели	tonnel'	тоннель	1	0	OV	- Ну, хорошо, хочешь, я тебе тоннели покажу? - спрашивает наконец Мариам и сворачивает с одной ничем не примечательной улицы, застроенной обычными городскими многоэтажками, на другую точно такую же.	показать
историю	istorija	история	1	0	OV	И в какой-то момент я поняла, что когда историю записываешь, чтобы не забыть, то в следующий раз к тебе идея приходит намного более интересная.	записывать
свалку	svalka	свалка	1	0	OV	Внизу свалку продолжает центральная кровать, составленная из четырех обычных и застеленная общим гигантским пледом.	продолжать
Историю	istorija	история	1	0	OV	"Историю пишут победители", а глобальный проект под названием "Нанотехнологии", в значительной мере определяющий лицо (и финансирование) современной науки, пробили физики.	писать
исключение	iskljuchenie	исключение	1	0	OV	Книга написана простым языком, почти не отличающимся от современного; исключение представляют только старые формы творительного падежа.	представлять
Жестянки,	zhestjanka	жестянка	1	6	OV	Жестянки, для лучшего их сбережения, окрашивают снаружи масляною краскою, чтобы предохранить их от ржавчины.	окрашивать
Листы	list	лист	1	1	OV	Листы вторично очищают слабою кислотою и кладут их потом в чистую воду.	очищать
Планеры	planer	планер	1	1	OV	Планеры часто запускают, используя стационарную лебедку, установленную на тяжелой технике.	запускать
пилотов	pilot	пилот	1	0	OV	Так как при таком запуске есть риск разрыва троса, пилотов учат, как вести себя в такой ситуации.	учить
негров	negr	негр	1	0	OV	У меня сложилось впечатление, что возражения оппонентов были в основном двух типов: "нет слов, одни эмоции" и (как назвал это один блогер) "а у вас негров линчуют".	линчевать
негров	negr	негр	1	0	OV	А негров линчуют, во-первых, в Америке (от внимания бдительных читателей не ускользнуло, что письмо написано эмигрантом), а во-вторых, "в этой вашей науке".	линчевать
Композицию	kompozitsija	композиция	1	1	OV	Композицию образно называют поэзией шахмат, поскольку она отражает практику шахматной игры так, как искусство реальную жизнь.	называть
Россию	Rossija	Россия	1	7	OV	Россию в данных организациях от синхронного плавания России представляют: Вице-президент ФСПР И. П. Карташов и 3-кратная Олимпийская чемпионка, Председатель комиссии спортсменов ОКР О. А. Брусникина.	представлять
участие	uchastie	участие	1	2	OV	Сегодня регулярными международными соревнованиями являются "Принцесса Волги" (Самара), "Жемчужина Югры" (Сургут), проводятся также открытые Чемпионаты и Кубки России, участие в которых принимают команды - представители братских республик СНГ и дальнего зарубежья.	принимать
это	eto	это	1	1	OV	А дальше это просто снимаете в темной комнате на фотокамеру.	снимать
это	eto	это	1	1	OV	Стандартная методика, которую сейчас часто используют в большинстве, наверное, экспериментов по изучению быстропротекающих процессов (по-английски она называется "pump-probe technique", по-русски это часто переводят как "накачка и зондирование"), выглядит так: у вас есть, скажем, импульс света, который вы расщепляете на два коротких импульса света, сдвигаете их относительно друг друга на считанны…	переводить
Картинку	kartinka	картинка	1	2	OV	Картинку здесь не показываю, просто рассказываю, что там наблюдалось.	показывать
Кору	kora	кора	1	0	OV	Кору копают вручную с двухметровой глубины, чтобы затем обсыпать ею бескрайние плантации клубники - главной сельхозкультуры Байкальска и окрестных дач.	копать
Байкальск	Bajkal'sk	Байкальск	1	1	OV	Зато Байкальск усиленно ремонтируют за госсчет, меж домами сверкают новенькие детские площадки буржуйского вида.	ремонтировать
Это	eto	это	1	0	OV	Это признают все.	признавать
это	eto	это	1	2	OV	Семен был талантливым программистом: чуть позже, в конце 80-х, он написал компьютерную программу банка "МЕНАТЕП" (это уж не приплетут, надеюсь, к его нынешним винам), и денег у него хватало.	приплести
власть	vlast'	власть	1	0	OV	Поставлена задача уничтожить это логово либерализма, оно и будет раздавлено, если только не заступятся разумные люди повыше: власть уважают в Ивановской епархии.	уважать
Дитя	ditja	дитя	1	0	OV	Дитя дает и долю ему дает.	давать
долю	dolja	доля	1	1	OV	Дитя дает и долю ему дает.	давать
Ананьевну	Anan'evna	Ананьевна	1	0	OV	Походила она, другая будет, третья, снова очередь доброй Ивановны подойдет, и она скажет мужу: "Ваньша ты, Ваньша, давай Ананьевну возьмем, пошто она одна мыкается-то?"	брать
железо	zhelezo	железо	1	0	OV	Ну вот, не дай Бог, попалась стропотливая (вредная) жена, то говорили: как же он с ней будет, железо уваришь, а злой жены не уговоришь.	уварить
пирожок	pirozhok	пирожок	1	0	OV	И стала я их привечать: то пирожок дам, то поговорю.	дать
человека	chelovek	человек	1	0	OV	Где человека осуждают - вставай и уходи.	осуждать
досаду	dosada	досада	1	0	OV	Если обида - надо сократиться (смириться) и помнить: лишнее слово досаду приносит.	приносить
это	eto	это	1	0	OV	А Путин опубликовал статью, где вместо политической реформы предлагает, как я это формулирую: "усовершенствовать процесс подачи челобитных".	формулировать
это	eto	это	1	0	OV	Он это воспримет как проплаченную западными НКО попытку палатки поставить.	воспринять
всё -	vse	все	1	2	OV	Нужно открыто сказать и о проблеме нестабильности и взрывоопасности Северного Кавказа, продекларировав при этом необходимость инвестиций непосредственно в создание производств (рабочих мест) в ЭТОМ РЕГИОНЕ, а не отстёгивание денег местным властям в виде дани (всё-равно распилят).	распилить
все	vse	все	1	0	OV	Надо было строить, а мерзлота все разрушает.	разрушать
кое-что	koe-chto	кое-что	1	0	OV	Но и юбилейные тексты, словно написанные по тезисам лекций по истории КПСС, прослушанных будущими демократическими публицистами в 1970-х, кое-что добавляют к анамнезу современного российского общества.	добавлять
страну	strana	страна	1	1	OV	Учреждение форм правления, заведомо с ней не совместимых, ни к чему хорошему страну не приведет.	привести
лицо	litso	лицо	1	0	OV	В Восточной Швейцарии на Новый год юноши рядятся в женские платья, лицо закрывают деревянными масками и ходят от дома к дому, требуя угощения.	закрывать
Предметы	predmet	предмет	1	1	OV	Предметы учащиеся проходят так называемыми эпохами, когда в течение 3-4 недель ежедневно на первых уроках занимаются одной и той же дисциплиной.	проходить
все	vse	все	1	0	OV	Но Борис Абрамович-то всегда был убежден, что он все предвидит и просчитывает правильно, и новый проект обязательно удастся.	предвидеть
агрессию	agressija	агрессия	1	0	OV	У них (самцов) в период размножения агрессию вызывает соперник, приближающийся к границам участка.	вызывать
Путина	Putin	Путин	1	0	OV	Ведь даже если Путина поймают на лжи, как в случае с Сергеем Гуриевым, которого он якобы знать не знает и которого (как доказали блогеры) он совсем недавно величал по имени-отчеству, это отнюдь не скажется на его рейтинге.	поймать
Чужаков	chuzhak	чужак	1	0	OV	Чужаков убивают, изгоняют, грабят.	убивать
сердце	serdtse	сердце	1	0	OV	Убитых, раненых много, так что тошно глядеть, сердце захватывает.	захватывать
Исключение	iskljuchenie	исключение	1	0	OV	Исключение составляет трансплантация доли печени.	составлять
Оценки	otsenka	оценка	1	1	OV	Оценки каждый сделает сам, исходя из своих нравственных ориентиров.	делать
это	eto	это	1	0	OV	Однако они это показывают, потому что именно через называние преступлений преступлениями происходит очищение и собственной души, и отношений с другими народами.	показывать
Голоса	golos	голос	1	0	OV	Голоса собирают в нескольких точках по всему городу (в аптеках, магазинах, парикмахерских, в редакции газеты).	собирать
это	eto	это	1	0	OV	"Конечно, - сказал, - сейчас мы это обсудим, и с вами свяжется кто-нибудь, скажет время".	обсудить
Проблему	problema	проблема	1	0	OV	Проблему представляют "халявщики" - люди, которые ведут себя сугубо рационально: пользуются всеми общественными благами, но отказываются вносить свою лепту в них.	представлять
работника	rabotnik	работник	1	1	OV	Если работника предприятия увольняют, но он сохраняет за собой пай - он превращается в обычного акционера.	увольнять
это	eto	это	1	0	OV	Поскольку, как мы это видим, наблюдая многих людей творческих профессий, творческий труд содержит вознаграждение в самом себе, заниматься им - удовольствие.	видеть
все	vse	все	1	0	OV	А что делать, все отдашь.	отдать
Все	vse	все	1	0	OV	Все свозят на электростанции, где можно железной дорогой, где трамваем, где автомашиной.	свозить
культуру	kul'tura	культура	1	1	OV	Если на чисто экономические, то культуру неминуемо задушит "невидимая рука рынка", и выживет одна лишь поп-культура.	задушить
ногу	noga	нога	1	0	OV	Потом хозяйка рассказала мне, как они, войдя в старый захламленный сарай, осмотрелись, почесали затылки и, высказавшись в том смысле, что тут сам черт ногу сломит, пошли назад.	сломить
храм	hram	храм	1	2	OV	Выслушав ответ, смысл которого сводился к тому, что она студентка, что храм вообще не посещает и что задержали ее вовсе и не у храма, а на соседней улице, где она и оказалась-то случайно, парень впал в состояние истерики.	посещать
все	vse	все	1	0	OV	В условиях войны им находили расхожее оправдание, жонглируя известным афоризмом: мол, война все спишет.	списать
стоимость	stoimost'	стоимость	1	0	OV	Гламурную экзотику массовому потребителю предоставляют тематические рестораны, клубы, отели, парки, которые предлагают разные сервисы, но стоимость создают одинаково - вживлением экзотики в блюда, развлекательные программы, дизайн интерьеров.	создавать
красоты	krasota	красота	1	0	OV	Динамика индустрии красоты впечатляет: мировой объем продаж товаров для красоты к 2006 году достиг 280 миллиардов долларов, а объем услуг, оказываемых профессионалами индустрии красоты, составил свыше 100 миллиардов долларов.	впечатлять
ГПК	GPK	ГПК	1	0	OV	От сетевых структур, созданных на принципах виртуализации, ГПК отличает главный организационный принцип.	отличать
все	vse	все	1	0	OV	Потребительски относясь ко всему, они все превращают в проекты с максимально быстрой отдачей, из которых по достижении максимума выходят ради других подобных проектов, демонстрируя парадоксальную для традиционных буржуа логику: они избавляются от бизнеса на волне его подъема.	превращать
Россию	Rossija	Россия	1	0	OV	Россию размещают во втором, произносят ряд заклинаний о том, какие мы особенные.	размещать
" ГОЛОС "	golos	голос	1	1	OV	- "ГОЛОС" называют анти-Центризбиркомом.	называть
деньги	den'gi	деньги	1	1	OV	Как-то непривычно, мы привыкли, что мы независимые и ни у кого деньги не берем.	брать
организацию	organizatsija	организация	1	0	OV	Мне кажется, это какой-то нонсенс: организацию награждают международной премией - нет чтобы порадоваться за своих, что премию дают российской организации, так ее за это считают агентом и тащат в суд.	награждать
премию	premija	премия	1	0	OV	Мне кажется, это какой-то нонсенс: организацию награждают международной премией - нет чтобы порадоваться за своих, что премию дают российской организации, так ее за это считают агентом и тащат в суд.	давать
народ	narod	народ	1	0	OV	А тут им проплатили, вот они на Болотную и ходят, они народ баламутят.	баламутить
Юру	Jura	Юра	1	0	OV	Потом стали доходить слухи, что Юру видят у магазина на Круглой площади (он жил рядом).	видеть
Цифры	tsifra	цифра	1	1	OV	Цифры то завышают, то преуменьшают.	завышать
" это "	eto	это	1	1	OV	Возле него всегда кружились мальчишки, чтобы подсмотреть через щель или дырку от выбитого сучка, как "это" делают девочки или молодые тети.	делать
это	eto	это	1	1	OV	Горбачев не таков, и это все знают".	знать
банк	bank	банк	1	2	OV	А банк мы скоро национализируем.	национализировать
тело	telo	тело	1	0	OV	До этого Хаттаб в другом интервью Kavkaz.org сообщил, что голову офицера подбросит на кладбище в Урус-Мартановском районе Чечни, где похоронена убитая Будановым Эльза Кунгаева, а тело обменяет на трупы боевиков.	обменять
реформу	reforma	реформа	1	0	OV	Шваб отметил, что "на этот раз реформу поддерживают все, с кем мы встречаемся".	поддерживать
вакцину	vaktsina	вакцина	1	0	OV	Более того - в ближайшем будущем вакцину получат американские криминалисты и даже сотрудники почтовых компаний.	получить
Аль-Харири	al'-hariri	аль-харири	1	0	OV	Аль-Харири сопровождает делегация, в которую входят министр энергетики Мухаммед Байдун, министр экономики Басиль Флейхан, министр культуры Гассан Саламе, председатель Торгово-промышленной палаты Аднан Кассар и президент Ассоциации стимулирования инвестиций Камаль Хайек.	сопровождать
имена	imja	имя	1	0	OV	Большинству вирусов имена дают именно производители антивирусов, первыми обнаружившие вирус и исследовавшие его.	давать
имя	imja	имя	1	1	OV	В любом случае, имя вирусу дает его исследователь, и оно основывается на каких-либо характеристиках, отличающих конкретную вредоносную программу от других.	давать
Фрэнкса	Frenks	Фрэнкс	1	1	OV	В четверг Фрэнкса снова ждут в Узбекистане, откуда он отправится в Таджикистан, где за последние две недели побывали спикер российской Госдумы Геннадий Селезнев и глава Федеральной пограничной службы России Константин Тоцкий.	ждать
Телеканал	telekanal	телеканал	1	0	OV	"Телеканал получит тот, кто выиграет тендер", - сказал Волин.	получить
Мубарака	Mubarak	Мубарак	1	0	OV	Как сообщает пресс-служба Белого дома, во вторник Мубарака примет президент США Джордж Буш.	принять
Журналистов	zhurnalist	журналист	1	0	OV	Журналистов познакомят с инфраструктурой космодрома и подготовкой к запуску научных космических аппаратов "Грейс" (Германия и США) на конверсионном ракетоносителе "Рокот".	знакомить
Делегации	delegatsija	делегация	1	2	OV	Делегации на встрече возглавляют заместитель главы МИД России Евгений Гусаров и заместитель генерального секретаря НАТО Гюнтер Альтенбург.	возглавлять
участие	uchastie	участие	1	0	OV	Как сообщили представители Госдепартамента, в саммите Россия - ЕС, который пройдет в Мадриде, Пауэлл участие примет.	принять
Рынок	rynok	рынок	1	0	OV	"Рынок мучают предупреждения компаний", подчеркнул Ларри Уочтел (Larry Wachtel), специалист по конъюнктуре рынка Prudential Financial.	мучить
Это	eto	это	1	0	OV	(Это просят сделать люди, сидящие там!)	просить
убытки	ubytok	убыток	1	2	OV	Связанные с этим убытки телевизионщики не комментируют.	комментировать
лицо	litso	лицо	1	0	OV	Тело богато украшено ожерельями и браслетами, лицо покрывает стальная маска.	покрывать
народ	narod	народ	1	1	OV	Нет, смертью народ не удивишь, лайнером - тоже.	удивить
петуха	petuh	петух	1	1	OV	Добрая мать: никогда себе петуха не купит, только ему, Гарусову.	купить
Обед	obed	обед	1	2	OV	Обед на стол поставит и не посмотрит - ел ли?	ставить
другой	drugoj	другой	1	0	OV	Жива буду - я спасу, помру - другой спасет.	спасти
чайник	chajnik	чайник	1	0	OV	Встань, чайник согрей, чаем меня напои по-хорошему.	согреть
Адрес	adres	адрес	1	0	OV	Адрес знаешь?	знать
работничков	rabotnichek	работничек	1	0	OV	Это могло означать: тоже, работничков посылают…	посылать
Арифметику	arifmetika	арифметика	1	0	OV	#NAME?	знать
" Катюшу "	katjusha	катюша	1	1	OV	- А "Катюшу" можете? - спросила Нюра, та самая полнолицая техничка, которая тогда, в первый день, махнула на меня бадейкой.	мочь
" Катюшу "	katjusha	катюша	1	2	OV	- Я "Катюшу" сильно обожаю.	обожать
все	vse	все	1	0	OV	Говорить о себе Панька не любит, сведения о ней ходят стороной, главным образом через Капу, которая все знает.	знать
чайник	chajnik	чайник	1	0	OV	Заболеешь - соседи купят что надо, принесут, чайник согреют.	согреть
человека	chelovek	человек	1	1	OV	А потом, смотришь, человека уже передвигают на другое место.	передвигать
Телепрограммы	teleprogramma	телепрограмма	1	2	OV	Телепрограммы у нас ретранслируют 7 искусственных спутников Земли, работающие через 10 каналов связи.	ретранслировать
Деталь	detal'	деталь	1	0	OV	Деталь восстанавливают нагреванием.	восстанавливать
инструмент	instrument	инструмент	1	0	OV	В обычном токарном станке инструмент устанавливают так, чтобы его режущая кромка была на одной высоте с осью заготовки.	устанавливать
воду	voda	вода	1	1	OV	В зону электромагнитного привода воду не пропускает разделительная диафрагма.	пропускать
Заготовку	zagotovka	заготовка	1	2	OV	Заготовку с усилием продавливают через специальное устройство - цилиндр с толстыми стенками, который книзу сужается в виде воронки и заканчивается еще более узким каналом.	продавливать
воду	voda	вода	1	0	OV	В первом случае, при береговом варианте, воду гонят насосы.	гнать
людей	chelovek	человек	1	0	OV	Причем людей интересуют не только имена кандидатов, но и мнения о них и их программах граждан, экспертов.	интересовать
это	eto	это	1	2	OV	Надеюсь, мне удалось доказать, что мы это не только понимаем, но и действуем и внутри страны, и на международной арене, сообразуясь с упомянутым и абсолютно верным девизом.	понимать
историю	istorija	история	1	0	OV	Читая сегодняшние научные работы, вы и не вспомните, что историю делают люди.	делать
отца	otets	отец	1	0	OV	Моего отца он приветствовал, как доброго знакомого, но я настолько уж привык к тому, что отца знают все в этом сказочном городе, что перестал испытывать гордость от подобных знаков внимания.	знать
всех	vse	все	1	0	OV	Среди ночи вдруг всех будят.	будить
Пушку	pushka	пушка	1	5	OV	Пушку потом за один день не соберешь.	собрать
что-то	chto-to	что-то	1	0	OV	Да, что-то припоминаю.	припоминать
Это	eto	это	1	2	OV	Это Лаврентий точно обеспечит.	обеспечить
Что	chto	что	1	2	OV	Что они там предлагают?	предлагать
школу	shkola	школа	1	0	OV	Там школу отремонтируют, где-то построят детский садик, больницу, клуб и т.д.	отремонтировать
кого	kto	кто	1	1	OV	Значительно лучше учить надо тех, кто учит, и тех, кого они учат.	учить
что	chto	что	1	1	OV	Советский Союз развалился по другой причине: Горбачев разрешил людям говорить то, что они думают.	думать
резервы	rezerv	резерв	1	1	OV	А как еще Центробанк может действовать в таких условиях, если ему говорят: "Прекращай падение рубля, но резервы не трогай"?	трогать
это	eto	это	1	3	OV	Те, кто на Западе просчитывал эффект санкций, это более или менее знают: у них есть примеры Ирана и других стран.	знать
что	chto	что	1	1	OV	Ведь что мы наблюдаем?	наблюдать
санкции	sanktsija	санкция	1	0	OV	И я думаю, что большинство предпринимательских сообществ за рубежом готово высказаться так: "Давайте с политикой разбирайтесь, а санкции снимайте, потому что нам это важно".	снимать
которые	kotoryj	который	1	3	OV	Чтобы свободно-рыночные силы, предпринимательство, которое в принципе настроено на глобальную экономику, были подавлены и сведены в чеболи, которые сейчас нам практически навязывают.	навязывать
который	kotoryj	который	1	0	OV	Выбор, который навязывают Киеву предводители "ополченцев" и российские политики, таков: предоставьте нам право вето в решении всех основных вопросов государственного строительства на Украине и ее внешнеполитической ориентации или получите гражданскую войну.	навязывать
кого	kto	кто	1	0	OV	Или того, кого примет за такового.	принять
который	kotoryj	который	1	0	OV	О достоинствах "размена Польши на Грецию", который поминает Пастухов, наверное, нелишне было бы спросить два поколения поляков (а заодно и других восточноевропейцев), которые дождались вознаграждения лишь через 40 лет.	поминать
ответственность	otvetstvennost'	ответственность	1	0	OV	Ответственность распределяется так: капитан отвечает за все и всегда, в порту ответственность несет- капитан порта или его заместитель по рыбопромысловому флоту.	нести
Кого-то	kto-to	кто-то	1	0	OV	Кого-то проверяют без предупреждения, остальные боятся.	проверять
Оппозицию	oppozitsija	оппозиция	1	1	OV	Оппозицию не пустят на выборы в Госдуму из-за токсичных подписей.	пустить
кого	kto	кто	1	1	OV	"Крым сломал наше единство, разделив меня со многими из тех, кого я люблю, ценю и не могу простить", - с горечью подтверждает эссеист Александр Генис.	любить
других	drugoj	другой	1	0	OV	Оставалось одно: замкнуться в себе и молчать, пока других лихорадит и в них бурлят страсти".	лихорадить
который	kotoryj	который	1	0	OV	Два этих сходных по номеру года (1914 и 2014) стали годами, в течение которых мы увидели прямое действие того эмоционального комплекса, который называют либо "шовинистическим угаром", либо "подъемом патриотизма".	называть
которые	kotoryj	который	1	1	OV	Историк Александр Янов отмечает, что подобные всплески коллективных эмоций, которые он называет "патриотическими истериями", случались в русской истории постоянно, по крайней мере с начала XIX века.	называть
ЧТО	chto	что	1	0	OV	ЧТО МОЖЕТ ТЕЛЕВИДЕНИЕ.	мочь
ЧТО	chto	что	1	0	OV	СЛЫШАТЬ ТО, ЧТО ХОЧЕШЬ.	хотеть
кого	kto	кто	1	0	OV	Вопрос о том, кто кого формирует - пресса формирует общественное мнение или наоборот, - сложный, запутанный и не имеющий однозначного решения.	формировать
предпочтение	predpochtenie	предпочтение	1	0	OV	Я был почти уверен, что предпочтение отдадут "законной" очереди.	отдать
враждебность	vrazhdebnost'	враждебность	1	0	OV	Когда кто-то в принципе оппонирует по любому вопросу, враждебность вызывает уже сам факт его высказывания.	вызывать
это	eto	это	1	0	OV	Теперь это называют культурно: "войной нового типа".	называть
которые	kotoryj	который	1	1	OV	- Есть такое, но знаете, сюжеты, которые мы видим, по темникам не распишешь, это уже сериал, это Голливуд со спецэффектами, только не с пиниями и цветами.	видеть
что	chto	что	1	1	OV	В Европе кричат ровно то же, что мы кричим: "Верните все назад!"	кричать
все	vse	все	1	0	OV	Телевизионные программы давно пробурили плинтус и далее все упрощают.	упрощать
все	vse	все	1	0	OV	Но, повторяю, все играют в игру "Путин поговорил с Порошенко", и людей убивать стали меньше.	играть
кое-что	koe-chto	кое-что	1	0	OV	Мы кое-что понимаем теперь и в Русском мире - настоящем, а не вымышленном.	понимать
Что	chto	что	1	1	OV	Что мы знаем о повседневной жизни 70 миллионов людей, оказавшихся на оккупированных территориях?	знать
Историю	istorija	история	1	1	OV	Историю не возвышают до понимания проблем и "вызова времени", но используют как сырье для штампов, отучающих искать правду и думать головой.	возвышать
" Сколково "	Skolkovo	Сколково	1	3	OV	Казалось, власть глубины этих слоев не видит ("Сколково" так и пестуют в среде тотальной косности).	пестовать
все	vse	все	1	0	OV	Циничная ирония все делает ненастоящим.	делать
Переоценку	pereotsenka	переоценка	1	3	OV	Переоценку в таких случаях делает управляющая компания при участии "своего" оценщика, которого трудно назвать независимым, и регистрирует изменения в специализированном депозитарии.	делать
углеводороды	uglevodorod	углеводород	1	0	OV	В странах, которые углеводороды перерабатывают, доходы, наоборот, растут.	перерабатывать
которых	kotoryj	который	1	5	OV	В Европе достаточно сланцевого газа, однако добыча его затруднена из-за европейской бюрократии и активизма "зеленых", которых, кстати, часто щедро финансирует Кремль.	финансировать
что	chto	что	1	0	OV	Это хорошая иллюстрация к парадоксальной на первый взгляд мысли, которую высказал российский нейробиолог, член-корреспондент РАН Константин Анохин: "Мозг делает все сам; и только иногда сообщает нам то, что считает нужным".	считать
которые	kotoryj	который	1	0	OV	Должны быть очевидные для всех стратегии; одна из них - прямая связь между теми навыками, которые дает человеку школа, и рынками труда.	давать
ученика	uchenik	ученик	1	0	OV	Но недопустима ложная стандартизация, когда ученика подгоняют под образовательную схему, а не схему настраивают под ученика.	подгонять
это	eto	это	1	4	OV	Сегодня учитель не столько объясняет материал и увлекательно доносит до учеников новую информацию (это за него с легкостью делает Google), сколько умеет мотивировать учеников, налаживать отношения между ними, организовывать образовательную среду, в которой становится возможным творческое исследование и присвоение учебного материала.	делать
Кэги	Kegi	Кэги	1	1	OV	Еще в 19-м веке немцы поселялись в этих краях, но Кэги больше интересует век двадцатый - сталинская депортация во время войны, советские комсомольские стройки, постсоветская работа иностранцев-контрактников в стране, стоящей на нефти, как Арабские Эмираты.	интересовать
которых	kotoryj	который	1	2	OV	Вот так, "на пальцах", Штефан теперь рассказывает про людей, которых чья-то воля швыряет по миру, лишая дома и корней.	швырять
Бэби-боксы	bebi-boks	бэби-бокс	1	1	OV	Бэби-боксы резко критикуют уполномоченный по правам ребенка в РФ Павел Астахов, глава Патриаршей комиссии по вопросам семьи, защиты материнства и детства Димитрий Смирнов, директор департамента медицинской помощи детям и службы родовспоможения Минздрава России Елена Байбарина.	критиковать
лингвистов	lingvist	лингвист	1	2	OV	Но лингвистов гораздо больше занимает, почему люди именно так говорят и пишут.	занимать
Что	chto	что	1	0	OV	Что значит "ошибаемся"?	значить
что	chto	что	1	1	OV	В анатомии много того, что мы называем не так, как медики и биологи.	называть
которые	kotoryj	который	1	1	OV	В анатомии и медицине много подобных примеров: это такие области, которые люди обсуждают и в быту, и не в быту.	обсуждать
предмет	predmet	предмет	1	0	OV	Нет такой штуки, которой предмет покажешь, а она скажет, что это.	показать
водолазку	vodolazka	водолазка	1	3	OV	А в Питере водолазку до сих пор называют "бодлон".	называть
водолазку	vodolazka	водолазка	1	0	OV	В некоторых регионах водолазку называют битловкой, потому что битлы такое носили.	называть
Что	chto	что	1	1	OV	Что оно значит?	значить
что	chto	что	1	1	OV	Дальше вопрос: что это значит?	значить
Что	chto	что	1	0	OV	Что означает, что одна лингвистическая теория лучше другой?	означать
лингвиста	lingvist	лингвист	1	3	OV	Или всё же если самое простое описание противоречит интуиции и лингвисту кажется, что оно "не похоже" на описываемое языковое явление, то лингвиста такое описание не удовлетворит?	удовлетворить
что	chto	что	1	3	OV	Если же к теоретической лингвистике относить формальные системы типа грамматики Монтегю, то тут я должен признаться, что за этой областью не слежу, а то немногое, что я случайным образом знаю, кажется мне неприменимым в реальной работе с материалами естественных языков.	знать
" накачку "	nakachka	накачка	1	1	OV	Утром все в разобранном виде, еле языком ворочают, а он в шесть утра уже на стройке, "накачку" дает.	давать
все	vse	все	1	2	OV	Что он один все за нас сделает.	сделать
все	vse	все	1	0	OV	- Казалось, одним рывком все одолеем.	одолеть
других	drugoj	другой	1	0	OV	Бесталанные и малограмотные, они не только сами мало что знают, но и других ограждают от "лишних" познаний.	ограждать
которые	kotoryj	который	1	0	OV	Ибо тридцать тысяч подписчиков в Фейсбуке и несколько сот стабильных лайков под его далеко не самыми резонансными блогами в "Украинской правде" не идут ни в какое сравнение с миллионными аудиториями, которые имеют наиболее громкие телепрограммы-расследования.	иметь
еду	eda	еда	1	0	OV	Но когда ты видишь, что еду сжигают, у тебя возникает неприятное чувство.	сжигать
это	eto	это	1	0	OV	О том, как именно она это делает, я скажу чуть позже.	делать
который	kotoryj	который	1	6	OV	И о том, что некоторые из них имеют знак плюс - знак, который они, дай бог, не потеряют.	потерять
Что	chto	что	1	1	OV	Что он делает в СИЗО?	делать
упреки	uprek	упрек	1	1	OV	- Однако упреки вы адресуете чаще "силовикам", а изменения предлагаете в суде.	адресовать
изменения	izmenenie	изменение	1	0	OV	- Однако упреки вы адресуете чаще "силовикам", а изменения предлагаете в суде.	предлагать
который	kotoryj	который	1	0	OV	Яд, который подмешивают к политической и духовной пище, разрушает нравственные устои общества.	подмешивать
Это	eto	это	1	6	OV	Это, в свою очередь, специалисты объясняют снижением уровня материальных и социальных притязаний в пожилом возрасте.	объяснять
печаль	pechal'	печаль	1	0	OV	Мы печаль выносим за скобки нашей жизни.	выносить
которые	kotoryj	который	1	1	OV	Девочкой она ничем не выделялась в толпе коричневых гимназических платьиц: что можно было сказать о ней, кроме того, что она из числа хорошеньких, богатых и счастливых девочек, что она способна, но шаловлива и очень беспечна к тем наставлениям, которые ей делает классная дама?	делать
что	chto	что	1	1	OV	Лежа на парте, я внимательно слушал голос учителя, не отвлекаясь на обычные шалости, и старался запомнить все, что он говорит.	говорить
все	vse	все	1	0	OV	Получалось, что они так хорошо и доходчиво доносят свой предмет, что ученики, даже не пользуясь учебниками, все усваивают,	усваивать
что	chto	что	1	2	OV	Когда экзаменатор или, скажем, начальник кивает тебе головой в знак согласия с тем, что ты ему говоришь, так уж, будь добр, валяй дальше, а не возвращайся к сказанному, потому что ты этим самым ставишь его в какое-то не вполне красивое положение.	говорить
Погоду	pogoda	погода	1	0	OV	#NAME?	передавать
что	chto	что	1	1	OV	- Ну как, - говорю я, - что там передают насчет погоды?	передавать
что	chto	что	1	0	OV	- Так если воспитательница берет грушу домой, представляете, что берет директор детского сада?! - почти выкрикнул он и снова расхохотался.	брать
что-то	chto-to	что-то	1	0	OV	- Хватает, - сказал он и обобщенно добавил: - С мяса всегда что-то имеешь.	иметь
что	chto	что	1	0	OV	Я хотел было спросить, что именно он имеет с мяса, чтобы установить, что имеет директор комбината, но не решился.	иметь
что-нибудь	chto-nibud'	что-нибудь	1	0	OV	На самом деле в это время я что-нибудь изобретаю или, склонившись над машинкой, прислушиваюсь к телефону в другой комнате.	изобретать
это	eto	это	1	0	OV	Однако власти это учтут и предусмотрят программу софинансирования, ожидает аналитик.	учесть
это	eto	это	1	0	OV	Я хорошо это знаю, так как одно время, как и он, работала в институте русского языка АН.	знать
Что	chto	что	1	0	OV	- Что слышу я, прокуратор? - гордо и спокойно ответил Каифа, - ты угрожаешь мне после вынесенного приговора, утвержденного тобою самим?	слышать
которого	kotoryj	который	1	1	OV	Разве я похож на юного бродячего юродивого, которого сегодня казнят?	казнить
что	chto	что	1	0	OV	Знаю, что говорю и где говорю.	говорить
это	eto	это	1	2	OV	Ни тебе, ни народу твоему, - и Пилат указал вдаль направо, туда, где в высоте пылал храм, - это я тебе говорю - Пилат Понтийский, всадник Золотое Копье!	говорить
что	chto	что	1	1	OV	- Веришь ли ты, прокуратор, сам тому, что сейчас говоришь?	говорить
это	eto	это	1	1	OV	Не мир, не мир принес нам обольститель народа в Ершалаим, и ты, всадник, это прекрасно понимаешь.	понимать
которых	kotoryj	который	1	11	OV	Он не хотел почему-то видеть группу осужденных, которых, как он это прекрасно знал, сейчас вслед за ним возводят на помост.	возводить
кого	kto	кто	1	3	OV	- Имя того, кого сейчас при вас отпустят на свободу…	отпустить
Кого	kto	кто	1	0	OV	Любопытные входили в процессию, спрашивали: "Кого хоронят?"	хоронить
Что	chto	что	1	2	OV	Что у вас говорят в деревне?	говорить
что	chto	что	1	0	OV	#NAME?	говорить
Истину	istina	истина	1	0	OV	Истину ищут только одиночки и порывают со всеми, кто любит ее недостаточно.	искать
кол	kol	кол	1	0	OV	А ему хоть кол теши на голове!	тесать
что	chto	что	1	1	OV	Эту беззаботность придавало ощущение связности человеческих существований, уверенность в их переходе одного в другое, чувство счастья по поводу того, что все происходящее совершается не только на земле, в которую закапывают мертвых, а еще в чем-то другом, в том, что одни называют царством Божиим, а другие историей, а третьи еще как-нибудь.	называть
Что	chto	что	1	0	OV	Что значит быть евреем?	значить
это	eto	это	1	1	OV	Я это решительно отрицаю.	отрицать
что	chto	что	1	1	OV	Если все мнения равноправны, то я могу сесть и немедленно отправить и мое мнение в Интернет, не затрудняя себя многолетним учением и трудоемким знакомством с тем, что уже знают по этому поводу те, кто посвятил этому долгие годы исследования.	знать
Дом	dom	дом	1	1	OV	Дом я отремонтирую.	отремонтировать
это	eto	это	1	0	OV	Но теперь, когда у меня появилась поддержка большого количества людей, я это чувствую.	чувствовать
нервы	nerv	нерв	1	0	OV	Роман, вы себе нервы портите или вы чувствуете себя неуязвимым?	портить
что	chto	что	1	0	OV	И кажется, что об американцах все и всё уже знают - как они живут, работают, отдыхают и даже что думают.	думать
который	kotoryj	который	1	2	OV	Девственно-белый, пушистый и сухой, как пудра, снег, который так и называют Utah Powder, был даже официально зарегистрирован как охраняемая торговая марка The Greatest Snow on Earth.	называть
русских	russkij	русский	1	0	OV	Нас стали узнавать в супермаркетах (которых было всего два), и все знали, что русских зовут Алла и Миша.	звать
елку	elka	елка	1	0	OV	#VALUE!	ставить
всех	vse	все	1	12	OV	А еще обязательно устраивается концерт, потому что всех с детства, независимо от слуха, способностей и даже желания, учат играть на различных музыкальных инструментах - гитаре, скрипке, флейте…	учить
математику	matematika	математика	1	1	OV	По какой-то неизвестной причине большинство жителей Америки, по моим наблюдениям, математику не любят.	любить
соревнования	sorevnovanie	соревнование	1	0	OV	Начиная с того времени ежегодно со всей Юты в Сидар-сити съезжаются более девяти с половиной тысяч участников всех возрастов и профессий и еще пятьдесят тысяч зрителей; соревнования обслуживает тысяча волонтеров.	обслуживать
все	vse	все	1	0	OV	Когда ты не жертва всего и всех, а free agent - независимый, самостоятельный человек, обладающий свободой воли, который все решает сам.	решать
Фразу -	fraza	фраза	1	2	OV	#NAME?	придумать
Еду	eda	еда	1	6	OV	Еду раз в две недели для него готовит Йохем.	готовить
Собаку	sobaka	собака	1	0	OV	Собаку любит безмерно, называет лучшим другом, засыпает лишь при условии, что Юма лежит у него под боком.	любить
которого	kotoryj	который	1	2	OV	Частенько на лугу появляется дама с 70-килограммовым мастифом, которого она нежно называет "Мойзе-мышка", не обращая внимания ни на кого вокруг.	называть
забор	zabor	забор	1	0	OV	Тут подъехал некий мужчина на велосипеде, открыл ворота и, пряча в воротник удовлетворенную улыбку, спросил: "А что это вы забор портите?"	портить
которых	kotoryj	который	1	1	OV	Больше половины людей, которых я встречаю на улицах Бадена - это тощие немецкие старухи (тощие не от болезни, дело в моде) в спортивной одежде самых дорогих марок, все коротко стриженные крашеные блондинки, с силиконовыми губами-пельменями, пластиковыми зубами неимоверной белизны, в огромных очках и шляпах, с ужасными морщинистыми руками в бриллиантовых кольцах, со сто раз прооперированными на но…	встречать
который	kotoryj	который	1	0	OV	Это классический подход, который использует большинство стран.	использовать
работодателя	rabotodatel'	работодатель	1	2	OV	Вместо попытки воссоздания "крепостного права", когда работодателя фактически "закрепляют" за работником, которого он нанял, государству следовало бы дать работнику и работодателю возможность самим определить формат своих отношений, а самому сосредоточиться на помощи бедным и больным.	закреплять
что	chto	что	1	0	OV	Никакого высокомерия: народ хочет именно то, что получает.	получать
что	chto	что	1	1	OV	Линней Трайп снимал то, что хотел снимать, - в отличие от посетителей выставки Александра Маккуина, которые хотят видеть именно то, что им предлагают.	предлагать
многое	mnogoe	многое	1	0	OV	Обратим внимание на несколько любопытных деталей, которые многое проясняют в той самой знаменитой концепции "Запад versus Восток", что некогда столь превратно истолковал Киплинг.	прояснять
который	kotoryj	который	1	1	OV	На прием, который я веду по вторникам, каждый раз приходит человек 7-10.	вести
все	vse	все	1	0	OV	Понятно, что это игра с нулевой суммой, и проигравший все теряет, но при всех рисках цена победы высока.	терять
что	chto	что	1	0	OV	Я не очень детально знаю, что делают другие, но точно знаю, что делаю я.	делать
что	chto	что	1	0	OV	Я не очень детально знаю, что делают другие, но точно знаю, что делаю я.	делать
все	vse	все	1	0	OV	- Да, все узнаете.	узнавать
это	eto	это	1	0	OV	Думали, что мы это проглотим, думали, что я не очень хочу этим заниматься.	проглотить
который	kotoryj	который	1	1	OV	Дело же в том, что у меня подход в работе отличается от того, который обычно исповедуют военные.	исповедовать
Собянина	Sobjanin	Собянин	1	0	OV	Если Собянина заменят на кого-то другого из окружения Путина, то система изменится только стилистически.	заменить
все	vse	всё	1	0	OV	Однако это не исключает того, что человек все понимает во время совершения преступления.	понимать
что	chto	что	1	0	OV	При физиологическом аффекте человек частично понимает, что делает, но не может остановиться, не зря же его называют аффектом злости.	делать
что-то	chto-to	что-то	1	1	OV	Если что-то не помнит проверяемый, всегда можно запросить документы в медицинских учреждениях, где он раньше жил и родился.	помнить
человека	chelovek	человек	1	0	OV	К тому же экспертиза проводится амбулаторно, и если не хватает документов для того чтобы выставить диагноз, человека направляют для проведения стационарной экспертизы.	направлять
детей	rebenok	ребенок	1	0	OV	- Они детей крадут, - шепнула Вика сестре, и пока та обдумывала эту новую опасность жизни, Виктория уже спустила с поводка свое воображение: - В нашем поселке уже двоих украли!	красть
что	chto	что	1	0	OV	- Ой, что вижу, что вижу…	видеть
что	chto	что	1	0	OV	- Ой, что вижу, что вижу…	видеть
которых	kotoryj	который	1	2	OV	И лошадка их стреноженная на самом деле была не лошадкой, а двумя украденными мальчиками Витей и Шуриком, которых давно уже разыскивают родители, да никогда не найдут…	разыскивать
детей	rebenok	ребенок	1	0	OV	Это была ее поблажка Фене, которая блюла свою честь перед соседками и не уставала им напоминать: "Я не кухарка, я детей подымаю".	поднимать
кошечек	koshechka	кошечка	1	1	OV	А мы здесь кошечек очень любим.	любить
девушку	devushka	девушка	1	5	OV	Там нормально, что девушку без ее на то воли превращают в жену соответствующего поведения.	превращать
что	chto	что	1	1	OV	То, что мы наблюдаем сегодня, описывается фразой Антония Великого: "Наступят последние времена, когда девять больных придут к одному здоровому и скажут: ты болен, потому что ты не такой, как мы".	наблюдать
власть	vlast'	власть	1	0	OV	1 апреля 1941 года в результате переворота в Ираке власть захватывает прогерманская националистическая группировка Рашида Али-Гайлани.	захватывать
войну	vojna	война	1	1	OV	Помимо США на следующий день войну Японии объявляют также Великобритания, Нидерланды (правительство в эмиграции), Канада, Австралия, Новая Зеландия, Южно-Африканский Союз, Куба, Коста-Рика, Доминиканская Республика, Сальвадор, Гондурас и Венесуэла.	объявлять
верх	verh	верх	1	0	OV	В этой битве на истощение в конце концов верх одерживают Соединённые Штаты.	одерживать
власть	vlast'	власть	1	3	OV	Немцы начинают эвакуацию войск с территории Югославии и Греции, где власть в свои руки берут народно-освободительные движения.	брать
власть	vlast'	власть	1	0	OV	Если власть берут, не очень спрашивая избирателей, страшно выпустить ее из рук.	брать
что	chto	что	1	0	OV	- Я могу придумывать, что хочу?	хотеть
Что	chto	что	1	3	OV	#NAME?	сказать
который	kotoryj	который	1	1	OV	Морянов истинный почувствовал неловкость и отчасти свою вину и произнес в свою очередь: - Извините… это все коньяк… замечу, я такого никогда не пил… но вот что, раз вы прошли так блестяще кастинг… то приглашаю вас в новый телесериал, который я устраиваю… да и вашей жене там место и роль найдется.	устраивать
алименты	alimenty	алименты	1	0	OV	Я чист совершенно… вот даже алименты плачу.	платить
что	chto	что	1	1	OV	- Да уж… сейчас самое горячее время… если бы вы знали, что мы снимаем сейчас на "Мосфильме"… самое интересное кино, какое можете себе представить… увидите - закачаетесь.	снимать
земунцев	zemunets	земунец	1	3	OV	Не сказать, что земунцев этот факт очень смущает.	смущать
блин	blin	блин	1	0	OV	Второй вариант - блин смазывают пастой из молочного шоколада со вкусом лесного ореха и обсыпают той же смесью кешью с брусникой.	смазывать
которых	kotoryj	который	1	0	OV	Если журналист или просто турист, то проходишь внутренний периметр безопасности, за ним стоянка такси - надежные водители, которых знают в лицо местные полицейские и военные.	знать
мазгуф	mazguf	мазгуф	1	1	OV	Поэтому теперь мазгуф обычно готовят в духовке.	готовить
рыбу	ryba	рыба	1	1	OV	И рыбу меньше высушивает, если готовить на земле.	высушивать
Лук -	luk	лук	1	3	OV	Лук - тоже мелко нарезаем.	нарезать
Мясо	mjaso	мясо	1	0	OV	Мясо обжариваем в большом количестве масла.	обжаривать
пьяного	p'janyj	пьяный	1	0	OV	В окно я видел пьяного, спящего под жестяным грибком на детской площадке; милиционера, пытающегося разбудить пьяного просто словами и словами, составленными в многоэтажные конструкции; ворону, расхаживающую возле них и думающую о том, что как только пьяного затащат в милицейский уазик, она быстро заберет лежащий рядом с ним кусок колбасы и улетит на крышу трансформаторной будки.	затащить
Что	chto	что	1	0	OV	Он приветливо нам помахал и спросил: "Что ищете?"	искать
что	chto	что	1	1	OV	На научной конференции к столетию Пастернака, запутавшись в этом не очень понятном языке, вскочил недовольный Коржавин с каким-то возражением, но многоумный Омри Ронен, блистательно владеющий литературоведческим воляпюком, крикнул: "А что тут делают поэты?	делать
что	chto	что	1	1	OV	На встрече исхудавший Мишка сказал ей все, что он думает о ее коллаборационизме, и хлопнул дверью своей "палаты номер шесть".	думать
вопрос	vopros	вопрос	1	0	OV	Утрируя, вопрос ставят так: что страшнее и опаснее - риск смерти некоторых или резкое снижение уровня жизни и страдания многих?	ставить
что	chto	что	1	0	OV	Переход к новому технологическому укладу, о котором я писал выше, в ближайшие годы будет завершен, что придаст новый импульс экономическому росту.	придать
биохимиков	biohimik	биохимик	1	1	OV	Часто биохимиков также интересует изотопное соотношение (живые организмы не все изотопы одинаково хорошо встраивают в свои клетки) и хиральность молекул - мало-мальски сложная органика бывает "левой" и "правой", подобно перчаткам.	интересовать
фосфин	fosfin	фосфин	1	0	OV	Может, фосфин продуцируют венерианские вулканы, где он образуется при высокой температуре из магмы?	продуцировать
фосфин	fosfin	фосфин	1	0	OV	Авторы проверили версию, что фосфин заносят метеориты.	заносить
что	chto	что	1	1	OV	То есть фосфин, видимо, действительно обнаружен, но что это значит?	значить
что-то	chto-to	что-то	1	0	OV	Я хотел знать, вправду ли этот человек что-то понимает.	понимать
что	chto	что	1	2	OV	Наконец ко мне вернулся дар речи, и я спросил: - Но… что ты здесь делаешь?	делать
Все	vse	все	1	1	OV	А он беспощадно прибавил: - Все ты путаешь… ничего не понимаешь!	путать
который	kotoryj	который	1	1	OV	Я говорил ему: "Цветку, который ты любишь, ничто не грозит…	любить
что	chto	что	1	0	OV	- Никогда не надо слушать, что говорят цветы.	говорить
вулканы	vulkan	вулкан	1	1	OV	Когда вулканы аккуратно чистишь, они горят ровно и тихо, без всяких извержений.	чистить
Что	chto	что	1	0	OV	#NAME?	делать
Что	chto	что	1	2	OV	#NAME?	делать
Цветы	tsvety	цветы	1	2	OV	- Цветы мы не отмечаем, - сказал географ.	отмечать
что	chto	что	1	1	OV	Они только повторяют то, что им скажешь…	сказать
Что	chto	что	1	2	OV	#NAME?	искать
Людей	chelovek	человек	1	0	OV	- Людей ищу, - сказал Маленький принц.	искать
которые	kotoryj	который	1	0	OV	- Узнать можно только те вещи, которые приручишь, - сказал Лис.	приручить
Что	chto	что	1	2	OV	#NAME?	делать
что	chto	что	1	0	OV	#NAME?	хотеть
что	chto	что	1	1	OV	- Да, - сказал я Маленькому принцу, - все, что ты рассказываешь, очень интересно, но я еще не починил свой самолет, у меня не осталось ни капли воды, и я тоже был бы счастлив, если бы мог просто-напросто пойти к роднику.	рассказывать
что	chto	что	1	0	OV	Я был поражен, вдруг я понял, что означает таинственный свет, исходящий от песков.	означать
что	chto	что	1	0	OV	- На твоей планете, - сказал Маленький принц, - люди выращивают в одном саду пять тысяч роз… и не находят того, что ищут…	искать
кое-что	koe-chto	кое-что	1	0	OV	И потом, я тебе кое-что подарю…	подарить
кролик	konek	конек	1	0	OV	Только в стационар нельзя, там от такого соседства любой кролик коньки отбросит.	отбросить
Змей	zmeja	змея	1	3	OV	Змей из природы как отлавливают?	отлавливать
зубы	zub	зуб	1	1	OV	Мы либо зубы ей сломаем, либо террариум разгрохаем.	сломать
террариум	terrarium	террариум	1	0	OV	Мы либо зубы ей сломаем, либо террариум разгрохаем.	разгрохать
пространство	prostranstvo	пространство	1	0	OV	Только давайте пространство освободим.	освободить
собак	sobaka	собака	1	2	OV	То собак по району разыскиваем, то змею по клинике…	разыскивать
Дорогу	doroga	дорога	1	0	OV	Дорогу осилит идущий, и человек, открывающий новые материки, делает это зачастую в процессе похода в неверную сторону, а непоколебимо сидящий на месте открывает только бутылку и банку сардин.	осилить
которые	kotoryj	который	1	3	OV	В данном случае мы имеем дело с типичным философским заблуждением, смешением фактов, за пределы которых наука не вправе выходить, и ценностей, которые могут быть совершенно субъективными и которые гуманитарии все чаще возводят в ранг фактов.	возводить
которые	kotoryj	который	1	1	OV	А здесь я попробую описать чисто гипотетическую, но вполне вероятную ошибку из области естественных наук, которые нередко именуют точными.	именовать
которые	kotoryj	который	1	4	OV	Присмотримся поближе к этим качествам, которые мы так в себе ценим.	ценить
которые	kotoryj	который	1	1	OV	Более того, сюрпризы, которые нам преподносит этот микромир, пробуждают кое в ком здоровый скептицизм: находим ли мы там то, что есть на самом деле, или то, к чему приспособлено наше ограниченное восприятие?	преподносить
что	chto	что	1	2	OV	Вообразите себе, к примеру, дикого зверя, хотя бы шакала, попадающего в вашу комнату: что он там найдет?	найти
кого	kto	кто	1	2	OV	Не нам суждено быть победителями в этой гонке - и не тем, кого мы безуспешно ищем в необъятных космических просторах.	искать
который	kotoryj	который	1	3	OV	Кто имеет шанс выжить на планете после того, как она окончательно приобретет тот вид, который мы ей старательно придаем?	придавать
который	kotoryj	который	1	1	OV	И к тому же они, как показали недавние эксперименты, опознают себя в зеркале - тест на самосознание, который успешно проходят лишь немногие из тех, кого мы считаем социально близкими, то есть млекопитающие и птицы.	проходить
кого	kto	кто	1	1	OV	И к тому же они, как показали недавние эксперименты, опознают себя в зеркале - тест на самосознание, который успешно проходят лишь немногие из тех, кого мы считаем социально близкими, то есть млекопитающие и птицы.	считать
Митю	mitja	митя	1	1	OV	"Митю она зовет, - подумал Николай, - а Митя уже насрал на асфальт, кто-нибудь наступит, если по тротуару пойдет.	звать
того	tot	тот	1	0	OV	Повод более чем уважительный: того гляди "во гроб вселимся, идеже вкупе царие и нищии", как поют в церкви.	глядеть
заказы	zakaz	заказ	1	0	OV	Но - человеческий фактор: заказы комплектует специалист ультралевых, коммунистических взглядов - на дух не переносит богатых.	комплектовать
человека	chelovek	человек	1	0	OV	"Пройдемте", - гвардеец делает под козырек, и человека госпитализируют: закон суров, но это закон.	госпитализировать
что	chto	что	1	1	OV	Это все, что я помню о нем.	помнить
деньги	den'gi	деньги	1	0	OV	И вот пришел он однажды в банк - просто деньги потрогать, на наличных деньгах вирус долго живет, особенно на пятитысячных, а там бородатый мужик, клиент банка, сидит, деньги считает и укладывает в портфель-дипломат.	считать
что	chto	что	1	0	OV	Собственно, как и то, что пишет о Гражданской войне, тщательно скрывая, что бежал от большевиков в Киев.	писать
Пенсию	pensija	пенсия	1	1	OV	Пенсию он откладывает, а после его смерти деньги идут на ремонт местной школы.	откладывать
которые	kotoryj	который	1	3	OV	Актриса выступает в госпиталях (которые Паустовский по привычке зовет "лазаретами"), а потом возвращается в дом, где на стенах висят гравюры с броненосцами береговой обороны, а на столе - модель крейсера "Громобой", на котором ходил старый корабельный механик.	звать
который	kotoryj	который	1	1	OV	Вот маленький городок, который по-прежнему засыпает снегом и где год за годом все так же топятся печи.	засыпать
что	chto	что	1	0	OV	И уж подавно не то, что внесет в него другой человек, перебирающий страницы книги.	внести
что	chto	что	1	4	OV	Через минуту после того, как вы спросили: "Как пройти на Дерибасовскую?" - одессит вам расскажет о себе и семье такое, что в Москве вряд ли доверят друзьям и после десяти лет знакомства.	доверить
что	chto	что	1	3	OV	Помню, тогда мы с ним, смеясь, вспомнили закон украинской партийной жизни: что в Москве не любят, в Киеве - ненавидят.	любить
что	chto	что	1	0	OV	Хотя, что значит "внутренне", ничего, кроме этого внутреннего и нет, только нарост на нем - тело, которое укутывают слоями одёжек, суют в рот ложку с чем-то полезным, но противным, для самой себя ничего этого нет.	значить
всё	vse	все	1	0	OV	Но Луна всё меняет.	менять
это	eto	это	1	0	OV	Он стал страдать от одиночества (атомизация это предполагает), депрессии (поскольку психика, не занятая выживанием и не обремененная социальными страхами, становится хрупкой), СДВГ (синдрома дефицита внимания и гиперактивности), и не только у детей, СХУ (синдрома хронической усталости) из-за увеличившихся нагрузок.	предполагать
это	eto	это	1	0	OV	Попытки таких прогнозов предпринимают многие ученые разных стран, и мы, разумеется, это делаем.	делать
что	chto	что	1	0	OV	Но при этом в американском "политическом классе" есть явный дефицит понимания угрозы ядерной войны, ее последствий, что отмечают многие американские ученые.	отмечать
это	eto	это	1	0	OV	Россия это делает в том числе вместе с нашим союзником - Белоруссией.	делать
что-то	chto-to	что-то	1	0	OV	Ты что-то принимаешь?	принимать
плавание	plavanie	плавание	1	4	OV	А плавание ты на всю жизнь запомнишь.	запомнить
что	chto	что	1	1	OV	"А ты что тут делаешь?"	делать
Что	chto	что	1	1	OV	Что тут скажешь… найти третьего врача для проверки не представлялось возможным.	сказать
дорогу	doroga	дорога	1	0	OV	Страшновато, когда дорогу пересекает стадо быков.	пересекать
Христа	Hristos	Христос	1	1	OV	Христа здесь уважают, он считается сыном Крокодила - верховного бога и предка всех тиморцев.	уважать
Крокодила	krokodil	крокодил	1	0	OV	Крокодила называют ласково - дедушка.	называть
Девочек	devochka	девочка	1	0	OV	Девочек приучают с раннего детства, ношение тяжестей делает сексуальнее походку и улучшает осанку - так считают тиморцы.	приучать
который	kotoryj	который	1	1	OV	В доме, который они арендуют.	арендовать
которые	kotoryj	который	1	0	OV	Бывают, как известно, звуки, которые слышишь только изнутри.	слышать
это	eto	это	1	0	OV	И я понимаю, что это пишут люди настрадавшиеся, утратившие веру в то, что может произойти что-то хорошее.	писать
что	chto	что	1	0	OV	"Посмотрите, что с ними происходит, посмотрите, что делают судороги, какая постоянная боль!"	делать
Что	chto	что	1	2	OV	Что вы нам показываете, уберите, на это невозможно смотреть".	показывать
что	chto	что	1	0	OV	У меня в этом году появилась возможность какие-то бумаги подписывать как член Центрального штаба ОНФ, и плевать мне на все, что говорят.	говорить
что	chto	что	1	1	OV	Потому что у нас такой народ, им, что ни сделай"	сделать
что	chto	что	1	1	OV	И на этой фразе я жду стандартное: "Им что ни сделай, им все мало, им все плохо."	сделать
что	chto	что	1	1	OV	И он вдруг говорит: "Им что ни сделай, они все равно тебе благодарны.	сделать
это	eto	это	1	0	OV	Жалеют, наоборот, что мало были с детьми (это говорю я, которая своих детей не видит вообще), жалеют, что расстались из-за каких-то амбиций с мужем или с женой, жалеют, что не жили полной жизнью.	говорить
каждого	kazhdyj	каждый	1	1	OV	Рождаются все с розовой попой и розовыми пятками, рождаются все чудные и каждого мама поцелует.	поцеловать
персонал	personal	персонал	1	1	OV	У оставшихся без денег компаний падает производство, персонал либо сокращают, либо переводят на укороченную неделю.	сокращать
что	chto	что	1	1	OV	- Правда, у него была классная команда экономических советников, с которыми президент встречался каждую неделю и делал то, что они советуют.	советовать
что	chto	что	1	2	OV	Такие деликатные инструменты в условиях всеобщего хаоса откровенно блокируются, что мы и наблюдаем.	наблюдать
Сверхдоход	sverhdohod	сверхдоход	1	1	OV	Сверхдоход власть использует по своему усмотрению.	использовать
возбуждение	vozbuzhdenie	возбуждение	1	0	OV	У Гегеля есть замечательная фраза про людей, которые возбуждение принимают за вдохновение, напряжение за работу, а усталость за результат.	принимать
что	chto	что	1	1	OV	Они хотят потреблять сегодня, что и делают с удовольствием.	делать
налоги	nalog	налог	1	0	OV	И поэтому туда направлять часть доходов нередко предпочтительнее, нежели в банки, где налоги берут.	брать
голову	golova	голова	1	1	OV	Во-вторых, надеемся, что авось кирпич или сосулька голову не пробьют.	пробить
убытки	ubytok	убыток	1	0	OV	Когда риск кредитования долгосрочных проектов с большими сроками окупаемости влачит эмиссионный центр - он же и убытки гасит, печатая все новые и новые деньги.	гасить
который	kotoryj	который	1	1	OV	А это - стабильный рост инфляции, который мы наблюдаем.	наблюдать
что	chto	что	1	1	OV	В 2015 году ожидали утечки $60 - 70 млрд, что власти выдают за огромное достижение.	выдавать
дух	duh	дух	1	0	OV	Нереально офигенное фото,аж дух захватывает ❤️	захватывать
дух	duh	дух	1	0	OV	Нереально офигенное фото,аж дух захватывает ❤️	захватывать
все	vse	всё	1	0	OV	Закатываю больше 500 банок,все съедаем с помощью большого количества друзей и близких.	съедать
все	vse	всё	1	0	OV	И че все седаете	съедать
людей	chelovek	человек	1	0	OV	И да тоже не понимаю такой веры ..все такие хорошие ,но матерятся и людей обсуждают .	обсуждать
это	eto	это	1	0	OV	@screened-187 хорошо, что Вы это осознаете!	осознавать
рыбу	ryba	рыба	1	3	OV	Иногда приманку можно просто волочить по дну, и рыбу такой темп проводки привлекает.	привлекать
лялек	ljal'ka	лялька	1	0	OV	Это девочка, лялек ждет, сразу видно, зоологи от бога 😁😁😁	ждать
никого	nikto	никто	1	1	OV	А никого не смущает что дерево ходуном ходит того и гляди завалиться?!)	смущать
Все	vse	всё	1	0	OV	Все отдаю ветрам И пыли жесткой зною Путь укажу зверям До сердца доберусь что бьется В последнем исступленьи	отдавать
Путь	put'	путь	1	0	OV	Все отдаю ветрам И пыли жесткой зною Путь укажу зверям До сердца доберусь что бьется В последнем исступленьи	указать
Стрелу	strela	стрела	1	0	OV	Стрелу нажму -- польется По пальцам ток мучений	нажать
головы	golova	голова	1	3	OV	Идут пираты в папиросном дыме Ползут индейцы по верхам дерев Но ты им головы как мягкий хлеб Срезаешь ножницами кривыми	срезать
язык	jazyk	язык	1	0	OV	свистит шарабан в нем племянница пасхальным яйцом тянется в богатырские очки язык вложит?	вложить
стенку	stenka	стенка	1	1	OV	а дождик льёт и льёт и стенку это радует	радовать
ухо	uho	ухо	1	0	OV	пять лет продолжается вечер болит бессловесный кадык и ухо сверлит понемногу и нос начинает болеть в ноге наблюдаю миногу в затылке колючки и плеть	сверлить
правду	pravda	правда	1	0	OV	я вам правду расскажу я хожу и не хожу я не это и не то я пальто	рассказать
стекло	steklo	стекло	1	1	OV	стекло морщинится не хочет а он стекло представь щекочет и сам хохочет	щекотать
голову	golova	голова	1	0	OV	жук совсем не постигает что время может быть течёт он жук сидит он жук икает на солнце голову печёт	печь
это	eto	это	1	0	OV	да да да я это знаю правда люди это так вот я с лошади слезаю а земля черна как фрак	знать
фигуры	figura	фигура	1	0	OV	глядите все: цветы стоят на расстояньи деревья мокрые в росе фигуры гнут как девы	гнуть
мысли	mysl'	мысль	1	0	OV	говорил философ Кант: я хотя не музыкант но однако понимаю звуков чудную игру часто мысли вынимаю и гуляю на пиру суп наперченный вкушаю ветчину и рыбу ем	вынимать
тени	ten'	тень	1	0	OV	он сюда придти не может где реальный мир стоит он спокойно тени множит и на небе не блестит	множить
выстрел	vystrel	выстрел	1	0	OV	глядит на тощую пальбу и выстрел ставит он ко лбу и выстрел падает как мяч и попадает в лоб тот выстрел чёрен как палач	ставить
танцы	tanets	танец	1	0	OV	а этот заспанный зефир спокойно нюхает эфир и музыка гремит и лает и человеки танцы пляшут то построений пожелает а кто в гостях на воздух ляжет	плясать
сон	son	сон	1	0	OV	я один я терплю я спокойно сон куплю	купить
телеграмму	telegramma	телеграмма	1	0	OV	И телеграмму принимает: “Не уходи!”	принимать
травы	trava	трава	1	0	OV	Солнце смуглой рукой травы ворошит, В золоченой печи яблоки печет, Каждый лист на ветвях золотом прошит, И река золотой лавою течет.	ворошить
яблоки	jabloko	яблоко	1	0	OV	Солнце смуглой рукой травы ворошит, В золоченой печи яблоки печет, Каждый лист на ветвях золотом прошит, И река золотой лавою течет.	печь
оригинальный	original'nyj	оригинальный	1	0	OV	Яблочники, когда у вас юсб-шнур умирает, вы оригинальный покупаете или нет	покупать
что	chto	что	1	0	OV	А что скажет Явлинский, нужна ли ему порядочность подмосковного Яблока	сказать
воду	voda	вода	1	0	OV	@Zhirinovskiy ни чего он не решает просто воду наливает	наливать
корки	korka	корка	1	0	OV	Затем мы корки моем, счищаем зеленую кожицу.	мыть
печеньки	pechen'ka	печенька	1	0	OV	3. Потом баба-мышка-нарушка - сидит, никого не трогает, чё то там печеньки точит, перед ней уже сотня мам зашла без очереди, а она и не возникает: - Я пройду?	точить
Ноги	noga	нога	1	0	OV	Ноги вырву, так бегать будешь!!!	вырвать
прививки	privivka	прививка	1	0	OV	А вот ещё вопрос, вы прививки ставите?...	ставить
сироп	sirop	сироп	1	0	OV	Помешивая, сироп доводят до кипения.	доводить
Сахар	sahar	сахар	1	0	OV	Сахар заливают водой (полстакана) и нагревают до растворения сахарных крупинок; растворенный сироп доводят до кипения, на оставшемся количестве воды (полстакана) варят кофе, который ставят на край плиты для настоя.	заливать
который	kotoryj	который	1	0	OV	Сахар заливают водой (полстакана) и нагревают до растворения сахарных крупинок; растворенный сироп доводят до кипения, на оставшемся количестве воды (полстакана) варят кофе, который ставят на край плиты для настоя.	ставить
вознаграждение	voznagrazhdenie	вознаграждение	1	0	OV	Паспорт был потерян в С-пб, перешлите пожалуйста своим друзьям мое обращение, может всплывет где нибудь, вознаграждение гарантирую...	гарантировать
щечки	schechka	щечка	1	1	OV	- Показать как котенок дует на молочко (дуем широкий язык, зажатый между зубов, щечки не надуваем);	надувать
Упражнение	uprazhnenie	упражнение	1	0	OV	Упражнение выполните 3 раза по 7 секунд..	выполнить
что	chto	что	1	1	OV	И следят буквально за всем: что вы делаете, где вы находитесь и что вы говорите.	делать
что	chto	что	1	1	OV	И следят буквально за всем: что вы делаете, где вы находитесь и что вы говорите.	говорить
что	chto	что	1	2	OV	Тебе показать что о тебе думает жириновский и путин	думать
награды	nagrada	награда	1	0	OV	Нас партия пестует и вдохновляет, За послушанье награды кидает, А если развалятся единороссы Покинут страну и родные берёзы!	кидать
Историю	istorija	история	1	0	OV	Историю подучите, хромает она у вас.	подучить
кладез	kladez'	кладезь	1	2	OV	И кладез под пальмою видит он вдруг.	видеть
кого-то	kto-to	кто-то	1	0	OV	И он кого-то прижимает к больной груди.	прижимать
которых	kotoryj	который	1	1	OV	партия ПАРНАС - СБОРИЩЕ пиндоских проституток, которых не желают даже ДАРОМ	желать
мероприятие	meroprijatie	мероприятие	1	0	OV	@xxxxxxx а чего тебе надо Для тебя вон вечером сегодня парнас мероприятие делает	делать
горби	Gorbi	Горби	1	0	OV	@Zhirinovskiy На рассее горби считают предателем.	считать
все	vse	всё	1	0	OV	они там бесплатно все делают.	делать
что	chto	что	1	0	OV	Пиши что хочешь...врать ведь всегда легче чем доискиваться правды.	хотеть
это	eto	это	1	0	OV	Я это делаю крупными кубиками.	делать
которых	kotoryj	который	1	1	OV	А кто не был, просто почитайте - тут список основных типов женщин-мам, которых далее зовём бабой для юмора:	звать
мочу	mocha	моча	1	0	OV	Я тогда сбегаю ещё мочу отнесу.	отнести
книжку	knizhka	книжка	1	0	OV	8. Противостоит ей мне-пох-баба, ребёнок только об стену не долбиться, а она сидит книжку читает.	читать
голову	golova	голова	1	0	OV	10. Ах, да... Есть такой экземпляр, как чёткая-баба, сама красивая, ребёнок красивый, сидит у мамы на коленях, не рыпается, она ему тихо голову гладит, вот и очередь их быстро подошла, и они довольные выходят из кабинета, и она такая: - Роберт, а пошли в парк, я тебе мороженку куплю.	гладить
мороженку	morozhenka	мороженка	1	0	OV	10. Ах, да... Есть такой экземпляр, как чёткая-баба, сама красивая, ребёнок красивый, сидит у мамы на коленях, не рыпается, она ему тихо голову гладит, вот и очередь их быстро подошла, и они довольные выходят из кабинета, и она такая: - Роберт, а пошли в парк, я тебе мороженку куплю.	купить
кофе	kofe	кофе	1	0	OV	Через 15—20 минут кофе процеживают и чистый кофейный настой вливают вместе с коньяком в сахарный сироп, который тщательно размешивают и охлаждают.	процеживать
Подбородок	podborodok	подбородок	1	0	OV	1. Подбородок опустите к шее.	опустить
которые	kotoryj	который	1	2	OV	P.S. О быте и культуре рабочего класса в книге тоже есть чудесные свидетельства, которые я как-нибудь выложу.	выложить
что	chto	что	1	1	OV	Причина половины наших жизненных ошибок в том, что мы чувствуем там, где нужно думать.	чувствовать
Зюганова	Zjuganov	Зюганов	1	0	OV	Один мой знакомый в экстазе и от того, и от другого (а Зюганова считает тюфяком).	считать
бочки	bochka	бочка	1	3	OV	Целый космодром отгрохали, олимпиаду в Сочи провели, влезли своими клешнями в Грузию, Приднестровье, Украину, Сирию, через Каспий ракетами херячили...; бочки над натовским кораблями крутим - во крутизна, не правда ли	крутить
историю	istorija	история	1	0	OV	Ты иди историю учи.	учить
Гиркина	Girkin	Гиркин	1	1	OV	Гиркина особенно рекомендую.	рекомендовать
песни	pesnja	песня	1	0	OV	Только мы дружно ставим рекорды и молотим, и сеем, и жнем, и берем на гитарах аккорды, и про Путина песни поем.	петь
Кого	kto	кто	1	0	OV	Кого гонят, это та самая масса, которая даёт голоса для победы ЕР.	гнать
это	eto	это	1	0	OV	Уверена, Бог это увидит и поймет всю глубину ее жертвы.	увидеть
это	eto	это	1	0	OV	Возрадуйтесь с ним, как это делаю я !	делать
свечу	svecha	свеча	1	0	OV	дай-как, я свечу задую...	задуть
голову	golova	голова	1	0	OV	тяжесть темного узла, скок упругого козла -- закружились, забодались круторогие огни, диких глаз промчались дали -- ниже голову нагни!	нагнуть
икону	ikona	икона	1	0	OV	и икону держит стая чуть колышемых стрекоз, синий блещущий оклад, под водою слышен клад, слышно пение и звуки, как в тоске ломают руки, как баюкает вода древних раковин года.	держать
лед	led	лед	1	0	OV	Призрак родился, призрак умрет Остановится и лед разобьет Это причуды Зачем вам знать Солнце Иуды Зачем вставать Истина, скройся Не в силах вынести Тихо закройтесь Глаза пустыни Зачем тревожишь Сирени сон Понять не сможет Иуду он Иуду чуда Звездного блуда Предательство вечного Каждого встречного.	разбить
cвечу	svecha	свеча	1	2	OV	За то ль, cкажи, мы любим cвет cвечи (cвечу cвеpканью люcтp пpедпочитаем), что жеpтвует cобой она в ночи, когда пpи ней о пpавде мы читаем?	предпочитать
жизнь	zhizn'	жизнь	1	0	OV	- Эти весны нам принадлежат, -- Я легкое отдал, я жизнь отдам, Не оборачиваясь назад...	отдать
Моряков	morjak	моряк	1	1	OV	Слов так много у нас в неволе, Птиц, попавших в ловушку совью, Моряков я люблю за соль их Небылиц, разбавленных кровью.	любить
ездока	ezdok	ездок	1	0	OV	И в выси, откуда Солнце чуть видимо, как роса, Конь ездока возносит на Первые Небеса.	возносить
лавры	lavr	лавр	1	0	OV	Блаженствуй, но в часы свободы, вдохновенья Беседуй с музами, пиши стихотворенья, Словесность русскую, язык обогащай И вечно с миртами ты лавры съединяй.	съединять
души	dusha	душа	1	0	OV	У Дародателя людей Испросим к подвигам терпенья, Надеждой души оживём, Доколе в вечные селенья Душой свободной не взойдем.	ожить
Стража	strazh	страж	1	0	OV	Шепчут деревья над юртами, Стража окликает страж, -- Вещий голос сонным слышится С родины святой.	окликать
что	chto	что	1	1	OV	Они и так делают всё, что им скажут.	сказать
что	chto	что	1	1	OV	За бабки то что не сделаешь?	сделать
это	eto	это	1	0	OV	"Давай" - соглашается Кира, - "а я это сфотографирую и продам в журнал "ОК!"".	сфотографировать
что	chto	что	1	1	OV	Всё, что ты захочешь, мы разделим пополам, Я тебя нашла и больше никому не отдам.	захотеть
слезы	sleza	слеза	1	0	OV	И слезы утрет, и подставит плечо.	утереть
которых	kotoryj	который	1	2	OV	Я тот тип девушек, которые молчат в больших компаниях или рядом с людьми, которых я не знаю; вы можете увидеть меня настоящую, только если мы близки.	знать
женщину	zhenschina	женщина	1	1	OV	а я с высот не поэтичной лирики и без налета умственных глубин скажу: чем меньше женщину вы любите,	любить
что	chto	что	1	2	OV	А что в окне видишь ты?)	видеть
Юбилей	jubilej	юбилей	1	1	OV	Юбилей театр встречает с художественным руководителем Михаилом Ульяновым, но без главного режиссера.	встречать
лифчик	lifchik	лифчик	1	2	OV	Он сел на кровати и, сурово посмотрев на Катю, объявил:— А лифчик я не надену!	надеть
что-нибудь	chto-nibud'	что-нибудь	1	0	OV	Завтра Ирина возьмет за свой счет, а потом мы что-нибудь придумаем.	придумать
фриков	frik	фрик	1	0	OV	ага, и я, там фриков показывают))	показывать
промо	promo	промо	1	0	OV	Я всегда промо проверяю, вдруг единороссы какие посягнут)	проверять
книжки	knizhka	книжка	1	0	OV	Успешный проект, привлекающий к себе много внимания, респект, ничо не скажу, надеюсь копеечка с реклам капает неплохая, плюс книжки пишет.	писать
привет	privet	привет	1	0	OV	мото санчо привет передавай	передавать
что	chto	что	1	0	OV	Другую нянечку Пулька посылал наблюдать, что делают остальные малыши, и докладывать ему по три раза в день: утром, в обед и вечером.	делать
что	chto	что	1	1	OV	Твой дух живый взнесется, И то, что тлен рассыплет в персть, Из персти паки воззовется Во славу, в вечну честь!»	рассыпать
что	chto	что	1	1	OV	А сейчас почти все, что я готовлю, не ест (только творог остался и овсяная каша утром), и новые блюда отказывается пробовать!	готовить
что	chto	что	1	0	OV	Так как все что съедает, выходит обратно.	съедать
пищу	pischa	пища	1	1	OV	Ощущение, что соли полный рот или что съела что-то очень соленое, хотя я не потребляю соли больше нормы, по мнению мужа пищу постоянно недосаливаю.	недосаливать
первые	pervyj	первый	1	0	OV	Здраствуйте мой малыш 3 года не хочет кушать вторые блюда жевать он может первые кушает если их подавить кушает печенье хлеб яблоки йогурты и кашу с бутылки что мне делать	кушать
Препарат	preparat	препарат	1	0	OV	Препарат принимают до еды, другой способ приема снижает эффективность лекарства.	принимать
бешенство	beshenstvo	бешенство	1	1	OV	Пишут, что белки бешенство не переносят, но как-то в это слабо верится.	переносить
майонез	majonez	майонез	1	2	OV	Замечу что питаюсь я довольно здорово - ничего жареного на масле, ничего жирного, копченого, майонез я не ем, стараюсь есть больше фруктов и овощей, единственное - позволяю себе есть сладкое, как правило до 13 дня и умеренно.	есть
что-то	chto-to	что-то	1	2	OV	Может я что-то не так делаю?	делать
это	eto	это	1	0	OV	Возможно, Вы не измельчаете овощи так тщательно, как это делают производители детского питания или в супе присутствуют грубые волокна.	делать
литр	litr	литр	1	2	OV	Пьет очень много воды(сок, компот, чай) литр за сутки выпивает.	выпивать
Это	eto	это	1	1	OV	Это мы понимаем, а вот как исправить эту ситуацию, никто подсказать не может.	понимать
что	chto	что	1	0	OV	И еще хотел спросить по поводу ФГС, может ли быть такое что один доктор не видит что видит другой.	видеть
боли	bol'	боль	1	0	OV	Из того, что можно сделать сейчас, соблюдать щадящую диету, пить побольше воды, не использовать никаких необязательных лекарств (ни НПВС, ни антибиотиков, ни чего-либо еще), боли снимайте пока спазмолитиками (дюспаталин, метеоспазмил, но-шпа).	снимать
сто	chto	что	1	3	OV	Здравствуйте, то сто вы про себя пишете похоже на реакцию на какую то травму- если про психологию думать, или на нарушение физического здоровья- может какая скрытая болезнь или инфекция?	писать
Церукал	tserukal	церукал	1	0	OV	Церукал колю 1 раз в день.	колоть
время	vremja	время	1	2	OV	Часто меняют магазинчики местами, время у людей отнимают	отнимать
все	vse	всё	1	0	OV	Отличный магазин, все рекомендую.	рекомендовать
Что	chto	что	1	2	OV	Что тут ещё скажешь?	сказать
Жукова	Zhukov	Жуков	1	0	OV	Жукова посмотрите по Катынскому делу...	посмотреть
нос	nos	нос	1	0	OV	Помню наши кричалки в 80-х на играх в доме спорта - "Урал конечно не Москва, но нос утрем мы ЦСКА" и "Уралочка давай быстрей!	утереть
фотки	fotka	фотка	1	0	OV	Надеюсь фотки пропустят...	пропустить
что	chto	что	1	0	OV	Сейчас иногда бываю, вспоминаю прекрасных преподавателей Элеонору Ильиничну Афанасиади, Декана нашего Станислава Густавовича Дубейковского - "Ребята не за то вас ругаю что выпиваете, а за то что плохо закусываете".	выпивать
все	vse	всё	1	0	OV	В Самарканде добрейший народ, говорят по русски все покажут, все расскажут.	показать
все	vse	всё	1	0	OV	В Самарканде добрейший народ, говорят по русски все покажут, все расскажут.	рассказать
Заказы	zakaz	заказ	1	0	OV	Заказы обрабатывают быстро.	обрабатывать
никого	nikto	никто	1	1	OV	А уникальные экспонаты Оружейной палаты никого не оставят равнодушным!	оставить
которые	kotoryj	который	1	0	OV	Невозможно передать словами те чувства, которые испытываешь при осмотре этого памятника: и потрясение, и скорбь, и гордость.	испытывать
всех	vse	все	1	0	OV	Но по факту всех впихивают в живую очередь.	впихивать
Всё	vse	всё	1	0	OV	Всё устраивает.	устраивать
что	chto	что	1	1	OV	Как раз то, что я люблю👍	любить
Пиццу	pitstsa	пицца	1	0	OV	Пиццу люблю, суши не очень.	любить
что	chto	что	1	1	OV	Ну что вы хотите от гостиницы без звёзд, в которой имеется всего 2 номера?	хотеть
гренки	grenki	гренки	1	2	OV	А гренки к нему жарят тут же, при тебе - пальчики оближешь и зубы не сломаешь.	жарить
пальчики	pal'chik	пальчик	1	0	OV	А гренки к нему жарят тут же, при тебе - пальчики оближешь и зубы не сломаешь.	облизать
зубы	zub	зуб	1	1	OV	А гренки к нему жарят тут же, при тебе - пальчики оближешь и зубы не сломаешь.	сломать
Всё	vse	всё	1	0	OV	Всё устраивает.	устраивать
все	vse	всё	1	0	OV	И сотрудники-профессионалы, и быстро решают проблемы,если сотрудничество долгосрочное,по удаленке все сделают.	сделать
всех	vse	все	1	0	OV	Район небольшой,все всех знают.	знать
че	che	че	1	0	OV	Назвать нужно "Заходи бери че хочешь" Есть выбор,всегда свежачок.	хотеть
что	chto	что	1	0	OV	Продавцы знают постоянных покупателей,кто что покупает	покупать
Грузы	gruz	груз	1	0	OV	Грузы доставляют по всем КМВ.	доставлять
которые	kotoryj	который	1	0	OV	Часто проходят музыкальные вечера,которые посещает масса поклонников романсов,оперетты.	посещать
пальчики	pal'chik	пальчик	1	0	OV	Дессерты,вкусный кофе, а блинчики...... пальчики оближешь.	облизать
монетки	monetka	монетка	1	0	OV	Ему в шляпу до сих пор монетки кидают....	кидать
Еартину	kartina	картина	1	0	OV	Еартину дополняют множество гротов .	дополнять
что	chto	что	1	0	OV	Я рада что живу в Пятигорске	жить
все	vse	всё	1	0	OV	Пользуюсь им уже два с половиной года, все устраивает, обмана нет.	устраивать
все	vse	всё	1	0	OV	Бывал там, все устраивает, машину моют хорошо, и магазин приличный.	устраивать
машину	mashina	машина	1	0	OV	Бывал там, все устраивает, машину моют хорошо, и магазин приличный.	мыть
Все	vse	всё	1	0	OV	Все устраивает!!!	устраивать
все	vse	всё	1	0	OV	Всегда там заказываю лекарства, по мере необходимости, все устраивает.	устраивать
все	vse	всё	1	0	OV	Бываю там, хорошее кафе, все устраивает!!!	устраивать
Жену	zhena	жена	1	1	OV	Жену все устраивает, ей нравится.	устраивать
все	vse	всё	1	0	OV	Ребёнку там все покупаем, нас все, даже очень, все устраивает.	покупать
все	vse	всё	1	0	OV	Неплохое агентство, пользуюсь, все устраивает.	устраивать
Все	vse	всё	1	0	OV	Все устраивает, не смотря на то, что приходится три раза в день на автобусе ездить в главный корпус на питание.	устраивать
все	vse	всё	1	0	OV	Бываю там, все устраивает, но цены не реально завышены, впрочем, как и везде.	устраивать
что	chto	что	1	0	OV	Хороший торговый центр , где каждый найдёт всё что хочет себе по вкусу	хотеть
Внучку	vnuchka	внучка	1	2	OV	Внучку на плавание вожу	водить
копии	kopija	копия	1	1	OV	Минус: при сдаче документов копии не делают, то есть должна сама где-то отсветить , все предусмотреть.	делать
это	eto	это	1	0	OV	Как будто специально это делают.	делать
всё	vse	всё	1	0	OV	Молодые спокойные красивые всё расскажут помогут.	рассказать
ум	um	ум	1	0	OV	Кухня вкусная, выпечка вообще ум отьешь.	отъесть
Внуков	vnuk	внук	1	0	OV	Внуков поведу именно в эту школу .	повести
цены	tsena	цена	1	0	OV	Вечно цены поднимают.	поднимать
все	vse	всё	1	0	OV	Консультанты очень грамотные и все подскажут помогут.	подсказать
, что-то	chto-to	что-то	1	0	OV	Захожу в ТЦ, что-то куплю, наверх с сумками не хочется идти.	купить
Актёров	akter	актер	1	0	OV	Актёров знаю, а режиссеров - нет.	знать
всё	vse	всё	1	1	OV	Видимо у клиентов много вопросов, а сотрудники всё тактично объясняют.	объяснять
всё	vse	всё	1	0	OV	Далеко от моего дома, а остальное всё устраивает.	устраивать
Всё	vse	всё	1	0	OV	Всё устраивает.	устраивать
заказ	zakaz	заказ	1	0	OV	Чаще всего заказ делаю по этому адресу.	делать
Всё	vse	всё	1	0	OV	Всё устраивает.	устраивать
клумбы	klumba	клумба	1	0	OV	Ухоженный сад (Горзеленхоз в первую очередь тут и перед Горсоветом работает), летом регулярно клумбы высаживают.	высаживать
окна	okno	окно	1	2	OV	Не нравится то, что часто организуют поборы с родителей "на шторы", нет нормального штатного дворника, из-за чего "просят" родителей снег зимой почистить, еще родители окна на зиму затыкают и делают другую работу, которую не должны делать.	затыкать
Скидки	skidka	скидка	1	1	OV	Скидки тоже дают обычно на товары с истекающим сроком годности, будьте внимательны!	давать
Деньги	den'gi	деньги	1	1	OV	Деньги не дерут, как в других школах.	драть
все	vse	всё	1	0	OV	Если не знаешь куда обратиться, иди в мфц, там все расскажут и помогут.	рассказать
Фуры	fura	фура	1	0	OV	Фуры используют как склад на колесах.	использовать
День	den'	день	1	0	OV	День выкинь из жизни.	выкинуть
золото	zoloto	золото	1	1	OV	Там сотрудники добрые и внимательные словно им золото килограммами отвешивают, за каждого посетителя.	отвешивать
что	chto	что	1	0	OV	Почти всегда найдёшь то, что ищешь.	искать
вопросы	vopros	вопрос	1	0	OV	По факту проблем с ними нет, вопросы решают успешно, очереди не большие.	решать
заказ	zakaz	заказ	1	0	OV	Здесь всё сделано для повышения проходимости: самообслуживание, открытые витрины с напитками, пластиковые бокалы для вина, заказ пишешь на специально отпечатанных меню, оплачиваешь в кассе, забираешь на открытой кухне.	писать
дочу	docha	доча	1	2	OV	На следующий год дочу сюда же отдам.	отдать
которых	kotoryj	который	1	1	OV	Однако есть несколько врачей и мед.сестер,которых очень уважаю.	уважать
тоску	toska	тоска	1	0	OV	Помещение темное угнетающее, стены в коридоре вообще тоску наводят.	наводить
Дочку	dochka	дочка	1	1	OV	Дочку тоже поведу со временем.	повести
Ребенка	rebenok	ребенок	1	1	OV	Ребенка не объедаю,а вот мужу беру фруктовый,что доесть свой карамелевый и забрать его)))	объедать
деньги	den'gi	деньги	1	0	OV	Нас попросили написать заявление и на следующий день пришло оповещение,что данный заказ аннулирован и в течении 5 дней деньги вернут на карту.	вернуть
Инструктора	instruktor	инструктор	1	2	OV	Инструктора все подробно объясняют.	объяснять
русских	russkij	русский	1	1	OV	Там трудятся узбеки, русских не берут на работу мол стажа нет, смешно.	брать
всё	vse	всё	1	0	OV	Только один субект там всё портит, и это Константиновна.	портить
Всё	vse	всё	1	0	OV	Всё устраивает.	устраивать
полотенца	polotentse	полотенце	1	0	OV	Уборка в номерах длительная, полотенца меняют неохотно...	менять
всё	vse	всё	1	0	OV	который САМ приходит и всё путает и раскладывает!!!	путать
бумаги	bumaga	бумага	1	3	OV	Только с товаром не знаешь к кому подойти, кто работает, а кто бумаги "в комп вбивает".	вбивать
кого	kto	кто	1	0	OV	Кто кого пропускает?	пропускать
слепого	slepoj	слепой	1	0	OV	яндекс вы слепого отправляете на точке?	отправлять
страховку	strahovka	страховка	1	4	OV	страховку без тех осмотра не делают и дорого ....	делать
билет	bilet	билет	1	0	OV	( Через турникет прошёл и в ласточке билет читаем).	читать
Всё	vse	всё	1	0	OV	Всё объяснят и посоветуют.	объяснить
пьющих	p'juschij	пьющий	1	0	OV	Не пью и пьющих презераю😉	презирать
билеты	bilet	билет	1	0	OV	Единственная больница в Туре, врачей конечно не хватает, если проблема в лечении, могут отправить в Красноярск к конкретному врачу, билеты оплачивают в основном по факту, это очень хорошо, что есть такая возможность, такая программа только для жителей	оплачивать
такси	taksi	такси	1	1	OV	Не нравится стройка перед 42 домом, весь вид закроет, и куда машины будут парковать новые соседи с Снегирей, и из за этой стройки закрыли удобный проход к остановке "Библиотека Жар птица", приходится делать большой круг, чтобы попасть на остановку, а у меня мама еле ходит, бывает такси даже отказывают в приезде на солнечный, так ей приходится ходить на автобусную остановку "Снегири" , машины у на…	отказывать
кого-то	kto-to	кто-то	1	1	OV	И видел ли хоть кто-то, что кого-то не пускают из-за температуры?	пускать
что	chto	что	1	1	OV	нужна интересная задумка " что я сделаю на Северном полюсе (Арктике)" накидайте как можно больше интересных и креативных вариантов.	сделать
Чартеры	charter	чартер	1	0	OV	Чартеры ставят на массовые пляжные направления	ставить
Что	chto	что	1	2	OV	Что вы обычно берёте с собой в походы?	брать
паспорт	pasport	паспорт	1	4	OV	Скажите, присылают ли фото паспорта во время его замены??? мне нужно отправить данные паспорта через 4 дня (( а паспорт к этому времени не сделают	сделать
Оригинал	original	оригинал	1	1	OV	Оригинал не хочу носить	хотеть
это	eto	это	1	0	OV	Мои родители постоянно мне это говорят, что я проживу тут всю жизнь, работая за эти деньги.	говорить
что	chto	что	1	0	OV	4. что делают жители в свободное время.	делать
это	eto	это	1	0	OV	Так зачем скауты это делают?	делать
это	eto	это	1	0	OV	Для чего же они тогда это делают?	делать
Что	chto	что	1	1	OV	Что вы хотите читеры! от роблокас	хотеть
кресты	krest	крест	1	1	OV	Вроде где попало кресты не ставят, а здесь как то непонятно	ставить
Что	chto	что	1	0	OV	Что означает эта картина?	означать
человека	chelovek	человек	1	2	OV	И как не крути вода человека всё равно выкинет в верх на поверхность это 100% потому что я сам плавал купался в Южной Америке и там были большие волны и меня швыряло и кидало но я живой.	выкинуть
язык	jazyk	язык	1	1	OV	В тик-ток смотрю онлайн трансляцию в польском регионе, но язык не понимаю, подскажите есть ли софт для перевода в режиме онлайн, поток комментариев на польском языке ?	понимать
это	eto	это	1	1	OV	Но в каком парке было это Событие в 1997-м году, это я знаю, где оно было, оно было в Голосеевском парке, в голосеевком парке лес тама большой, он виден на фотке за спиной Психа 1989г. р.	знать
Что	chto	что	1	0	OV	Что посоветуете? как создать шаблон, чтоб быстрее клипать видео для тик-ток ?	посоветовать
Что	chto	что	1	0	OV	Что означает тату на ребре ладони три точки ???три точки в ряд	означать
Что	chto	что	1	0	OV	Что значит ДЕЛАТЬ ЭТО?	значить
который	kotoryj	который	1	0	OV	Хочу узнать, Tavor CTAR который называют Commando является штурмовой винтовкой с укороченным стволом?	называть
ответ	otvet	ответ	1	0	OV	При обработке необходимо учесть аккуратный способ соединения начала и конца бейки, поэтому ответ дайте в метрах, с точностью до ближайших десяти сантиметров в сторону увеличения.	дать
Ответ	otvet	ответ	1	0	OV	Ответ запишите в метрах, округлив до одного знака после запятой	записать
Что	chto	что	1	0	OV	Что посоветуйте им подарить?	посоветовать
Что	chto	что	1	0	OV	Что значит ДЕЛАТЬ ЭТО?	значить
Которых	kotoryj	который	1	0	OV	Которых показыват по ТВ или пишут в газетах и интернете	показывать
которое	kotoryj	который	1	0	OV	Средство брызгалки или которое втыкают в разетку и могут ли липучки от мух их убить?	втыкать
чё	che	че	1	0	OV	Я тут насос взял и обнимаю, а вы чё делаете?)	делать
чушь	chush'	чушь	1	1	OV	Пишите по делу, чушь не пишите	писать
что	chto	что	1	0	OV	Хотела бы взять паука птицееда с собой в контейнере, а кормить бабочками, мотыльками, кузнечиками, мухами, ну что найду.	найти
маленьких	malen'kij	маленький	1	1	OV	Решила подарить подруге значок, вышитый крестиком Где взять схему, больших в интернете полно, а маленьких не вижу И какую канву взять?	видеть
Что	chto	что	1	0	OV	Что означают клетки с ножами в игре?	означать
все	vse	всё	1	0	OV	Это можно проверить по сайту или все узнаешь только на интервью, когда денег уже много заплачено?	узнать
руки	ruka	рука	1	1	OV	На площадке они явно руки не помоют.	помыть
Фото	foto	фото	1	0	OV	Фото прилагаю.	прилагать
это	eto	это	1	0	OV	Может быть кто-т это знает, как включить горячую воду?)	знать
который	kotoryj	который	1	3	OV	Я не хочу сказать, что я Мегамозг, но дело в то что моя одногруппница не особо блещет умом хотя родители сами водили и таскали ее на всякие кружки... танцы, музыкалка, худ. шк, вокал, спортивные кружки, на англ (который она вообще не знает)....	знать
Что	chto	что	1	1	OV	Что это значит по научному объяснению?	значить
Исключение	iskljuchenie	исключение	1	0	OV	Исключение составляют только Филёвская и Бутовская линии метро в Москве.	составлять
это	eto	это	1	0	OV	Они научила кричать что сама это сделает, я не стала возрожать.	сделать
это	eto	это	1	3	OV	Мама заступидачь за меня сказала что бы она не несла чушь и не кричала, сестра начала ОПЯТЬ кричать: вот ты это своей доченьке средней скажи ( я средняя).	сказать
мать	mat'	мать	1	0	OV	На какой сам сядешь, на какой мать посадишь?	посадить
правду	pravda	правда	1	2	OV	Наверное еще и обижаетесь когда правду в лицо говорят И детей своих к тому же приучаете?	говорить
детей	rebenok	ребенок	1	4	OV	Наверное еще и обижаетесь когда правду в лицо говорят И детей своих к тому же приучаете?	приучать
собаку	sobaka	собака	1	0	OV	Подскажите пожалуйста, какие команды щенок должен знать в этом возрасте и как им обучать? (живем в городе в квартире, собаку берем как друга и защитника, берем девочку.	брать
причины	prichina	причина	1	4	OV	За что? спросите вы, но причины и я сам не знаю.	знать
Что	chto	что	1	1	OV	Парни, Что вы подразумеваете под «встречаться»?	подразумевать
Что	chto	что	1	1	OV	Что это значит?	значить
Что	chto	что	1	1	OV	Что вы думаете на счет моего мышления?	думать
Одежду	odezhda	одежда	1	2	OV	Одежду толком не погупает, в секонд возит... на телефон ни разу денежку не положила!	покупать
которого	kotoryj	который	1	1	OV	Теперь хочу спросить тут, не знакомый человек, которого не видишь может и честнее ответит.	видеть
что	chto	что	1	0	OV	Все вещи уже убрали куда подальше наверх, хватает все, что видит, а если отнимаешь, начинает истерить и кидаться всем, что попадет ему под руку.	видеть
всё	vse	всё	1	0	OV	У меня есть одноклассница, которая учится лучше меня, при этом, никогда не учит материалы к урокам, тем временем я, которая всё учит, старается, учусь хуже неё.	учить
что	chto	что	1	1	OV	Мужчины, что вы чувствуете когда узнаете что перед вами стоит девственница?	чувствовать
все	vse	всё	1	0	OV	Когда я поставлю метку о владении ивритом, то моя страница будет круче выглядеть, однако я ещё не настолько хорошо понимаю иврит, однако быстро все усваиваю.	усваивать
супруга	suprug	супруг	1	0	OV	В финале супруга выпускают, он гонется за главной героиней, после сего показывают кадры магазинчика, в котором работает взломщик, камера переключается на его лицо, лучащееся улыбкой.	выпускать
Что	chto	что	1	1	OV	Что вы знаете и думаете об этом?	знать
Парней	paren'	парень	1	1	OV	Парней не слушают, делают всё как они хотят и тратят не свои деньги на всякое барахло.	слушать
стиралку	stiralka	стиралка	1	0	OV	Ребята сантехники помогите решить такой вопрос, 2 раковины в один слив подключены под землей, когда сливаешь раковину или стиралка, то бежив вода ти-по перелив не успевае убежать то-ли создается давление, в плане ситралки да давлением давит, но итог один бежив вода на рисунке показал как примерно и что, когда стиралку отключаю и верх дырка свободная то свободно все сливается от раковин и успевает…	отключать
глаза	glaz	глаз	1	1	OV	он не всает на задние лапы убегает когда его берут на руки и глаза не закрывает это нормально?	закрывать
связь	svjaz'	связь	1	1	OV	Общаемся с парнем уже полтора года, узнала что есть другая, ей она дарит цветы и тд, со мной в хорошем общении гуляет берет к своим друзьям, всем про меня рассказывает, помогает если нужно, ей той девушке дарит цветы с ней он общается больше меня, она была и до меня, мне говорит что она ему по работе с документами помогала и вообще сделала для него многое, недавно когда он предложил мне встречать…	терять
цветы	tsvetok	цветок	1	0	OV	Общаемся с парнем уже полтора года, узнала что есть другая, ей она дарит цветы и тд, со мной в хорошем общении гуляет берет к своим друзьям, всем про меня рассказывает, помогает если нужно, ей той девушке дарит цветы с ней он общается больше меня, она была и до меня, мне говорит что она ему по работе с документами помогала и вообще сделала для него многое, недавно когда он предложил мне встречать…	дарить
все	vse	всё	1	0	OV	Общаемся с парнем уже полтора года, узнала что есть другая, ей она дарит цветы и тд, со мной в хорошем общении гуляет берет к своим друзьям, всем про меня рассказывает, помогает если нужно, ей той девушке дарит цветы с ней он общается больше меня, она была и до меня, мне говорит что она ему по работе с документами помогала и вообще сделала для него многое, недавно когда он предложил мне встречать…	знать
кота	kot	кот	1	0	OV	Сейчас же нам это надоело и кота держим на балконе ибо вся хата пропиталась запахом кошачей мочи и это ужас.	держать
Что	chto	что	1	1	OV	Что это значит?	значить
что	chto	что	1	0	OV	Но лучше выберу то, что предпочтет большинство.	предпочесть
людей	chelovek	человек	1	0	OV	Когда Глухарёв вступил в драку с Карповым в последней серии, то Глухарёв задал ему вопрос, "тебя что в детстве обделили что-ли или били, что ты так людей ненавидишь?	ненавидеть
детей	rebenok	ребенок	1	0	OV	Изменяют расстаются потом трахаются долгое время с другими детей рожают ни как с тобой не общаются но при этом твой телефон они не удаляют.	рожать
парня	paren'	парень	1	0	OV	На что он мне заявил еще более абсурдное заявление "Воот у тебя парня УВОДЯТ а ты вместо того, чтоб доказать что лучше, делаешь ноги, для этого же ничего делать не нужно.	уводить
что	chto	что	1	1	OV	купила пуховик поэлистер био пух что это означает и стирать нельзя что ль кто носит вещи стакой маркой астрида поделитесь своим мнением продувать небудет	означать
которого	kotoryj	который	1	0	OV	Потом узнала что они сговорились чтобы меня отвадить от того парня которого люблю .	любить
Все	vse	всё	1	0	OV	Все принимаю близко к сердцу.	принимать
Квартиру	kvartira	квартира	1	0	OV	Квартиру снимаю по финансам.	снимать
которые	kotoryj	который	1	2	OV	Микробы же просачиваются через ткани не хуже дыхательных путей, которые сам нос фильтрует.	фильтровать
веселье	vesel'e	веселье	1	1	OV	И веселье мы устроим, Так как праздник ваш пришёл!	устроить
что	chto	что	1	0	OV	Ну что поделаешь тут, ушла так ушла, я препятствовать не буду., могла бы и раньше сказать.	поделать
Что	chto	что	1	1	OV	Что это значит и почему это так?	значить
что	chto	что	1	0	OV	Никто не может знать что чувствует кот.	чувствовать
это	eto	это	1	0	OV	Пожалуйста не пишите купите новую, я и так это знаю, просто есть время и хочется поковыряться в ней.	знать
что	chto	что	1	1	OV	Давал многое из того что я покупал брату, занимал ему много раз деньги, но взамен брал или то что он купит (из еды только) ну и жил +- по правилам общаги.	купить
Сооружение	sooruzhenie	сооружение	1	0	OV	Сооружение покажите и расскажите о нем интересно, пожалуйста.	показать
что	chto	что	1	0	OV	Это всё что помню... там вроде у них есть дом-грузовик вроде (не точно), ПОМОГИТЕ ПЛЗ ОЧЕНЬ ПРОШУУУУ	помнить
Четырёхстенку	chetyrehstenka	четырехстенка	1	0	OV	Четырёхстенку знаю, пятистенку знаю, а это кто знает, что это такое.	знать
пятистенку	pjatistenka	пятистенка	1	0	OV	Четырёхстенку знаю, пятистенку знаю, а это кто знает, что это такое.	знать
все	vse	всё	1	0	OV	На 9 сутки, пишет, прости, давай встретимся, все обьясню .да, мы увиделись, и я его простила. (нравился очень ).но он так мне и не дал вращумительного ответа, где его носила... для меня на тот момент было не суть важно, хотя очень обидно .Мы начали снова встречаться, были близки.	обьяснить
Картину	kartina	картина	1	0	OV	Картину покажите и назовите, пожалуйста.	показать
Что	chto	что	1	0	OV	Что посоветуете?	посоветовать
Что	chto	что	1	1	OV	Что вы думаете об идее легализации боевого короткоствольного оружия?	думать
значок	znachok	значок	1	0	OV	Столкнулся с такой проблемой, добавляю папки со всякими звуками в фл, а их и открыть в самой фл нельзя и значок показывает белым цветом.	показывать
что	chto	что	1	0	OV	Песня была актуальна лет 11-12 назад, на космическую тематику, пищалочка там такая пи пи пи пипипипи, и единственное что помню там голос по радио говорит «кислород» , жалко голосовуху не записать на ответы (	помнить
все	vse	всё	1	0	OV	Он везде за меня платит, все покупает, везде берет с собой, очень уважительно относится.	покупать
автора	avtor	автор	1	1	OV	Какой то русский писатель фантаст. в конце 90х наткнулась на книжку в красно чёрной обложке, автора не помню.	помнить
Картину	kartina	картина	1	0	OV	Картину покажите пожалуйста	показать
экипаж корабля	ekipazh	экипаж	2	1	OV	Несмотря на базирование на Холбоулин, экипаж корабля связывают шефские отношения с городом Голуэй.	связывать
Подобную историю	istorija	история	2	0	OV	Подобную историю рассказывают сомалийцы, о двух женщинах -- чёрной и красной, в данном случае чёрная женщина обманывает красную.	рассказывать
Большую роль	rol'	роль	2	0	OV	Большую роль играет методологическая составляющая -- как именно ставить задачи, какие предположения принять с целью дальнейшего математического изучения.	играть
Остальные песни	pesnja	песня	2	0	OV	Остальные песни поёт Евгения Бахарева, которую мы уже знаем по альбому 2002 г. -- ``Где теперь любовь? ``.	петь
мистера Адлера	mister	мистер	2	1	OV	В последний момент мистера Адлера останавливают дерущиеся Твик и Крэйг (Они разбивают окно, в результате чего мистер Адлер отключает станок и в очередной раз говорит: ``Не балуйтесь, вы слишко много балуетесь! ``.	останавливать
это вещество	veschestvo	вещество	2	0	OV	Ещё в XIX в. её использовали для лечения ревматизма и мочекислого диатеза, а сегодня это вещество синтезируют в больших количествах, так как оно служит основой для производства многих лекарств.	синтезировать
какой штаб	shtab	штаб	2	0	OV	По Пекину распространялась листовка ``Откроем огонь по Чэнь И, очистим Министерство иностранных дел! ``, в которой говорилось: ``В конце концов, какой штаб представляет Чэнь И?	представлять
косой крест	krest	крест	2	1	OV	В России косой крест зачастую называют андреевским.	называть
Его позицию	pozitsija	позиция	2	0	OV	Его позицию выражают слова: ``Сценарий плохой, диалоги хромают, актёрская игра бедная, и я видел лучшие спец-эффекты в Зена -- королева воинов`` ().	выражать
фон которой	fon	фон	2	1	OV	Большую или значительную часть вегетационного периода они находятся под небольшим слоем воды, водонасыщенность почвы за счёт капиллярного поднятия не прекращается под воздействием специфической болотной растительности, фон которой составляют тростник, камыш, осоки.	составлять
Этих акул	akula	акула	2	0	OV	Этих акул добывают с помощью донных ярусов.	добывать
Домашние матчи	match	матч	2	0	OV	Домашние матчи проводит на стадионе ``Транс Сил``, вмещающем 8000 зрителей.	проводить
его причины	prichina	причина	2	1	OV	Она также сказала, что это было её решение и его причины не стоит предавать огласке.	стоить
Пилота новичка	pilot	пилот	2	1	OV	Пилота новичка сажают, но странности не кончаются.	сажать
Домашние матчи	match	матч	2	0	OV	Основан в 1986 году Домашние матчи проводит на стадионе ``Сайфуллай Диалло``.	проводить
военно-пропагандистские марки	marka	марка	2	0	OV	Обычно военно-пропагандистские марки рассматривают в хронологическом порядке.	рассматривать
эту функцию	funktsija	функция	2	0	OV	Со временем эту функцию возьмет на себя плацента, которой пока нет.	взять
Главную роль	rol'	роль	2	0	OV	Главную роль исполняет Клинт Иствуд.	исполнять
Своё мнение	mnenie	мнение	2	1	OV	Своё мнение Шнеер подкрепляет многочисленными фактами и свидетельствами.	подкреплять
Российский офис	ofis	офис	2	0	OV	Российский офис возглавляет Стивен Кончи.	возглавлять
Голосовые сигналы	signal	сигнал	2	2	OV	Голосовые сигналы синий кит использует, прежде всего, для обмена сигналами с сородичами; они, очевидно, не используются для эхолокации.	использовать
внимание Карел	vnimanie	внимание	2	1	OV	As the hysteria of the 2016 Presidential election intensifies, a more troubling threat than bullshit preoccupies Karel.	поглощать
такую концепцию	kontseptsija	концепция	2	0	OV	But they can at least lay booby-traps to confuse and deter – a concept known as “active defence”.	называть
Точное расписание	raspisanie	расписание	2	1	OV	The Yas Marina Circuit website has exact timings.	найти
эти равнины	ravnina	равнина	2	1	OV	The climate is so dry that these plains are sometimes thought of as part of the Sahara.	считать
Особенный интерес	interes	интерес	2	3	OV	The two paintings by Lucas Cranach the Elder on display are especially eye-catching.	представлять
зрачки его	zrachok	зрачок	2	1	OV	Perhaps that's why a surge of tears clouds his pupils while the syllable of time unearths his crop and surrenders his mystery to the bound waters.	застилать
Особую роль	rol'	роль	2	0	OV	Особую роль выполняют прикладные алгоритмы, предназначенные для решения определённых прикладных задач.	выполнять
Важную роль	rol'	роль	2	0	OV	Важную роль играют рекурсивные алгоритмы (алгоритмы, вызывающие сами себя до тех пор, пока не будет достигнуто некоторое условие возвращения).	играть
Возникновение альпинизма	vozniknovenie	возникновение	2	3	OV	Возникновение альпинизма чаще всего связывают с покорением 8 августа 1786 врачом Мишелем-Габриэлем Паккардом и горным проводником Жаком Бальма (Jacques Balmat, 1762-1834) высшей точки Альп - Монблана.	связывать
Скальные стены	stena	стена	2	0	OV	Скальные стены преодолевают лазанием в связках с попеременной организацией страховки напарника по связке.	преодолевать
Этот остров	ostrov	остров	2	1	OV	Этот остров сейчас называют Спартел - по названию океанской банки, находящейся на глубине 56 метров.	называть
сам термин	termin	термин	2	0	OV	Остановимся подробнее на технобиологии - сам термин определим в заключении, сейчас же рассмотрим его содержание.	определить
такое поведение	povedenie	поведение	2	0	OV	И что любопытно - "банкомет" такое поведение предвидит.	предвидеть
чьи чаяния	chajanie	чаяние	2	0	OV	Так почему Навальный делает ставку не на них, а на агрессивно-упертых и замшелых гонителей чего ни попадя, чьи чаяния озвучивает Чаплин?	озвучивать
Концепцию реформы	kontseptsija	концепция	2	2	OV	Концепцию реформы президент ждет и от бизнес-сообщества.	ждать
только реформу	reforma	реформа	2	0	OV	Это только реформу затянет, тем более что можно анализировать функции ведомств, которые затем придется упразднять.	затянуть
этот эпизод	epizod	эпизод	2	0	OV	Об одном из таких механизмов пишет он в своей книге воспоминаний, и этот эпизод пересказывает Чудакова.	пересказывать
Этот реализм	realizm	реализм	2	1	OV	Этот реализм часто ставят в вину Гайдару, обвиняя его в антигосударственничестве.	ставить
такие машинки	mashinka	машинка	2	0	OV	В Америке такие машинки называют "мыльницами" (несущим кузовом служит деревянный ящик из-под мыла), в Австралии их называют "Билли", в Англии "багги", в Шотландии "боги", а в России по-простому, "тачки".	называть
не всё	vse	все	2	0	OV	Мы не всё знаем о себе, нам нужны новые открытия.	знать
Позицию церкви	pozitsija	позиция	2	1	OV	Позицию церкви проясняет письмо влиятельного кардинала Беллармино, направленное 12 апреля 1615 года теологу Паоло Антонио Фоскарини, защитнику коперниканства.	прояснять
подвижность Земли	podvizhnost'	подвижность	2	1	OV	В конце письма Галилей высмеивает невежд, которые "подвижность Земли объявляют ересью" и сообщает, что намерен анонимно опубликовать новый трактат в защиту своей позиции, но прежде хочет закончить давно задуманную книгу по механике.	объявлять
Поиск сущности	poisk	поиск	2	2	OV	Поиск сущности я считаю занятием суетным и невозможным, а затраченные усилия - в равной мере тщетными как в случае с удалёнными небесными субстанциями, так и с ближайшими и элементарными; и мне кажется, что одинаково неведомы как субстанция Луны, так и Земли, как пятен на Солнце, так и обыкновенных облаков…	считать
эту версию	versija	версия	2	4	OV	Тем не менее в России эту версию до сих пор энергично пропагандирует протодиакон Андрей Кураев.	пропагандировать
какие книги	kniga	книга	2	0	OV	А он начал расспрашивать, чем увлекаюсь, какие книги читаю, какую музыку люблю, в какие театры хожу.	читать
какую музыку	muzyka	музыка	2	0	OV	А он начал расспрашивать, чем увлекаюсь, какие книги читаю, какую музыку люблю, в какие театры хожу.	любить
свою биту	bita	бита	2	0	OV	Давай сыграем, я тебе свою биту дам.	дать
Особое значение	znachenie	значение	2	1	OV	Особое значение здесь имеет чувство безопасности и сознание своей анонимности при осуществлении интеракций, включая пользование электронной почтой, чатами, ICQ.	иметь
многих людей	chelovek	человек	2	1	OV	Словом, речь о том, что многих людей максимально раздражает в нашей демагогии (пропаганде), а многих - максимально вдохновляет.	раздражать
важнейшую роль	rol'	роль	2	0	OV	Ответ простой: в обеспечении интеллектуальных сверхвозможностей важнейшую роль играет активация определенных, а вероятно, и многих мозговых структур.	играть
случайного человека	chelovek	человек	2	0	OV	Почему же случайного человека держат в руководящем кресле?	держать
Роль резца	rol'	роль	2	4	OV	Роль резца при электроискровой обработке выполняет электрическая искра, расплавляющая на поверхности обрабатываемой детали крошечную порцию металла и испаряющая ее.	выполнять
Широкое распространение	rasprostranenie	распространение	2	0	OV	Широкое распространение получают работы по нанесению на инструментальные материалы различных по составу покрытий: карбидов, нитридов и карбонитридов титана, карбидов и нитридов молибдена, циркония, гафния, ниобия и др.	получать
Аналогичные заявления	zajavlenie	заявление	2	0	OV	Аналогичные заявления делают и другие фирмы.	делать
Эту энергию	energija	энергия	2	1	OV	Эту энергию и дает электрическое поле: ионы начинают двигаться туда, где их больше, то есть концентрироваться.	давать
Особое значение	znachenie	значение	2	0	OV	Особое значение имеет то, что аппарат создается на новой технической основе.	иметь
главную роль	rol'	роль	2	0	OV	Этим подчеркивается, что в освоении космического пространства главную роль играет наука.	играть
этот проект	proekt	проект	2	0	OV	Но меня тут же "приструнили", мол, этот проект финансируют международные организации, много средств вложили американцы, и мы не вправе даже сомнения в его целесообразности высказывать.	финансировать
Это направление	napravlenie	направление	2	2	OV	- Это направление мы не обсуждаем, так как расходы на МКС идут по другим статьям бюджета.	обсуждать
огромную роль,	rol'	роль	2	3	OV	И огромную роль, безусловно, играет наша область науки.	играть
мою позицию	pozitsija	позиция	2	0	OV	Большинство коллег мою позицию разделяют и поддерживают.	разделять
высокий холм	holm	холм	2	0	OV	Около 1860 года высокий холм увенчивает форт, который получает современное название; вплоть до 1970-х он служит базой для британских, японских оккупационных и, наконец, сингапурских военных сил.	увенчивать
бычью силу	sila	сила	2	1	OV	Его могущественная кисть не исцеляет зрения, но бычью силу ему придает, так что глаз наливается кровью.	придавать
значительную роль	rol'	роль	2	0	OV	И сегодня хорошо известны морские полукочевники, в хозяйственной деятельности которых значительную роль играет рыболовство, иногда сочетающееся с торговлей и морским разбоем.	играть
Какие чувства	chuvstvo	чувство	2	1	OV	Какие чувства они вызывают?	вызывать
всех детей	rebenok	ребенок	2	0	OV	Я собирался написать бедному Тому письмо, пригласить в СССР, где все народы братья и всех детей пускают в школу.	пускать
Его рот	rot	рот	2	0	OV	Его рот раздирает счастливая улыбка.	раздирать
прибалтийскую республику	respublika	республика	2	0	OV	Почему прибалтийскую республику представляют этот ближневосточный ребенок и этот зубастый - то ли хитро улыбающийся, то ли страдальчески сморщившийся верблюд?	представлять
все это	eto	это	2	0	OV	Нанятый албанец все это собирает в мешки и относит/отвозит на маслодавильный пресс, имеющийся в любой деревушке.	собирать
Греческую грамоту	gramota	грамота	2	0	OV	Греческую грамоту читайте, правьте неизбежные ошибки в вашем имени, адресе и пр.	читать
все это	eto	это	2	0	OV	Нанятый албанец все это собирает в мешки и относит/отвозит на маслодавильный пресс, имеющийся в любой деревушке.	собирать
что конкретно	chto	что	2	1	OV	Их форму я бы определил как доисторическую, хотя и затруднился бы объяснить, что конкретно имею в виду.	иметь
древнерусские рукописи	rukopis'	рукопись	2	1	OV	Не в последнюю очередь оттого, что древнерусские рукописи я получаю там из рук Михаила Алексеевича Шибаева и Натальи Николаевны Невзоровой.	получать
их предмет	predmet	предмет	2	3	OV	Их постоянно гложет подозрение, что их предмет студенты-филологи считают второстепенным.	считать
их предмет	predmet	предмет	2	2	OV	Именно таким их предмет студенты и считают.	считать
мои лекции	lektsija	лекция	2	0	OV	Не исключал я и того, что мои лекции посещает славистка с гипертрофированным интересом к поцелуям.	посещать
роль Авроры	rol'	роль	2	1	OV	К столику подсели три балеринки в костюмах и, не обращая внимания на старика, зачирикали о скандале, который прима Васильева учинила в дирекции, узнав, что роль Авроры отдают молодой Гребневой.	отдавать
Паричок мой,	parichok	паричок	2	4	OV	- Паричок мой, пожалуйста… отметьте, - вежливо сказал Илья Ильич.	отметить
Ваших олухов	oluh	олух	2	0	OV	Их исполняли примы и солисты, ну, еще немного кордебалет, как фон, а насчет миманса - там он просто тыкал Чижика пальцем в грудь: - Ваших олухов выставьте слева и справа штук по пять.	выставить
эти сметы	smeta	смета	2	1	OV	Я сказал: эти сметы пока отложите, да, да!	отложить
Какую работу	rabota	работа	2	0	OV	Какую работу предлагают.	предлагать
рабочие места	mesto	место	2	2	OV	Формальный сектор экономики рабочие места преимущественно не создает, а ликвидирует.	создавать
Костоправа Елизарова,	kostoprav	костоправ	2	4	OV	Костоправа Елизарова, например, помнят за рабочие руки, а к приезду оперной дивы из Молдавии Марии Биешу готовились заранее.	помнить
потолок которого	potolok	потолок	2	1	OV	Часть из них состоит на госохране - например, Мраморный зал, потолок которого украшают барельефы известных произведений зодчества 1930-х - от Речного вокзала до Дворца Советов, - и ресторан с живописным потолком "Салют Победы".	украшать
и Монголию	Mongolija	Монголия	2	0	OV	Они и Монголию закрашивают как свои владения, и еще несколько соседних стран норовят перекрасить частями или целиком.	закрашивать
это ж	eto	это	2	5	OV	Но это ж они не для себя делают, а для нас.	делать
учебники, форму	uchebnik	учебник	2	2	OV	И там траты: в фонд класса сдай, учебники, форму купи.	купить
этот кредит	kredit	кредит	2	1	OV	А ей этот кредит не дают, поскольку она в декретном отпуске.	давать
какие перемены	peremena	перемена	2	0	OV	О том, какие перемены принесет нынешний учебный год тем, кто учится, и тем, кто учит, "Итогам" рассказал министр образования России Владимир Филиппов.	принести
не то	to	то	2	0	OV	Знаете, мы так долго ругали СМИ за то, что они не то пишут и показывают, и только теперь поняли: надо с ними сотрудничать.	писать
наибольшую прибыль	pribyl'	прибыль	2	0	OV	Интерес очевидным образом возрастает по мере того как вложение увеличивается, а вероятность успеха снижается: наибольшую прибыль приносят самые рискованные вложения.	приносить
Какие преимущества	preimuschestvo	преимущество	2	0	OV	- Какие преимущества имеет агентство с "правильным" названием?	иметь
Эту роль,	rol'	роль	2	5	OV	Эту роль, по идее разработчиков, возьмут на себя компании-посредники, заключающие с банками соответствующие договоры.	брать
Горячую воду	voda	вода	2	2	OV	Горячую воду в экодоме получают при помощи термосифонов.	получать
аналогичный подход	podhod	подход	2	0	OV	Сегодня аналогичный подход применяет немало компаний, работающих в дорогом секторе рынка.	применять
эту экспедицию	ekspeditsija	экспедиция	2	1	OV	Раз мы так долго связь с ним не смогли установить, то шансов на то, что мы эту экспедицию сейчас осуществим, очень мало".	осуществить
особое значение	znachenie	значение	2	0	OV	В 2010 году в связи с отменой дозаправок особое значение приобретает экономичность мотора, так как на старте у машин с более экономичными моторами может быть меньше топлива.	приобретать
Гоночную карьеру	kar'era	карьера	2	3	OV	Гоночную карьеру все пилоты обычно начинают в очень юном возрасте с картинга.	начинать
чьи истории	istorija	история	2	1	OV	Настоящие герои, те, чьи истории потом перечитываешь и пересказываешь, не выдуманы.	перечитывать
имена которых	imja	имя	2	1	OV	Казненные наемники и военные комиссары, цирковые атлеты и коварные любовницы, подпольщики, изгнанники и серийные убийцы, имена которых вычитываешь из учебников истории, никуда не исчезли из обжитого городского пространства.	вычитывать
сухой горизонт	gorizont	горизонт	2	0	OV	Она перестает реагировать на время, не замечая, как после бесконечного дня постепенно ложатся сумерки и сухой горизонт закрашивают краски и уголь.	закрашивать
Все функции	funktsija	функция	2	0	OV	Все функции берет на себя воздух.	брать
такие нейтроны	nejtron	нейтрон	2	0	OV	Кстати, такие нейтроны производит не реактор, а специальное устройство с замедлителем.	производить
Эту программу	programma	программа	2	0	OV	Эту программу финансирует государство, а потому она продумана детально и объемно.	финансировать
Огромное влияние	vlijanie	влияние	2	0	OV	Огромное влияние оказывают на них "зеленые", а потому запускать новые реакторы в Европе, скорее всего, не удастся.	оказывать
эту ответственность	otvetstvennost'	ответственность	2	0	OV	- В то время как многие только говорят о социальной ответственности бизнеса, Прохоров эту ответственность демонстрирует".	демонстрировать
силовые структуры	struktura	структура	2	0	OV	Но если мы обратимся к организациям вполне правительственным (к чеченскому правительству, к структурам МВД и внутренних войск, куда сегодня "влиты" кадыровцы, к прочим "законным" вооруженным формированиям, к парламенту, от которого силовые структуры курирует бывший начальник масхадовской госбезопасности), то на проблему "засоренности кадров" Датского совета боевиками придется взглянуть иначе.	курировать
Пример тому	primer	пример	2	1	OV	Пример тому показывает бригада судомонтажников горьковского завода "Красное Сормово", возглавляемая коммунистом Б. Перевезенцевым.	показывать
Роль стрелочника	rol'	роль	2	2	OV	Роль стрелочника тут играет температура.	играть
эти понятия	ponjatie	понятие	2	1	OV	Один из критериев при приеме насельников в общину -- человек должен быть умственно отсталым, но не психически больным (эти понятия часто путают, но напрасно: люди со слабо развитым интеллектом совсем необязательно больны психическим заболеванием, как и, наоборот, высокий уровень интеллекта -- еще не признак психического здоровья).	путать
высший балл	ball	балл	2	0	OV	Понятное дело, высший балл ставят, если поваленное дерево забивает колышек в землю.	ставить
Огромное значение	znachenie	значение	2	0	OV	Огромное значение имеет и геометрия отрезанных лесорубом дисков.	иметь
Самых мощных	moschnyj	мощный	2	1	OV	Самых мощных это приводит к самоубийству.	приводить
Любителей телемарка	ljubitel'	любитель	2	1	OV	Любителей телемарка привлекает свобода и естественность движений, как при ходьбе, красота и оригинальность техники катания, а также возможность с комфортом путешествовать на лыжах по равнинной местности и даже ходить пешком в горнолыжных ботинках.	привлекать
роль тросиков	rol'	роль	2	1	OV	В еще более активных креплениях Linken роль тросиков выполняет жесткая платформа.	выполнять
особое место	mesto	место	2	0	OV	Среди них особое место занимает большой герметичный марсоход для путешествий длительностью до нескольких недель.	занимать
Это зерно	zerno	зерно	2	2	OV	Это зерно уже не спасешь.	спасти
миллионы избирателей	million	миллион	2	1	OV	Вся надежда на то, что теперь, когда съезд официально выбрал Трампа своим кандидатом в президенты от республиканской партии, миллионы избирателей объединит другая партия - не демократическая, а эклектическая.	объединить
место испуга	mesto	место	2	1	OV	Только место испуга занимает смех.	занимать
Особый оттенок	ottenok	оттенок	2	0	OV	Особый оттенок приобретает и вальс Штрауса, под звуки которого проходят все эти картинки.	приобретать
что именно	chto	что	2	3	OV	Выражение "черт одноглазый" прочно закрепилось в языке и давным-давно употребляется без понимания того, что именно это одноглазие означает.	означать
лицо ее	litso	лицо	2	1	OV	Медуза из храма Аполлона в Вейях тоже смеется и высовывает язык, а лицо ее обрамляют не только малозаметные змеи, но своего рода лепестки или языки пламени, создающие эффект лица-солнца.	обрамлять
такие вещи	vesch'	вещь	2	0	OV	- Ничего, что я такие вещи рассказываю? - спросила она меня испуганно.	рассказывать
такой пример	primer	пример	2	0	OV	Какими ж им быть, когда старшие им такой пример подают!	подавать
Штаны длинные	shtany	штаны	2	1	OV	- Штаны длинные носит, говно сдавать не хочет, пищей нашей брезгует.	носить
Штаны длинные	shtany	штаны	2	1	OV	- Штаны длинные носит, говно сдавать не хочет, пищей брезгует, да еще бога какого-то поминает!	носить
какое отношение	otnoshenie	отношение	2	0	OV	Откровенно говоря, мне не очень было понятно, какое отношение имеет этот памятник к научным открытиям.	иметь
Штаны длинные	shtany	штаны	2	1	OV	Штаны длинные носит, говно не сдает, пищей брезгует, а по-нашему говорит, как мы.	носить
Пурим - шпиль	purim	пурим	2	4	OV	Пурим-шпиль актеры ТЮЗа разыгрывают весело, бесшабашно, как и положено в балагане, какого бы национального происхождения он ни был.	разыгрывать
представителей науки	predstavitel'	представитель	2	1	OV	Куда больше представителей науки беспокоит беспомощность человечества перед будущим.	беспокоить
Эти места	mesto	место	2	3	OV	Эти места глобальный экологический кризис затронет в последнюю очередь".	затронуть
будущие поколения	pokolenie	поколение	2	0	OV	Экологи пугают перспективой, что будущие поколения ожидает незавидная участь - жизнь на отравленных кислотой пустырях.	ожидать
цели иные	tsel'	цель	2	1	OV	Однако цели они преследуют иные.	преследовать
Финские унитазы	unitaz	унитаз	2	6	OV	"Финские унитазы я вообще-то не очень уважаю", - плавно жуя, сказал сантехник.	уважать
виртуальных людей	chelovek	человек	2	0	OV	Помимо этого, виртуальных людей усаживают за руль сельскохозяйственных машин, заставляют гасить пожар на подводных лодках в боевых условиях, перевозят туда-сюда в комфортабельных интерьерах авиалайнеров и "дают прокатиться" на мотоциклах, гидроциклах и сноубордах.	усаживать
их частоту	chastota	частота	2	0	OV	Затем пациента облучают радиоволнами, причем их частоту подстраивают таким образом, чтобы протоны в его теле могли поглотить часть энергии радиоволн и изменить ориентацию своих магнитных полей относительно направления постоянного магнитного поля.	подстраивать
Престижную награду	nagrada	награда	2	0	OV	Престижную награду получат два известных российских физика-теоретика - академики Виталий Гинзбург из Физического института им. П. Н. Лебедева РАН и Алексей Абрикосов, работающий в настоящее время в Аргоннской национальной лаборатории (Иллинойс, США), а также профессор Энтони Дж. Леггетт (Университет Иллинойс, США).	получить
Немаловажную роль	rol'	роль	2	0	OV	Немаловажную роль играют и современная материально-техническая база, и новейшее оборудование, которым оснащены инженерные институты и университеты Франции.	играть
Особый энтузиазм	entuziazm	энтузиазм	2	0	OV	Особый энтузиазм испытывают ученые, которые уверены, что на поверхности Марса имеются следы биологической активности.	испытывать
Этот принцип	printsip	принцип	2	0	OV	Этот принцип исповедуют большинство стратегических оптимистов.	исповедовать
Зашифрованные данные	dannye	данные	2	2	OV	Зашифрованные данные процессинговый центр пересылает в ту платежную систему, которая выпустила карточку.	пересылать
вашу душу	dusha	душа	2	1	OV	- Это было бы просто чудесно, - вздохнул Устиев, - я только потому и решился обратиться к вам, что вашу душу сразу почувствуешь.	почувствовать
Особое внимание	vnimanie	внимание	2	12	OV	Особое внимание ЦИК и другие организации, задействованные в подготовке выборов, вероятно, уделят партиям, которые, по выражению Путина, отличаются "невнятностью политических позиций" и "определенной политической неискренностью".	уделить
все это	eto	это	2	0	OV	Попробуем расшифровать, что все это значит.	значить
огромную роль	rol'	роль	2	0	OV	Авторы программы огромную роль отводят исследованию естественных и созданию искусственных нечетких нейросетевых систем и систем мягких вычислений.	отводить
Это Денисова	Denisov	Денисов	2	0	OV	Это Денисова разрушают сомнения, червивые мысли, чугунные сны.	разрушать
тот нашу	rodina	родина	2	0	OV	Но старик, к которому воззвал праведный глас Денисова, сразу обрадовался, сказал, что такую контру, как Денисов, он рубал на южных и юго-восточных фронтах, что он боролся с Деникиным, что он как участник ВОВ получает к праздникам свой шмат икры, и ветчину утюжком производства Федеративной Республики Югославии, и даже две пачки дрожжей, что свидетельствует о безоговорочном доверии к нему, участник…	предать
эту версию	versija	версия	2	0	OV	Кстати, эту версию подтверждает и сюжет картины Михаила Авилова "Подвоз пушек Пугачеву", на которой изображено, как Емельян Пугачев принимает в дар пушки от уральских рабочих.	подтверждать
земной шар	shar	шар	2	0	OV	В только что опубликованной книге "Жизнь и смерть планеты Земля" американский астрофизик из университета штата Вашингтон Дон Браунли и его коллега палеонтолог Питер Уорд полагают, что, несмотря на парниковый эффект, впереди земной шар ждет холод - возвращение ледникового периода.	ждать
эту функцию	funktsija	функция	2	0	OV	В тюрьме эту функцию выполняют сами заключенные, которые захотели стать слушателями, были одобрены специальным тюремным сотрудником, а главное - одобрены "самаритянами".	выполнять
Особое значение	znachenie	значение	2	0	OV	Особое значение имеют состояние и функциональная способность печени (в группе риска пожилые люди, больные - страдающие диабетом, скрытыми формами этого заболевания, циррозом печени), состояние бодрствования или сна, неравномерность распределения в воздухе, концентрация газа и время пребывания пострадавшего в зоне его максимального скопления.	иметь
введение гидрокортизона	vvedenie	введение	2	1	OV	При нормальном ответе коры надпочечников введение гидрокортизона прекращают.	прекращать
Егора Гайдара	Egor	Егор	2	1	OV	Егора Гайдара роднит с Владимиром Путиным одно обстоятельство: и того, и другого на ключевую для российской политики роль выбрал Борис Ельцин.	роднить
Какого черта	chert	черт	2	1	OV	И все имели право спросить: "Какого черта ты делаешь в этом кабинете?	делать
этот вопрос	vopros	вопрос	2	2	OV	Я этот вопрос сегодня не решаю.	решать
Таких людей	chelovek	человек	2	1	OV	Таких людей обычно называют метеолабильными или метеочувствительными.	называть
многие заболевания	zabolevanie	заболевание	2	0	OV	Результаты исследований отечественных и зарубежных ученых показывают, что многие заболевания объединяет общее - рассогласованность функций организма между собой и внешними датчиками времени.	объединять
все это	eto	это	2	1	OV	Вы все это прекрасно знаете.	знать
эти письма	pis'mo	письмо	2	0	OV	Я обычно эти письма выбрасываю в мусорную корзину сразу и никогда на них не отвечаю.	выбрасывать
новые гранты	grant	грант	2	0	OV	Мы смотрим: если человек работает там, а новые гранты приносит нам, возникают совместные исследования - все нормально.	приносить
новую идею	ideja	идея	2	1	OV	На грант человек новую идею не подает.	подавать
такие " бабки "	babki	бабки	2	1	OV	Еще бы, такие "бабки" срубают на пустом месте.	срубать
все это	eto	это	2	0	OV	- А мы все это развеселим, - сказал толстяк Леонтий, поглаживая брюшко.	развеселить
людей - то	chelovek	человек	2	5	OV	- Что вы людей-то зазря с ума сводите, - набросился он на Клеопатру Ивановну и даже чуть не ущипнул ее, для верности.	сводить
Неприличный анекдот,	anekdot	анекдот	2	5	OV	- Неприличный анекдот, может быть, и услышит, - задумчиво сказал в ответ Николай.	слышать
тот свет	svet	свет	2	2	OV	- Что-то вы тот свет все время поминаете, - пискнула старушка Анатольевна.	поминать
темпы роста	temp	темп	2	2	OV	Поэтому если темпы роста мы ориентируем на 10 процентов в год, то темпы роста оплаты труда должны быть выше - необходимо как минимум их удвоение в течение ближайших трех лет.	ориентировать
какое отношение	otnoshenie	отношение	2	1	OV	Но противники проекта стали спрашивать, какое отношение это имеет к тем положениям документа, которые позволяют привлекать армейские части для борьбы с демонстрантами и забастовщиками.	иметь
производственные споры	spor	спор	2	1	OV	Независимые профсоюзы закрыты, забастовки запрещены, производственные споры теперь разбирают фашистские арбитражи, а жалобы обиженных граждан - руководители местных фашистских организаций.	разбирать
мировых судей	sud'ja	судья	2	0	OV	Качество мировых судей оставляет желать лучшего.	оставлять
чье 125-летие	125-letie	125-летие	2	3	OV	На этот раз Владимир сыграет программу из произведений Сергея Рахманинова, чье 125-летие в этом году отмечает весь музыкальный мир.	отмечать
приоритетную роль	rol'	роль	2	0	OV	В создании, укреплении и развитии интеллекта, как показывает опыт, приоритетную роль играют научно-педагогические кадры вузов и НИИ.	играть
все предательства	predatel'stvo	предательство	2	0	OV	Конечно, "демократы" все предательства оправдывают тем, что перечисленные "мероприятия" делаются только в отношении сторонников социализма, т. есть идеологических противников нынешнего режима.	оправдывать
Важное место	mesto	место	2	3	OV	Важное место в творчестве ученого занимает исследование берестяных грамот, во многих работах наглядно продемонстрированы возможности этих документов как важнейших исторических источников.	занимать
подобные предметы	predmet	предмет	2	0	OV	Важно то, что подобные предметы находят не в княжеской резиденции, а на усадьбах зажиточных новгородцев, потомки которых хорошо известны летописцам как бояре, часто владевшие высшими государственными должностями.	находить
Свою беспомощность	bespomoschnost'	беспомощность	2	1	OV	Свою беспомощность он вымещает на других женщинах, доказывая прежде всего себе, что он "крутой" и сильный.	вымещать
всю цепочку	tsepochka	цепочка	2	1	OV	Пока всю цепочку не построим, не познаем суть явлений до конца.	строить
Настоящего ученого	uchenyj	ученый	2	3	OV	Настоящего ученого не так уж волнует, как будет использоваться полученный им результат: ему важно понять суть явления, а следствия сами обнаружатся.	волновать
его сотрудников	sotrudnik	сотрудник	2	2	OV	Было огромное количество желающих попасть именно в этот институт, так как его сотрудников с удовольствием берут в любом западном университете.	брать
поручения президента	poruchenie	поручение	2	2	OV	- У меня такое впечатление, что поручения президента чиновники выполняют только в тех случаях, когда им это выгодно.	выполнять
Наибольший эффект	effekt	эффект	2	0	OV	Наибольший эффект дает термическая обработка высоколегированных сталей, которые используются для наиболее ответственных конструкций, требующих уникального сочетания различных свойств, недостижимого для других материалов.	давать
Широкое распространение	rasprostranenie	распространение	2	0	OV	Широкое распространение найдут методы получения функциональных материалов, которые характеризуются необычными механическими или физическими свойствами.	найти
Этот сигнал	signal	сигнал	2	1	OV	Этот сигнал он посылает согражданам, и это тоже соблазнительно счесть банальным способом найти виноватого для вымещения на нем социальной злобы.	посылать
силовые позиции	pozitsija	позиция	2	1	OV	И если в экономический блок Саакашвили командирует тех, без кого ему просто не обойтись, то силовые позиции он доверяет исключительно близким друзьям.	доверять
свое президентство	prezidentstvo	президентство	2	0	OV	Наоборот, есть даже некоторое подозрение, что Саакашвили на самом деле вовсе не так уж держится за власть и свое президентство рассматривает лишь как плацдарм к дальнейшему самоутверждению покруче - вплоть до генсека ООН или ЮНЕСКО.	рассматривать
Эту версию	versija	версия	2	2	OV	Эту версию никто не опровергает.	опровергать
эту мифологию	mifologija	мифология	2	1	OV	Да и сам кремлевский выбор эту мифологию окончательно добивает: ведь еще совсем недавно считалось, что аварцу как представителю самого многочисленного народа путь в дагестанские лидеры заказан - по причине политкорректной заботы о том самом межэтническом балансе.	добивать
костяк которой	kostjak	костяк	2	1	OV	Исследования в этом направлении были начаты в России компанией "АММ-2000", костяк которой составляют специалисты из Института акустики РАН и НИИ точного приборостроения.	составлять
ультразвуковой сканер	skanner	сканнер	2	1	OV	В отличие от МРТ ультразвуковой сканер "потянет" любая поликлиника или диагностический центр.	потянуть
своего Дракона	Drakon	Дракон	2	0	OV	А этот, внутренний, он ведь точно знает, с кого ты своего Дракона пишешь.	писать
уж это	eto	это	2	1	OV	А кстати, атеизм у нас отнюдь не запрещен, уж это я помню точно, сам писал вторую главу конституции.	помнить
вразумительное слово	slovo	слово	2	6	OV	Одна исподтишка язык адвокатам показывает, а вот вразумительное слово из этих накрашенных ротиков клещами не вытащишь.	вытащить
дело Пасата	delo	дело	2	1	OV	14 мая дело Пасата передают в суд вопреки окрикам из Москвы.	передавать
целый месяц	mesjats	месяц	2	0	OV	И в наши дни у некоторых африканских народностей сохраняются законы, согласно которым мальчик становится взрослым лишь после того, как целый месяц проживет в лесу в полном одиночестве.	прожить
Эту песню	pesnja	песня	2	0	OV	"Эту песню запевает молодежь!.."	запевать
Наибольшее применение	primenenie	применение	2	2	OV	Наибольшее применение костный возраст находит в судебно-медицинской практике при идентификации останков.	находить
Печальный интерес	interes	интерес	2	0	OV	Печальный интерес вызывает только тот факт, что на нашей почве с трудом приживаются самые здоровые растения.	вызывать
огромное значение	znachenie	значение	2	0	OV	В его конструкции используются новейшие композитные материалы и сплавы металлов, огромное значение имеют тонкости, наработанные механиками внутри команд.	иметь
Корпус боба	korpus	корпус	2	1	OV	Корпус боба изготавливают из композитных материалов, например из карбона.	изготовлять
Охлаждаемую поверхность	poverhnost'	поверхность	2	0	OV	Охлаждаемую поверхность заливают водой, и образуется лед, на котором состязаются бобслеисты и саночники.	заливать
логическое мышление	myshlenie	мышление	2	0	OV	Но ведь мы такие основы закладываем научные, так логическое мышление развиваем, на кружках-олимпиадах нестандартные задачи целыми классами решаем!	развивать
нестандартные задачи	zadacha	задача	2	2	OV	Но ведь мы такие основы закладываем научные, так логическое мышление развиваем, на кружках-олимпиадах нестандартные задачи целыми классами решаем!	решать
очевидцев трагедии	ochevidets	очевидец	2	2	OV	Катастрофу генеральского Ми-8 наблюдали экипаж и пассажиры летевшего следом вертолета, который приземлился в Моздоке, где очевидцев трагедии сейчас опрашивают следователи.	опрашивать
Их поверхность	poverhnost'	поверхность	2	0	OV	Их поверхность протравливают: на светлой травленой поверхности хорошо заметны дефекты штамповки и складки.	протравливать
неизгладимое впечатление	vpechatlenie	впечатление	2	0	OV	На многих дайверов неизгладимое впечатление производит вид ледяной корки снизу, со стороны водоема: это сравнимо со взглядом на облака сверху, через иллюминатор самолета.	производить
детали редуктора	detal'	деталь	2	1	OV	В изолированных моделях мембрану отделяют от окружающей среды специальной камерой (полой или залитой особой жидкостью с низкой теплопроводностью на основе силиконов), а детали редуктора покрывают препятствующим обмерзанию напылением.	покрывать
настоящий экстрим	ekstrim	экстрим	2	0	OV	Если не обеспечить человека на поверхности теплой одеждой, то настоящий экстрим испытает именно он, а жизнь дайвера окажется в опасности.	испытать
" паровых " моделистов	modelist	моделист	2	0	OV	Поэтому, когда "паровых" моделистов спрашивают, зачем им эти архаичные машины и в чем прелесть паровых моделей по сравнению с электрическими, они отвечают: "Во-первых, это настоящие паровозы".	спрашивать
эти документы	dokument	документ	2	3	OV	Когда Али заказал там поисковую картотеку (крайне несовершенную) к фонду "Интендантское управление главнокомандования вермахта", сотрудник архива сказал ему: "Господин Али, вы, конечно, хорошо разбираетесь в этих делах, но здесь, мне кажется, вы ошиблись, эти документы обычно никто не заказывает".	заказывать
какие блага	blago	благо	2	1	OV	И это было лишь предвкушением того, какой станет жизнь после войны, какие блага она сулит.	сулить
второй же	vtoroj	второй	2	1	OV	О первой он упоминает однажды и мимоходом как об известном, само собой разумеющемся и отнюдь не решающем факторе, второй же квалифицирует как проводимый "пунктиром на периферии (немецкого) общества".	квалифицировать
Особое место	mesto	место	2	1	OV	Особое место тут занимает перестройка бюджетной системы.	занимать
Второе место	mesto	место	2	0	OV	Второе место делят между собой немец Bosch и англичанин Dyson, и, наконец, первое место достается модели Bork!	делить
настоящую революцию	revoljutsija	революция	2	0	OV	Но настоящую революцию произведут полезные домашние роботы.	произвести
этот металл	metall	металл	2	0	OV	Строго говоря, делали их не всегда из олова, да и сейчас в чистом виде этот металл используют редко - обычно речь идет о его сплавах.	использовать
Чистое олово	olovo	олово	2	3	OV	Чистое олово для литья не применяют - и "чума оловянная" на горизонте всегда маячит, и металл этот в расплавленном виде не настолько текуч, как некоторые его сплавы, что сказывается на точности передачи мелких деталей.	применять
Неплохой результат	rezul'tat	результат	2	0	OV	Неплохой результат дают художественные же водорастворимые акриловые краски.	давать
их победы	pobeda	победа	2	0	OV	Честолюбивые тираны грезят мировым господством, их победы изучают спустя века, их злодейства входят в историю и энциклопедии злодейств.	изучать
их воспроизведение	vosproizvedenie	воспроизведение	2	0	OV	А когда их воспроизведение берет на себя вибросабвуфер, их партии очень хорошо читаются.	брать
Гениальных хакеров	haker	хакер	2	0	OV	Гениальных хакеров просят не беспокоиться: устройства эти механические и вирусам не подвержены.	просить
Особую технологию	tehnologija	технология	2	0	OV	Особую технологию представляет собой "застаривание" моделей.	представлять
такое условие	uslovie	условие	2	0	OV	Если начальству вздумалось "проверить мозги" или такое условие ставят при приеме на работу - отказывайтесь.	ставить
Институт семьи	institut	институт	2	3	OV	Институт семьи не всегда обеспечивает полноценное духовно-нравственное воспитание детей из-за повышенной занятости родителей поиском дополнительного заработка, наблюдается ненадлежащее исполнение родительских обязанностей у 4% семей, низкий родительский авторитет у 24% опрошенных, неконструктивный, конфликтный стиль взаимоотношений в 37% семей, что также свидетельствует о низкой духовной культуре…	обеспечивать
Такие данные	dannye	данные	2	0	OV	Такие данные приводит Центробанк по итогам 11 месяцев 2007 года.	приводить
свои деньги	den'gi	деньги	2	0	OV	Банк не благотворительная организация: свои деньги вернет всегда.	вернуть
российские вузы	vuz	вуз	2	2	OV	Сегодня, как считает Я. Кузьминов, три четверти студентов России не являются такого рода людьми, и российские вузы все чаще называют "техникумами с пятилетним сроком обучения".	называть
Их инструмент	instrument	инструмент	2	3	OV	Их инструмент вообще никто не замечает.	замечать
Все это	eto	это	2	2	OV	Все это российская статистика отмечает как рост цен, а не качества жизни.	отмечать
точную величину	velichina	величина	2	1	OV	Без доскональных исследований множества рынков точную величину не назовешь, но можно дать косвенную оценку.	назвать
свои меры	mera	мера	2	1	OV	Правительство РФ свои меры уже принимает.	принимать
этот феномен	fenomen	феномен	2	0	OV	Аналитики этот феномен объясняют несколькими причинами.	объяснять
Это кресло	kreslo	кресло	2	1	OV	Это кресло он занимает и по сей день.	занимать
эти переговоры	peregovory	переговоры	2	2	OV	То, чем сейчас будет заниматься Россия, это переговоры, но уже не только переговоры о членстве (хотя и эти переговоры никто не сворачивает), а о прекращении действия ряда соглашений.	свертывать
" Свою игру "	igra	игра	2	1	OV	Почему мы "Свою игру" смотрим с удовольствием, в "Слабом звене" сопереживаем тому, кто набирает больше баллов, а когда экзамен, построенный по похожей схеме, предлагают всем, оказывается, что это начетничество, обман, механический подход к образованию, и вообще как можно трепетные терзания души загонять в прокрустово ложе квиза?	смотреть
этот финал	final	финал	2	0	OV	Но для города, который этот финал принимает, это что угодно, только не спорт.	принимать
последние деньги	den'gi	деньги	2	0	OV	Мы будем по ночам работать, последние деньги отдадим и последнюю рубаху сымем, но все сделаем "красиво".	отдать
последнюю рубаху	rubaha	рубаха	2	0	OV	Мы будем по ночам работать, последние деньги отдадим и последнюю рубаху сымем, но все сделаем "красиво".	снять
Все это	eto	это	2	0	OV	Все это забирает себе хозяин проекта - УЕФА.	забирать
этот инструмент	instrument	инструмент	2	2	OV	В начале недели банк не смог исполнить свои обязательства по сделкам РЕПО - этот инструмент кредитные организации используют для получения краткосрочных займов у своих коллег под залог ценных бумаг.	использовать
Какую позицию	pozitsija	позиция	2	2	OV	- Какую позицию вы сейчас занимаете по поводу Единого государственного экзамена (ЕГЭ)?	занимать
разные варианты	variant	вариант	2	0	OV	Посмотрим, что будет дальше, жизнь ведь разные варианты рождает.	рождать
неверные теоремы	teorema	теорема	2	2	OV	Даже если предположить, что интуиция подводит математиков нечасто и неверные теоремы никто не использует, ФД все равно имеют огромное прикладное значение.	использовать
Все вузы	vuz	вуз	2	0	OV	Все вузы поделят на федеральные и национальные университеты, а также университеты регионального значения.	делить
модель - 2020	model'	модель	2	2	OV	Сегодня модель-2020 обсуждают все.	обсуждать
какой механизм	mehanizm	механизм	2	1	OV	Популярные термины "культурный код", "цивилизационная матрица", "национальные архетипы" так и остались метафорами, поэтическими образами, а какой механизм они описывают, нам не объясняется.	описывать
роль науки	rol'	роль	2	2	OV	И роль науки я вижу прежде всего в демифологизации общественного сознания, в противопоставлении мифам рационального знания.	видеть
Модернизации России	modernizatsija	модернизация	2	2	OV	Модернизации России сегодня мешают не столько косные культурные традиции, сколько отсутствие институтов гражданского общества, которые плохо приживаются как раз потому, что не опираются на традиционные.	мешать
точный диагноз	diagnoz	диагноз	2	0	OV	Тем не менее, точный диагноз покажет лишь вскрытие.	показать
Немаловажную роль	rol'	роль	2	0	OV	"Немаловажную роль играют и нелегалы, - полагает профессор.	играть
наши деньги	den'gi	деньги	2	0	OV	Мы занимаемся тем, что наши деньги вывозим на Запад и поддерживаем своих стратегических конкурентов.	вывозить
Усмешку скептиков	usmeshka	усмешка	2	1	OV	Усмешку скептиков разделяю, но лишь отчасти.	разделять
бизнесменов - хозяев	biznesmen	бизнесмен	2	2	OV	Один из парадоксов Российского мониторинга экономического положения и здоровья населения, проведенного под эгидой Высшей школы экономики, - бизнесменов-хозяев устраивает лояльность их работников к растущей занятости, но тревожит иная тенденция: с увеличением продолжительности рабочего дня не растет производительность труда.	устраивать
все рекорды	rekord	рекорд	2	0	OV	Правда, тут все рекорды бьют Москва (8%) и Санкт-Петербург (6%).	бить
смысл профсоюзов	smysl	смысл	2	1	OV	Другое дело, что в стране, как, кстати, установили несколько центров Федерации независимых профсоюзов России, уровень развития профсоюзного движения таков, что даже многие его лидеры смысл профсоюзов видят не в отстаивании прав работников, а в оказании материальной помощи: в распределении путевок, лечении, льготном проезде и т. д.	видеть
Предвыборную ситуацию	situatsija	ситуация	2	4	OV	Предвыборную ситуацию в интервью Радио Свобода оценивает политолог Марк Урнов.	оценивать
саму службу	sluzhba	служба	2	1	OV	Во-первых, предложения о снижении соответствующих налогов со стороны регулятора фондового рынка звучат регулярно, во-вторых, ни к чему особенному саму службу не обязывают, так как за наполнение бюджета она не отвечает.	обязывать
экономический рычаг	rychag	рычаг	2	0	OV	#NAME?	превращать
Особое беспокойство	bespokojstvo	беспокойство	2	0	OV	Особое беспокойство вызывает ближайшее заседание рабочей группы по присоединению России к ВТО 18 сентября - из планового и скучного мероприятия оно рискует превратиться в эмоциональное обсуждение событий на Кавказе.	вызывать
иностранных специалистов	spetsialist	специалист	2	0	OV	По мнению Игоря Полякова, иностранных специалистов привлекают в России не только деньги, но и возможность кое-чему научиться: "Это опыт решения кризисных задач, который они не смогут получить в стабильных западных странах.	привлекать
всех абитуриентов	abiturient	абитуриент	2	2	OV	Мы всех абитуриентов перед экзаменом предупреждаем: если кто-то будет замечен с каким-то устройством или со шпаргалкой любого вида, - удалим с экзамена.	предупреждать
хорошие дивиденды	dividend	дивиденд	2	2	OV	Американцы полагают, что хорошие дивиденды школьная дружба дает биржевым аналитикам.	давать
какие задачи	zadacha	задача	2	0	OV	О том, какие задачи ставит кабинет министров перед первым автономным вузом и в каком направлении будет развиваться вся российская высшая школа, в интервью "Времени новостей" рассказал ректор ГУ-ВШЭ Ярослав Кузьминов.	ставить
Следующую статью	stat'ja	статья	2	1	OV	Следующую статью я начну с обсуждения ресурсов сторон, вовлеченных в поствыборные баталии.	начать
следы которой,	sled	след	2	8	OV	Стратегически план введения легитимных механизмов защиты собственности новых олигархов после их ухода с властных постов требует определенной консолидации, следы которой, как мне представляется, мы уже наблюдаем.	наблюдать
реальный сектор	sektor	сектор	2	0	OV	Если это действительно произойдет, реальный сектор ждет сокращение производства и замедление темпов развития.	ждать
эту идею	ideja	идея	2	0	OV	Образцом мог бы быть Массачусетский технологический институт, так что среди тех, кто эту идею поддерживает, проект получил прозвище "русский MIT".	поддерживать
Дряхлого мерина	merin	мерин	2	1	OV	Дряхлого мерина не заставишь гарцевать.	заставить
Виктора Болотова	Viktor	Виктор	2	3	OV	Из обязательных предметов выпала литература, и за это Виктора Болотова очень "пилит" общественность.	пилить
это правило	pravilo	правило	2	0	OV	Когда это правило отменят, страна ужаснется истинной картине успеваемости, пугают нас уже сегодня некоторые директора школ.	отменить
студентов МГИМО	student	студент	2	1	OV	По словам Юлии Борискиной, в 2004 году окончившей магистратуру МГИМО по специальности "экономические отношения", студентов МГИМО учат "не знать все, а знать, где посмотреть".	учить
финансирование проекта	finansirovanie	финансирование	2	7	OV	А теперь Яровит совместно с Группой ОНЭКСИМ создает компанию по разработке и выпуску легковых гибридомобилей - финансирование проекта в обмен на 51% акций обеспечит компания Михаила Прохорова.	обеспечить
Круглую дату	data	дата	2	1	OV	Круглую дату шахматисты отмечают серией турниров: первый на прошлой неделе состоялся в Валенсии.	отмечать
художественную гимнастику	gimnastika	гимнастика	2	0	OV	Дерюгину можно понять - художественную гимнастику называют чуть ли не самым необъективным олимпийским видом спорта.	называть
художественную гимнастику	gimnastika	гимнастика	2	0	OV	В России художественную гимнастику ставят во главу угла: трехразовые ежедневные тренировки и минимум свободы.	ставить
Какие аргументы	argument	аргумент	2	0	OV	Какие аргументы предъявляет либеральная оппозиция нынешнему режиму?	предъявлять
аварийный энергоблок	energoblok	энергоблок	2	0	OV	Через 12 лет, когда грянет авария на Чернобыльской АЭС, аварийный энергоблок окружат слоями бетона и назовут конструкцию саркофагом.	окружить
даже это	eto	это	2	1	OV	"Что с них взять, интеллигенция будущая, они даже это не умеют".	уметь
группу Рао	gruppa	группа	2	4	OV	Однако группу Рао возражения Фармера не останавливают.	останавливать
качество обучения	kachestvo	качество	2	1	OV	Мы представляем очередное исследование, где качество обучения оценивают сами выпускники.	оценивать
этот параметр	parametr	параметр	2	0	OV	Онкологическое заболевание в организме давит эти дыхательные волны, а Цилиндры Фараона, наоборот, этот параметр улучшают.	улучшать
такие сигналы	signal	сигнал	2	0	OV	Очень скоро Хьюиш и Белл поняли, что такие сигналы издают не человечки, а звезды особого вида - пульсары.	издавать
такое сообщение,	soobschenie	сообщение	2	4	OV	- Но если придет сигнал, адресованный именно нам, то такое сообщение, может быть, осилим".	осилить
какую активность	aktivnost'	активность	2	0	OV	Я мог предугадывать, какую активность проявит тот или иной ученик, и быстро моделировал в голове процесс, дирижировал.	проявить
этот миллион	million	миллион	2	0	OV	Но ведь ему же этот миллион дают, потому что он самый умный.	давать
какой-то роман	roman	роман	2	0	OV	Они думали, что я им какой-то роман пересказываю.	пересказывать
Консервные банки	banka	банка	2	4	OV	Консервные банки после использования чаще всего выбрасывают.	выбрасывать
листовое железо	zhelezo	железо	2	0	OV	Производство это состоит преимущественно в следующем: листовое железо очищают слабою кислотою от покрывающего его слоя окиси, сушат и прокатывают между твердыми цилиндрами, чтобы образовать сколько возможно гладкую поверхность.	очищать
Лучшую жесть	zhest'	жесть	2	0	OV	Лучшую жесть полируют".	полировать
Шахматную партию	partija	партия	2	0	OV	Шахматную партию начинают белые, дальше стороны делают ходы поочередно, каждым ходом перемещая одну фигуру.	начинать
отдельный атом	atom	атом	2	2	OV	С другой стороны, конечно, есть методы и быстрые, которые я потом еще покажу, но у них, как правило, есть очень плохое пространственное разрешение: они отдельный атом просто не видят.	видеть
этот электрон	elektron	электрон	2	1	OV	И это электрическое поле этот электрон слегка подталкивает - ну, или притормаживает - в зависимости от того, в какой момент времени вылетел электрон, то есть в какую именно фазу этого колебания попал электрон.	подталкивать
Особое внимание	vnimanie	внимание	2	4	OV	Особое внимание в своих построениях Лавлок уделяет бактериальному сообществу Земли.	уделять
Живые организмы	organizm	организм	2	1	OV	Живые организмы также отличает высочайшая сложность организации.	отличать
политические реформы	reforma	реформа	2	0	OV	Вообще, какой смысл в том, что политические реформы декларирует человек, имя которого в последние недели не упоминалось ни Путиным, ни оппозицией; человек, который еще ни разу не выполнил своих обещаний?	декларировать
политические реформы	reforma	реформа	2	0	OV	Он аварии на Ленинском проспекте не сумел расследовать, а туда же - политические реформы обещает…	обещать
Главные итоги	itog	итог	2	0	OV	Главные итоги подводит в понедельник российская пресса, самые интересные выдержки из которой приводит сайт "Заголовки".	подводить
какую сумму	summa	сумма	2	0	OV	Смотря какую сумму выкатят" (власти Москвы, - прим. ред.).	выкатить
народную самодеятельность	samodejatel'nost'	самодеятельность	2	4	OV	Правда, народную самодеятельность экономическая статистика никак не учитывает: все ее данные о рабочих местах и местных доходах фрагментарны и касаются только тех, кто зарегистрировал свою деятельность и платит налоги.	учитывать
все это	eto	это	2	0	OV	Альтернативы с комбинатом или без давно уже нет, точка невозврата пройдена еще при владычестве тут Дерипаски, и власти все это знают, но ведут нечистую игру.	знать
Наших граждан	grazhdanin	гражданин	2	0	OV	Наших граждан вынуждают давать взятки всю жизнь: от рождения ребёнка до ухода в иной мир.	вынуждать
Государственных преступников	prestupnik	преступник	2	1	OV	Государственных преступников возмездие настигает не всегда быстро.	настигать
Мысли Бауэра	mysl'	мысль	2	1	OV	Мысли Бауэра передает в фильме также один из слушателей публичной лекции в политехническом институте Карлсруэ.	передавать
не всех	vse	все	2	0	OV	Отцу Виталию я высказал две просьбы: помочь встретиться с Илларионом в том строгом монастыре, куда к нему не всех пускают, и поговорить с владыкой, так как решение все-таки его.	пускать
и это	eto	это	2	0	OV	А если старый человек груб с вами, то и это прости.	простить
плоху квашню	kvashnja	квашня	2	1	OV	Или: плоху квашню не перепечешь - худу бабу не переделаешь.	перепечь
худу бабу	baba	баба	2	1	OV	Или: плоху квашню не перепечешь - худу бабу не переделаешь.	переделать
его грехи	greh	грех	2	0	OV	Человек грешит, ты видишь, а назавтра ты его грехи забудь.	забыть
нашу крысу	krysa	крыса	2	0	OV	- Я думаю, самый лучший Дима Быков нарисовал и тащил: "Не раскачивайте лодку, нашу крысу тошнит".	тошнить
какое отношение	otnoshenie	отношение	2	1	OV	Но какое отношение это имеет к социологии как науке?	иметь
свой электорат,	elektorat	электорат	2	4	OV	Но свой электорат, безусловно, она имеет.	иметь
эти нормы	norma	норма	2	0	OV	Но если эти нормы выводят из изжившей себя системы, существующей властью олицетворяемой, то такой прагматизм уместен.	выводить
разные вопросы	vopros	вопрос	2	0	OV	Современное общество сложно, что называется, по определению; разные вопросы задают прошлому потомки победителей и побежденных, мужчины и женщины, русские и черкесы, крестьяне и рабочие, жители Сибири и Смоленска.	задавать
важность учебника	vazhnost'	важность	2	1	OV	Пожалуй, верно замечено, что важность учебника преувеличивают родители, для которых книга сохранила значение "утвержденного" авторитетного знания.	преувеличивать
некоторые законы	zakon	закон	2	1	OV	Поэтому некоторые законы она создает словно из расчета только на РПЦ.	создавать
Такие теории	teorija	теория	2	1	OV	Такие теории Лакатос называет исследовательскими программами и видит в их конкуренции процесс развития науки.	называть
зловещую бактерию	bakterija	бактерия	2	0	OV	Правда, вскоре многочисленные исследования показали, что зловещую бактерию носит в своих желудках множество людей (в России - около 75% населения).	носить
мою руку	ruka	рука	2	0	OV	"Когда хирурги взялись за мои нервы, ощущение было такое, что мою руку казнят на электрическом стуле, - рассказывает сам Уорвик и добавляет: - Великолепная боль!"	казнить
движения растений	dvizhenie	движение	2	1	OV	В психологии движения растений относят к допсихическому уровню отражения.	относить
Предмет этологии	predmet	предмет	2	1	OV	Предмет этологии составляют законченные, скоординированные поведенческие акты.	составлять
эти выборы	vybory	выборы	2	0	OV	Они были уверены, что эти выборы выиграют, но с треском их проиграли.	выиграть
огромное значение	znachenie	значение	2	0	OV	В осознании боли огромное значение имеют эмоциональное состояние и уровень интеллекта пострадавшего.	иметь
смерть человека	smert'	смерть	2	1	OV	И если в обычной ситуации смерть человека констатирует лечащий врач, реаниматолог, то в этом случае собирают целый консилиум.	констатировать
Такие истории,	istorija	история	2	4	OV	Такие истории, как правило, распространяют санитары и санитарки.	распространять
Каждый голос	golos	голос	2	0	OV	Каждый голос верифицируют электронным способом, через SMS-код.	верифицировать
ведущее место	mesto	место	2	2	OV	Дракер, также написавший в начале 1990-х годов книгу под названием "Посткапиталистическое общество", считал, что посткапитализм наступил, поскольку ведущее место в экономике занимают не собственники, а носители знаний.	занимать
сосуществование которых	sosuschestvovanie	сосуществование	2	1	OV	Все формы собственности, сосуществование которых предполагают теории равноправия, - довольно старые, хорошо известные формы общественных отношений, каждая из которых уже показала свой потенциал и ни одна из которых пока что не породила жизнеспособной альтернативы капитализму.	предполагать
сетевые структуры	struktura	структура	2	0	OV	В трудах, посвященных власти и управлению, сетевые структуры противопоставляют иерархическим, но на самом деле нет никакого жесткого понятийного запрета, который бы не позволял и иерархию назвать сетью особого рода.	противопоставлять
бюджетное финансирование	finansirovanie	финансирование	2	0	OV	Для Германии, например, характерна модель децентрализации: бюджетное финансирование осуществляют региональные и местные власти, а центр выступает лишь как дополнительный источник средств.	осуществлять
этот вопрос,	vopros	вопрос	2	4	OV	Чекист посоветовал мне сейчас ни к кому не обращаться, так как неизвестно еще, как оно обернется, а прийти часикам к четырем утра, зайти со двора, спросить его: он как раз этой ночью будет дежурить, и мы этот вопрос, скорее всего, решим.	решить
примерно половину	polovina	половина	2	0	OV	В дикой природе они постоянно издают звуки, из которых примерно половину составляют свисты,индивидуальные для каждого животного.	составлять
Эти звуки	zvuk	звук	2	2	OV	Эти звуки молодые дельфины перенимают от матери, однако копирование не является "дословным".	перенимать
ключевую роль	rol'	роль	2	0	OV	Чтобы показать, что и в данном случае ключевую роль играет FOXP2, ученым сначала пришлось прибегнуть к помощи модельных животных.	играть
Подобные деревья	derevo	дерево	2	2	OV	Подобные деревья уже давно составляют лингвисты, и с ними действительно интересно сопоставить полученные данные.	составлять
Гламурную экзотику	ekzotika	экзотика	2	2	OV	Гламурную экзотику массовому потребителю предоставляют тематические рестораны, клубы, отели, парки, которые предлагают разные сервисы, но стоимость создают одинаково - вживлением экзотики в блюда, развлекательные программы, дизайн интерьеров.	предоставлять
стандарт благополучия	standart	стандарт	2	1	OV	Потому что стандарт благополучия задают не они, а те предприниматели и профессионалы, которые капитализируют гламур и отрываются от них по уровню доходов и стилю жизни.	задавать
нашу жизнь	zhizn'	жизнь	2	0	OV	В конце XX века лидер постмодернизма в философии и социологии Жан Бодрийяр определял общество как тотальную симуляцию: мы теряем связь с реальностью, потому что нашу жизнь наполняют создаваемые корпорациями, масс-медиа, политиками и учеными симулякры - копии без оригинала.	наполнять
секретное оружие	oruzhie	оружие	2	3	OV	Во-первых, собственных ресурсов не всегда хватает для финансирования закупок, а во-вторых, секретное оружие вам вряд ли продаст конкурент в военно-политической сфере.	продать
какую оценку	otsenka	оценка	2	1	OV	Однако вне зависимости от того, какую оценку мы ставим модернизации (мне лично ближе первая точка зрения), трудно усомниться в определяющем влиянии на нее демонстрационного эффекта.	ставить
Сетевую организацию	organizatsija	организация	2	2	OV	Сетевую организацию чемоданами не профинансируешь.	финансировать
каждого наблюдателя	nabljudatel'	наблюдатель	2	0	OV	И теперь каждого наблюдателя вызывают, как написано, "по налоговым нарушениям".	вызывать
и суды	sud	суд	2	0	OV	Минюст прогнулся под этот закон, и если политический заказ такого уровня мог прогнуть даже Минюст, то и суды прогнут.	прогнуть
такой ужас	uzhas	ужас	2	0	OV	Пусть бы он рассказал совету, почему у него такой ужас вызывают НКО.	вызывать
все это	eto	это	2	0	OV	А все это баламутят те, кто непосредственно сидит на грантах.	баламутить
взрослых мальчиков	mal'chik	мальчик	2	0	OV	И тут начался ужасный крик: "Совсем с ума посходили, взрослых мальчиков приводят в женское отделение!"	приводить
Все это	vse	все	2	3	OV	Все это опытный разведчик заметит.	заметить
Нужную сумму	summa	сумма	2	0	OV	Нужную сумму проставите сами.	проставить
левую ногу	noga	нога	2	1	OV	И тебе левую ногу тоже сделают.	делать
голову офицера	golova	голова	2	1	OV	До этого Хаттаб в другом интервью Kavkaz.org сообщил, что голову офицера подбросит на кладбище в Урус-Мартановском районе Чечни, где похоронена убитая Будановым Эльза Кунгаева, а тело обменяет на трупы боевиков.	подбросить
Лидирующие позиции	pozitsija	позиция	2	3	OV	Лидирующие позиции в этом отношении занимают Приморский и Хабаровский края, а также Сахалинская область.	занимать
население России	naselenie	население	2	1	OV	Судя по вопросам, население России волнует положение в образовании, науке и культуре.	волновать
Остальные деньги	den'gi	деньги	2	1	OV	"Остальные деньги они получат позже, - сказал министр.	получить
региональных законодателей	zakonodatel'	законодатель	2	0	OV	Также региональных законодателей проинформируют о том, как их инициативы проходят через палаты Федерального собрания.	информировать
какое наказание	nakazanie	наказание	2	1	OV	Департамент по юридическим делам несовершеннолетних после консультаций с полицией вынесет решение о том, будут ли им предъявлены обвинения и какое наказание они понесут, передает РИА "Новости".	понести
боевиков которых	boevik	боевик	2	2	OV	В число нелегальных входят "Лашакр-е-тайяба" и "Джаищ-е-Мухаммад", боевиков которых Индия обвиняет в нападении на здание парламента в Дели 13 декабря.	обвинять
какие цели	tsel'	цель	2	0	OV	"Нам нет дела до того, какие цели преследует вирусописатель, мы только боремся с его творчеством, - говорят в антивирусной компании Network Associates.	преследовать
конец сезона	konets	конец	2	4	OV	Американский полузащитник украинского происхождения Дмитрий Коваленко, выступавший за "Чикаго Файр", конец сезона на правах аренды проведет в клубе немецкой бундеслиги "Санкт-Паули" из Гамбурга.	провести
российскую делегацию	delegatsija	делегация	2	2	OV	Как стало известно из дипломатических источников в Москве, российскую делегацию на консультациях возглавит заместитель министра иностранных дел Евгений Гусаров.	возглавить
Анесудина Ахмеда	Anesudin	Анесудин	2	1	OV	По информации сотрудников посольства, 19 марта Анесудина Ахмеда примет заместитель министра иностранных дел России Анатолий Сафонов.	принять
таблетки метамфетамина	tabletka	таблетка	2	2	OV	По официальной статистике министерства здравоохранения Таиланда, таблетки метамфетамина регулярно употребляют более 4 % жителей страны.	употреблять
Основу автопарка	osnova	основа	2	1	OV	Основу автопарка составят "Волги".	составить
Такое мнение	mnenie	мнение	2	0	OV	Такое мнение высказывает сегодня британская Guardian.	высказывать
европейские рынки	rynok	рынок	2	1	OV	Тем не менее европейские рынки тоже ждет падение.	ждать
дело - то	delo	дело	2	3	OV	Ну дело-то он знает!	знать
вторую водку	vodka	водка	2	5	OV	Водка проскочила, будто ее и не было; вторую водку за ту же смерть не купишь.	купить
парнишку - то	parnishka	парнишка	2	2	OV	Приходила тетя Шура управдомша: "Опомнись, Настя, парнишку - то пожалей".	жалеть
парня твоего	paren'	парень	2	2	OV	И парня твоего не бросят люди, спасут.	бросить
этих фашистов	fashist	фашист	2	0	OV	- Ну до чего я этих фашистов ненавижу, - тонким голосом сказала она.	ненавидеть
Слово " беззаботный "	slovo	слово	2	4	OV	Слово "беззаботный" обычно сопровождает представление о счастье.	сопровождать
Наибольшую опасность	opasnost'	опасность	2	0	OV	Наибольшую опасность представляет загрязнение атмосферного воздуха в городах.	представлять
не все	vse	все	2	2	OV	Конечно, не все мы еще можем, во многом мы ограничены в правах, нередко нас справедливо критикуют.	мочь
Работу эту	rabota	работа	2	1	OV	Работу эту проводим вместе с инспекциями Минздрава СССР и Минводхоза СССР.	проводить
Л. Скрягина	L.	Л.	2	1	OV	И вдруг Л. Скрягина приглашают в кабинет первого секретаря обкома и предлагают стать министром.	приглашать
всю настройку	nastrojka	настройка	2	0	OV	Он прост в обслуживании, ибо всю настройку берет на себя запоминающее устройство микропроцессора.	брать
Перепад давления	perepad	перепад	2	1	OV	Перепад давления обеспечивают расположенные вдоль трассы воздуходувные станции, расходующие в среднем не более 1 квт-ч энергии на тоннокилометр перевозки.	обеспечивать
подобные сооружения	sooruzhenie	сооружение	2	0	OV	Вслед за Москвой и Ленинградом подобные сооружения получат Киев, Ташкент, Сочи, Омск, Новосибирск, несмотря на трудности их создания в больших, давно застроенных городах.	получить
Такую развертку	razvertka	развертка	2	0	OV	Такую развертку отправляют в металлолом вместе со сломанными под корешок сверлами и метчиками.	отправлять
этот парадокс	paradoks	парадокс	2	0	OV	Быть может, этот парадокс объяснит судьба резальной машины, изготовляемой Роменским заводом полиграфических машин.	объяснить
Такую прокатку	prokatka	прокатка	2	0	OV	Такую прокатку называют электростимулированной.	называть
Другой поток	potok	поток	2	1	OV	Другой поток либо отводят в сторону, либо пропускают через другие мембраны для извлечения других компонентов.	отводить
Эту энергию	energija	энергия	2	1	OV	Эту энергию и дает электрическое поле: ионы начинают двигаться туда, где их больше, то есть концентрироваться.	давать
это движение	dvizhenie	движение	2	1	OV	Чисто по-человечески можно предположить, что вы, лидер комсомола, это движение тоже воспринимаете без особого энтузиазма.	воспринимать
особый интерес	interes	интерес	2	0	OV	Конечно, особый интерес проявляют критики социализма, антикоммунисты.	проявлять
огромную роль	rol'	роль	2	0	OV	Кроме отсутствия опыта движения по новым дорогам, огромную роль играет то, что в мире существуют противоположные социально-экономические и политические системы - социализм и капитализм.	играть
Иркутскую жизнь	zhizn'	жизнь	2	1	OV	Иркутскую жизнь я помню всю изо дня в день, там не было ничего второстепенного, его и вообще не бывает на переломе жизни, пусть даже детской.	помнить
это жилье	zhil'e	жилье	2	0	OV	Я это жилье помню с неходячего возраста.	помнить
Довоенный Крестовский	krestovskij	крестовский	2	4	OV	Довоенный Крестовский, помимо жилья, помню плохо.	помнить
эти условия	uslovie	условие	2	4	OV	Киев эти условия до сих пор не признает.	признавать
Таможенный союз	sojuz	союз	2	4	OV	Таможенный союз в этих регионах не рассматривают как направление интеграции, однако многие считают необходимым сохранять нейтралитет, не присоединяясь ни к тому, ни к другому объединению.	рассматривать
Их записку	zapiska	записка	2	3	OV	Их записку мы в ЦК согласуем.	согласовать
что хочешь	chto	что	2	1	OV	Это же делается по радио простым условным сигналом, который сразу до всех дойдет, и за два часа они что хочешь сделают.	сделать
эти санкции	sanktsija	санкция	2	0	OV	Наверное, и те, кто эти санкции придумывает и просчитывает, не ставят себе целью, чтобы здесь были угнетены те люди, которые в целом относятся к дружбе России с Западом позитивно.	придумывать
свою задачу	zadacha	задача	2	0	OV	Мы свою задачу видим в том, чтобы продвинуть характеристики детектора, с минимальными потерями сопрячь его с системой квантовой криптографии и получить наилучшие результаты.	видеть
какие методы	metod	метод	2	1	OV	- Нет, смог, но мы поняли, какие методы он использует.	использовать
Смысл его	smysl	смысл	2	4	OV	Смысл его она как раз видит в разделе сфер влияния.	видеть
Эти голоса	golos	голос	2	0	OV	Эти голоса подбирают политики, играющие на национализме, антиамериканизме и популизме.	подбирать
эту ответственность	otvetstvennost'	ответственность	2	4	OV	И эту ответственность на одного капитана не спишешь, хотя вину я бы с него тоже не снимал.	списать
демократические силы	sila	сила	2	0	OV	Похожая ситуация происходит в Калужской области, где демократические силы представляет "Гражданская инициатива".	представлять
огромный интерес	interes	интерес	2	0	OV	Тут огромный интерес представляют сведения, сообщаемые Плутархом о древнеафинском полководце Никии.	представлять
его личность	lichnost'	личность	2	3	OV	Я его личность уже с трудом различаю, где тут он сам и кто реально действует.	различать
эти мутации	mutatsija	мутация	2	2	OV	За это время много разных мутаций возникло, и эти мутации мы сейчас видим на востоке Украины.	видеть
все это	eto	это	2	2	OV	Его все время рассматривают как динамик, вещающий из кабинета Путина, будто бы все это сам Путин говорит.	говорить
культурное наследие	nasledie	наследие	2	0	OV	Теперь другая "игла": культурное наследие осваивают как залежи ископаемых, к которым под любыми углами подводят скважины, трубу и кран - распределитель смыслов и ценностей.	осваивать
этот риск	risk	риск	2	1	OV	С большой долей вероятности можно утверждать, что даже повышенный уровень страховых выплат, который сейчас закладывается законодателями, этот риск не компенсирует, потому что речь будет идти о выживании наиболее слабых банков.	компенсировать
часть денег	chast'	часть	2	1	OV	В первом случае банк кредитует реального заемщика, который по договоренности часть денег использует в собственных целях, а часть (до 80%) направляет лицам, указанным банком.	использовать
Этот момент	moment	момент	2	2	OV	Этот момент мы и называем - "сознание".	называть
Ведь поэзию	poezija	поэзия	2	0	OV	Ведь поэзию пишут, любят и понимают хоть и многие, но далеко не все.	писать
не схему	shema	схема	2	0	OV	Но недопустима ложная стандартизация, когда ученика подгоняют под образовательную схему, а не схему настраивают под ученика.	настраивать
не бензин	benzin	бензин	2	0	OV	Он говорит, что не знает, что это за машина едет за ним, в его время таких не было, но по конструкции ясно, что не бензин везет.	везти
Многие слова	slovo	слово	2	1	OV	Многие слова мы употребляем неправильно с точки зрения формальных правил.	употреблять
Эти слова	slovo	слово	2	2	OV	Эти слова мало кто знает.	знать
какой смысл	smysl	смысл	2	1	OV	Как же выяснить, какой смысл люди вкладывают в то или иное слово?	вкладывать
эту игру	igra	игра	2	0	OV	Среди пользователей "ВКонтакте" эту игру знают 77 % опрошенных, 23 % не знают.	знать
это слово	slovo	слово	2	0	OV	Но в "Фейсбуке", где окружение постарше, это слово знает гораздо меньше людей.	знать
только душу	dusha	душа	2	1	OV	Душегрейка, напротив, это что-то для девушек, небольшое - только душу и греет.	греть
слово " чашка "	slovo	слово	2	3	OV	Оказалось, что современные школьники слово "чашка" используют редко.	использовать
Эти аргументы	argument	аргумент	2	0	OV	Эти аргументы разделяют католики и православные.	разделять
Относительное прилагательное	prilagatel'noe	прилагательное	2	1	OV	Относительное прилагательное он использует как качественное, метафорически, и это позволяет ему достичь большей выразительности.	использовать
Эпоху Ельцина	epoha	эпоха	2	1	OV	Эпоху Ельцина называют десятилетием упущенных возможностей, временем великих надежд и разочарований.	называть
такие услуги	usluga	услуга	2	1	OV	Учтите, что это работа и такие услуги мы оплачиваем.	оплачивать
эти заявления	zajavlenie	заявление	2	1	OV	Хмельницкий тут же ответил, что эти заявления он рассматривает как клеветнические.	рассматривать
Эту должность	dolzhnost'	должность	2	1	OV	Эту должность он занимает более десяти лет, вплоть до отставки патрона в 1963-м.	занимать
Этот день	den'	день	2	1	OV	Этот день мы отмечаем как день единства армии и народа, всех тех, кто защищал, защищает и готов защищать нашу Родину.	отмечать
все это	eto	это	2	0	OV	Союзники боялись, что большевики все это продадут немцам.	продать
какую пайку	pajka	пайка	2	0	OV	Узнала, какую пайку получают заключенные, сколько шагов взад-вперед можно сделать по камере, как часто им разрешается получать письма, и создала себе точно такие же условия.	получать
что именно	chto	что	2	2	OV	Я хотел было спросить, что именно он имеет с мяса, чтобы установить, что имеет директор комбината, но не решился.	иметь
какой маршрут	marshrut	маршрут	2	1	OV	В этих поездках помимо отдыха среди пробуждающейся природы нам предстояло решить важный вопрос, какой маршрут мы выбираем для летнего многодневного путешествия.	выбирать
Пенсионный возраст	vozrast	возраст	2	0	OV	Пенсионный возраст повысят после президентских выборов.	повысить
розовый запах	zapah	запах	2	0	OV	Прокуратору казалось, что розовый запах источают кипарисы и пальмы в саду, что к запаху кожи и конвоя примешивается проклятая розовая струя.	источать
как вы	mjatezhnik	мятежник	2	2	OV	Теперь полетит весть от меня, да не наместнику в Антиохию и не в Рим, а прямо на Капрею, самому императору, весть о том, как вы заведомых мятежников в Ершалаиме прячете от смерти.	прятать
монастырскую капусту	kapusta	капуста	2	0	OV	То его пугало, что монастырскую капусту занесет и ее не откопают, то что в поле заметет маму, и она бессильна будет оказать сопротивление тому, что уйдет еще глубже и дальше от него в землю.	занести
все это	eto	это	2	0	OV	Он был уверен, что когда он вырастет, он все это распутает.	распутать
Необходимые средства	sredstva	средства	2	1	OV	Необходимые средства обычно получают из бюджета штата и от частных инвесторов.	получать
Основной доход	dohod	доход	2	0	OV	Основной доход получают от продажи билетов - ежегодный театральный праздник собирает более 150 000 зрителей.	получать
что-нибудь там	chto-nibud'	что-нибудь	2	2	OV	- Нет, нет, - отводя глаза, вежливо ответил Селивановский, - вы что-нибудь там сами сочините.	сочинить
Какое отношение	otnoshenie	отношение	2	8	OV	Какое отношение Научно-исследовательский финансовый институт при Минфине и вы лично имеете к проекту правительства по повышению пенсионного возраста?	иметь
что-то такое	chto-to	что-то	2	1	OV	На одном мрачные работяги что-то такое оттирают руками, сидя в окружении нескольких ровных пирамид, составленных из небольших круглых (явно металлических) шаров.	оттирать
социальное такси	taksi	такси	2	0	OV	Как ты социальное такси запустишь?	запустить
эти полномочия	polnomochie	полномочие	2	2	OV	Мы обжаловали решение мэра в прокуратуре, и эти полномочия я себе верну.	вернуть
это все	eto	это	2	1	OV	Начиная от того, где родился, в каких климатических условиях жил, кем работали родители, как проходили у матери роды, но, конечно, если он это все помнит и знает.	помнить
Что еще	chto	что	2	1	OV	Что еще делают эксперты с человеком, чтобы распознать аффект?	делать
что же	chto	что	2	2	OV	Она долго соображала, что же оно означает.	означать
этого человека	chelovek	человек	2	1	OV	Для меня совершенно очевидно, что если будет принято волевое решение, то этого человека немедленно экстрадируют и будут судить в России за совершенные им преступления.	экстрадировать
главный удар	udar	удар	2	0	OV	Но главный удар наносит группа армий "А".	наносить
Вашу виновность	vinovnost'	виновность	2	0	OV	Один из сталинских любимцев заместитель министра госбезопасности Михаил Дмитриевич Рюмин сформулировал это предельно точно: - Вашу виновность доказывает факт вашего ареста.	доказывать
Зал заседаний	zal	зал	2	1	OV	Зал заседаний наполняют сакральные тексты: "Высокая субъективность когнитивного осмысления…", "Гендерная неточность силлабического манифеста…", "Культуроведческий дискурс лирического откровения…", "Автобиографичность мировосприятия - альтер-эго самого автора…".	наполнять
всю группу	gruppa	группа	2	0	OV	Твоя "Дикая собака" получила в Венеции приз, и всю группу приглашают в Сочи.	приглашать
и баобабы	baobab	баобаб	2	1	OV	- Значит, они и баобабы тоже едят?	есть
и цветы	tsvety	цветы	2	0	OV	Он спросил неожиданно, без предисловий, точно пришел к этому выводу после долгих молчаливых раздумий: - Если барашек ест кусты, он и цветы ест?	есть
Что это	chto	что	2	2	OV	#NAME?	делать
Что же	chto	что	2	4	OV	Что же ты с ними делаешь?	делать
что же	chto	что	2	2	OV	#NAME?	делать
что же	chto	что	2	4	OV	#NAME?	делать
Рассказы путешественников	rasskaz	рассказ	2	2	OV	Рассказы путешественников сначала записывают карандашом.	записывать
что ж	chto	что	2	1	OV	Ты что ж думаешь, если б эту змею можно было так запросто достать и в руки взять, то ее бы к нам привезли?	думать
Программу эту	programma	программа	2	2	OV	Программу эту он осуществляет без всякой генной инженерии, путем обычного скрещивания подходящих экземпляров и отбраковывания неподходящих.	осуществлять
Достижения эти	dostizhenie	достижение	2	2	OV	Достижения эти мы называем цивилизацией: у нас есть потребительские товары в красивых упаковках, парламенты, искусство и, конечно, наука.	называть
обладателей которого	obladatel'	обладатель	2	2	OV	И так ли уж замечателен этот дар, которым мы кичимся и обладателей которого мы разыскиваем по всему космосу: один венец творения, окликающий воображаемого другого?	разыскивать
я деньги	den'gi	деньги	2	1	OV	Он к нему: мол, мужик, дай я деньги твои потрогаю.	потрогать
деньги мои	den'gi	деньги	2	3	OV	Напиши, говорит, мне только свою фамилию и номер свидетельства пенсионного страхования СНИЛС, а деньги мои в покое оставь, у тебя скоро столько их будет, что ты их считать замучаешься.	оставить
вот что	chto	что	2	1	OV	И вот что человек пишет: - Когда я не вижу Вас, - пишет он, не заботясь о рифме, ни даже о знаках препинания (притом что доктор гуманитарных наук), - Сердце ноет Уши вянут Губы сохнут Глаз слезится Стынет кровь Ноги зябнут Вера гаснет Силы тают Зубы стынут Тянет спину Давит грудь Изменяется походка Повышается давленье Нарушаются движенья Руки падают безвольно И кружится голова.	писать
это всё	eto	это	2	1	OV	Я спрашивала у деда, кто такая боярыня Морозова, почему у нее такое гневное выражение лица, почему она держит два пальца вверх, куда ее везут, но как это всё объяснишь маленькому ребенку?	объяснить
Вот что	chto	что	2	0	OV	Вот что говорит Лунная ночь Куинджи.	говорить
атомные подлодки	podlodka	подлодка	2	1	OV	В США и Британии атомные подлодки тоже списывают, и есть основания считать, что рано или поздно большая часть ОЯТ вкупе с самыми облученными деталями окажется глубоко под землей.	списывать
этот мусор	musor	мусор	2	0	OV	Но улицы ухоженные, всюду сжигают мусор, а также постоянно этот мусор сметают в кучи - чувствуется, что народ чистоплотный.	сметать
Бойцовых петухов	petuh	петух	2	0	OV	Бойцовых петухов продают повсюду, но где посмотреть, как они дерутся?	продавать
вот что	chto	что	2	1	OV	И вот что я замечаю.	замечать
" Родину - мать "	rodina	родина	2	3	OV	Поскольку сооружение безнадежно испортило вид на Киево-Печерскую лавру, многие киевляне "Родину-мать" называют "Лаврентьевной".	называть
что-нибудь приятное	chto-nibud'	что-нибудь	2	1	OV	#NAME?	услышать
что-нибудь приятное	chto-nibud'	что-нибудь	2	1	OV	Разве что-нибудь приятное услышишь, как сказал бы Ф…	услышать
своих детей	rebenok	ребенок	2	1	OV	Жалеют, наоборот, что мало были с детьми (это говорю я, которая своих детей не видит вообще), жалеют, что расстались из-за каких-то амбиций с мужем или с женой, жалеют, что не жили полной жизнью.	видеть
эти гримасы	grimasa	гримаса	2	0	OV	Их львиная доля скрыта от дилетантов, но специалисты эти гримасы знают назубок.	знать
бедный рубль	rubl'	рубль	2	0	OV	Наивно было бы думать, что бедный рубль атакуют только валютные рынки.	атаковать
этот процесс	protsess	процесс	2	0	OV	Нагляднее всего этот процесс показывает демография, которая в последнее время все решительнее становится хозяйкой экономического роста.	показывать
потребности людей	potrebnost'	потребность	2	1	OV	Ведь точнее всех факторов потребности людей определяет возраст, ожидаемая продолжительность жизни, число детей и стариков.	определять
эту модель	model'	модель	2	0	OV	Вот как эту модель описывает известный экономист Алексей Михайлов.	описывать
эти убытки	ubytok	убыток	2	1	OV	Так что дополнительные деньги эти убытки только преумножат - ведь бюрократия быстрее не стала шевелиться даже в кризис.	преумножить
такой опыт,	opyt	опыт	2	7	OV	Но в России такой опыт, что называется, в упор не видят.	видеть
отечественные бумаги	bumaga	бумага	2	1	OV	Тем более сегодня, когда мировые агентства снизили суверенный рейтинг России до "предмусорного", а это значит, что отечественные бумаги не купит никто в здравом уме, как мы и видим по индексу Российской фондовой биржи.	купить
важнейшее место	mesto	место	2	0	OV	В суммарном анализе основы идентичности Италии важнейшее место занимает городская культура, культура итальянской коммуны и её наследие: ведь Италия на протяжении длительного периода своей истории оставалась страной городов - явление, не столь заурядное в европейском Средневековье.	занимать
такой погриб	pogreb	погреб	2	0	OV	Я тоже такой погриб хочу	хотеть
не все	vse	всё	2	0	OV	Я тоже не все понимаю в этой системе.	понимать
эти деньги	den'gi	деньги	2	0	OV	Если денег нет, лучше эти деньги направьте на долгосрочное решение проблемы Пенсионного фонда: создание рабочих мест, увеличение зарплат и другое	направить
Родину свою	rodina	родина	2	1	OV	Хоть Родину свою люблю, со всею нежностью ❤️❤️❤️😊.	любить
углы прохожие	ugol	угол	2	1	OV	уж я на статуе сижу безбрежною листвой углы прохожие слежу любезной головой	следить
нашатырь туманный	nashatyr'	нашатырь	2	1	OV	птица гусь в зелёной шляпе ищет веточек на лапе ни кровинки на кольце ни соринки на лице оживает и поёт нашатырь туманный пьёт	пить
мёртвый труп	trup	труп	2	0	OV	я выхожу из кабака там мёртвый труп везут	везти
мона … монашенку	monashenka	монашенка	2	2	OV	пока интересуюсь я спросить кто приказал нам долго жить кто именно лежит в коробке подобно гвоздику иль кнопке и слышу голос с небеси мона… монашенку спроси	спросить
что же	chto	что	2	1	OV	тут горе говорит но что же делает тушканчик давайте братцы поглядим	делать
все сомненья	somnen'e	сомненье	2	0	OV	все сомненья разобьём в мире царствует объём	разбить
суп наперченный	sup	суп	2	1	OV	говорил философ Кант: я хотя не музыкант но однако понимаю звуков чудную игру часто мысли вынимаю и гуляю на пиру суп наперченный вкушаю ветчину и рыбу ем	вкушать
дней тарелку	tarelka	тарелка	2	0	OV	скажет мёртвый наконец вижу туловище Бога вижу грозные глаза но могила как берлога над могилою лоза умираю умираю и скучаю и скорблю дней тарелку озираю боль зловещую терплю	озирать
боль зловещую	bol'	боль	2	1	OV	скажет мёртвый наконец вижу туловище Бога вижу грозные глаза но могила как берлога над могилою лоза умираю умираю и скучаю и скорблю дней тарелку озираю боль зловещую терплю	терпеть
эти корки	korka	корка	2	0	OV	Дальше я эти корки замачиваю.	замачивать
ватный диск	disk	диск	2	1	OV	А ватный диск не одолжите?	одолжить
растворенный сироп	sirop	сироп	2	0	OV	Сахар заливают водой (полстакана) и нагревают до растворения сахарных крупинок; растворенный сироп доводят до кипения, на оставшемся количестве воды (полстакана) варят кофе, который ставят на край плиты для настоя.	доводить
Вот это	eto	это	2	1	OV	Вот это я понимаю.	понимать
всех крымнашцев	krymnashets	крымнашец	2	2	OV	А тут всех крымнашцев без воды держут!	держать
какие поступки	postupok	поступок	2	0	OV	Важно то, о чем ты думаешь и какие поступки совершаешь.	совершать
эти картинки	kartinka	картинка	2	0	OV	Россия это сверхдержава, а эти картинки показывай хохлам.	показывать
Активистов " Яблока "	aktivist	активист	2	3	OV	RT @xxxxxx: Активистов "Яблока" запугивают и избивают.	запугивать
всех указаных	ukazat'	указать	2	0	OV	@Zhirinovskiy всех указаных расстреливают на границе.	расстреливать
эти основания	osnovanie	основание	2	0	OV	Даже я эти основания вижу, @xxxxxx.	видеть
Рекомендованную дозу	doza	доза	2	3	OV	Рекомендованную дозу непосредственно перед применением разводят физраствором до объема 3–4 мл.	разводить
второе место	mesto	место	2	1	OV	Лучшим противозачаточным средством 2011 года признана ипотека, второе место прочно удерживает новая иномарка, взятая в кредит.	удерживать
Историю народа	istorija	история	2	1	OV	Историю народа определяет литературные произведения, а у армян их просто нет, как и в своей кухни споашь турецкие и азербайджанские имена не поменяли; ляля-кебаб, бастурма, пити, долма, шашлык, дюшбара, бозбаш, а о фамилияэ армян зазорно им признать, что они все носят турецкиеи ничем это не могут скрыть.	определять
эти тарифы	tarif	тариф	2	0	OV	:) и поднимают тарифы - а народ жаждет видеть у власти тех кто эти тарифы отменит- но нужно не тарифы опускать- а зарплаты поднимать- а чтоб это сделать нужен базис в виде растущей экономики и промышленности- и вы меня упрекали в том- что на НИБУЛОНЕ СТРОЯТ БАРЖИ( калоши!)	отменить
не всё	vse	всё	2	0	OV	сударь Смит не всё напишете в письме	написать
любовников объятья	ob'jat'e	объятье	2	0	OV	Когда любовников объятья вижу вновь Мне ничего уже не надо только взоры Усталых глаз закрыть забыть дрожащий сад Где красные кусты смородины хрипят И дышат лютостью святою пасифлоры.	видеть
Кожу их	kozha	кожа	2	4	OV	Сильней Кожу их, чуяли, студит Ветер с Полночных Огней.	студить
светлую пену	pena	пена	2	1	OV	Когда мы сойдемся за круглым столом, Который для дружества тесен, И светлую пену полнее нальем Под гул восклицаний и песен, Когда мы над пиршеством сдвинем хрусталь И тонкому звону бокала Рокочущим вздохом ответит рояль, Что время разлук миновало, -- В сиянии елки, сверканье огней И блестках вина золотого Я встану и вновь попрошу у друзей Простого заздравного слова.	налить
модный романтизм	romantizm	романтизм	2	2	OV	Хоть модный романтизм подчас я осуждаю, Но истинный талант люблю и уважаю.	осуждать
истинный талант	talant	талант	2	0	OV	Хоть модный романтизм подчас я осуждаю, Но истинный талант люблю и уважаю.	любить
Зарплату обещанную	zarplata	зарплата	2	2	OV	Зарплату обещанную не платят, с пьяницами.	платить
Слова утешенья	slovo	слово	2	3	OV	Слова утешенья всегда он найдет.	найти
" Дело Васильевой "	delo	дело	2	2	OV	"Дело Васильевой" оценивают уже в 16 миллиардов	оценивать
хороших жён	zhena	жена	2	1	OV	Сейчас хороших жён не ищут в клубах, на дискотеках и в баре, а отбивают у дураков, которые их не ценят.	искать
место Фрадкова	mesto	место	2	1	OV	По версии Белковского, место Фрадкова займет человек вроде Дмитрия Козака.	занять
версию поджога	versija	версия	2	1	OV	Однако арендаторы версию поджога исключают.	исключать
твой взор	vzor	взор	2	0	OV	Ах, сей ли гроб твой взор мятет, Где ляжет токмо плоть и кровь?	мясти
смесь низколактозную	smes'	смесь	2	1	OV	Так происходит когда у ребенка не хватает ферментов для переваривания пищи, смесь скорее дают низколактозную, так как ребенок может рвать как раз от того, что не может переварить лактозу, а в молоке мамы ее тоже может быть много.	давать
Схему лечения	shema	схема	2	1	OV	Схему лечения прилагаю в фото.	прилагать
всех покупателей	pokupatel'	покупатель	2	0	OV	Народу и так немного,а так всех покупателей растеряете!	растерять
его мнение	mnenie	мнение	2	1	OV	Сужу по отзывам соседей, знакомых и СТАРШЕГО СЫНА (младший только пойдёт в д/с в сентябре, так что его мнение не учитываю).	учитывать
ценник конский	tsennik	ценник	2	1	OV	И ценник конский выкатывают.	выкатывать
Замечательное вино	vino	вино	2	0	OV	Замечательное вино производят на этом заводе!	производить
товар акционный	tovar	товар	2	2	OV	После начала скидочной акции товар акционный тележками прячут в подсобку.	прятать
Отличное вино	vino	вино	2	0	OV	Отличное вино делают в Крыму!	делать
Такие магазины	magazin	магазин	2	2	OV	Такие магазины часто не посещаю.	посещать
все - всё	vse	всё	2	2	OV	Экскурсовод все-всё расскажет.	рассказать
Растительные масла	maslo	масло	2	0	OV	Растительные масла заезжаю в первую очередь туда.	заезжать
свое дело	delo	дело	2	0	OV	По гражданским делам продолжаю сюда наведываться время от времени - особых претензий к работе нет, судьи и сотрудники аппарата свое дело делают.	делать
ручную кладь	klad'	кладь	2	0	OV	Впускают только через рамку, ручную кладь пропускают через ленту.	пропускать
что то	chto-to	что-то	2	1	OV	Постоянно там что то покупаем.	покупать
свой заказ	zakaz	заказ	2	1	OV	Адрес прикреплён к определенному кафе, и если оно не может исполнить его, вы никоим образом свой заказ не получите.	получить
Парикмахерскую эту	parikmaherskaja	парикмахерская	2	1	OV	Парикмахерскую эту люблю!	любить
электронное приложение	prilozhenie	приложение	2	1	OV	Часто работает один сотрудник на выдачу посылок и электронное приложение не спасает, когда бабушки приходят платить за ком. услуги или пенсию получать	спасать
Больший зал	zal	зал	2	0	OV	Больший зал заливает водой во время дождя, неудачное освещение.	заливать
Торговые площади	ploschad'	площадь	2	1	OV	Торговые площади Ярослав сокращает, не уютно между рядами, толкаемся корзинами и попами!	сокращать
свою работу	rabota	работа	2	0	OV	Фармацевты свою работу любят!	любить
весь вид	vid	вид	2	0	OV	Не нравится стройка перед 42 домом, весь вид закроет, и куда машины будут парковать новые соседи с Снегирей, и из за этой стройки закрыли удобный проход к остановке "Библиотека Жар птица", приходится делать большой круг, чтобы попасть на остановку, а у меня мама еле ходит, бывает такси даже отказывают в приезде на солнечный, так ей приходится ходить на автобусную остановку "Снегири" , машины у на…	закрыть
Какие слова	slovo	слово	2	0	OV	Какие слова знают и понимают только люди работающие в сфере туризма?	знать
ВСЕ страны	strana	страна	2	0	OV	А сколько человек будет прибывать если ВСЕ страны откроют?	открыть
цену приблизительную	tsena	цена	2	2	OV	И цену приблизительную если знаите.	знать
Другие сапоги	sapog	сапог	2	1	OV	Другие сапоги не признаю.	признать
Какие формы	forma	форма	2	0	OV	Какие формы используете?	использовать
только продукты	produkt	продукт	2	0	OV	Говорит, только продукты перевожу.	переводить
Срез косой	srez	срез	2	0	OV	Срез делаю косой под водой, воды наливаю много.	делать
воды много	voda	вода	2	0	OV	Срез делаю косой под водой, воды наливаю много.	наливать
её мужа	muzh	муж	2	0	OV	Хотя поначалу она его обвиняла в том что он не предупредил их о том что её мужа убьют.	убить
пару недель	para	пара	2	3	OV	Купил новую гитару, пару недель на ней играю.	играть
и деньги	den'gi	деньги	2	0	OV	Так они за это ещё и деньги платят...	платить
и всех	vse	все	2	0	OV	Можно спокойно проехать или нужно сдавать анализ на ковид и всех трясут на этот ковид или можно спокойно доехать до Рф на попутке через границу?	трясти
что же	chto	что	2	1	OV	Девушка посмотрела на старушку думая, что же чувствует тогда она, видя все это.	чувствовать
главную роль	rol'	роль	2	0	OV	Пробовала вспомнить хотя бы актера, кто главную роль исполняет, но никак.	исполнять
такое чудо	chudo	чудо	2	1	OV	Он не работает, получает инвалидность и ни с кем не общается кроме мамы Рассказала своей маме, так она вообще против, сказала что такое чудо не примет, а я каждый день думаю как мне с ним познакомиться Как бы вы поступили?	принять
любовное зелье	zel'e	зелье	2	0	OV	И ещё там была злая зелёная ведьма, которая всё время пыталась чем-то подгадить главным героям - то попытается из Страшилы матрас набить, то волшебнику любовное зелье подсунет, чтоб он на ней женился.	подсунуть
Свой вариант	variant	вариант	2	1	OV	.Свой вариант после скажу	сказать
твой телефон	telefon	телефон	2	2	OV	Изменяют расстаются потом трахаются долгое время с другими детей рожают ни как с тобой не общаются но при этом твой телефон они не удаляют.	удалять
Мою маму	mama	мама	2	1	OV	Мою маму тоже игнорируют.	игнорировать
потенциальных клиентов	klient	клиент	2	0	OV	Фото и видео такие, как будто потенциальных клиентов заманивает.)	заманивать
Дело важное	delo	дело	2	1	OV	Дело важное вершите, Пусть сопутствует успех.	вершить
и смартфоны	smartfon	смартфон	2	0	OV	С тех пор я ее вообще не вижу на улице, раньше она хоть около падика сидела, а теперь вообще ее нет И сам прикол у них электричество нету, синяки может и смартфоны смотрят, а вот ей в 4 стенах да в темноте Мне просто скучно, и вспомнила я про нее Че там вообще может происходить?	смотреть
Комманду " Стоять "	komanda	команда	2	4	OV	Комманду "Стоять" не воспринимает. только в ванной стоит хоть там можно задницу хоть помыть и кое как расчесать.	воспринимать
гамак какой	gamak	гамак	2	1	OV	Что делать? вот реально хоть гамак какой делай чтобы ее подвесить по типу качели, толи еще как.	делать
нервы свои	nerv	нерв	2	2	OV	Я нервы свои не печатаю	печатать
в что	chto	что	2	0	OV	Кот в сапогах шарль перро дисней. я его смотрел в детстве но сейчас его никак не могу найти то в что показывает поиск не тот мультфильм	показывать
что то	chto-to	что-то	2	1	OV	Хоть что то скадите плиззз	сказать
Какие размеры	razmer	размер	2	3	OV	Какие размеры все это дело имеет, что продавцам говорить?	иметь
полностью независимую политику	politika	политика	3	0	OV	На данный момент, из 193 государств мира полностью независимую политику проводят всего три страны -- США, Великобритания и Франция.	проводить
примеры этого понятия	primer	пример	3	2	OV	В случае высказываний ``примеры этого понятия дают нам случаи, когда отдельные слова или утверждения в целом просто понимаются вне их нормальной функции: мы понимаем высказанные утверждения, вопросы, желания, но сами при этом не судим, не спрашиваем и не желаем``.	давать
Память типа DRAM	pamjat'	память	3	3	OV	Память типа DRAM конструктивно выполняют и в виде отдельных микросхем в корпусах типа DIP, SOIC, BGA и в виде модулей памяти типа SIPP, SIMM, DIMM, RIMM.	выполнять
Артёма и Михаила	Artem	Артем	3	3	OV	Артёма и Михаила охрана пропускает, а Ванечку убивает офицер.	пропускать
должность кмета ( старосты )	dolzhnost'	должность	3	4	OV	В местном кметстве Вишна, в состав которого входит Вишна, должность кмета (старосты) исполняет Мехмед Хюсеин Исмаил (Движение за права и свободы (ДПС)) по результатам выборов.	исполнять
индивидуальное существование человека	suschestvovanie	существование	3	1	OV	И здесь Бурдье делает интереснейший ход: индивидуальное существование человека связывает с проблематикой социальных/социологических переменных.	связывать
людей с синдромом	chelovek	человек	3	2	OV	И людей с синдромом компенсируют.	компенсировать
Все мои байки	bajka	байка	3	1	OV	Все мои байки космонавты выкладывают начальству.	выкладывать
Брезент и тот	brezent	брезент	3	2	OV	Брезент и тот прокусывают.	прокусывать
Действия Башкирской прокуратуры	dejstvie	действие	3	3	OV	Это навеяло на старого коммуниста мрачные выводы: "Действия Башкирской прокуратуры я рассматриваю как рецидив прошлого".	рассматривать
Наложение электрического поля	nalozhenie	наложение	3	3	OV	Наложение электрического поля ученые рассматривают как непременное условие ускорения переноса.	рассматривать
Наибольший народнохозяйственный эффект	effekt	эффект	3	3	OV	Наибольший народнохозяйственный эффект новая мембранная технология даст при извлечении ценных или токсичных компонентов из сточных вод либо разбавленных технологических растворов, например, в гидрометаллургических производствах.	дать
Такое примерно утверждение	utverzhdenie	утверждение	3	1	OV	Такое примерно утверждение мы находим у доктора философских наук А. С. Ципко.	находить
Главную свою задачу	zadacha	задача	3	1	OV	Главную свою задачу мы видим в том, чтобы по возможности максимально удовлетворить "голод" на новые идеи и факты.	видеть
Совет по космосу	Sovet	Совет	3	3	OV	По традиции, которая родилась вскоре после запуска первого искусственного спутника Земли, Совет по космосу всегда возглавляет президент Академии.	возглавлять
такой масштабный проект	proekt	проект	3	2	OV	Мне вскоре стало ясно, что такой масштабный проект мы не потянем - в стране была тяжелая финансовая ситуация.	потянуть
То, что упущено,	to	то	3	6	OV	- То, что упущено, уже не вернешь.	вернуть
Не последнее место	mesto	место	3	7	OV	Не последнее место в "выбивании" кредитов для Армении играет армянская диаспора в США и других развитых странах.	играть
стены - то новые	stena	стена	3	3	OV	Но "москвичи" попроще как будто лучше начальства понимают, что снос гостиницы - это не только их личная трагедия: стены-то новые поставят, но в них уже не вернутся ни прежние люди, ни семидесятилетняя история.	ставить
Потенциальных многодетных родителей	roditel'	родитель	3	0	OV	Потенциальных многодетных родителей смущает то, что деньги нельзя потратить на лечение ребенка или покупку садового участка.	смущать
Примерно такую схему	shema	схема	3	2	OV	Примерно такую схему я сейчас вижу.	видеть
кредиты на учебу	kredit	кредит	3	2	OV	В общей сложности кредиты на учебу предоставляют всего полтора десятка банков.	предоставлять
Борьбу с коррупцией	bor'ba	борьба	3	3	OV	Борьбу с коррупцией широковещательно объявляет практически всякая новая власть.	объявлять
право на памятник	pravo	право	3	2	OV	Так, право на памятник имеют:	иметь
Те же данные	dannye	данные	3	0	OV	Те же данные дают опросы только по странам СНГ.	давать
Еще большие перспективы	perspektiva	перспектива	3	0	OV	Еще большие перспективы имеет квартира на первом этаже, ее можно перевести в нежилой фонд и сдавать затем под офис или магазин.	иметь
Естественное природное явление	javlenie	явление	3	1	OV	Естественное природное явление мы сравниваем с чем-то человеческим: гору с пирамидой.	сравнивать
еще бога какого-то	bog	бог	3	1	OV	- Штаны длинные носит, говно сдавать не хочет, пищей брезгует, да еще бога какого-то поминает!	поминать
что же это	chto	что	3	3	OV	- Да что же это вы делаете!	делать
удовольствие от этого	udovol'stvie	удовольствие	3	3	OV	А удовольствие от этого я получаю, как от всякой общественно полезной работы.	получать
всех, что ли,	vse	все	3	5	OV	- А что, - спросил я, - у вас тут всех, что ли, кисками называют?	называть
мятую бумажную скатерть	skatert'	скатерть	3	1	OV	Наконец великан повержен, и мятую бумажную скатерть трогательно укрепляют на веревке бельевыми прищепками, и на ней, ставшей экраном, появляется фотография.	укреплять
ритм и кураж	ritm	ритм	3	2	OV	Ты еще не успеваешь ее разглядеть, как она оживает бурным фрейлехсом, где ритм и кураж задает сам Михоэлс.	задавать
большую часть времени	chast'	часть	3	1	OV	Как известно, человек перемещается путем "падения" с одной ноги на другую и большую часть времени проводит на одной ноге.	проводить
Пересадку костного мозга	peresadka	пересадка	3	4	OV	Пересадку костного мозга уже давно применяют для лечения иммунодефицитов и злокачественных заболеваний крови, и во многих странах мира есть сегодня медицинские банки данных, где собраны сведения о потенциальных донорах костного мозга.	применять
Беседу с режиссером	beseda	беседа	3	2	OV	Беседу с режиссером ведет Татьяна МОСКВИНА.	вести
Национальную водку тарасун	vodka	водка	3	1	OV	Национальную водку тарасун делают из молока и пьют только буряты.	делать
значительную долю рынка	dolja	доля	3	1	OV	Мебель к нам импортируется почти из ста стран, но все же значительную долю рынка занимает продукция Италии и Германии.	занимать
Знания о конкурентах	znanie	знание	3	5	OV	Знания о конкурентах чаще всего фирмы получают из СМИ, на выставках, через дилеров, а такие сведения иногда бывают достаточно противоречивыми.	получать
Основу научных исследований	osnova	основа	3	2	OV	Основу научных исследований составляет поиск принципов поведения робота на основе взаимодействия между роботом и окружающей средой.	составлять
их простые фамилии	familija	фамилия	3	0	OV	Каждый день помирают Петровы и Ивановы, их простые фамилии высекают на мраморе.	высекать
советы, как пройти,	sovet	совет	3	0	OV	Вдруг трое - мужчина, женщина, старик, только что спокойно с ним разговаривавшие, - кто что-то объясняет, кто советы дает, как пройти, - увидели хлеб и как-то дернулись, словно бы бросились мгновенно и тут же сдержались.	давать
свой кровный рубль	rubl'	рубль	3	0	OV	Ведь чуть какая-нибудь художественная выставка, Мону Лизу привезут или там Глазунова, они же по пять часов давятся в очередищах и еще свой кровный рубль платят.	платить
такую большую любовь	ljubov'	любовь	3	0	OV	Я как-то у него спросил: Борис Александрович, а что это вы ко мне такую большую любовь проявляете?	проявлять
часть пакета Газпромбанка	chast'	часть	3	2	OV	Крупнейшими акционерами новой компании станут РАО ЕЭС России и Газпромбанк - они получат по 25 % (возможно, часть пакета Газпромбанка приобретет сам "Газпром").	приобрести
большее количество регионов	kolichestvo	количество	3	1	OV	Чем большее количество регионов соблазнит РКС, тем проще будет управляться с "коммуналкой", поскольку работать нужно будет не с десятками безответственных наздратенок, а с одним ответственным Абызовым.	соблазнить
поставленные боевые задачи	zadacha	задача	3	1	OV	Мировой опыт показывает, что профессионалы обходятся государству дешевле резервистов, поскольку поставленные боевые задачи они выполняют гораздо эффективнее.	выполнять
мальчиков и девочек	mal'chik	мальчик	3	2	OV	Сегодня мальчиков и девочек готовят к одинаковой деятельности - ведь гендерное разделение труда не такое жесткое, как раньше, а в образовании женщины опережают мужчин, и это медленно подготавливает иной стереотип мышления.	готовить
центральный аппарат Лубянки	apparat	аппарат	3	1	OV	Аппарат НАК будет сформирован из сотрудников ФСБ и в рамках ее же структуры, потому центральный аппарат Лубянки расширят еще на 300 штатных единиц.	расширить
дома с террористами	dom	дом	3	2	OV	А потом мы удивляемся, с чего бы это вдруг дома с террористами штурмуют ОМОНы, СОБРы и прочие милицейские формирования, в задачи которых борьба с террористами не входит даже формально!	штурмовать
повороты к свободе	povorot	поворот	3	2	OV	На Западе повороты к свободе называют прогрессом.	называть
Мирную смену власти	smena	смена	3	3	OV	Мирную смену власти он справедливо поставит себе в заслугу: при Сталине о таком никто бы и помыслить не смел.	ставить
все ключевые позиции	pozitsija	позиция	3	0	OV	Но тогда все ключевые позиции захватят иностранные компании, которые создают у нас филиалы, центры, где будут работать наши ученые и специалисты.	захватить
Недовольство базарного люда	nedovol'stvo	недовольство	3	3	OV	Недовольство базарного люда по-своему разделяет и серьезный бизнес.	разделять
потаенный сигнал Магомедова	signal	сигнал	3	1	OV	И будто бы потаенный сигнал Магомедова озвучивает Сурков в своей известной речи перед крупным бизнесом: дай дагестанцам самим выбирать себе руководителя, так ведь они того и гляди себе выберут какого-нибудь ваххабита.	озвучивать
То же самое	to	то	3	5	OV	То же самое на разные лады повторяют наши законодатели - сенаторы и депутаты нижней палаты.	повторять
Современные турнирные мишени	mishen'	мишень	3	0	OV	Современные турнирные мишени делают вовсе не из дерева, а из натуральных волокон, например сизаля.	делать
такие основы научные	osnova	основа	3	0	OV	Но ведь мы такие основы закладываем научные, так логическое мышление развиваем, на кружках-олимпиадах нестандартные задачи целыми классами решаем!	закладывать
аналог этого сплава	analog	аналог	3	3	OV	За рубежом аналог этого сплава обычно называют "авиационный алюминий 6061".	называть
Самые маленькие паровозы	parovoz	паровоз	3	0	OV	Самые маленькие паровозы делает английская компания Hornby - в так называемом масштабе HO (1:87) с шириной колеи 16 мм.	делать
Этот последний тезис	tezis	тезис	3	0	OV	Этот последний тезис иллюстрирует цифра - на конец 1936 г., когда начальная волна политических репрессий схлынула, многие противники режима эмигрировали, и он очевидным образом консолидировался, численность узников концлагерей составляла 4761 человек (включая алкоголиков, наркоманов и профессиональных преступников) на 60 с лишним миллионов человек населения.	иллюстрировать
упреки такого рода	uprek	упрек	3	3	OV	Впрочем, упреки такого рода Али отводит, заявляя: "Моя книга не претендует быть всеобъемлющим объяснением национал-социалистического периода истории".	отводить
Объем 1,8 л	ob'em	объем	3	2	OV	Объем 1,8 л берут все спортсмены, а вот на следующем этапе - 1,9 л - сдают сразу двое: это немец с русскими корнями Bork и чистюля-швед Electrolux.	брать
подобного рода ответы	otvet	ответ	3	1	OV	Из этой бумаги следует не только то, что 27 апреля 2005 года Мурад Мурадов был еще жив - подобного рода ответы нередко получают родственники "исчезнувших" людей: "Забрали, но выпустили, где он теперь - не знаем".	получать
Формы для литья	forma	форма	3	2	OV	Формы для литья делают из гипса или виксинта - силиконовой резины химической полимеризации.	делать
Металлические части оружия	chast'	часть	3	2	OV	Металлические части оружия вначале красят полностью в черный цвет или каким-либо из темных "металликов" (и такие краски для моделистов выпускают).	красить
именно вертикальные колебания	kolebanie	колебание	3	1	OV	Прибор рекомендуется устанавливать вертикально, так как именно вертикальные колебания человек воспринимает наиболее остро.	воспринимать
Большую часть пути	chast'	часть	3	1	OV	Большую часть пути проедем накатом, а едва впереди покажется станция, начнем тормозить, ведь длина тормозного пути со скорости 90 км/ч лишь немногим менее 300 м даже при экстренном торможении.	проездить
почти весь бой	boj	бой	3	1	OV	Причем у быка есть фора: почти весь бой тореадор проводит с мягкой декоративной шпажкой и лишь за две-три минуты до финала меняет ее на стальную.	проводить
Основную волну жалоб	volna	волна	3	6	OV	Основную волну жалоб на " Прямой линии " ожидают после 15 апреля.	ожидать
большую часть времени	chast'	часть	3	1	OV	"Это приводит к тому, что организации вместо того, чтобы заниматься уставной деятельностью, большую часть времени тратят на отчетность", - считает он.	тратить
Некоторые транспортные проблемы	problema	проблема	3	0	OV	Некоторые транспортные проблемы вызовет не только сам парад, но и его генеральная репетиция.	вызвать
Эту точку зрения	tochka	точка	3	1	OV	Эту точку зрения разделяет большая часть статистических ведомств по всему миру.	разделять
какие проблемы, препятствия	problema	проблема	3	3	OV	Вот так выглядит наш проект непрерывной практики на бумаге, без учета того, какие проблемы, препятствия он встретит в реальной жизни в процессе пятилетней реализации.	встретить
обязательства и ограничения	objazatel'stvo	обязательство	3	2	OV	Но Россия не стала членом ВТО в обещанные ей сроки, а обязательства и ограничения несет, и это никуда не годится.	нести
телефон Chocolate VX8550	telefon	телефон	3	3	OV	Однако телефон Chocolate VX8550 вы невзлюбите буквально с первой минуты.	невзлюбить
компанию " КИТ Финансу "	kompanija	компания	3	4	OV	Эксперты не исключают, что компанию "КИТ Финансу" составят еще несколько банков, в том числе и крупные.	составить
возможность его удовлетворить	vozmozhnost'	возможность	3	2	OV	Но возможность его удовлетворить дают только самым лучшим.	давать
Все большую популярность	populjarnost'	популярность	3	0	OV	Все большую популярность набирает Санкт-Петербург, где, по данным исследовательского холдинга Romir Monitoring, в 2006 году хотел бы жить каждый 20-й москвич.	набирать
такие же действия	dejstvie	действие	3	0	OV	С промежутками в четыре секунды такие же действия выполняют следующие два ряда, и затем через такое же время еще один.	выполнять
ставку на который	stavka	ставка	3	2	OV	Малый и средний бизнес, ставку на который делает экономика большинства развитых стран, в России развивается ни шатко ни валко.	делать
Систему высшего образования	sistema	система	3	2	OV	Систему высшего образования представят университеты, академии и институты.	представить
Особенно большие трудности	trudnost'	трудность	3	2	OV	Особенно большие трудности повышение тарифов принесет малому и среднему бизнесу, которые и так находятся в очень сложном положении.	принести
базовую часть пенсий	chast'	часть	3	1	OV	С 1 августа базовую часть пенсий повысят еще на 15%.	повысить
опасность для России	opasnost'	опасность	3	2	OV	Между тем опасность для России представляют не колебания нефтяных цен, а вероятность быстрого оттока капитала.	представлять
Джунгли российского капитализма	dzhungli	джунгли	3	2	OV	Джунгли российского капитализма прочесывает уже не первый год и отмечает: настоящие профессиональные зубры в последнее время - редкая добыча.	прочесывать
Большую часть времени	chast'	часть	3	2	OV	Большую часть времени ученики проводят на производстве.	проводить
Не меньшее значение	znachenie	значение	3	0	OV	Не меньшее значение имеют образование и работа.	иметь
То же самое	to	то	3	5	OV	То же самое мы с вами видим в Москве и других крупных городах в самых разных отраслях.	видеть
Всю молочную продукцию	produktsija	продукция	3	1	OV	Всю молочную продукцию Китай импортирует.	импортировать
Каспарова и Карпова	Kasparov	Каспаров	3	5	OV	Каспарова и Карпова финансовая сторона не волнует.	волновать
взгляды друг друга	vzgljad	взгляд	3	3	OV	Испанский король Хуан Карлос и венесуэльский лидер Уго Чавес используют один и тот же языковой код, принадлежат к одной религии и имеют общую имперскую историю, но взгляды друг друга не принимают.	принимать
персоналистскую политическую традицию	traditsija	традиция	3	0	OV	Чаще всего персоналистскую политическую традицию объясняют с позиций цивилизационных доктрин инерцией сознания.	объяснять
Все дно " саркофага "	dno	дно	3	3	OV	Все дно "саркофага" занимает трехспальный диван-кровать.	занимать
попавшего сюда человека	chelovek	человек	3	2	OV	НЭК, борт ТМК - зона сверхконтроля, и попавшего сюда человека как будто накрывает множеством координатных сеток.	накрывать
рефераты и дипломы	referat	реферат	3	3	OV	Потенциальному работодателю требовались скорость плюс "спортивное ориентирование" в Интернете - рефераты и дипломы фирма печет как пирожки.	печь
" Флаг в руки "	flag	флаг	3	7	OV	"Флаг в руки" обманщикам, кстати, дает законодательство, которое не запрещает размещение на web-странице публичных предложений о заключении договора в электронном виде.	давать
немалую долю пирога	dolja	доля	3	1	OV	К тому же выйти на этот рынок сейчас непросто, и немалую долю пирога откусывают "писатели"-одиночки.	откусывать
Свои олимпийские игры	igra	игра	3	1	OV	Свои олимпийские игры здесь проводят по тому же графику, что и основные олимпийские соревнования: зимние и летние чередуются каждые два года.	проводить
Идею министерского нововведения	ideja	идея	3	3	OV	Идею министерского нововведения не понимают до конца даже директора школ.	понимать
ту же энергию	energija	энергия	3	0	OV	Ну а в России ту же энергию тратят - по традиции - в подковерных шоу, для более узкого круга зрителей-соучастников.	тратить
программы двадцатилетней давности	programma	программа	3	5	OV	Но и спрашивают с профессоров гораздо строже - программы двадцатилетней давности им уже не продашь.	продать
существенную часть доходов	chast'	часть	3	2	OV	Выиграть от европейского долгового кризиса смогут не только российские туристы, но и отечественный Минфин, ведь существенную часть доходов бюджет получает от нефтяных пошлин, которые взимаются в долларах.	получать
и свою жизнь	zhizn'	жизнь	3	0	OV	Не будет ошибкой сказать, что Апраушев и свою жизнь строит по этому принципу.	строить
должность помощника академику	dolzhnost'	должность	3	0	OV	Как было записано в академическом Уставе 1747 года, "всяк академик иметь должен при себе адъюнкта, который должность имеет помощника академику, а притом стараться должен как академик об адъюнкте, так и адъюнкт сам о себе, чтобы ему со временем заступить академика своего, по отбытии его, место".	иметь
Совершенно очищенные листы	list	лист	3	0	OV	Совершенно очищенные листы погружают на час времени в расплавленное сало; потом на 11/2 часа в расплавленное (не совершенно чистое) олово.	погружать
Каждый конец ленты	konets	конец	3	1	OV	Каждый конец ленты тянут три или четыре человека.	тянуть
Максимальное количество очков	kolichestvo	количество	3	2	OV	Максимальное количество очков маневр получает, если он совершен идеально; иначе очки вычитаются.	получать
мировоззрение этих коллег	mirovozzrenie	мировоззрение	3	3	OV	Она вполне может не мешать изучению каких-то иных явлений (никто из биологов, кажется, и не занимается проблемами генетики Иисуса Христа), но мировоззрение этих коллег мы считаем не вполне научным.	считать
Ходы без взятия	hod	ход	3	3	OV	Ходы без взятия пешка делает по вертикали на одно поле вперед.	делать
никакую динамику его	dinamika	динамика	3	6	OV	Кое-что, конечно, можно увидеть здесь, но если у вас есть событие, которое протекает, скажем, 10 наносекунд, то, конечно, никакую динамику его вы с помощью видеокамеры не увидите.	видеть
самые лучшие предсказания	predskazanie	предсказание	3	0	OV	Что это за кривые - не сильно важно, просто видно, что разные теоретические подходы к описанию отклика этой молекулы, скажем, с учетом переноса электронов или протонов или того и другого вместе дают немножко разные предсказания, и самые лучшие предсказания дает кривая, которая учитывает, скажем, перенос и электронов и протонов.	давать
низкий результат начальника	rezul'tat	результат	3	2	OV	Потому что каждый губернатор будет считать, что низкий результат начальника начальник поставит в вину не самому себе, а губернатору.	ставить
последствия этой системы	posledstvie	последствие	3	3	OV	Она существовала как бы сама для себя, и последствия этой системы мы переживаем до сих пор.	переживать
очень большую роль	rol'	роль	3	0	OV	При этом очень большую роль играет соображение "справедливости": разве человек не заслужил?	играть
Электорат этой партии	elektorat	электорат	3	6	OV	Электорат этой партии в основной своей массе составляют бюджетники, то есть те, чьё существование напрямую зависит от государства.	составлять
основные направления политики	napravlenie	направление	3	1	OV	Если основные направления политики определяет президент, то соперничество партий на парламентских выборах, пусть и честных, может быть лишь конкуренцией в борьбе за думские кресла и привилегии, а не за возможность проводить в жизнь свои программы.	определять
единый учебник истории	uchebnik	учебник	3	1	OV	Если единый учебник истории напишут даже "двадцать лучших историков" (тут-то мы и узнаем их имена), очевидно, что альтернативные подходы в него не попадут, а значит, останутся источником общественного конфликта.	писать
Даже собственное правительство	pravitel'stvo	правительство	3	1	OV	Даже собственное правительство россияне воспринимают как враждебную им силу.	воспринимать
и саму педагогику	pedagogika	педагогика	3	1	OV	Кстати, и саму педагогику вальдорфцы считают не наукой, а скорее искусством - искусством воспитания.	считать
дело падуанского доктора	delo	дело	3	2	OV	В наши дни дело падуанского доктора продолжает целое интернет-сообщество "Измерь себя".	продолжать
представителей теории модернизации	predstavitel'	представитель	3	2	OV	Некоторые люди порой путают модернизацию и вестернизацию, причем представителей теории модернизации обвиняют в том, что они не признают национальных отличий и всех стригут под одну гребенку.	обвинять
Главную задачу хозяйственную	zadacha	задача	3	2	OV	Главную задачу они себе ставят хозяйственную.	ставить
оттенки политических цветов	ottenok	оттенок	3	2	OV	Но, кажется, на этих конкретных выборах оттенки политических цветов различает только он, преданный член КПРФ.	различать
все большую силу	sila	сила	3	0	OV	Сейчас все большую силу набирает так называемая теория многоуровневого отбора.	набирать
Такого рода концепции	kontseptsija	концепция	3	0	OV	Такого рода концепции называют "идиллическим социализмом".	называть
чью многолетнюю работу	rabota	работа	3	1	OV	Да и как еще могут относиться к министру люди, чью многолетнюю работу он величает "профанацией", а затем напутствует: "Пусть работают, главное, чтобы работали, а не балду гоняли".	величать
какое важное значение	znachenie	значение	3	1	OV	В отличие от большинства других генов человека, когда его удалось обнаружить, было уже совершенно ясно, какое важное значение он имеет для эволюции человека.	иметь
даже реальную информацию	informatsija	информация	3	1	OV	Он даже реальную информацию не получает о том, что реально происходит, какова реальная ситуация.	получать
Осаму бен Ладена	Osama	Осама	3	2	OV	Осаму бен Ладена убьют свои.	убить
Особую обеспокоенность властей	obespokoennost'	обеспокоенность	3	1	OV	Особую обеспокоенность властей вызывает также тот факт, что Рейд следовал без багажа и по билету, купленному в один конец.	вызывать
Такое развитие событие	razvitie	развитие	3	2	OV	Такое развитие событие не исключают источники в штаб-квартире ОПЕК в Вене.	исключать
вину за произошедшее	vina	вина	3	5	OV	Между тем, вину за произошедшее британская газета Times возлагает на правительство Индонезии - долгое время оно игнорировало предупреждения об угрозе терроризма.	возлагать
Несколько большую эффективность	effektivnost'	эффективность	3	0	OV	Несколько большую эффективность имеют мокрые аппараты (они орошаются водой, отсюда и название).	иметь
Львиную долю их	dolja	доля	3	1	OV	Львиную долю их составляют полупроводниковые - из германия, кремния, арсенида галлия, фосфорида галлия и другие.	составлять
Этот номер журнала	nomer	номер	3	2	OV	Этот номер журнала читатель получит накануне знаменательной даты - 25-летия первого полета в космос Ю. А. Гагарина.	получить
Наложение электрического поля	nalozhenie	наложение	3	3	OV	Наложение электрического поля ученые рассматривают как непременное условие ускорения переноса.	рассматривать
наибольший народнохозяйственный эффект	effekt	эффект	3	1	OV	- Я думаю, наибольший народнохозяйственный эффект она даст при извлечении ценных или токсичных компонентов из сточных вод либо разбавленных технологических растворов, например в гидрометаллургических производствах.	дать
Все эти вопросы	vopros	вопрос	3	1	OV	Все эти вопросы ежедневно ставит жизнь в нашей многонациональной семье.	ставить
То же самое	to	то	3	3	OV	То же самое Данилевский говорит и о самой влиятельной русской газете того времени - "Московских ведомостях".	говорить
всю эту схему	shema	схема	3	2	OV	А потом всю эту схему где мы увидим?	увидеть
Какой объем фонда	ob'em	объем	3	2	OV	Какой объем фонда агентство прогнозирует на конец 2014 года и в 2015 году?	прогнозировать
какой ее уровень	uroven'	уровень	3	1	OV	Какова сейчас достаточность фонда страхования вкладов и какой ее уровень агентство прогнозирует на следующий год?	прогнозировать
что и зачем	chto	что	3	3	OV	Это были живые, оптимистические молодые люди, ясно понимающие и умеющие объяснить, что и зачем они делают, представляющие, что им предстоит, не строящие иллюзий, но и не желающие отступать.	делать
сегодняшнюю жизнь нефтяников	zhizn'	жизнь	3	1	OV	На экране, обернувшись с переднего сиденья машины, сегодняшнюю жизнь нефтяников обсуждает с Гердом, стоящим на сцене, его коллега, тоже немец, сейчас работающий в Казахстане.	обсуждать
всё равно бокалы	bokal	бокал	3	0	OV	Уже лет семь я занимаюсь бытовой семантикой и всё равно бокалы называю рюмками.	называть
Интегральное описание языка	opisanie	описание	3	2	OV	Юрий Апресян: "Интегральное описание языка я считаю сверхзадачей синхронической лингвистики".	считать
Дорогу к ней	doroga	дорога	3	4	OV	Дорогу к ней будущий президент прокладывает на дипломатическом поприще.	прокладывать
планку болевого порога	planka	планка	3	4	OV	И в масштабах страны даже такая расправа над журналистом планку болевого порога вряд ли поднимет.	поднять
каждый из которых	kazhdyj	каждый	3	6	OV	Информация стекается в вычислительный центр, где в реальном времени отслеживается порядка 15 тысяч космических объектов, каждый из которых служащие здесь военные буквально знают в лицо.	знать
руководителей американского телевидения	rukovoditel'	руководитель	3	2	OV	Наш истеблишмент, скажем, верит, что руководителей американского телевидения вызывают в Белый дом, чтобы дать указание, кого и как показывать.	вызывать
Этих добрых людей	chelovek	человек	3	2	OV	- Этих добрых людей я не знаю, - ответил арестант.	знать
всех, что ли,	vse	все	3	5	OV	Ты всех, что ли, так называешь?	называть
главное блюдо, ковбойское,	bljudo	блюдо	3	3	OV	Но главное блюдо, ковбойское, готовят сам Ричард с сыновьями.	готовить
Такое положение вещей	polozhenie	положение	3	2	OV	Такое положение вещей мормоны считают залогом материального и духовного благополучия своей общины.	считать
часть этих мер	chast'	часть	3	2	OV	Я считаю, что правительство в ходе дискуссии часть этих мер доберет в сопутствующий пакет к законодательству о повышении пенсионного возраста или примет эти меры для реализации "майского указа" президента.	добрать
то же самое	to	то	3	2	OV	Сейчас то же самое пишут в отношении пенсий.	писать
тылы эстетической власти	tyl	тыл	3	2	OV	Чуть дальше тылы эстетической власти прикрывают все-таки более надежные Музей науки и Империал-колледж Лондонского университета.	прикрывать
Вот все это	eto	это	3	3	OV	Вот все это Линней Трайп и снимает.	снимать
свои минимальные полномочия	polnomochie	полномочие	3	1	OV	Я вижу систему изнутри, я свои минимальные полномочия эффективно использую.	использовать
Никиту Сергеевича Хрущева	Nikita	Никита	3	2	OV	В октябре того же года на таком же пленуме ЦК КПСС Никиту Сергеевича Хрущева сместят со всех постов и отстранят от власти.	сместить
Кого из феминисток	kto	кто	3	3	OV	Кого из феминисток это смущает?	смущать
Многих радикальных феминисток	feministka	феминистка	3	1	OV	Многих радикальных феминисток не смущает, например, количество проституток, эскортниц.	смущать
костяк радикальных феминисток	kostjak	костяк	3	5	OV	Но, главное, костяк радикальных феминисток, безусловно, составляют идейные личности, главная цель которых стереть любые различия, нарушить сами основы бытия.	составлять
хоть домашние задания	zadanie	задание	3	0	OV	#NAME?	делать
Первую часть фразы	chast'	часть	3	1	OV	Первую часть фразы произносит гражданка - думаю, это понятно даже ежу-мужчине и ежу-женщине - не примите это на свой счет.	произносить
Вторую часть фразы	chast'	часть	3	1	OV	Вторую часть фразы произносит поэтка.	произносить
рыбу из Тигра	ryba	рыба	3	6	OV	#NAME?	найти
Все большее развитие	razvitie	развитие	3	0	OV	Все большее развитие получает компьютерное онлайн образование и медицинская онлайн диагностика, но представить себе востребованность робота-акушера пока сложнее.	получать
не все изотопы	izotop	изотоп	3	2	OV	Часто биохимиков также интересует изотопное соотношение (живые организмы не все изотопы одинаково хорошо встраивают в свои клетки) и хиральность молекул - мало-мальски сложная органика бывает "левой" и "правой", подобно перчаткам.	встраивать
это мутное слово	slovo	слово	3	1	OV	Тут можно было бы употребить слово "талант", но поскольку это мутное слово каждый толкует по-своему, лучше его не трогать.	толковать
День окончания эпидемии	den'	день	3	3	OV	День окончания эпидемии страна встречает салютом изо всех обычных видов вооружения.	встречать
всех без исключения	vse	все	3	2	OV	Думаю, всех без исключения интересует личность собственного начальника.	интересовать
Попытки таких прогнозов	popytka	попытка	3	2	OV	Попытки таких прогнозов предпринимают многие ученые разных стран, и мы, разумеется, это делаем.	предпринимать
этот подземный лабиринт,	labirint	лабиринт	3	8	OV	Сейчас этот подземный лабиринт, несмотря на славное прошлое, местные жители используют в качестве укромного места для малых и больших нужд.	использовать
туристов с фотоаппаратами	turist	турист	3	4	OV	Они уверены, что туристов с фотоаппаратами к ним загоняют специально для развлечения.	загонять
работниц общественных туалетов	rabotnitsa	работница	3	2	OV	Подобные истории случались со мной в Германии, в Англии и даже во Франции, где работниц общественных туалетов называют "мадам Пипи".	называть
заявление профессора Щеглова	zajavlenie	заявление	3	3	OV	Если заявление профессора Щеглова я понимаю правильно, он способен оказать помощь любому, кого замучили мечты о небоскребах.	понимать
Все эти прелести	prelest'	прелесть	3	0	OV	Все эти прелести обнаруживают активисты Объединенного народного фронта (ОНФ) и темпераментно выкладывают президенту Путину на очередной встрече.	обнаруживать
Демографическую ситуацию " окна "	situatsija	ситуация	3	3	OV	Демографическую ситуацию "окна" называют медианной: это когда примерно половина населения старше, а половина - младше определенного возраста.	называть
ветчину и рыбу	vetchina	ветчина	3	2	OV	говорил философ Кант: я хотя не музыкант но однако понимаю звуков чудную игру часто мысли вынимаю и гуляю на пиру суп наперченный вкушаю ветчину и рыбу ем	есть
Платья желтой парчи	plat'e	платье	3	2	OV	* * * Солнце льет жаркий мед в степи и луга, Платья желтой парчи дарит всем подряд.	дарить
чистый кофейный настой	nastoj	настой	3	0	OV	Через 15—20 минут кофе процеживают и чистый кофейный настой вливают вместе с коньяком в сахарный сироп, который тщательно размешивают и охлаждают.	вливать
половину голосов уже	polovina	половина	3	4	OV	Да и не проголосует там 2/3, они половину голосов уже с трудом набирают, там единороссы раскололись.	набирать
наших героев народа	geroj	герой	3	5	OV	Друзья, а вы заметили , что-то наших героев народа наши власти как_-то не жалуют.	жаловать
щеку без кpаcки	scheka	щека	3	3	OV	Я знаю -- медленно, но веpно ко мне уже подxодит та, котоpую в cтаpинной cказке пpивыкли pиcовать c коcой, котоpая щеку без кpаcки поcледней обдает pоcой.	обдавать
Словесность русскую, язык	slovesnost'	словесность	3	3	OV	Блаженствуй, но в часы свободы, вдохновенья Беседуй с музами, пиши стихотворенья, Словесность русскую, язык обогащай И вечно с миртами ты лавры съединяй.	обогащать
И краски ясней	kraska	краска	3	0	OV	Пройдет мгновенное ненастье, Чтоб нам явить светлее день, Когда дойдет до жданной меты, Как резкая в картине тень Бросает живость на предметы И краски выдает ясней.	выдавать
Хоть каплю радости	kaplja	капля	3	1	OV	На милу родину пошлю, Тем усладив разлуку нашу, И в вашу горестную чашу Хоть каплю радости волью.	влить
Будущих участников сопротивления	uchastnik	участник	3	1	OV	Будущих участников сопротивления призывают нападать на сторонников режима, депутатов парламента и сотрудников правоохранительных органов.	призывать
вторую встречу подряд	vstrecha	встреча	3	1	OV	Дэвенпорт вторую встречу подряд проводит в схожей манере: она подавляет соперницу в первом сете, а во втором не форсирует события, не тратит силы, но доводит дело до победы.	проводить
только горячий чай	chaj	чай	3	0	OV	Подруга попробовала фен в клубе и ей плохо как 4дня не чего не может есть все обратно только горячий чай пет она в сём дело и что ей поесть надо	пить
большую часть дня	chast'	часть	3	3	OV	И он может думать, что ест часто и даже много, но по сути большую часть дня его организм голодает.	голодать
большую группу товаров	gruppa	группа	3	1	OV	Широкий ассортимент,большую группу товаров предоставляют в кредит,действует система скидок ,начисляются баллы...	предоставлять
соответствие цена / качество	sootvetstvie	соответствие	3	4	OV	Был на корпоративе, поэтому соответствие цена/качество не оценю.	оценить
всякое разное шмотье	shmot'e	шмотье	3	0	OV	Я просто видел оптовиков, которые всякое разное шмотье продают за копейки, а потом завозят в магазины и ставят конские ценники.	продавать
года выпуска их	god	год	3	3	OV	И я ещё раз вам повторяю, они бывают Совершенно не одинаковые, причём прям реально, они Совершенно Разные бывают, но года выпуска я их знаю очень хорошо.	знать
Какие фирмы кит-комплектов	firma	фирма	3	1	OV	Какие фирмы кит-комплектов посоветуете?	посоветовать
пирожки с рук	pirozhok	пирожок	3	2	OV	Кто сейчас пирожки с рук покупает, - Вера даже не оторвалась от телефона.	покупать
Только вот что	chto	что	3	1	OV	Только вот что я скажу?	сказать
обильные и довольные земли	zemlja	земля	4	0	OV	Причём ремесленники тот час в цехах примутся, а землепашцы обильные и довольные земли получат.	получить
Полный оборот вокруг звезды	oborot	оборот	4	3	OV	Полный оборот вокруг звезды она совершает за почти девять земных суток.	совершать
Альпинистскую подготовку горнострелковых частей	podgotovka	подготовка	4	2	OV	Альпинистскую подготовку горнострелковых частей осуществляют опытные горовосходители, обучая солдат и офицеров методам преодоления сложного горного рельефа, технике альпинизма и способам обеспечения безопасности.	осуществлять
человека на VIP - трибуне	chelovek	человек	4	4	OV	Ибо человека на VIP-трибуне зовут Роман Абрамович, и весь мир знает его в лицо.	звать
Наибольшую часть потенциальной киноаудитории	chast'	часть	4	2	OV	Наибольшую часть потенциальной киноаудитории составляют молодые люди.	составлять
Взбудораженное общественное мнение Башкирии	mnenie	мнение	4	1	OV	Взбудораженное общественное мнение Башкирии интересуют другие вопросы: как это могло случиться, кому это было надо и кто за это должен понести ответственность?	интересовать
также очень большую роль	rol'	роль	4	0	OV	Но на Западе также очень большую роль играют наукометрические показатели, в частности импакт-фактор (ИФ) журналов, в которых публикуются ученые.	играть
Шины для сухой трассы	shina	шина	4	3	OV	Шины для сухой трассы различают по твердости: "суперсофт" (наиболее мягкие), "софт", "медиум" и "хард" (наиболее твердые).	различать
К людям врожденную любовь	ljubov'	любовь	4	1	OV	К людям врожденную любовь слон испытывает, особенно к красивым женщинам, но еще большую - к маленьким детям".	испытывать
все наши внутренние расчеты	raschet	расчет	4	5	OV	Вот как объяснил "Итогам" данную логику владелец мебельных салонов "Гранд" и "Три кита" Сергей Зуев: "Цены на мебель в наших салонах установлены в рублях - так положено по российскому законодательству, но все наши внутренние расчеты мы вот уже полгода ведем исключительно в евро.	вести
однако порождает тот же	vopros	вопрос	4	0	OV	Нынешний слух о памятнике Андропову остался безымянным (одни СМИ приписывали инициативу самому Путину, другие - каким-то неназванным депутатам), однако вопрос порождает тот же самый: зачем?	порождать
и нефть, и газ	neft'	нефть	4	4	OV	Украина растет с 1999 г. чуть более высокими темпами, чем Россия, хотя и нефть, и газ она покупает, а не продает, да к тому же уже пятый год как не выберется из череды политических катаклизмов.	покупать
Ближайший к распилу торец	torets	торец	4	0	OV	Ближайший к распилу торец подпирают, чтобы ствол не смог отклониться вбок.	подпирать
не двигатели для них	dvigatel'	двигатель	4	2	OV	Я же не двигатели для них делаю".	делать
финансово - экономический блок правительства	blok	блок	4	2	OV	В последние годы финансово-экономический блок правительства много критикуют за то, что они возвели бюджетную стабильность в культ и забывают заниматься развитием экономики.	критиковать
Говно, чего же еще	govno	говно	4	0	OV	- Говно сдают, чего же еще!	сдавать
предназначение и длину которых	prednaznachenie	предназначение	4	7	OV	А еще, говорят, здесь в глубину уходят таинственные тоннели, предназначение и длину которых по сей день не знает никто.	знать
какие преимущества и недостатки	preimuschestvo	преимущество	4	7	OV	Мы лишь говорили о том, какие преимущества и недостатки в краткосрочной и долгосрочной перспективе имеют разные варианты политики валютного курса.	иметь
это, увековечивать, нет _	eto	это	4	0	OV	Вот он женится на Лоре и помрет - она же не решится обратиться туда, где это решают, увековечивать, нет ли…	решать
Наименьший рост и массу	rost	рост	4	2	OV	Наименьший рост и массу имеют жители экваториальных областей.	иметь
любовь к стабилизационному фонду	ljubov'	любовь	4	3	OV	Более того, любовь к стабилизационному фонду разделяет и Центробанк.	разделять
то, что делает правительство,	to	то	4	5	OV	- Сергей Юрьевич, судя по вашим последним выступлениям, высказанные в президентском Послании экономические инициативы вы поддерживаете, а то, что делает правительство, критикуете.	критиковать
Угнетенность в социальной жизни	ugnetennost'	угнетенность	4	4	OV	Угнетенность в социальной жизни мужчины компенсируют домашней тиранией.	компенсировать
Какие работы последних лет	rabota	работа	4	3	OV	Какие работы последних лет вы считаете самыми главными, имеющими принципиальное значение?	считать
Движение по территории России	dvizhenie	движение	4	5	OV	Движение по территории России лунная тень начнет в горах Кавказа.	начать
одно колесо из партии	koleso	колесо	4	3	OV	А одно колесо из партии безжалостно распиливают, вырезая из него специальный фрагмент - так называемый шаблон.	распиливать
основную часть стоимости меча	chast'	часть	4	4	OV	Правда, основную часть стоимости меча все равно составляет именно клинок.	составлять
Средства осуществления этого курса	sredstvo	средство	4	3	OV	Средства осуществления этого курса вскрывают ключевые цифры, резюмирующие сложные и трудоемкие подсчеты, произведенные автором: по меньшей мере две трети реальных немецких доходов во время войны проистекали из иностранных (оккупированные и вассальные страны) и "расово-чуждых" (евреи, иностранные принудрабочие) источников; оставшаяся треть делилась между социальными слоями немецкого общества крайн…	вскрывать
Убытки от замораживания цен	ubytok	убыток	4	3	OV	Убытки от замораживания цен подсчитывают и производители.	подсчитывать
потребность страны в адвокатах	potrebnost'	потребность	4	3	OV	Так вот, там потребность страны в адвокатах определяет государство и раз в год проводит открытый экзамен.	определять
Ответы на эти вопросы	otvet	ответ	4	4	OV	Ответы на эти вопросы мы получим уже в самом ближайшем будущем.	получить
право на подготовку бакалавров	pravo	право	4	6	OV	Достижение столь высокого показателя станет реальным в том случае, если право на подготовку бакалавров наряду с вузами получат техникумы (3 года обучения после 11 класса).	получить
Проблему дефицита квалифицированных работников	problema	проблема	4	3	OV	Проблему дефицита квалифицированных работников ощущают и осознают на всех уровнях.	ощущать
Хотя бы одно основание	osnovanie	основание	4	0	OV	Хотя бы одно основание назову: по-моему, эпоха революций и войн в Европе (а значит, в России тоже) кончилась.	назвать
Все сборы и зарплаты	sbor	сбор	4	3	OV	Все сборы и зарплаты федерациям оплачивает Министерство спорта - и прямого доступа к этим деньгам нет.	оплачивать
периодические и неизматывающие нагрузки	nagruzka	нагрузка	4	1	OV	Специалисты пояснили, что периодические и неизматывающие нагрузки организм переносит нормально, так как успевают восстанавливаться запасы энергии.	переносить
какую роль в них	rol'	роль	4	2	OV	О том, какие импульсы к переменам проявляются сегодня и какую роль в них играют этнические факторы, я планирую в скором времени рассказать.	играть
Плату за риск немалую	plata	плата	4	3	OV	Плату за риск мне предлагают немалую: "Не меньше двух-трех "штук" будешь получать!"	предлагать
лыжника и биатлониста Зарипова	lyzhnik	лыжник	4	3	OV	Теперь лыжника и биатлониста Зарипова знает вся страна.	знать
вообще почти все время	vremja	время	4	0	OV	Фигуристка Юко Кавагути, выступающая в паре с Александром Смирновым, теперь вообще почти все время проводит в номере.	проводить
Абсурдность псевдонаучных претензий Петрика	absurdnost'	абсурдность	4	3	OV	Абсурдность псевдонаучных претензий Петрика демонстрируют его заявления, которые он распространяет через российские СМИ.	демонстрировать
многие составляющие этого учения	sostavljajuschaja	составляющая	4	5	OV	При этом он приводит немало фактов об истории православия и о нынешней позиции РПЦ, из-за которых нам с нашими представлениями о добре и зле очень сложно примириться с этой организацией и с ее учением, несмотря на то, что многие составляющие этого учения мы с энтузиазмом разделяем.	разделять
Все, что ему нужно,	vse	все	4	6	OV	Все, что ему нужно, он записывает на бумажных листах формата А4 и, как только исполняет записанное, тут же их выбрасывает.	записывать
интерес наблюдателей и комментаторов	interes	интерес	4	3	OV	Из четырех уличных акций, состоявшихся в 20-градусный мороз, интерес наблюдателей и комментаторов вызывают антипутинское шествие по Большой Якиманке, завершившееся митингом на Болотной площади, и "антиоранжевый" митинг на Поклонной горе.	вызывать
не экскурсии по музею	ekskursija	экскурсия	4	2	OV	Газета - не самое подходящее место для проповедей, а Раиса Павловна Кучуганова не экскурсии по музею водит, а именно проповедует: через нее старообрядцы, не склонные открывать душу перед людьми "с ветра", доносят то, что очень похоже на завещание.	водить
Широко признаваемую систему идей	sistema	система	4	1	OV	Широко признаваемую систему идей называют теорией, а частное предположение, нуждающееся в подтверждении (частным экспериментом или серией), - гипотезой.	называть
Особое значение для них	znachenie	значение	4	2	OV	Особое значение для них имеет вскармливание детёнышей.	иметь
Эволюцию общественного образа жизни	evoljutsija	эволюция	4	4	OV	Эволюцию общественного образа жизни даже связывают с родительским поведением.	связывать
Тяжелые и сложные операции	operatsija	операция	4	2	OV	Тяжелые и сложные операции практически всегда проводят с двойной анестезией, что избавляет пациентов от возникновения изнуряющих фантомных болей.	проводить
средства для безбедной жизни	sredstva	средства	4	4	OV	Молчаливо подразумевалось, что средства для безбедной жизни чиновники доберут с просителей.	добрать
Большую активность " в сферах "	aktivnost'	активность	4	4	OV	Большую активность "в сферах" проявляет и председатель "культурной" комиссии Общественной палаты Павел Пожигайло.	проявлять
немаловажное место среди них	mesto	место	4	2	OV	И немаловажное место среди них занимает тромбоз глубоких вен ног - ведь человек в течение нескольких часов практически неподвижно сидит в кресле, что может примерно в 10 % случаев привести к нарушению венозного кровообращения, свертыванию крови и в конце концов тромбоэмболии легочной артерии и смерти.	занимать
Глав законодательных собраний регионов,	glava	глава	4	8	OV	Глав законодательных собраний регионов, по его словам, познакомят с работой нижней палаты, в частности, законопроектами, которые будут обсуждаться в ходе весенней сессии в Госдуме.	знакомить
эту историю с Сафроновым	istorija	история	4	4	OV	И вот теперь в письме, по форме - объяснительной записке на имя первого секретаря обкома, он сглаживал углы: вообще, мол, эту историю с Сафроновым я плохо знаю.	знать
Сотни миллионов тонн мазута	sotnja	сотня	4	3	OV	Сотни миллионов тонн мазута сжигают тепловые электростанции промышленно развитых стран.	сжигать
место корыстных ведомственных амбиций	mesto	место	4	3	OV	Более того, похоже, что место корыстных ведомственных амбиций занимает не свободная добротная научная экспертиза, а мифы обыденного сознания.	занимать
Огромный интерес к ней	interes	интерес	4	2	OV	Огромный интерес к ней проявляют самые различные круги за рубежом.	проявлять
уж не только голод	golod	голод	4	0	OV	Тут уж не только голод вспомнят.	вспомянуть
ограниченные возможности паромной переправы	vozmozhnost'	возможность	4	3	OV	Авиаперевозки, даже самые интенсивные, не в состоянии удовлетворить спрос, а ограниченные возможности паромной переправы не дают организовать поток туристов по суше.	давать
Сценарии относительно мелких столкновений	stsenarij	сценарий	4	5	OV	Сценарии относительно мелких столкновений я не беру во внимание, потому что никакая локальная война на границах снизить непосредственно уровень безопасности России не может.	брать
следы подобных предвоенных истерий	sled	след	4	4	OV	Впрочем, следы подобных предвоенных истерий мы находим задолго до нового времени даже в древности.	находить
роль и значение СМИ	rol'	роль	4	4	OV	Сегодня в России роль и значение СМИ часто преувеличивают.	преувеличивать
сюжеты, которые мы видим,	sjuzhet	сюжет	4	8	OV	- Есть такое, но знаете, сюжеты, которые мы видим, по темникам не распишешь, это уже сериал, это Голливуд со спецэффектами, только не с пиниями и цветами.	расписать
часть ( до 80 % )	chast'	часть	4	5	OV	В первом случае банк кредитует реального заемщика, который по договоренности часть денег использует в собственных целях, а часть (до 80%) направляет лицам, указанным банком.	направлять
Сохранение единого образовательного пространства	sohranenie	сохранение	4	4	OV	Сохранение единого образовательного пространства часто противопоставляют вариативности.	противопоставлять
какое колоссальное психологическое значение	znachenie	значение	4	0	OV	Бен-Гурион, который был и первым премьером, и министром обороны, прекрасно понимал, какое колоссальное психологическое значение имеет Иерусалим для всех евреев.	иметь
вот мэра Екатеринбурга Ройзмана	mer	мэр	4	7	OV	#NAME?	узнавать
Всякого, кого я коснусь,	vsjakij	всякий	4	6	OV	- Всякого, кого я коснусь, я возвращаю земле, из которой он вышел, - сказала она.	возвращать
Вот какую злую шутку	shutka	шутка	4	3	OV	Вот какую злую шутку я с тобой сыграю.	сыграть
Изысканную пенку из молока	penka	пенка	4	2	OV	Изысканную пенку из молока взбивает домашний ручной капучинатор.	взбивать
время, свое и мое	vremja	время	4	0	OV	А мужик и говорит ему: ты, говорит, только время теряешь, свое и мое, а если тебе справка нужна, то - видишь вон те гаражи?	терять
хоть Олега с Амиром	Oleg	Олег	4	2	OV	Не жалеешь себя, хоть Олега с Амиром пожалей.	пожалеть
Жаркова и Ресина хер	Zharkov	Жарков	4	3	OV	Жаркова и Ресина хер отмоешь	отмыть
своих детей и внуков	rebenok	ребенок	4	2	OV	Чем я отличаюсь от члена КПРФ, к примеру Он своих детей и внуков ведет на демонстрацию, а я своих - на службу в храм.	вести
что тебя или Лепса	chto	что	4	1	OV	Однажды ты спросишь, что я люблю больше: тебя или Лепса, ты уйдешь красиво, так и не узнав, что я тебя не люблю и это главный мой плюс.	любить
остроумие и вкус его	ostroumie	остроумие	4	3	OV	Ты остроумие и вкус его имеешь И нравиться во всем читателю умеешь.	иметь
счастье прочное, и радости	schast'e	счастье	4	4	OV	Прелестный взор ее тебя животворит И счастье прочное, и радости сулит.	сулить
и Питер и Петрозаводск	Piter	Питер	4	5	OV	Я тут, поверьте, и Питер и Петрозаводск для себя по-новому открываю!	открывать
И выбор, и цены	vybor	выбор	4	3	OV	И выбор, и цены устраивают.	устраивать
Горячий чай и кофе	chaj	чай	4	3	OV	Горячий чай и кофе всегда нальют	налить
Неплохой центр, чего нет,	tsentr	центр	4	4	OV	Неплохой центр, чего нет, привезут на заказ.	привезти
Одни магазины и пивнухи	magazin	магазин	4	3	OV	Одни магазины и пивнухи только открывают, всю страну пропили, человек человеку враг стал...	открывать
Вкуснее чем там, махито	mohito	мохито	4	2	OV	Вкуснее чем там, махито нигде не делают.	делать
штрафы по 1000 рублей	shtraf	штраф	4	3	OV	Если самого Шойгу выкинули из автобуса, а Путин правда штрафы по 1000 рублей платит.	платить
модель этого советского Колеса	model'	модель	4	5	OV	Но модель этого советского Колеса я не знаю вообще если честно.	знать
Какие художественно выразительные средства	sredstvo	средство	4	0	OV	Какие художественно выразительные средства использует Брюсов в своем стихотворении «Я (Мой дух не изнемог…)» ???НУЖНО ВЫПИСАТЬ НЕМНОГО	использовать
хотя бы проституток красивых	prostitutka	проститутка	4	1	OV	Типо, давай я тебе хотя бы проституток красивых вызову))	вызвать
Хирамацу Дзенки и Яцумото Эйти	Hiramatsu	Хирамацу	5	4	OV	Хирамацу Дзенки и Яцумото Эйти призывают в армию.	призывать
Должность окружного викария Стаклишкского деканата	dolzhnost'	должность	5	4	OV	Должность окружного викария Стаклишкского деканата занимает священник Йонас Далинявичюс ().	занимать
Основную часть населения ( 94 % )	chast'	часть	5	1	OV	Основную часть населения составляют калмыки (94 %).	составлять
Предварительную оценку категории сложности маршрута	otsenka	оценка	5	3	OV	Предварительную оценку категории сложности маршрута производят сами альпинисты - первопроходцы маршрутов восхождений.	производить
Право считаться осколком таинственной Атлантиды	pravo	право	5	6	OV	Право считаться осколком таинственной Атлантиды у Кубы оспаривают расположенные поблизости от нее Багамские острова.	оспаривать
ни первое, ни второе распоряжение	rasporjazhenie	распоряжение	5	3	OV	В ходу было выражение: "ждут третьего указа", то есть ни первое, ни второе распоряжение в толк не берут.	брать
Ценную информацию о жизни Галилея	informatsija	информация	5	3	OV	Ценную информацию о жизни Галилея содержит сохранившаяся переписка Галилея с его старшей дочерью Вирджинией, в монашестве принявшей имя Мария-Челеста.	содержать
Свои " недостаточно очищенные " сточные воды	voda	вода	5	4	OV	Свои "недостаточно очищенные" сточные воды он в большом количестве сбрасывает прямо в Азовское море.	сбрасывать
один и тот же блок	blok	блок	5	1	OV	- Судя по всему, - посмеялись мои собеседники, - там один и тот же блок сначала продают, потом сами же чиновники его сдают в лавочку и забирают свои деньги.	продавать
портрет обитателей " огня " и " сияния "	portret	портрет	5	8	OV	А портрет обитателей "огня" и "сияния" расценивают как изображение "космонавтов" в тяжелых скафандрах: "крылья", под которыми были руки, - винты какого-то устройства, управлявшегося астронавтами; а "молния" и "вид лампад" - иллюминаторы космического корабля.	расценивать
то, что дает раскоп, то	to	то	5	8	OV	Возможно, их было гораздо больше, чем каменных, но то, что дает раскоп, то он и дает.	давать
эту операцию, длившуюся шесть лет,	operatsija	операция	5	5	OV	Теперь в Центре им. Грабаря эту операцию, длившуюся шесть лет, вспоминают как самую рискованную за последние годы.	вспоминать
один кусок от этого бублика	kusok	кусок	5	4	OV	Тогда он берет один бублик, тот, где мака поменьше, разламывает на части и раздает, но один кусок от этого бублика все-таки берет себе, придерживает.	брать
Мону Лизу или там Глазунова	Mona	Мона	5	1	OV	Ведь чуть какая-нибудь художественная выставка, Мону Лизу привезут или там Глазунова, они же по пять часов давятся в очередищах и еще свой кровный рубль платят.	привезти
Не слишком ли мрачную картину	kartina	картина	5	1	OV	Не слишком ли мрачную картину вы рисуете?	рисовать
доступ к таким школам красоты	dostup	доступ	5	6	OV	Безусловно, доступ к таким школам красоты в России имеют очень небольшое количество людей.	иметь
Особый интерес для наших читателей	interes	интерес	5	3	OV	Особый интерес для наших читателей представляет не набор изменений, вносимых в отдельные статьи Бюджетного кодекса, а экономическое обоснование законопроекта, которое мы и приводим с сокращениями.	представлять
разум и уважение насчет покойников	razum	разум	5	4	OV	Зверье, оно разум и уважение насчет покойников имеет.	иметь
Большую часть " единороссов " - 7 человек -	chast'	часть	5	7	OV	Большую часть "единороссов" - 7 человек - представляют народные избранники Южного федерального округа.	представлять
Цвет " чернил " и толщину линий	tsvet	цвет	5	7	OV	Цвет "чернил" и толщину линий лектор выбирает по собственному усмотрению.	выбирать
материальную ответственность за эту деятельность	otvetstvennost'	ответственность	5	3	OV	Однако материальную ответственность за эту деятельность несут родители или опекуны.	нести
Получившуюся пористую стальную губку ( кера )	gubka	губка	5	3	OV	Получившуюся пористую стальную губку (кера) разбивают на блины.	разбивать
Коррумпирующий эффект посылочно - мешочной эпидемии	effekt	эффект	5	5	OV	Коррумпирующий эффект посылочно-мешочной эпидемии Али демонстрирует письмами домой солдата Генриха Белля.	демонстрировать
и такие краски для моделистов	kraska	краска	5	2	OV	Металлические части оружия вначале красят полностью в черный цвет или каким-либо из темных "металликов" (и такие краски для моделистов выпускают).	выпускать
Восторг детей и зависть соседей	vostorg	восторг	5	4	OV	Восторг детей и зависть соседей гарантируем.	гарантировать
более качественные товары и услуги	tovar	товар	5	2	OV	Чем более качественные товары и услуги приобретают граждане, тем выше официальный уровень инфляции, от которого так много зависит - от индексации пенсий до ставок по кредитам.	приобретать
экзамен, построенный по похожей схеме,	ekzamen	экзамен	5	6	OV	Почему мы "Свою игру" смотрим с удовольствием, в "Слабом звене" сопереживаем тому, кто набирает больше баллов, а когда экзамен, построенный по похожей схеме, предлагают всем, оказывается, что это начетничество, обман, механический подход к образованию, и вообще как можно трепетные терзания души загонять в прокрустово ложе квиза?	предлагать
Развитие малого и среднего бизнеса	razvitie	развитие	5	4	OV	Развитие малого и среднего бизнеса тормозит нехватка нежилого фонда - половина предпринимателей нуждаются либо в расширении площадей для своего дела, либо в новых помещениях.	тормозить
Лучшие кабинеты здания районной администрации	kabinet	кабинет	5	3	OV	Лучшие кабинеты здания районной администрации отдают под классы.	отдавать
почти всякое исторически устойчивое явление	javlenie	явление	5	0	OV	В публицистике, а зачастую и в научной литературе почти всякое исторически устойчивое явление именуют традицией.	именовать
Прекрасный повод для политизации переговоров	povod	повод	5	3	OV	Прекрасный повод для политизации переговоров дает не только сам конфликт, но и признание Россией независимости Южной Осетии и Абхазии.	давать
Объем налогов, которые платит отрасль,	ob'em	объем	5	8	OV	Объем налогов, которые платит отрасль, никто не знает.	знать
Элективные курсы ( курсы по выбору )	kurs	курс	5	8	OV	Элективные курсы (курсы по выбору) в провинции сегодня пишут сами учителя.	писать
Игрока, у которого белые фигуры,	igrok	игрок	5	7	OV	Игрока, у которого белые фигуры, часто называют просто "белыми", игрока, у которого черные, - "черными".	называть
Свой вклад в этот процесс	vklad	вклад	5	3	OV	Свой вклад в этот процесс вносят и океанические водоросли, связывающие в ходе фотосинтеза атмосферную двуокись углерода.	вносить
самые интересные выдержки из которой	vyderzhka	выдержка	5	2	OV	Главные итоги подводит в понедельник российская пресса, самые интересные выдержки из которой приводит сайт "Заголовки".	приводить
курс внутренней и внешней политики,	kurs	курс	5	9	OV	Во-вторых, курс внутренней и внешней политики, согласно действующей Конституции, определяет президент.	определять
большую пятерку и горячую десятку	pjaterka	пятерка	5	3	OV	Предприниматели и профессионалы, которые стремятся преуспеть в условиях сверхновой экономики, большую пятерку и горячую десятку превращают в капитал, развивая глэм-капитализм.	превращать
Политиков, аналитиков, публицистов и блогеров	politik	политик	5	6	OV	Политиков, аналитиков, публицистов и блогеров занимают в первую очередь отнюдь не спортивные ее аспекты.	занимать
важную роль в этом процессе	rol'	роль	5	3	OV	Однако можно с уверенностью утверждать, что важную роль в этом процессе играет ген FOXP2, который, как показали недавние исследования, одинаково важен и для неречевой вокализации мышей, и для речи человека.	играть
какие возможности для развития общества	vozmozhnost'	возможность	5	3	OV	Французы победным маршем шли по Европе на восток, и это заставляло немцев задумываться не только о трагических эксцессах революционного террора в Париже, но и о том, как чувство свободы мобилизует нацию на гигантские свершения, а самое главное, о том, какие возможности для развития общества дает кодекс Наполеона, гарантирующий право собственности.	давать
исполнительного директора ассоциации Лилию Шибанову	direktor	директор	5	3	OV	За отказ регистрироваться "иностранным агентом" суд может оштрафовать "ГОЛОС" на 500 тыс. рублей, а исполнительного директора ассоциации Лилию Шибанову оштрафует на 300 тыс. рублей.	оштрафовывать
любого пассажира, пользующегося услугами авиации,	passazhir	пассажир	5	5	OV	Как известно, любого пассажира, пользующегося услугами авиации, подстерегают несколько опасностей.	подстерегать
День памяти жертв политических репрессий	den'	день	5	6	OV	День памяти жертв политических репрессий во вторник отмечают во всем Верхневолжье.	отмечать
какую температуру в стиральной машине	temperatura	температура	5	4	OV	Банкноты тестировались на предмет того, какую температуру в стиральной машине они выдержат.	выдержать
всенощную в честь Рождества Христова	vsenoschnaja	всенощная	5	4	OV	Усилена охрана дворца Святого Петра, где в понедельник всенощную в честь Рождества Христова проведет папа Римский Иоанн Павел Второй.	провести
внесение законопроекта о Конституционном собрании	vnesenie	внесение	5	4	OV	В свою очередь Сергей Миронов отметил, что, как планируется, внесение законопроекта о Конституционном собрании инициирует Совет Федерации.	инициировать
Поиски Су - 24 под Псковом	poisk	поиск	5	5	OV	Поиски Су-24 под Псковом ведут более сотни военнослужащих и 12 единиц техники, сообщили в пресс-службе МЧС России.	вести
Серьезное влияние на настроения инвесторов	vlijanie	влияние	5	3	OV	Серьезное влияние на настроения инвесторов оказывает неопределенность вокруг ситуации с заложниками.	оказывать
это ведь его рейс, его	rejs	рейс	5	0	OV	И каково было Монахову, прикинувшему общее опоздание и уже твердо рассчитывавшему вылететь никак не позже, чем… вдруг осознать, что это ведь его рейс выкликают первым, его!	выкликать
Дальнейшее совершенствование деятельности высшей школы	sovershenstvovanie	совершенствование	5	4	OV	Дальнейшее совершенствование деятельности высшей школы мы связываем с реализацией постановлений партии и правительства по перестройке высшего образования, идей, содержащихся в резолюциях XIX Всесоюзной партийной конференции.	связывать
Ответ на столь актуальный вопрос	otvet	ответ	5	4	OV	Ответ на столь актуальный вопрос содержит принятое на днях постановление ЦК КПСС "О движении за коллективную гарантию трудовой и общественной дисциплины".	содержать
быстрый эффект в этом отношении	effekt	эффект	5	3	OV	И быстрый эффект в этом отношении дают льготы.	давать
слой, получившийся очень твердым, бугристым,	sloj	слой	5	11	OV	Приходится наращивать в тысячу раз больше металла, чем нужно для восстановления первоначального диаметра, а потом слой, получившийся очень твердым, бугристым, с трудом почти весь срезают, а на цилиндрике вновь нарезают канавки для выхода стружки.	срезать
Вновь изготовленные развертки или протяжки	razvertka	развертка	5	6	OV	Вновь изготовленные развертки или протяжки после термообработки или заточки помещают в печь с атмосферой из водяного пара и аммиака и выдерживают от 20 минут до 1 часа при температуре 520 - 560 С.	помещать
электронные схемы на кристаллической пленке	shema	схема	5	3	OV	Обычно электронные схемы на кристаллической пленке выращивают в кристаллизаторах.	выращивать
Все свои надежды на лучшее	nadezhda	надежда	5	3	OV	Все свои надежды на лучшее мы связываем с перестройкой.	связывать
смысл и суть самого утверждения	smysl	смысл	5	12	OV	Но смысл и суть самого утверждения это сомнение, на мой взгляд, не меняет, а они, эти смысл и суть, в том, что революция и Гражданская война завершились победой и утверждением власти большинства.	менять
Нефть, металлы и все остальное	neft'	нефть	5	8	OV	Нефть, металлы и все остальное из недр не достанешь, поэтому производить будут здесь.	достать
какие гигантские непрерывные механические нагрузки	nagruzka	нагрузка	5	0	OV	Неискушенные люди не понимают, какие гигантские непрерывные механические нагрузки выдерживают различные части корпуса.	выдерживать
какой номер с выдыханием огня	nomer	номер	5	4	OV	Совсем мало, сравнимо с горючим на дне стаканчика - его выносит молодая Елена, чтобы показать, какой номер с выдыханием огня она показывает в барах.	показывать
одно и то же слово	slovo	слово	5	3	OV	Особенно интересно, когда одно и то же слово в разных местах употребляют с противоположным значением.	употреблять
Свободный доступ к массовой культуре	dostup	доступ	5	6	OV	Свободный доступ к массовой культуре нынешнее молодое поколение воспринимает как то, что было всегда, как некий естественный фон.	воспринимать
какие-то вещи, связанные с милосердием,	vesch'	вещь	5	5	OV	Я, например, какие-то вещи, связанные с милосердием, считаю попыткой осмыслить жизнь.	считать
[truncated: 10,449 more rows]
