# Supplementary material for: Efficient sentence processing significantly affects the position of objects in Russian
Source: publisher site journal article supplement (doi:10.1515/ling-2023-0164), 2025-11-19
Supplement: Supplementary file 3 [file j_ling-2023-0164_suppl_003.xlsx]

## Sheet: result5
object	object translit	object head	object length	distance	order	sentence	verb
то, что не доберет в исходном растворе одна мембрана,	to	то	9	10	OV	Мембраны, ограниченные перегородками, нужно собрать в пакет, тогда то, что не доберет в исходном растворе одна мембрана, доберет вторая, третья и т. д.	добрать
То, что упущено,	to	то	3	6	OV	- То, что упущено, уже не вернешь.	вернуть
То, что не сумел отнять один,	to	то	6	7	OV	То, что не сумел отнять один, отнимет другой, следующий.	отнять
не то	to	то	2	0	OV	Знаете, мы так долго ругали СМИ за то, что они не то пишут и показывают, и только теперь поняли: надо с ними сотрудничать.	писать
То, что было в самом начале,	to	то	6	13	OV	То, что было в самом начале, мы, конечно, никогда не узнаем, все же остальное есть следствие этого удивительного взрыва или скачка.	узнать
то, что дает раскоп, то	to	то	5	8	OV	Возможно, их было гораздо больше, чем каменных, но то, что дает раскоп, то он и дает.	давать
То, что жертв на Дубровке было так много,	to	то	8	9	OV	То, что жертв на Дубровке было так много, связывают с применением неизвестного газа, отсутствием антидотов, неправильной сортировкой, транспортировкой, отсутствием догоспитального периода, доставкой большого числа пострадавших в ближайшие больницы.	связывать
То, что на здоровье человека влияют погодные и климатические условия,	to	то	10	12	OV	То, что на здоровье человека влияют погодные и климатические условия, ученые знают давно.	знать
то, что делает правительство,	to	то	4	5	OV	- Сергей Юрьевич, судя по вашим последним выступлениям, высказанные в президентском Послании экономические инициативы вы поддерживаете, а то, что делает правительство, критикуете.	критиковать
То же самое	to	то	3	5	OV	То же самое на разные лады повторяют наши законодатели - сенаторы и депутаты нижней палаты.	повторять
то	to	то	1	0	OV	Ну, вот, что имеем, то имеем.	иметь
То же самое	to	то	3	5	OV	То же самое мы с вами видим в Москве и других крупных городах в самых разных отраслях.	видеть
то, что не доберет в исходном растворе одна мембрана,	to	то	9	10	OV	Мембраны, ограниченные перегородками, нужно собрать в пакет, тогда то, что не доберет в исходном растворе одна мембрана, доберет вторая, третья и т. д.	добрать
То же самое	to	то	3	3	OV	То же самое Данилевский говорит и о самой влиятельной русской газете того времени - "Московских ведомостях".	говорить
то же самое	to	то	3	2	OV	Сейчас то же самое пишут в отношении пенсий.	писать	5
то, что китайцы называют `` Десятью тысячами вещей ``, то есть мир сотворённый	to	то	11	0	VO	Идеями противопоставления света и тьмы изобилуют многие оккультные магические символы, но суть у них всё время одна: свет (ян) и тьма (инь) вечно возвращаются, следуя друг за другом, и порождают то, что китайцы называют ``Десятью тысячами вещей``, то есть мир сотворённый.	порождать
то, что хотим	to	то	3	0	VO	Но когда пятьдесят на пятьдесят, мы выбираем то, что хотим.	выбирать
то, от чего российские исследователи давно отказались	to	то	7	1	VO	Довольно часто западные специалисты в области реконструкции объявляют новациями то, от чего российские исследователи давно отказались.	объявлять
то, что совершенно невероятно	to	то	4	1	VO	По-настоящему интересна именно такая теория, которая наиболее последовательно, убедительно доказывает нам то, что совершенно невероятно.	доказывать
то, что папа держит лупу в левой руке	to	то	8	0	VO	С другой стороны, особый интерес вызывает то, что папа держит лупу в левой руке.	вызывать
не совсем то же самое, что _ в отношении Мавроди и	to	то	11	2	VO	Словосочетание "финансовая пирамида" красивое, но вообще говоря, в отношении государств оно значит не совсем то же самое, что в отношении Мавроди и Мэдоффа.	значить
лишь то, что знаем	to	то	4	1	VO	Но пока мы знаем лишь то, что знаем.	знать
то, что практически все чингизиды ( прямые потомки Чингисхана ) были казахами, правившими казахским государством вплоть до начала двадцатого века	to	то	18	0	VO	Еще одним серьезным доказательством того, что Чингисхан казах, ученые считают то, что практически все чингизиды (прямые потомки Чингисхана) были казахами, правившими казахским государством вплоть до начала двадцатого века.	считать
то, что заслужили, чему недавно и была свидетелем вся страна	to	то	10	0	VO	У нас сейчас нет ни того, ни другого, и поэтому мы получаем то, что заслужили, чему недавно и была свидетелем вся страна.	получать
примерно то же, что в советскую эпоху значили слова " социалистическая демократия " или " нерушимый союз партии и народа "	to	то	17	1	VO	Эти нехитрые риторические обороты значат примерно то же, что в советскую эпоху значили слова "социалистическая демократия" или "нерушимый союз партии и народа".	значить
то, что по всей стране совершается под сурдинку - несменяемость " демократически сменяемой " власти	to	то	12	1	VO	В общем, Чечня в голом виде показывает нам то, что по всей стране совершается под сурдинку - несменяемость "демократически сменяемой" власти.	показывать
то, как мы живем, думаем, чувствуем и видим	to	то	8	2	VO	Достижения науки и техники в XXI веке, вполне возможно, изменят до неузнаваемости то, как мы живем, думаем, чувствуем и видим.	изменить
то, что власть устроена неким единообразным способом,	to	то	7	2	VO	- Если вы имеете в виду то, что власть устроена неким единообразным способом, то это правильное построение государства.	иметь
то, что он обязан делать	to	то	5	0	VO	- Европейский союз делает то, что он обязан делать, - отслеживает все события в Европе и разрабатывает некую солидарную позицию по всем ключевым вопросам.	делать
то, что Вебер называл институтами легитимного насилия и что Путин позволил им превратить в институты нелегитимного насилия	to	то	17	0	VO	Это естественно, ибо они уже контролируют то, что Вебер называл институтами легитимного насилия и что Путин позволил им превратить в институты нелегитимного насилия.	контролировать
то, что до этого пишет пресса	to	то	6	0	VO	Недавно мне пожаловался один коллега из Германии: "У нас в Германии политики говорят то, что до этого пишет пресса".	говорить
ровно то, что мы имеем и в социуме : монополию групп	to	то	10	3	VO	Мы имеем в правительстве ровно то, что мы имеем и в социуме: монополию групп.	иметь
и то и другое	to	то	4	1	VO	Теперь Алиса с легкостью и удовольствием делает и то и другое.	делать
то, что говорил сам, но не простит другим	to	то	8	1	VO	Он простит себе то, что говорил сам, но не простит другим.	простить
то, что метод его решения даже более интересен, чем само решение проблемы	to	то	12	0	VO	В подтверждение вспоминаю фрагмент моей беседы с Жаном-Мишелем Бисмутом о вкладе Перельмана: "Поражает то, что метод его решения даже более интересен, чем само решение проблемы.	поражать
, грубо говоря, то, что происходит на поверхности твердого тела - например, кристалла	to	то	11	4	VO	Физика поверхности изучает, грубо говоря, то, что происходит на поверхности твердого тела - например, кристалла.	изучать
то, что очень похоже на завещание	to	то	6	0	VO	Газета - не самое подходящее место для проповедей, а Раиса Павловна Кучуганова не экскурсии по музею водит, а именно проповедует: через нее старообрядцы, не склонные открывать душу перед людьми "с ветра", доносят то, что очень похоже на завещание.	доносить
и то	to	то	2	1	VO	Государственные лица России в публичных выступлениях делают и то и другое.	делать
лишь то, что им легко дается	to	то	6	1	VO	Но, как ни странно, свобода выбора вовсе не приводит к тому, что ученики делают лишь то, что им легко дается.	делать
то, что произошло сегодня	to	то	4	0	VO	Он не столько вспоминает, сколько делится своими воспоминаниями, сообщает новости, рассказывает то, что произошло сегодня.	рассказывать
то, что стороны " наконец - то начали говорить на одном языке "	to	то	10	0	VO	Главным достижением встречи губернатор, который настаивал на том, чтобы решение экономических вопросов предшествовало шагам к возможному объединению субъектов Федерации, считает то, что стороны "наконец-то начали говорить на одном языке".	считать
то, что им необходимо	to	то	4	0	VO	"Матерям-одиночкам, прежде всего, нужна помощь и поддержка, и у нас они находят то, что им необходимо.	находить
то, что жизнь оппозиционеров начала налаживаться	to	то	6	6	VO	Означает ли возвращение Гудкова в избирательную гонку то, что жизнь оппозиционеров начала налаживаться?	означать
ровно то же, что мы кричим : " Верните все назад ! "	to	то	9	1	VO	В Европе кричат ровно то же, что мы кричим: "Верните все назад!"	кричать
то, что считает нужным	to	то	4	1	VO	Это хорошая иллюстрация к парадоксальной на первый взгляд мысли, которую высказал российский нейробиолог, член-корреспондент РАН Константин Анохин: "Мозг делает все сам; и только иногда сообщает нам то, что считает нужным".	сообщать
не то же самое, что _	to	то	6	1	VO	Я специально сравнивал русские и польские тексты - в некоторых местах переводчики ошибались, потому что не могли себе представить, что по-польски это слово значит не то же самое, что по-русски.	значить
то, что к расследованию подключились специалисты из ФБР	to	то	8	0	VO	Осторожный оптимизм в отношении того, что это преступление не уйдет в разряд нераскрытых, внушает то, что к расследованию подключились специалисты из ФБР.	внушать
то же самое	to	то	3	0	VO	Наши руководители часто проводят параллели с политической практикой западных государств, доказывая, что страны, критикующие российское устройство, сами делают то же самое.	делать
то, что сам же высказал	to	то	5	0	VO	Получается, что экзаменатору первый раз и не надо было кивать головой, а надо было дождаться, пока ты уточнишь то, что сам же высказал.	уточнить
то, чему мои оппоненты ( равно как и часть соглашающихся ), скорее всего, не поверят	to	то	13	0	VO	Скажу то, чему мои оппоненты (равно как и часть соглашающихся), скорее всего, не поверят.	сказать
в первую очередь то, что должно производить впечатление на массового зрителя и слушателя и импонировать ему, - следовательно, самое броское и сенсационное, а отнюдь не самое серьезное и надежное	to	то	28	5	VO	А нынешние средства массовой информации, увы, оказываются первыми союзниками в распространении подобной дилетантской чепухи, потому что они говорят и пишут в первую очередь то, что должно производить впечатление на массового зрителя и слушателя и импонировать ему, - следовательно, самое броское и сенсационное, а отнюдь не самое серьезное и надежное.	говорить
именно то, что получает	to	то	4	1	VO	Никакого высокомерия: народ хочет именно то, что получает.	хотеть
только то, что, по приказу Махди, отрезанную голову Гордона насадили на ветку дерева, а тело бросили в колодец	to	то	18	1	VO	Мы знаем только то, что, по приказу Махди, отрезанную голову Гордона насадили на ветку дерева, а тело бросили в колодец.	знать
то, как был устроен мир Британской империи со второй половины XVIII века по конец XIX	to	то	15	0	VO	Читатель видит, что уже одно такое перечисление неплохо описывает то, как был устроен мир Британской империи со второй половины XVIII века по конец XIX.	описывать
то, что у меня в каких-то вопросах не хватает опыта	to	то	10	0	VO	Это компенсирует то, что у меня в каких-то вопросах не хватает опыта.	компенсировать
то, что им скажешь	to	то	4	0	VO	Они только повторяют то, что им скажешь…	повторять
то, что есть на самом деле, или то, к чему приспособлено наше ограниченное восприятие	to	то	14	3	VO	Более того, сюрпризы, которые нам преподносит этот микромир, пробуждают кое в ком здоровый скептицизм: находим ли мы там то, что есть на самом деле, или то, к чему приспособлено наше ограниченное восприятие?	находить
то, что ему необходимо для выживания и продолжения рода	to	то	9	8	VO	Шакал видит, обоняет и в доступной ему степени осознает то, что ему необходимо для выживания и продолжения рода, - именно поэтому ни стола, ни книжных полок он никогда не обнаружит, как мы его ни дрессируй.	видеть
то, что ему нужно, а не то, о чем писал автор	to	то	11	2	VO	Механизм личных предпочтений необъясним, у него нет общих правил, а читатель всегда вчитывает в книгу то, что ему нужно, а не то, о чем писал автор.	вчитывать
то, чего он заслуживает	to	то	4	0	VO	То есть человек получает то, чего он заслуживает.	получать
то же, что и я	to	то	5	3	VO	Ты загадаешь в эту полночь то же, что и я, Поймав тот самый миг когда стрелки по нулям, Но первым январским утром нас заберут друг у друга,	загадать
то что ты хотел	to	то	4	0	VO	Всегда хороший выбор цветов , продавец всегда посоветует то что ты хотел.	посоветовать
ТО	to	то	1	0	VO	Персонал компетентный, толково консультирует и производит ТО, и не впаривает ненужный товар.	производить
или то, у чего сегодня / завтра срок годности истекает, или уже с истекшим сроком годности	to	то	15	1	VO	Неоднократно замечал по целому ряду товаров (охлажденные курицы, мюсли, молочные продукты и др.) - продают или то, у чего сегодня/завтра срок годности истекает, или уже с истекшим сроком годности.	продавать
то, что ищешь	to	то	3	0	VO	Почти всегда найдёшь то, что ищешь.	найти
то, что нужно	to	то	3	0	VO	Всегда нахожу то, что нужно.	находить
только то, что он находится в Челябинске, скиньте координаты	to	то	9	1	VO	Я знаю только то, что он находится в Челябинске, скиньте координаты	знать
то, что это не сон	to	то	5	0	VO	я знаю то, что это не сон. надо все таки жить реалностью.	знать
то же, что и за 5 тысяч	to	то	7	0	VO	А то продаются кормушки и за 15 тысяч, а делают то же, что и за 5 тысяч.	делать
того	to	то	1	0	VO	Парень врывается в дом к молодожёнам, кусачками перерезает палец супругу и запирает того в ванной комнате (может быть нечто иное), ставит супруге условие, если она будет выполнять его требования, то в скором времени она сможет воссоединиться с любимым.	запирать
то, что предпочтет большинство	to	то	4	0	VO	Но лучше выберу то, что предпочтет большинство.	выбрать	8.08929
